# Supplementary material for: A Markov property for two parameter Gaussian processes.
Source: Royal Society of Chemistry journal article supplement (doi:10.1039/d2cc05245h), 1979-01-01

## Supplementary Information

### C–H amidation of 2-aryl azlactones under iridium(III) catalysis: access to chiral amino acids

Min Seo Park,<sup>‡</sup> Eunjae Chung,<sup>‡</sup> Neeraj Kumar Mishra, Sang Hoon Han, Sangil Han,  
Saegun Kim\* and In Su Kim\*

*School of Pharmacy, Sungkyunkwan University, Suwon 16419, Republic of Korea*

\* Corresponding authors. E-mail: [ksk6696@skku.edu](mailto:ksk6696@skku.edu) (S.Kim), [insukim@skku.edu](mailto:insukim@skku.edu) (I.S.Kim)

#### List of the Contents

|                                                                                                                                          |         |
|------------------------------------------------------------------------------------------------------------------------------------------|---------|
| General methods -----                                                                                                                    | S3      |
| General procedure and characterization data for the synthesis of 2-aryl azlactones (1a–1t and 5a–5e) -----                               | S4–S16  |
| General procedure and characterization data for the amidation of 2-aryl azlactones using acyl azides (3a–3t, 4b–4k, and 6a–6e) -----     | S17–S35 |
| General procedure and characterization data for the transformation into chiral amino acids (9a and 9b) and racemic amino acid (9c) ----- | S36–S39 |
| Experimental procedure of gram-scale reaction of 1a -----                                                                                | S40     |
| General procedure and characterization data for the formation of iridacycle-1a (CCDC 2162876) -----                                      | S41     |

**X-ray crystallographic data of compound 3a (CCDC 2154665) ----- S42–S49**

**X-ray crystallographic data of iridacycle-1a (CCDC 2162876) ----- S50–S60**

**$^1\text{H}$ ,  $^{13}\text{C}$ , and  $^{19}\text{F}$  NMR spectra of all compounds ----- S61–S130**

**HRMS data of all compounds ----- S131–S193**

## General methods

Commercially available reagents were used without additional purification, unless otherwise stated. Sealed tubes ( $13 \times 100 \text{ mm}^2$ ) were purchased from Fischer Scientific and dried in oven for overnight and cooled at room temperature prior to use. Thin layer chromatography was carried out using plates coated with Kieselgel 60 F<sub>254</sub> (Merck). For flash column chromatography, E. Merck Kieselgel 60 (230–400 mesh) was used. Nuclear magnetic resonance spectra (<sup>1</sup>H and <sup>13</sup>C NMR) were recorded on a Bruker Unity 400 spectrometers and 700 spectrometers in CDCl<sub>3</sub> solution and chemical shifts are reported as parts per million (ppm). Resonance patterns are reported with the notations s (singlet), d (doublet), t (triplet), q (quartet), and m (multiplet). Coupling constants (*J*) are reported in hertz (Hz). IR spectra were recorded on a JASCO FT/IR-4600 spectrophotometer and are reported as cm<sup>-1</sup>. High-resolution mass spectra (HRMS) were recorded on a JEOL JMS-600 spectrometer. Enantiomeric excess (ee %) was determined by analytical liquid chromatography (HPLC) with DAICEL CHIRALPAK<sup>®</sup> AD-H ( $4.6 \times 250 \text{ mm}$ ) in comparison with racemic samples.

## General procedure and characterization data for the synthesis of 2-aryl azlactones (1a–1t and 5a–5e)

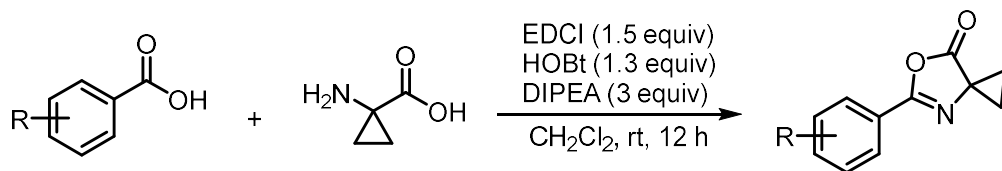

To an oven-dried sealed tube charged with benzoic acid (10 mmol), 1-aminocyclopropane-1-carboxylic acid (11 mmol, 1.1 equiv), HOBt (13 mmol, 1.3 equiv), EDCI (15 mmol, 1.5 equiv), and DIPEA (30 mmol, 3 equiv) was added in DCM (50 mL) under air. The reaction mixture was allowed to stir for 12 h at room temperature. The reaction mixture was diluted with DCM (50 mL) and poured into saturated NaCl solution. Extractive workup with DCM (2 x 50 mL). The combined organic layer was dried over MgSO<sub>4</sub>, filtered, and concentrated under reduced pressure. The residue was purified by flash column chromatography (*n*-hexanes/EtOAc = 30:1 to 15:1) to afford 2-phenyloxazol-5(4*H*)-ones (**1a–1t** and **5a–5e**).

### 5-(*p*-Tolyl)-6-oxa-4-azaspiro[2.4]hept-4-en-7-one (**1a**)

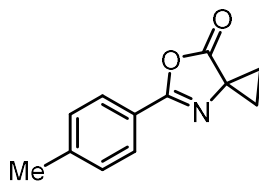

**1a**

1.61 g (80%); white solid; mp = 101.1–103.1 °C; <sup>1</sup>H NMR (400 MHz, CDCl<sub>3</sub>) δ 7.85 (d, *J* = 8.0 Hz, 2H), 7.28 (d, *J* = 8.0 Hz, 2H), 2.42 (s, 3H), 1.88–1.82 (m, 2H), 1.81–1.75 (m, 2H); <sup>13</sup>C NMR (100 MHz, CDCl<sub>3</sub>) δ 178.8, 162.0, 143.1, 129.7, 127.3, 123.4, 48.3, 21.8, 19.7; IR (KBr) ν 3093, 2923, 1808, 1635, 1573, 1511, 1446, 1411, 1319, 1268, 1180, 1103, 1029, 1006, 971, 917, 863, 829 cm<sup>-1</sup>; HRMS (quadrupole, EI) calcd for C<sub>12</sub>H<sub>11</sub>NO<sub>2</sub> [M]<sup>+</sup> 201.0790, found 201.0787.

### 5-(4-Chlorophenyl)-6-oxa-4-azaspiro[2.4]hept-4-en-7-one (**1b**)

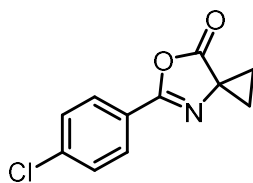

**1b**

1.32 g (60%); white solid; mp = 121.3–123.4 °C;  $^1\text{H}$  NMR (400 MHz,  $\text{CDCl}_3$ )  $\delta$  7.90 (d,  $J$  = 8.4 Hz, 2H), 7.46 (d,  $J$  = 8.4 Hz, 2H), 1.90–1.85 (m, 2H), 1.83–1.78 (m, 2H);  $^{13}\text{C}$  NMR (100 MHz,  $\text{CDCl}_3$ )  $\delta$  178.3, 161.0, 138.7, 129.3, 128.69, 124.7, 48.5, 19.9; IR (KBr)  $\nu$  3104, 3085, 3062, 2927, 1801, 1731, 1631, 1596, 1565, 1488, 1403, 1311, 1268, 1087, 1033, 1002, 968, 914, 860, 840  $\text{cm}^{-1}$ ; HRMS (quadrupole, EI) calcd for  $\text{C}_{11}\text{H}_8\text{ClNO}_2$   $[\text{M}]^+$  221.0244, found 221.0240.

#### 5-(4-(Trifluoromethyl)phenyl)-6-oxa-4-azaspiro[2.4]hept-4-en-7-one (1c)

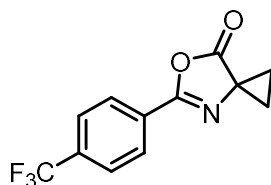

**1c**

1.45 g (57%); white solid; mp = 110.5–112.9 °C;  $^1\text{H}$  NMR (400 MHz,  $\text{CDCl}_3$ )  $\delta$  8.12 (d,  $J$  = 8.8 Hz, 2H), 7.77 (d,  $J$  = 8.8 Hz, 2H), 1.97–1.92 (m, 2H), 1.90–1.85 (m, 2H);  $^{13}\text{C}$  NMR (100 MHz,  $\text{CDCl}_3$ )  $\delta$  178.0, 160.7, 133.9 (q,  $J_{\text{C-F}}$  = 32.5 Hz), 129.5, 127.7, 125.5 (q,  $J_{\text{C-F}}$  = 4.0 Hz), 124.7 (q,  $J_{\text{C-F}}$  = 270.9 Hz), 48.7, 20.2; IR (KBr)  $\nu$  2927, 2854, 1808, 1635, 1577, 1515, 1438, 1411, 1322, 1272, 1160, 1122, 1099, 1068, 1006, 971, 914, 856  $\text{cm}^{-1}$ ; HRMS (quadrupole, EI) calcd for  $\text{C}_{12}\text{H}_8\text{F}_3\text{NO}_2$   $[\text{M}]^+$  255.0507, found 255.0509.

#### 5-Phenyl-6-oxa-4-azaspiro[2.4]hept-4-en-7-one (1d)

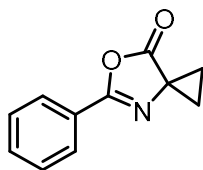

**1d**

599.0 mg (32%); white solid; mp = 152.0–154.7 °C; <sup>1</sup>H NMR (400 MHz, CDCl<sub>3</sub>) δ 7.97 (d, *J* = 7.2 Hz, 2H), 7.55 (t, *J* = 7.2 Hz, 1H), 7.48 (t, *J* = 7.2 Hz, 2H), 1.90–1.84 (m, 2H), 1.83–1.77 (m, 2H); <sup>13</sup>C NMR (100 MHz, CDCl<sub>3</sub>) δ 178.6, 161.9, 132.5, 128.9, 127.4, 126.3, 48.4, 19.8; IR (KBr) ν 2923, 2854, 1789, 1631, 1577, 1492, 1450, 1322, 1268, 1180, 1103, 1033, 1006, 971, 921, 863 cm<sup>-1</sup>; HRMS (quadrupole, EI) calcd for C<sub>11</sub>H<sub>9</sub>NO<sub>2</sub> [M]<sup>+</sup> 187.0633, found 187.0634.

**5-(*m*-Tolyl)-6-oxa-4-azaspiro[2.4]hept-4-en-7-one (1e)**

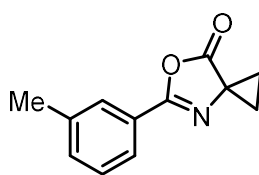

**1e**

1.25 g (62%); white solid; mp = 110.9–112.0 °C; <sup>1</sup>H NMR (400 MHz, CDCl<sub>3</sub>) δ 7.80 (s, 1H), 7.77–7.75 (m, 1H), 7.37–7.36 (m, 2H), 2.41 (s, 3H), 1.90–1.84 (m, 2H), 1.83–1.77 (m, 2H); <sup>13</sup>C NMR (100 MHz, CDCl<sub>3</sub>) δ 178.1, 162.1, 138.8, 133.3, 128.8, 127.8, 126.1, 124.6, 48.3, 21.4, 19.7; IR (KBr) ν 3008, 2927, 2854, 1793, 1724, 1627, 1577, 1481, 1457, 1430, 1303, 1276, 1199, 1110, 1037, 971, 921, 887 cm<sup>-1</sup>; HRMS (quadrupole, EI) calcd for C<sub>12</sub>H<sub>11</sub>NO<sub>2</sub> [M]<sup>+</sup> 201.0790, found 201.0788.

**5-(3-Chlorophenyl)-6-oxa-4-azaspiro[2.4]hept-4-en-7-one (1f)**

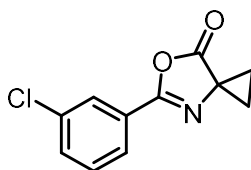

**1f**

1.06 g (48%); white solid; mp = 113.8–116.0 °C; <sup>1</sup>H NMR (400 MHz, CDCl<sub>3</sub>) δ 7.97 (s, 1H), 7.84 (d, *J* = 8.0 Hz, 1H), 7.52 (d, *J* = 8.0 Hz, 1H), 7.42 (t, *J* = 8.0 Hz, 1H), 1.92–1.87 (m, 2H), 1.85–1.80 (m, 2H); <sup>13</sup>C NMR (100 MHz, CDCl<sub>3</sub>) δ 178.1, 160.7, 135.2, 132.5, 130.3, 127.9, 127.4, 125.4, 48.5, 20.1; IR (KBr) ν 2927, 2854, 1793, 1724, 1627, 1573, 1481, 1461, 1427, 1303, 1276,

1199, 1110, 1033, 971, 921, 890  $\text{cm}^{-1}$ ; HRMS (quadrupole, EI) calcd for  $\text{C}_{11}\text{H}_8\text{ClNO}_2$   $[\text{M}]^+$  221.0244, found 221.0240.

**5-(3-Bromophenyl)-6-oxa-4-azaspiro[2.4]hept-4-en-7-one (1g)**

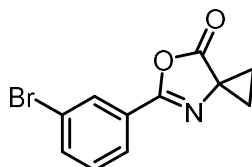

**1g**

1.45 g (43%); white solid; mp = 111.4–114.1  $^{\circ}\text{C}$ ;  $^1\text{H}$  NMR (400 MHz,  $\text{CDCl}_3$ )  $\delta$  8.13 (s, 1H), 7.88 (d,  $J$  = 8.0 Hz, 1H), 7.67 (d,  $J$  = 8.0 Hz, 1H), 7.36 (t,  $J$  = 8.0 Hz, 1H), 1.92–1.86 (m, 2H), 1.85–1.790 (m, 2H);  $^{13}\text{C}$  NMR (100 MHz,  $\text{CDCl}_3$ )  $\delta$  178.1, 160.6, 135.4, 130.5, 130.3, 128.1, 125.9, 123.0, 48.5, 20.1; IR (KBr)  $\nu$  2927, 2854, 1808, 1635, 1562, 1473, 1423, 1322, 1303, 1272, 1195, 1168, 1114, 1025, 971, 917, 871  $\text{cm}^{-1}$ ; HRMS (quadrupole, EI) calcd for  $\text{C}_{11}\text{H}_8\text{BrNO}_2$   $[\text{M}]^+$  264.9738, found 264.9735.

**5-(*o*-Tolyl)-6-oxa-4-azaspiro[2.4]hept-4-en-7-one (1h)**

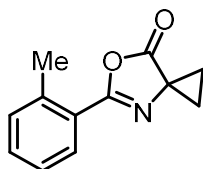

**1h**

1.33 g (63%); white solid; mp = 116.6–118.1  $^{\circ}\text{C}$ ;  $^1\text{H}$  NMR (400 MHz,  $\text{CDCl}_3$ )  $\delta$  7.87 (d,  $J$  = 8.0 Hz, 1H), 7.40 (t,  $J$  = 8.0 Hz, 1H), 7.31–7.28 (m, 2H), 2.62 (s, 3H), 1.90–1.84 (m, 2H), 1.83–1.77 (m, 2H);  $^{13}\text{C}$  NMR (100 MHz,  $\text{CDCl}_3$ )  $\delta$  178.8, 162.0, 139.3, 131.9, 131.6, 129.5, 126.1, 125.1, 48.5, 22.1, 19.9; IR (KBr)  $\nu$  3097, 3023, 2985, 2927, 1789, 1623, 1569, 1488, 1457, 1427, 1322, 1261, 1095, 998, 979, 925, 860  $\text{cm}^{-1}$ ; HRMS (quadrupole, EI) calcd for  $\text{C}_{12}\text{H}_{11}\text{NO}_2$   $[\text{M}]^+$  201.0790, found 201.0790.

**5-(2-Fluorophenyl)-6-oxa-4-azaspiro[2.4]hept-4-en-7-one (1i)**

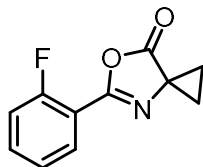

**1i**

656.6 mg (32%); white solid; mp = 134.2–135.2 °C; <sup>1</sup>H NMR (400 MHz, CDCl<sub>3</sub>) δ 7.90 (td, *J* = 7.6, 2.0 Hz, 1H), 7.55–7.49 (m, 1H), 7.27–7.18 (m, 2H), 1.96–1.89 (m, 2H), 1.87–1.79 (m, 2H); <sup>13</sup>C NMR (100 MHz, CDCl<sub>3</sub>) δ 178.0, 161.1 (d, *J*<sub>C-F</sub> = 258.8 Hz), 158.5 (d, *J*<sub>C-F</sub> = 5.8 Hz), 134.0 (d, *J*<sub>C-F</sub> = 8.7 Hz), 130.2, 124.5 (d, *J*<sub>C-F</sub> = 3.6 Hz), 117.1 (d, *J*<sub>C-F</sub> = 21.1 Hz), 114.7 (d, *J*<sub>C-F</sub> = 9.8 Hz), 48.4, 20.2; IR (KBr) ν 3100, 3008, 2927, 1793, 1631, 1577, 1492, 1454, 1423, 1319, 1272, 1230, 1095, 1006, 975, 925, 863, 821 cm<sup>-1</sup>; HRMS (quadrupole, EI) calcd for C<sub>11</sub>H<sub>8</sub>FNO<sub>2</sub> [M]<sup>+</sup> 205.0539, found 205.0538.

**5-(Naphthalen-2-yl)-6-oxa-4-azaspiro[2.4]hept-4-en-7-one (1j)**

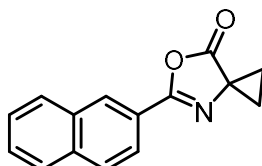

**1j**

1.35 g (57%); white solid; mp = 160.1–161.4 °C; <sup>1</sup>H NMR (400 MHz, CDCl<sub>3</sub>) δ 8.48 (s, 1H), 8.02 (d, *J* = 8.4 Hz, 1H), 7.95–7.87 (m, 3H), 7.61–7.54 (m, 2H), 1.94–1.88 (m, 2H), 1.87–1.81 (m, 2H); <sup>13</sup>C NMR (100 MHz, CDCl<sub>3</sub>) δ 178.6, 162.0, 135.2, 132.8, 129.2, 128.9, 128.5, 128.3, 128.0, 127.1, 123.5, 123.1, 48.6, 19.9; IR (KBr) ν 3085, 3058, 3035, 3008, 1793, 1627, 1592, 1508, 1450, 1423, 1357, 1322, 1276, 1234, 1095, 1018, 968, 944, 921, 890, 829 cm<sup>-1</sup>; HRMS (quadrupole, EI) calcd for C<sub>15</sub>H<sub>11</sub>NO<sub>2</sub> [M]<sup>+</sup> 237.0790, found 237.0785.

**5-(Pyren-1-yl)-6-oxa-4-azaspiro[2.4]hept-4-en-7-one (1k)**



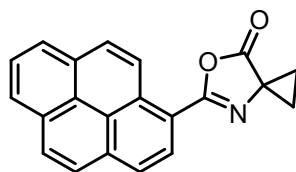

**1k**

1.03 g (33%); yellow solid; mp = 241.7–243.3 °C; <sup>1</sup>H NMR (700 MHz, CDCl<sub>3</sub>) δ 9.43 (d, *J* = 9.8 Hz, 1H), 8.60 (d, *J* = 8.4 Hz, 1H), 8.28 (t, *J* = 8.4 Hz, 2H), 8.25–8.18 (m, 3H), 8.10–8.06 (m, 2H), 2.08–2.06 (m, 2H), 1.94–1.92 (m, 2H); <sup>13</sup>C NMR (175 MHz, CDCl<sub>3</sub>) δ 178.6, 162.3, 134.1, 131.2, 130.6, 130.3, 129.8, 129.0, 127.4, 127.3, 126.7, 126.6, 126.5, 125.0, 124.9, 124.6, 124.3, 118.8, 48.9, 20.2; IR (KBr) ν 3043, 2919, 2854, 1793, 1608, 1538, 1511, 1461, 1384, 1322, 1253, 1238, 1199, 1091, 1064, 998, 971, 917, 840 cm<sup>-1</sup>; HRMS (quadrupole, EI) calcd for C<sub>21</sub>H<sub>13</sub>NO<sub>2</sub> [M]<sup>+</sup> 311.0946, found 311.0941.

**5-(Benzo[*d*][1,3]dioxol-5-yl)-6-oxa-4-azaspiro[2.4]hept-4-en-7-one (1l)**

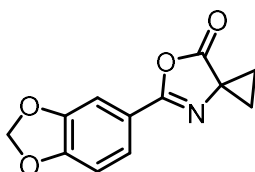

**1l**

0.95 g (41%); white solid; mp = 143.3–145.4 °C; <sup>1</sup>H NMR (400 MHz, CDCl<sub>3</sub>) δ 7.52 (d, *J* = 8.4 Hz, 1H), 7.40 (s, 1H), 6.88 (d, *J* = 8.4 Hz, 1H), 6.05 (s, 2H), 1.85–1.80 (m, 2H), 1.78–1.73 (m, 2H); <sup>13</sup>C NMR (100 MHz, CDCl<sub>3</sub>) δ 178.6, 161.3, 151.3, 148.3, 122.9, 120.2, 108.6, 107.2, 102.0, 48.3, 19.6; IR (KBr) ν 3104, 3012, 2904, 1801, 1639, 1492, 1450, 1365, 1326, 1299, 1265, 1230, 1087, 1037, 1014, 975, 906, 844, 817 cm<sup>-1</sup>; HRMS (quadrupole, EI) calcd for C<sub>12</sub>H<sub>9</sub>NO<sub>4</sub> [M]<sup>+</sup> 231.0532, found 231.0530.

**5-(1-Methyl-1*H*-indol-5-yl)-6-oxa-4-azaspiro[2.4]hept-4-en-7-one (1m)**

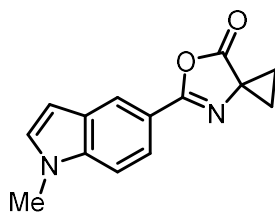

**1m**

1.37 g (57%); white solid; mp = 173.3–174.9 °C;  $^1\text{H}$  NMR (400 MHz,  $\text{CDCl}_3$ )  $\delta$  8.27 (s, 1H), 7.87 (dd,  $J$  = 8.8, 1.6 Hz, 1H), 7.38 (d,  $J$  = 8.8 Hz, 1H), 7.13 (d,  $J$  = 3.2 Hz, 1H), 6.58 (d,  $J$  = 3.2 Hz, 1H), 3.83 (s, 3H), 1.88–1.82 (m, 2H), 1.81–1.74 (m, 2H);  $^{13}\text{C}$  NMR (100 MHz,  $\text{CDCl}_3$ )  $\delta$  179.2, 163.0, 138.7, 130.5, 128.3, 121.5, 120.6, 117.3, 109.7, 102.6, 48.2, 33.2, 19.4; IR (KBr)  $\nu$  3097, 3004, 2923, 1789, 1708, 1627, 1565, 1488, 1454, 1423, 1319, 1272, 1241, 1180, 1149, 1087, 1010, 975, 917, 890, 848, 802  $\text{cm}^{-1}$ ; HRMS (quadrupole, EI) calcd for  $\text{C}_{14}\text{H}_{12}\text{N}_2\text{O}_2$   $[\text{M}]^+$  240.0899, found 240.0899.

**5-(Furan-3-yl)-6-oxa-4-azaspiro[2.4]hept-4-en-7-one (1n)**

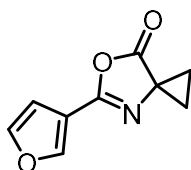

**1n**

545.4 mg (31%); white solid; mp = 120.1–121.8 °C;  $^1\text{H}$  NMR (400 MHz,  $\text{CDCl}_3$ )  $\delta$  8.01–7.98 (m, 1H), 7.50 (t,  $J$  = 2.0 Hz, 1H), 6.80 (dd,  $J$  = 2.4, 0.8 Hz, 1H), 1.85–1.79 (m, 2H), 1.78–1.71 (m, 2H);  $^{13}\text{C}$  NMR (100 MHz,  $\text{CDCl}_3$ )  $\delta$  178.1, 157.1, 145.3, 144.6, 114.9, 108.2, 47.7, 19.5; IR (KBr)  $\nu$  3151, 3116, 2927, 1797, 1654, 1511, 1400, 1319, 1272, 1160, 1130, 1052, 975, 937, 917, 871, 829  $\text{cm}^{-1}$ ; HRMS (quadrupole, EI) calcd for  $\text{C}_{21}\text{H}_{15}\text{NO}_2$   $[\text{M}]^+$  177.0426, found 177.0426.

**5-(Thiophen-2-yl)-6-oxa-4-azaspiro[2.4]hept-4-en-7-one (1o)**

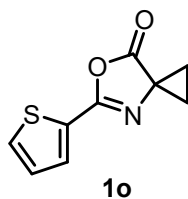

0.48 g (25%); white solid; mp = 99.6–101.8 °C;  $^1\text{H}$  NMR (400 MHz,  $\text{CDCl}_3$ )  $\delta$  7.70 (dd,  $J$  = 3.6, 1.2 Hz, 1H), 7.56 (dd,  $J$  = 4.8, 1.6 Hz, 1H), 7.15 (dd,  $J$  = 5.2, 4.0 Hz, 1H), 1.89–1.83 (m, 2H), 1.82–1.75 (m, 2H);  $^{13}\text{C}$  NMR (100 MHz,  $\text{CDCl}_3$ )  $\delta$  178.0, 157.8, 131.1, 131.0, 128.9, 128.1, 48.2, 19.7; IR (KBr)  $\nu$  3120, 3077, 1797, 1623, 1515, 1419, 1365, 1303, 1272, 1226, 1091, 1045, 964, 914, 848  $\text{cm}^{-1}$ ; HRMS (quadrupole, EI) calcd for  $\text{C}_9\text{H}_7\text{NO}_2\text{S}$   $[\text{M}]^+$  193.0197, found 193.0198.

**5-(Pyridin-4-yl)-6-oxa-4-azaspiro[2.4]hept-4-en-7-one (1p)**

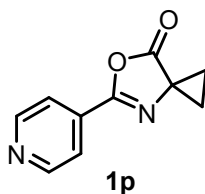

0.54 g (28%); white solid; mp = 190.5–192.7 °C;  $^1\text{H}$  NMR (400 MHz,  $\text{CDCl}_3$ )  $\delta$  8.81 (d,  $J$  = 4.8 Hz, 2H), 7.82 (d,  $J$  = 6.0 Hz, 2H), 1.99–1.93 (m, 2H), 1.91–1.86 (m, 2H);  $^{13}\text{C}$  NMR (100 MHz,  $\text{CDCl}_3$ )  $\delta$  177.5, 160.2, 150.6, 133.7, 120.8, 48.9, 20.6; IR (KBr)  $\nu$  3097, 1801, 1646, 1592, 1558, 1538, 1415, 1400, 1330, 1229, 1272, 1110, 1087, 1018, 971, 921, 867, 836  $\text{cm}^{-1}$ ; HRMS (quadrupole, EI) calcd for  $\text{C}_{10}\text{H}_8\text{N}_2\text{O}_2$   $[\text{M}]^+$  188.0586, found 188.0585.

**5-(Prop-1-en-2-yl)-6-oxa-4-azaspiro[2.4]hept-4-en-7-one (1q)**

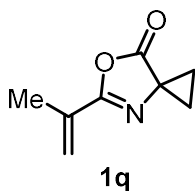

0.44 g (30%); white solid; mp = 86.6–89.2 °C; <sup>1</sup>H NMR (400 MHz, CDCl<sub>3</sub>) δ 5.97–5.96 (m, 1H), 5.63–5.62 (m, 1H), 2.03 (s, 3H), 1.83–1.77 (m, 2H), 1.76–1.71 (m, 2H); <sup>13</sup>C NMR (100 MHz, CDCl<sub>3</sub>) δ 178.4, 162.7, 131.3, 123.5, 48.5, 19.7, 17.8; IR (KBr) ν 3093, 3008, 2935, 1797, 1735, 1643, 1592, 1454, 1342, 1319, 1276, 1157, 1060, 968, 929, 867 cm<sup>-1</sup>; HRMS (quadrupole, EI) calcd for C<sub>8</sub>H<sub>9</sub>NO<sub>2</sub> [M]<sup>+</sup> 151.0633, found 151.0634.

#### 5-(Cyclohex-1-en-1-yl)-6-oxa-4-azaspiro[2.4]hept-4-en-7-one (1r)

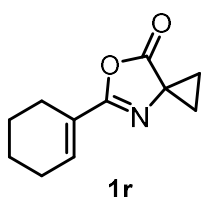

0.54 g (28%); white solid; mp = 57.2–58.5 °C; <sup>1</sup>H NMR (400 MHz, CDCl<sub>3</sub>) δ 6.81–6.78 (m, 1H), 2.33–2.29 (m, 2H), 2.27–2.22 (m, 2H), 1.77–1.74 (m, 2H), 1.72–1.62 (m, 6H); <sup>13</sup>C NMR (100 MHz, CDCl<sub>3</sub>) δ 178.7, 162.6, 137.5, 125.6, 48.0, 25.8, 23.6, 21.8, 21.6, 19.3; IR (KBr) ν 3097, 3012, 2935, 2681, 1805, 1650, 1604, 1438, 1388, 1322, 1272, 1095, 1076, 998, 975, 921, 863 cm<sup>-1</sup>; HRMS (quadrupole, EI) calcd for C<sub>11</sub>H<sub>13</sub>NO<sub>2</sub> [M]<sup>+</sup> 191.0946, found 191.0945.

#### 4-Isopropyl-2-(*p*-tolyl)oxazol-5(4*H*)-one (1s)

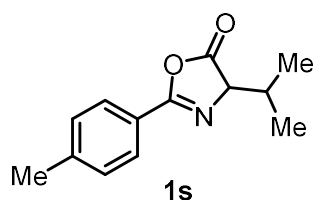

1.02 g (47%); white solid; mp = 51.1–53.8 °C; <sup>1</sup>H NMR (400 MHz, CDCl<sub>3</sub>) δ 7.92 (d, *J* = 8.0 Hz, 2H), 7.31 (d, *J* = 8.0 Hz, 2H), 4.30 (d, *J* = 4.4 Hz, 1H), 2.45 (s, 3H), 2.42–2.36 (m, 1H), 1.16 (d, *J* = 6.8 Hz, 3H), 1.04 (d, *J* = 6.8 Hz, 3H); <sup>13</sup>C NMR (100 MHz, CDCl<sub>3</sub>) δ 178.0, 161.9, 143.6, 129.6, 128.0, 123.2, 70.7, 31.4, 21.8, 18.8, 17.6; IR (KBr) ν 2965, 21927, 1877, 1820, 1650, 1616, 1511, 1461, 1411, 1322, 1295, 1245, 1180, 1145, 1041, 1014, 944, 883, 829 cm<sup>-1</sup>; HRMS (quadrupole, EI) calcd for C<sub>13</sub>H<sub>15</sub>NO<sub>2</sub> [M]<sup>+</sup> 217.1103, found 217.1103.

**4-Methyl-2-(*p*-tolyl)oxazol-5(4*H*)-one (1t)**

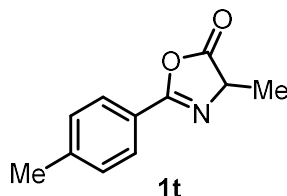

0.96 g (51%); white solid; mp = 77.8–80.2 °C; <sup>1</sup>H NMR (400 MHz, CDCl<sub>3</sub>) δ 7.87 (d, *J* = 8.4 Hz, 2H), 7.28 (d, *J* = 8.4 Hz, 2H), 4.43 (d, *J* = 7.6 Hz, 1H), 2.42 (s, 3H), 1.58 (d, *J* = 7.6 Hz, 3H); <sup>13</sup>C NMR (100 MHz, CDCl<sub>3</sub>) δ 179.3, 161.7, 143.6, 129.6, 127.9, 123.2, 61.1, 21.8, 17.1; IR (KBr) ν 3035, 2985, 2935, 1816, 1754, 1650, 1612, 1511, 1446, 1411, 1315, 1257, 1157, 1106, 1045, 995, 910, 875, 825 cm<sup>-1</sup>; HRMS (quadrupole, EI) calcd for C<sub>11</sub>H<sub>11</sub>NO<sub>2</sub> [M]<sup>+</sup> 189.0790, found 189.0787.

**2-(7-Oxo-6-oxa-4-azaspiro[2.4]hept-4-en-5-yl)phenyl acetate (5a)**

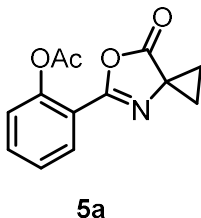

1.35 g (55%); white solid; mp = 96.8–97.0 °C; <sup>1</sup>H NMR (400 MHz, CDCl<sub>3</sub>) δ 7.98 (dd, *J* = 8.0, 1.6 Hz, 1H), 7.56 (td, *J* = 8.0, 1.6 Hz, 1H), 7.37 (td, *J* = 8.0, 1.6 Hz, 1H), 7.16 (dd, *J* = 8.0, 1.2 Hz, 1H), 2.29 (s, 3H), 1.86–1.83 (m, 2H), 1.81–1.78 (m, 2H); <sup>13</sup>C NMR (100 MHz, CDCl<sub>3</sub>) δ 177.9, 169.7, 159.0, 149.6, 133.4, 130.1, 126.5, 124.2, 119.4, 48.3, 21.2, 20.1; IR (KBr) ν 3016, 2935, 1808, 1766, 1635, 1492, 1450, 1369, 1315, 1268, 1191, 1087, 1006, 975, 914, 863, 821 cm<sup>-1</sup>; HRMS (quadrupole, EI) calcd for C<sub>13</sub>H<sub>11</sub>NO<sub>4</sub> [M]<sup>+</sup> 245.0688, found 245.0687.

**5-((8*R*,9*S*,13*S*,14*S*)-13-Methyl-17-oxo-7,8,9,11,12,13,14,15,16,17-decahydro-6*H*-cyclopenta[*a*]phenanthren-3-yl)-6-oxa-4-azaspiro[2.4]hept-4-en-7-one (5b)**

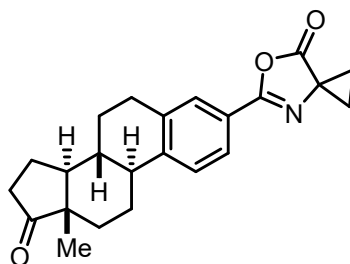

**5b**

2.21 g (61%); white solid; mp = 258.9–261.2 °C; <sup>1</sup>H NMR (400 MHz, CDCl<sub>3</sub>) δ 7.72 (d, *J* = 8.4 Hz, 2H), 7.39 (d, *J* = 8.0 Hz, 1H), 2.98–2.94 (m, 2H), 2.55–2.33 (m, 3H), 2.20–1.98 (m, 4H), 1.88–1.75 (m, 4H), 1.65–1.49 (m, 6H), 0.92 (s, 3H); <sup>13</sup>C NMR (100 MHz, CDCl<sub>3</sub>) δ 195.5, 178.7, 162.8, 144.8, 137.4, 127.8, 126.0, 124.7, 123.7, 50.6, 48.3, 48.0, 44.8, 37.9, 35.9, 31.6, 29.3, 26.3, 25.7, 21.7, 19.7, 13.9; IR (KBr) ν 2931, 2873, 1805, 1731, 1631, 1604, 1569, 1496, 1415, 1373, 1330, 1311, 1265, 1218, 1172, 1087, 1037, 1010, 971, 887, 848 cm<sup>-1</sup>; HRMS (quadrupole, EI) calcd for C<sub>23</sub>H<sub>25</sub>NO<sub>3</sub> [M]<sup>+</sup> 363.1834, found 363.1834.

**5-(4-(1-(3,5,5,8,8-Pentamethyl-5,6,7,8-tetrahydronaphthalen-2-yl)vinyl)phenyl)-6-oxa-4-azaspiro[2.4]hept-4-en-7-one (5c)**

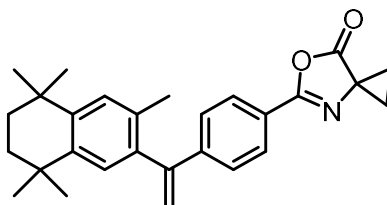

**5c**

2.32 g (56%); white solid; mp = 148.1–149.8 °C; <sup>1</sup>H NMR (400 MHz, CDCl<sub>3</sub>) δ 7.89 (d, *J* = 8.4 Hz, 2H), 7.38 (d, *J* = 8.4 Hz, 2H), 7.13 (s, 1H), 7.08 (s, 1H), 5.82 (s, 1H), 5.32 (s, 1H), 1.95 (s, 3H), 1.90–1.84 (m, 2H), 1.83–1.76 (m, 2H), 1.70 (s, 4H), 1.30 (s, 6H), 1.27 (s, 6H); <sup>13</sup>C NMR (100 MHz, CDCl<sub>3</sub>) δ 178.7, 161.8, 149.1, 145.2, 144.5, 142.5, 138.0, 132.8, 128.3, 128.2, 127.4, 127.1, 125.0, 117.0, 48.4, 35.3, 35.3, 34.1, 34.0, 32.1, 32.0, 20.1, 19.8; IR (KBr) ν 2958, 2923, 2861, 1808, 1743, 1635, 1500, 1457, 1407, 1365, 1319, 1268, 1234, 1091, 1029, 1002, 971, 910, 860 cm<sup>-1</sup>; HRMS (quadrupole, EI) calcd for C<sub>28</sub>H<sub>31</sub>NO<sub>2</sub> [M]<sup>+</sup> 413.2355, found 413.2351.

**5-(4'-((1,7'-Dimethyl-2'-propyl-1*H*,3'*H*-[2,5'-bibenzo[*d*]imidazol]-3'-yl)methyl)-[1,1'-biphenyl]-2-yl)-6-oxa-4-azaspiro[2.4]hept-4-en-7-one (5d)**

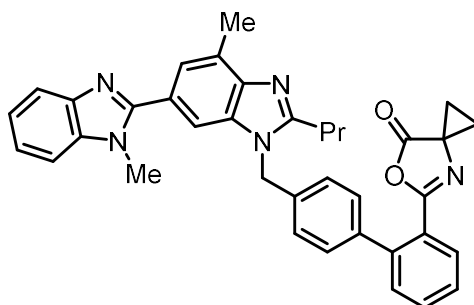

**5d**

2.49 mg (43%); white solid; mp = 95.9–98.2 °C; <sup>1</sup>H NMR (400 MHz, CDCl<sub>3</sub>) δ 7.84–7.81 (m, 2H), 7.55–7.51 (m, 2H), 7.45–7.41 (m, 2H), 7.38–7.29 (m, 4H), 7.27–7.25 (m, 2H), 7.08 (d, *J* = 8.0 Hz, 2H), 5.46 (s, 2H), 3.83 (s, 3H), 2.94 (t, *J* = 8.0 Hz, 2H), 2.77 (s, 3H), 1.92–1.83 (m, 2H), 1.61–1.48 (m, 4H), 1.05 (t, *J* = 7.2 Hz, 3H); <sup>13</sup>C NMR (100 MHz, CDCl<sub>3</sub>) δ 178.2, 162.5, 156.7, 154.5, 141.6, 140.4, 136.6, 135.2, 131.7, 131.2, 131.1, 130.0, 129.7, 129.6, 129.4, 127.8, 126.1, 125.6, 123.9, 122.8, 122.7, 119.4, 109.7, 109.3, 47.9, 47.2, 32.0, 30.0, 22.0, 19.3, 17.0, 14.2; IR (KBr) ν 3043, 2962, 2873, 1805, 1739, 1639, 1511, 1450, 1407, 1319, 1272, 1157, 1091, 1056, 1002, 971, 914, 860 cm<sup>-1</sup>; HRMS (quadrupole, EI) calcd for C<sub>37</sub>H<sub>33</sub>N<sub>5</sub>O<sub>2</sub> [M]<sup>+</sup> 579.2634, found 579.2629.

**(*S*)-2-(3-Ethoxy-4-(7-oxo-6-oxa-4-azaspiro[2.4]hept-4-en-5-yl)phenyl)-*N*-(3-methyl-1-(2-(piperidin-1-yl)phenyl)butyl)acetamide (5e)**

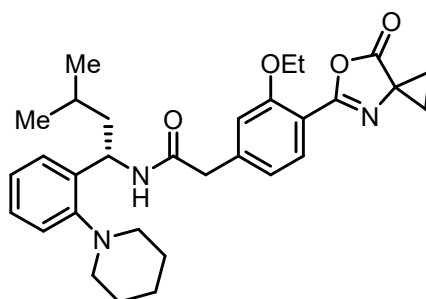

**5e**

2.12 g (41%); brown solid; mp = 149.7–150.6 °C; <sup>1</sup>H NMR (400 MHz, CDCl<sub>3</sub>) δ 7.73 (d, *J* = 8.0 Hz, 1H), 7.23–7.17 (m, 2H), 7.08–7.03 (m, 2H), 6.90–6.88 (m, 2H), 6.73 (d, *J* = 8.8 Hz, 1H), 5.37 (q, *J* = 8.4 Hz, 1H), 4.10–4.01 (m, 2H), 3.55 (s, 2H), 2.92 (s, 2H), 2.62 (s, 2H), 1.90–1.83 (m, 2H), 1.82–1.75 (m, 2H), 1.73–1.70 (m, 2H), 1.62–1.50 (m, 2H), 1.40 (t, *J* = 6.8 Hz, 4H), 0.91 (d, *J* = 6.8 Hz, 6H); <sup>13</sup>C NMR (100 MHz, CDCl<sub>3</sub>) δ 179.0, 168.7, 160.6, 158.4, 152.6, 141.3, 138.7, 131.1, 128.1, 127.8, 125.2, 123.0, 121.3, 114.7, 114.0, 64.9, 50.0, 48.2, 46.8, 44.4, 26.9, 25.4, 24.2, 22.9, 22.6, 19.8, 14.6; IR (KBr) ν 3293, 2931, 2865, 2800, 1801, 1639, 1535, 1492, 1430, 1384, 1303, 1268, 1253, 1168, 1103, 1037, 1002, 975, 917, 860 cm<sup>-1</sup>; HRMS (quadrupole, FAB) calcd for C<sub>31</sub>H<sub>40</sub>N<sub>3</sub>O<sub>4</sub> [M+H]<sup>+</sup> 518.3019, found 518.3019.



## General procedure and characterization data for the amidation of 2-aryl azlactones using acyl azides (**3a–3t**, **4b–4k**, and **6a–6e**)

To an oven-dried sealed tube charged with 2-aryl azlactones (0.2 mmol, 100 mol %), [IrCp\*Cl<sub>2</sub>]<sub>2</sub> (4.0 mg, 0.005 mmol, 2.5 mol %), AgNTf<sub>2</sub> (7.8 mg, 0.02 mmol, 10 mol %), LiOAc (4.0 mg, 0.06 mmol, 30 mol %), and acyl azides (0.3 mmol, 150 mol %) was added DCE (1 mL) under air at room temperature. The reaction mixture was allowed to stir at 50 °C for 24 h. The reaction mixture was cooled to room temperature, diluted with EtOAc (3 mL) and concentrated in vacuo. The residue was purified by flash column chromatography (*n*-hexane:EtOAc) to afford the corresponding products **3a–3t**, **4b–4k**, and **6a–6e**.

### *N*-(5-Methyl-2-(7-oxo-6-oxa-4-azaspiro[2.4]hept-4-en-5-yl)phenyl)benzamide (**3a**)

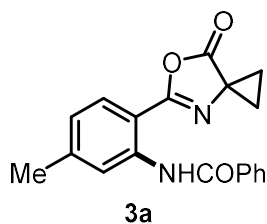

54.6 mg (85%); white solid; mp = 140.7–141.7 °C; <sup>1</sup>H NMR (400 MHz, CDCl<sub>3</sub>) δ 11.92 (s, 1H), 8.82 (s, 1H), 7.93 (d, *J* = 7.2 Hz, 2H), 7.79 (d, *J* = 8.0 Hz, 1H), 7.54 (t, *J* = 7.6 Hz, 1H), 7.45 (t, *J* = 7.6 Hz, 2H), 6.99 (d, *J* = 8.4 Hz, 1H), 2.45 (s, 3H), 1.86 (s, 4H); <sup>13</sup>C NMR (100 MHz, CDCl<sub>3</sub>) δ 176.6, 166.0, 162.7, 145.2, 140.2, 135.2, 132.1, 128.8, 128.7, 127.5, 124.1, 120.8, 109.3, 47.6, 22.4, 20.0; IR (KBr) ν 3232, 3104, 2923, 1812, 1677, 1619, 1577, 1542, 1500, 1446, 1415, 1326, 1268, 1191, 1157, 1106, 1079, 1006, 979, 925, 890, 856, 821 cm<sup>-1</sup>; HRMS (quadrupole, EI) calcd for C<sub>19</sub>H<sub>16</sub>N<sub>2</sub>O<sub>3</sub> [M]<sup>+</sup> 320.1161, found 320.1163.

### *N*-(5-Chloro-2-(7-oxo-6-oxa-4-azaspiro[2.4]hept-4-en-5-yl)phenyl)benzamide (**3b**)

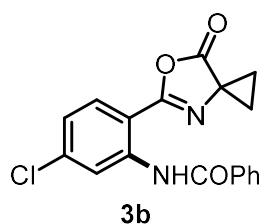

62.8 mg (92%); white solid; mp = 215.2–216.8 °C; <sup>1</sup>H NMR (700 MHz, CDCl<sub>3</sub>) δ 11.98 (s, 1H), 9.06 (d, *J* = 2.1 Hz, 1H), 7.90 (d, *J* = 7.0 Hz, 2H), 7.81 (d, *J* = 8.4 Hz, 1H), 7.55 (t, *J* = 7.0 Hz, 1H), 7.46 (t, *J* = 8.4 Hz, 2H), 7.14 (dd, *J* = 8.4, 2.1 Hz, 1H), 1.90–1.85 (m, 2H), 1.93–1.88 (m, 4H); <sup>13</sup>C NMR (175 MHz, CDCl<sub>3</sub>) δ 175.8, 166.0, 162.1, 141.0, 140.2, 134.7, 132.3, 129.8, 128.8, 127.5, 123.3, 120.4, 110.1, 47.7, 20.2; IR (KBr) ν 3178, 3116, 3085, 2923, 1816, 1677, 1616, 1577, 1531, 1496, 1411, 1322, 1276, 1245, 1103, 1076, 1006, 975, 921, 852 cm<sup>-1</sup>; HRMS (quadrupole, EI) calcd for C<sub>18</sub>H<sub>13</sub>ClN<sub>2</sub>O<sub>3</sub> [M]<sup>+</sup> 340.0615, found 340.0615.

***N*-(2-(7-Oxo-6-oxa-4-azaspiro[2.4]hept-4-en-5-yl)-5-(trifluoromethyl)phenyl)benzamide (3c)**

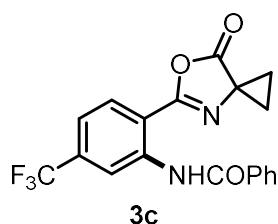

60.7 mg (81%); white solid; mp = 185.4–187.7 °C; <sup>1</sup>H NMR (700 MHz, CDCl<sub>3</sub>) δ 12.04 (s, 1H), 9.35 (s, 1H), 8.03 (d, *J* = 8.4 Hz, 1H), 7.92 (d, *J* = 7.0 Hz, 2H), 7.56 (t, *J* = 7.0 Hz, 1H), 7.47 (t, *J* = 8.4 Hz, 2H), 7.42 (d, *J* = 7.7 Hz, 1H), 1.98–1.96 (m, 2H), 1.95–1.94 (m, 2H); <sup>13</sup>C NMR (175 MHz, CDCl<sub>3</sub>) δ 175.5, 166.1, 161.9, 140.6, 135.2 (q, *J*<sub>C-F</sub> = 3.9 Hz), 134.6, 132.5, 129.5, 128.8, 127.5, 123.4 (q, *J*<sub>C-F</sub> = 270.9 Hz), 119.4 (q, *J*<sub>C-F</sub> = 3.9 Hz), 117.4 (q, *J*<sub>C-F</sub> = 3.9 Hz), 114.2, 47.9, 20.5; IR (KBr) ν 3131, 3062, 2923, 2854, 1816, 1670, 1612, 1581, 1550, 1504, 1423, 1322, 1280, 1226, 1172, 1133, 1072, 1002, 917, 894, 833 cm<sup>-1</sup>; HRMS (quadrupole, EI) calcd for C<sub>19</sub>H<sub>13</sub>F<sub>3</sub>N<sub>2</sub>O<sub>3</sub> [M]<sup>+</sup> 374.0878, found 374.0879.

***N*-(2-(7-Oxo-6-oxa-4-azaspiro[2.4]hept-4-en-5-yl)phenyl)benzamide (3d)**

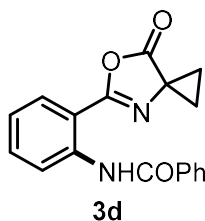

47.8 mg (78%); white solid; mp = 165.9–167.1 °C; <sup>1</sup>H NMR (700 MHz, CDCl<sub>3</sub>) δ 11.98 (s, 1H), 8.99 (d, *J* = 8.4 Hz, 1H), 7.96–7.84 (m, 3H), 7.60 (t, *J* = 8.4 Hz, 1H), 7.56 (t, *J* = 7.7 Hz, 1H), 7.48 (t, *J* = 8.4 Hz, 2H), 7.20 (t, *J* = 7.7 Hz, 1H), 1.93–1.91 (m, 2H), 1.90–1.88 (m, 2H); <sup>13</sup>C NMR (175 MHz, CDCl<sub>3</sub>) δ 176.3, 166.1, 162.7, 140.3, 135.2, 134.0, 132.1, 129.0, 128.7, 127.5, 123.1, 120.4, 111.9, 47.8, 20.1; IR (KBr) ν 3255, 2923, 2854, 1816, 1677, 1616, 1585, 1546, 1500, 1450, 1299, 1268, 1168, 1106, 1083, 1006, 925, 871 cm<sup>-1</sup>; HRMS (quadrupole, EI) calcd for C<sub>18</sub>H<sub>14</sub>N<sub>2</sub>O<sub>3</sub> [M]<sup>+</sup> 306.1004, found 306.1002.

***N*-(4-Methyl-2-(7-oxo-6-oxa-4-azaspiro[2.4]hept-4-en-5-yl)phenyl)benzamide (3e)**

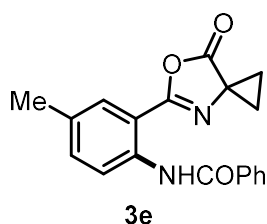

55.8 mg (87%); white solid; mp = 206.5–207.5 °C; <sup>1</sup>H NMR (400 MHz, CDCl<sub>3</sub>) δ 11.65 (s, 1H), 8.66 (d, *J* = 8.8 Hz, 1H), 7.74–7.71 (m, 2H), 7.52 (s, 1H), 7.35–7.31 (m, 1H), 7.26 (t, *J* = 7.6 Hz, 2H), 7.19 (d, *J* = 8.4 Hz, 1H), 2.18 (s, 3H), 1.70–1.68 (m, 4H); <sup>13</sup>C NMR (100 MHz, CDCl<sub>3</sub>) δ 176.4, 165.7, 162.6, 137.9, 135.2, 134.6, 132.7, 131.9, 129.0, 128.6, 127.4, 120.3, 111.6, 47.7, 20.8, 20.1; IR (KBr) ν 3112, 2919, 2854, 1808, 1731, 1677, 1612, 1538, 1500, 1454, 1407, 1303, 1268, 1203, 1079, 1033, 975, 917, 840 cm<sup>-1</sup>; HRMS (quadrupole, EI) calcd for C<sub>19</sub>H<sub>16</sub>N<sub>2</sub>O<sub>3</sub> [M]<sup>+</sup> 320.1161, found 320.1160.

***N*-(4-Chloro-2-(7-oxo-6-oxa-4-azaspiro[2.4]hept-4-en-5-yl)phenyl)benzamide (3f)**

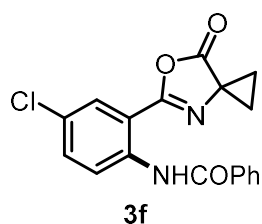

53.2 mg (78%); white solid; mp = 205.8–206.1 °C; <sup>1</sup>H NMR (400 MHz, CDCl<sub>3</sub>) δ 11.89 (s, 1H), 8.96 (d, *J* = 8.8 Hz, 1H), 7.92–7.90 (m, 3H), 7.58–7.45 (m, 4H), 1.96–1.89 (m, 4H); <sup>13</sup>C NMR (100 MHz, CDCl<sub>3</sub>) δ 175.7, 165.9, 161.7, 138.8, 134.8, 133.7, 132.3, 128.8, 128.5, 128.2, 127.5, 121.8, 113.0, 47.9, 20.4; IR (KBr) ν 3170, 3106, 3023, 2911, 1809, 1657, 1601, 1595, 1566, 1480, 1401, 1392, 1302, 1216, 1183, 1176, 1096, 978, 925, 849 cm<sup>-1</sup>; HRMS (quadrupole, EI) calcd for C<sub>18</sub>H<sub>13</sub>ClN<sub>2</sub>O<sub>3</sub> [M]<sup>+</sup> 340.0615, found 340.0612.

***N*-(4-Bromo-2-(7-oxo-6-oxa-4-azaspiro[2.4]hept-4-en-5-yl)phenyl)benzamide (3g)**

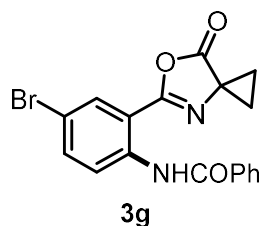

54.8 mg (71%); white solid; mp = 242.3–243.8 °C; <sup>1</sup>H NMR (700 MHz, CDCl<sub>3</sub>) δ 11.89 (s, 1H), 8.91 (d, *J* = 8.4 Hz, 1H), 8.05 (d, *J* = 2.1 Hz, 1H), 7.91 (d, *J* = 7.0 Hz, 2H), 7.67 (dd, *J* = 8.4, 2.1 Hz, 1H), 7.56 (t, *J* = 7.0 Hz, 1H), 7.47 (t, *J* = 8.4 Hz, 2H), 1.95–1.90 (m, 4H); <sup>13</sup>C NMR (175 MHz, CDCl<sub>3</sub>) δ 175.6, 166.0, 161.7, 139.3, 136.6, 134.9, 132.3, 131.4, 128.8, 127.5, 122.0, 115.5, 113.4, 47.9, 20.3; IR (KBr) ν 3112, 2923, 2854, 1816, 1727, 1681, 1612, 1573, 1527, 1496, 1388, 1295, 1257, 1099, 1076, 1014, 975, 921, 879, 840 cm<sup>-1</sup>; HRMS (quadrupole, EI) calcd for C<sub>18</sub>H<sub>13</sub>BrN<sub>2</sub>O<sub>3</sub> [M]<sup>+</sup> 384.0110, found 384.0108.

***N*-(3-Methyl-2-(7-oxo-6-oxa-4-azaspiro[2.4]hept-4-en-5-yl)phenyl)benzamide (3h)**

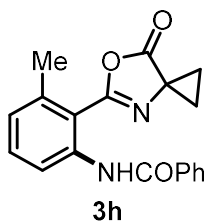

58.4 mg (91%); white solid; mp = 164.4–165.5 °C; <sup>1</sup>H NMR (400 MHz, CDCl<sub>3</sub>) δ 11.52 (s, 1H), 8.62 (d, *J* = 8.0 Hz, 1H), 7.84 (d, *J* = 7.2 Hz, 2H), 7.50 (t, *J* = 7.2 Hz, 1H), 7.44–7.37 (m, 3H), 6.98 (d, *J* = 7.2 Hz, 1H) 2.56 (s, 3H), 1.84 (s, 4H); <sup>13</sup>C NMR (100 MHz, CDCl<sub>3</sub>) δ 176.8, 165.6, 163.1, 139.7, 139.6, 135.3, 132.6, 132.0, 128.7, 127.3, 126.9, 118.9, 113.3, 46.8, 23.2, 20.1; IR (KBr) ν 3070, 2981, 2931, 1812, 1724, 1670, 1600, 1550, 1492, 1454, 1326, 1292, 1253, 1184, 1114, 1091, 1033, 1002, 983, 921, 867 cm<sup>-1</sup>; HRMS (quadrupole, EI) calcd for C<sub>19</sub>H<sub>16</sub>N<sub>2</sub>O<sub>3</sub> [M]<sup>+</sup> 320.1161, found 320.1161.

***N*-(3-Fluoro-2-(7-oxo-6-oxa-4-azaspiro[2.4]hept-4-en-5-yl)phenyl)benzamide (3i)**

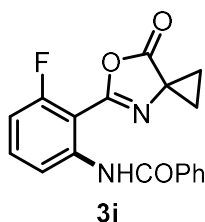

41.6 mg (64%); white solid; mp = 176.0–178.5 °C; <sup>1</sup>H NMR (400 MHz, CDCl<sub>3</sub>) δ 11.96 (s, 1H), 8.75 (d, *J* = 8.8 Hz, 1H), 7.90 (d, *J* = 7.6 Hz, 2H), 7.57–7.46 (m, 4H), 6.95–6.91 (m, 1H), 1.93–1.90 (m, 4H); <sup>13</sup>C NMR (100 MHz, CDCl<sub>3</sub>) δ 176.3, 166.0, 161.6 (d, *J*<sub>C-F</sub> = 258.1 Hz), 160.9, 141.1, 135.0, 134.6 (d, *J*<sub>C-F</sub> = 10.5 Hz), 132.3, 128.8, 127.5, 116.3 (d, *J*<sub>C-F</sub> = 3.6 Hz), 111.1 (d, *J*<sub>C-F</sub> = 22.1 Hz), 102.2, 46.6, 20.2; IR (KBr) ν 3247, 3097, 2927, 1812, 1731, 1677, 1608, 1581, 1550, 1465, 1299, 1268, 1184, 1110, 1076, 1006, 979, 925, 867 cm<sup>-1</sup>; HRMS (quadrupole, EI) calcd for C<sub>18</sub>H<sub>13</sub>FN<sub>2</sub>O<sub>3</sub> [M]<sup>+</sup> 324.0910, found 324.0906.

***N*-(3-(7-Oxo-6-oxa-4-azaspiro[2.4]hept-4-en-5-yl)naphthalen-2-yl)benzamide (3j)**

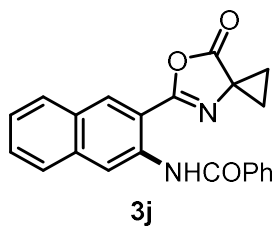

56.3 mg (79%); white solid; mp = 210.6–211.4 °C;  $^1\text{H}$  NMR (400 MHz,  $\text{CDCl}_3$ )  $\delta$  11.9 (s, 1H), 9.43 (s, 1H), 7.98 (d,  $J = 7.6$  Hz, 2H), 7.88 (dd,  $J = 13.6, 8.4$  Hz, 2H), 7.62–7.54 (m, 2H), 7.51–7.44 (m, 3H), 1.94 (s, 4H);  $^{13}\text{C}$  NMR (100 MHz,  $\text{CDCl}_3$ )  $\delta$  176.1, 166.0, 162.6, 136.1, 135.4, 135.2, 132.0, 131.2, 129.4, 128.9, 128.7, 128.7, 128.0, 127.4, 126.0, 117.7, 112.5, 48.0, 20.2; IR (KBr)  $\nu$  3262, 3104, 3058, 2923, 1816, 1677, 1631, 1604, 1550, 1484, 1442, 1361, 1334, 1307, 1272, 1076, 991, 921, 894, 752  $\text{cm}^{-1}$ ; HRMS (quadrupole, EI) calcd for  $\text{C}_{22}\text{H}_{16}\text{N}_2\text{O}_3$   $[\text{M}]^+$  356.1161, found 356.1157.

***N*-(1-(7-Oxo-6-oxa-4-azaspiro[2.4]hept-4-en-5-yl)pyren-2-yl)benzamide (3k)**

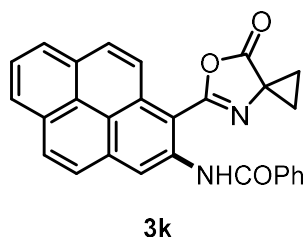

44.0 mg (51%); yellow solid; mp = 181.4–182.5 °C;  $^1\text{H}$  NMR (400 MHz,  $\text{CDCl}_3$ )  $\delta$  11.77 (s, 1H), 9.56 (s, 1H), 8.62 (d,  $J = 9.6$  Hz, 1H), 8.20–7.96 (m, 8H), 7.61–7.51 (m, 3H), 2.00–1.98 (m, 4H);  $^{13}\text{C}$  NMR (100 MHz,  $\text{CDCl}_3$ )  $\delta$  177.0, 165.8, 163.2, 137.0, 135.4, 134.8, 132.3, 132.2, 131.0, 130.7, 130.5, 129.7, 128.8, 127.6, 127.4, 126.9, 126.6, 126.2, 124.8, 123.9, 121.4, 117.4, 107.7, 47.3, 20.4; IR (KBr)  $\nu$  3050, 2923, 2854, 1816, 1724, 1681, 1596, 1558, 1469, 1376, 1330, 1299, 1268, 1184, 1095, 1072, 1002, 921, 879, 829  $\text{cm}^{-1}$ ; HRMS (quadrupole, EI) calcd for  $\text{C}_{28}\text{H}_{18}\text{N}_2\text{O}_3$   $[\text{M}]^+$  430.1317, found 430.1314.

***N*-(6-(7-Oxo-6-oxa-4-azaspiro[2.4]hept-4-en-5-yl)benzo[*d*][1,3]dioxol-5-yl)benzamide (3l)**

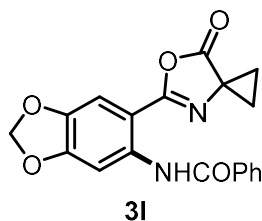

53.3 mg (76%); white solid; mp = 174.1–176.0 °C; <sup>1</sup>H NMR (400 MHz, CDCl<sub>3</sub>) δ 10.76 (s, 1H), 7.95 (d, *J* = 7.6 Hz, 2H), 7.56–7.44 (m, 4H), 6.76 (d, *J* = 8.4 Hz, 1H), 6.14 (s, 2H), 1.79–1.70 (m, 4H); <sup>13</sup>C NMR (100 MHz, CDCl<sub>3</sub>) δ 176.6, 164.0, 161.7, 152.5, 141.1, 133.6, 132.3, 128.7, 127.7, 124.4, 121.5, 110.7, 105.1, 102.4, 47.7, 19.8; IR (KBr) ν 3282, 3062, 2904, 1812, 1689, 1635, 1600, 1527, 1465, 1303, 1268, 1160, 1114, 1049, 1025, 979, 925, 875 cm<sup>-1</sup>; HRMS (quadrupole, EI) calcd for C<sub>19</sub>H<sub>14</sub>N<sub>2</sub>O<sub>5</sub> [M]<sup>+</sup> 350.0903, found 350.0901.

***N*-(1-Methyl-5-(7-oxo-6-oxa-4-azaspiro[2.4]hept-4-en-5-yl)-1H-indol-6-yl)benzamide (3m)**

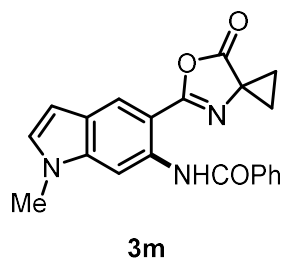

36.7 mg (51%); white solid; mp = 233.5–235.1 °C; <sup>1</sup>H NMR (500 MHz, CDCl<sub>3</sub>) δ 12.21 (s, 1H), 9.04 (s, 1H), 8.24 (s, 1H), 7.99 (d, *J* = 7.0 Hz, 2H), 7.54 (t, *J* = 7.5 Hz, 1H), 7.47 (t, *J* = 7.5 Hz, 2H), 7.09 (d, *J* = 3.0 Hz, 1H), 6.54 (d, *J* = 3.0 Hz, 1H), 3.82 (s, 3H), 1.87–1.84 (m, 4H); <sup>13</sup>C NMR (125 MHz, CDCl<sub>3</sub>) δ 146.8, 165.9, 163.5, 139.2, 134.6, 131.8, 130.9, 128.6, 127.4, 123.9, 123.1, 120.5, 105.7, 102.6, 101.1, 47.6, 33.2, 19.6; IR (KBr) ν 3239, 3104, 2923, 1808, 1735, 1700, 1666, 1604, 1535, 1461, 1376, 1353, 1303, 1268, 1180, 1079, 979, 921, 860 cm<sup>-1</sup>; HRMS (quadrupole, EI) calcd for C<sub>21</sub>H<sub>17</sub>N<sub>3</sub>O<sub>3</sub> [M]<sup>+</sup> 359.1270, found 359.1270.

***N*-(3-(7-Oxo-6-oxa-4-azaspiro[2.4]hept-4-en-5-yl)furan-2-yl)benzamide (3n)**

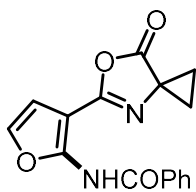

**3n**

16.1 mg (38%); white solid; mp = 153.8–155.1 °C; <sup>1</sup>H NMR (400 MHz, CDCl<sub>3</sub>) δ 9.12 (s, 1H), 8.06 (s, 1H), 7.50–7.46 (m, 2H), 7.30 (t, *J* = 8.0 Hz, 2H), 7.08 (t, *J* = 7.6 Hz, 1H), 6.72 (s, 1H), 1.66–1.61 (m, 2H), 1.14–1.09 (m, 2H); <sup>13</sup>C NMR (100 MHz, CDCl<sub>3</sub>) δ 169.7, 164.8, 164.8, 145.9, 144.3, 138.0, 129.0, 124.5, 121.7, 120.2, 108.4, 36.6, 16.3; IR (KBr) ν 3293, 2923, 2854, 1646, 1596, 1504, 1438, 1326, 1238, 1168, 1079, 1018, 941, 875, 825 cm<sup>-1</sup>; HRMS (quadrupole, EI) calcd for C<sub>21</sub>H<sub>18</sub>N<sub>2</sub>O<sub>5</sub> [M]<sup>+</sup> 296.0797, found 296.0796.

***N*-(2-(7-Oxo-6-oxa-4-azaspiro[2.4]hept-4-en-5-yl)thiophen-3-yl)benzamide (3o)**

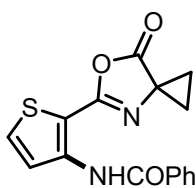

**3o**

28.8 mg (46%); white solid; mp = 209.6–211.9 °C; <sup>1</sup>H NMR (400 MHz, CDCl<sub>3</sub>) δ 11.13 (s, 1H), 8.34 (d, *J* = 5.2 Hz, 1H), 7.93 (d, *J* = 7.2 Hz, 2H), 7.60–7.47 (m, 4H), 1.85 (s, 4H); <sup>13</sup>C NMR (100 MHz, CDCl<sub>3</sub>) δ 176.3, 164.5, 159.2, 143.1, 134.0, 132.4, 130.7, 128.9, 127.5, 122.9, 106.9, 47.5, 19.9; IR (KBr) ν 3729, 3698, 3625, 3598, 2919, 1805, 1673, 1608, 1581, 1407, 1292, 1234, 1087, 971, 890 cm<sup>-1</sup>; HRMS (quadrupole, EI) calcd for C<sub>16</sub>H<sub>12</sub>N<sub>2</sub>O<sub>3</sub>S [M]<sup>+</sup> 312.0569, found 312.0566.

***(Z)*-N-(2-(7-Oxo-6-oxa-4-azaspiro[2.4]hept-4-en-5-yl)prop-1-en-1-yl)benzamide (3q)**



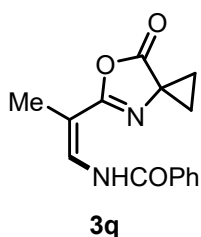

27.5 mg (51%); white solid; mp = 148.6–151.5 °C; <sup>1</sup>H NMR (400 MHz, CDCl<sub>3</sub>) δ 11.39 (d, *J* = 11.2 Hz, 1H), 7.84 (dd, *J* = 8.4, 1.2 Hz, 2H), 7.62–7.59 (m, 1H), 7.56 (dt, *J* = 7.2, 1.6 Hz, 1H), 7.50–7.46 (m, 2H), 2.03 (d, *J* = 1.2 Hz, 3H), 1.83–1.80 (m, 4H); <sup>13</sup>C NMR (100 MHz, CDCl<sub>3</sub>) δ 177.3, 164.5, 164.2, 132.9, 132.7, 132.4, 128.9, 127.6, 101.1, 47.4, 20.0, 15.6; IR (KBr) ν 3243, 3066, 2923, 2854, 1805, 1677, 1646, 1577, 1527, 1488, 1446, 1357, 1322, 1280, 1241, 1203, 1160, 1052, 979, 925, 890, 852 cm<sup>-1</sup>; HRMS (quadrupole, EI) calcd for C<sub>15</sub>H<sub>14</sub>N<sub>2</sub>O<sub>3</sub> [M]<sup>+</sup> 270.1004, found 270.1001.

***N*-(2-(7-Oxo-6-oxa-4-azaspiro[2.4]hept-4-en-5-yl)cyclohexan-1-yl)benzamide (3r)**

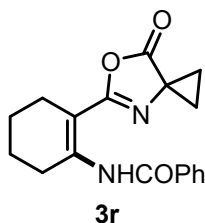

27.2 mg (44%); white solid; mp = 164.9–166.9 °C; <sup>1</sup>H NMR (400 MHz, CDCl<sub>3</sub>) δ 12.15 (s, 1H), 7.87 (d, *J* = 7.2 Hz, 2H), 7.53 (dt, *J* = 7.2, 1.6 Hz, 1H), 7.43 (t, *J* = 8.0 Hz, 2H), 3.19–3.15 (m, 2H), 2.48–2.44 (m, 2H), 1.80–1.77 (m, 2H), 1.75–1.68 (m, 6H); <sup>13</sup>C NMR (100 MHz, CDCl<sub>3</sub>) δ 177.5, 165.6, 164.3, 149.4, 135.1, 132.1, 128.6, 127.8, 101.2, 47.1, 28.6, 24.0, 21.9, 21.6, 19.6; IR (KBr) ν 2935, 2857, 1805, 1681, 1631, 1581, 1531, 1492, 1268, 1184, 1160, 1079, 1029, 991, 925, 898, 856 cm<sup>-1</sup>; HRMS (quadrupole, EI) calcd for C<sub>18</sub>H<sub>18</sub>N<sub>2</sub>O<sub>3</sub> [M]<sup>+</sup> 310.1317, found 310.1315.

***N*-(2-(4-Isopropyl-5-oxo-4,5-dihydrooxazol-2-yl)-5-methylphenyl)benzamide (3s)**

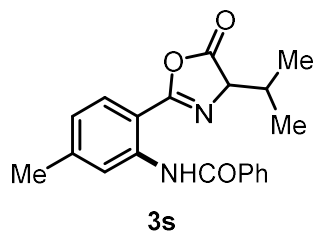

43.8 mg (65%); white solid; mp = 102.6–105.2 °C; <sup>1</sup>H NMR (400 MHz, CDCl<sub>3</sub>) δ 12.30 (s, 1H), 8.88 (s, 1H), 8.05 (d, *J* = 8.8 Hz, 2H), 7.79 (d, *J* = 8.0 Hz, 1H), 7.56 (t, *J* = 7.2 Hz, 1H), 7.48 (t, *J* = 8.0 Hz, 2H), 7.00 (d, *J* = 8.0 Hz, 1H), 4.42 (d, *J* = 4.8 Hz, 1H), 2.47–2.40 (m, 4H), 1.21 (d, *J* = 6.8 Hz, 3H), 0.98 (d, *J* = 6.8 Hz, 3H); <sup>13</sup>C NMR (100 MHz, CDCl<sub>3</sub>) δ 175.7, 166.2, 163.1, 145.6, 140.9, 135.1, 132.1, 129.7, 128.7, 127.7, 124.0, 120.9, 108.7, 70.3, 31.5, 22.4, 19.5, 17.5; IR (KBr) ν 3235, 2965, 2923, 1828, 1681, 1627, 1581, 1542, 1450, 1419, 1334, 1280, 1180, 1130, 1095, 1033, 944, 871, 821 cm<sup>-1</sup>; HRMS (quadrupole, EI) calcd for C<sub>20</sub>H<sub>20</sub>N<sub>2</sub>O<sub>3</sub> [M]<sup>+</sup> 336.1474, found 336.1469.

***N*-(5-Methyl-2-(4-methyl-5-oxo-4,5-dihydrooxazol-2-yl)phenyl)benzamide (3t)**

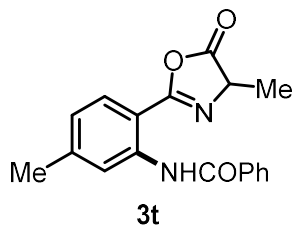

26.0 mg (42%); white solid; mp = 103.1–105.7 °C; <sup>1</sup>H NMR (400 MHz, CDCl<sub>3</sub>) δ 12.23 (s, 1H), 8.84 (s, 1H), 8.02 (d, *J* = 7.6 Hz, 2H), 7.75 (d, *J* = 8.0 Hz, 1H), 7.55–7.46 (m, 3H), 6.98 (d, *J* = 8.0 Hz, 1H), 4.57 (q, *J* = 7.6 Hz, 1H), 2.44 (s, 3H), 1.63 (d, *J* = 7.6 Hz, 3H); <sup>13</sup>C NMR (100 MHz, CDCl<sub>3</sub>) δ 176.9, 166.1, 162.8, 145.6, 140.8, 135.1, 132.1, 129.6, 128.8, 127.7, 124.0, 120.9, 108.8, 60.4, 22.4, 17.2; IR (KBr) ν 3232, 3112, 2927, 2857, 1824, 1681, 1627, 1581, 1542, 1446, 1419, 1322, 1276, 1172, 1145, 1110, 998, 917, 890, 863 cm<sup>-1</sup>; HRMS (quadrupole, EI) calcd for C<sub>18</sub>H<sub>16</sub>N<sub>2</sub>O<sub>3</sub> [M]<sup>+</sup> 308.1161, found 308.1160.

**4-Methyl-*N*-(5-methyl-2-(7-oxo-6-oxa-4-azaspiro[2.4]hept-4-en-5-yl)phenyl)benzamide (4b)**

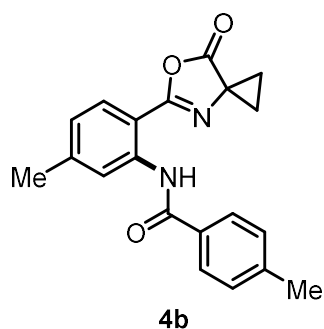

56.9 mg (85%); white solid; mp = 225.6–227.3 °C; <sup>1</sup>H NMR (400 MHz, CDCl<sub>3</sub>) δ 11.85 (s, 1H), 11.80 (s, 1H), 7.80 (d, *J* = 8.0 Hz, 2H), 7.75 (d, *J* = 8.0 Hz, 1H), 7.24–7.22 (m, 2H), 6.95 (d, *J* = 8.0 Hz, 1H), 2.42 (s, 3H), 2.39 (s, 3H), 1.85–1.83 (m, 4H); <sup>13</sup>C NMR (100 MHz, CDCl<sub>3</sub>) δ 176.5, 165.9, 162.6, 145.1, 142.6, 140.3, 132.4, 129.3, 128.8, 127.5, 123.9, 120.7, 109.2, 47.6, 22.3, 21.6, 19.9; IR (KBr) ν 3259, 2919, 2861, 1812, 1735, 1666, 1619, 1577, 1546, 1511, 1415, 1322, 1272, 1187, 1087, 1006, 975, 921, 887, 856 cm<sup>-1</sup>; HRMS (quadrupole, EI) calcd for C<sub>20</sub>H<sub>18</sub>N<sub>2</sub>O<sub>3</sub> [M]<sup>+</sup> 334.1317, found 334.1318.

**4-Methoxy-*N*-(5-methyl-2-(7-oxo-6-oxa-4-azaspiro[2.4]hept-4-en-5-yl)phenyl)benzamide (4c)**

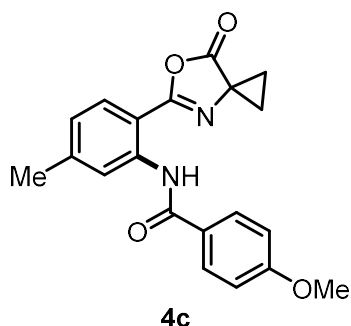

60.3 mg (86%); white solid; mp = 225.6–227.3 °C; <sup>1</sup>H NMR (400 MHz, CDCl<sub>3</sub>) δ 11.83 (s, 1H), 8.82 (s, 1H), 7.91 (d, *J* = 8.8 Hz, 2H), 7.80 (d, *J* = 8.0 Hz, 1H), 7.00–6.94 (m, 3H), 3.88 (s, 3H), 2.45 (s, 3H), 1.89–1.87 (m, 4H); <sup>13</sup>C NMR (100 MHz, CDCl<sub>3</sub>) δ 176.6, 165.6, 162.7, 162.7, 145.1, 140.4, 129.4, 128.8, 127.5, 123.8, 120.7, 113.9, 109.2, 55.6, 47.7, 22.4, 19.9; IR (KBr) ν 3262, 2923, 2854, 1805, 1666, 1616, 1581, 1511, 1415, 1322, 1257, 1184, 1087, 1006, 975, 925, 887, 856 cm<sup>-1</sup>; HRMS (quadrupole, EI) calcd for C<sub>20</sub>H<sub>18</sub>N<sub>2</sub>O<sub>4</sub> [M]<sup>+</sup> 350.1267, found 350.1268.

***N*-(5-Methyl-2-(7-oxo-6-oxa-4-azaspiro[2.4]hept-4-en-5-yl)phenyl)-4-(trifluoromethyl)benzamide (4d)**

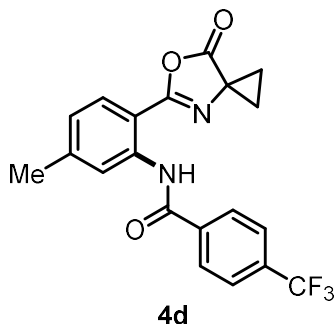

49.8 mg (64%); white solid; mp = 178.3–180.2 °C;  $^1\text{H}$  NMR (400 MHz,  $\text{CDCl}_3$ )  $\delta$  12.03 (s, 1H), 8.80 (s, 1H), 8.05 (d,  $J = 8.0$  Hz, 2H), 7.83 (d,  $J = 8.0$  Hz, 1H), 7.74 (d,  $J = 8.4$  Hz, 2H), 7.05 (d,  $J = 8.8$  Hz, 1H), 2.47 (s, 3H), 1.93–1.84 (m, 4H);  $^{13}\text{C}$  NMR (100 MHz,  $\text{CDCl}_3$ )  $\delta$  176.2, 164.5, 162.8, 145.3, 139.7, 138.5, 133.7 (q,  $J_{\text{C-F}} = 32.5$  Hz), 129.0, 127.9, 125.8 (d,  $J_{\text{C-F}} = 3.6$  Hz), 124.6, 123.7 (d,  $J_{\text{C-F}} = 271.2$  Hz), 120.9, 109.5, 47.6, 22.4, 20.0; IR (KBr)  $\nu$  3228, 3112, 2923, 2857, 1808, 1685, 1619, 1581, 1546, 1446, 1419, 1326, 1295, 1272, 1160, 1110, 1064, 1006, 975, 921, 894, 856  $\text{cm}^{-1}$ ; HRMS (quadrupole, EI) calcd for  $\text{C}_{20}\text{H}_{15}\text{F}_3\text{N}_2\text{O}_3$   $[\text{M}]^+$  388.1035, found 388.1032.

**3-Methyl-*N*-(5-methyl-2-(7-oxo-6-oxa-4-azaspiro[2.4]hept-4-en-5-yl)phenyl)benzamide (4e)**

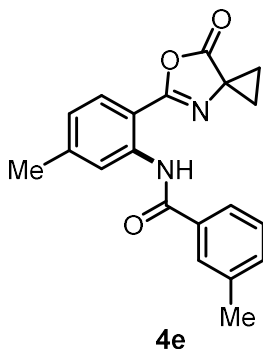

53.5 mg (80%); white solid; mp = 182.7–184.3 °C;  $^1\text{H}$  NMR (400 MHz,  $\text{CDCl}_3$ )  $\delta$  11.89 (s, 1H), 8.83 (s, 1H), 7.79–7.73 (m, 3H), 7.32 (d,  $J = 4.8$  Hz, 2H), 6.99 (d,  $J = 8.0$  Hz, 1H), 2.44 (s, 3H), 2.41 (s, 3H), 1.87 (s, 4H);  $^{13}\text{C}$  NMR (100 MHz,  $\text{CDCl}_3$ )  $\delta$  176.5, 166.0, 162.6, 145.1, 140.2, 138.3, 135.1, 132.7, 128.8, 128.6, 128.0, 124.8, 124.0, 120.7, 109.2, 47.6, 22.3, 21.5, 19.9; IR (KBr)  $\nu$  3100, 2919, 2857, 1808, 1673, 1619, 1577, 1546, 1419, 1326, 1292, 1268, 1083, 1037,

1006, 979, 921, 890, 863  $\text{cm}^{-1}$ ; HRMS (quadrupole, EI) calcd for  $\text{C}_{20}\text{H}_{18}\text{N}_2\text{O}_3$   $[\text{M}]^+$  334.1317, found 334.1318.

**3,4-Dimethoxy-*N*-(5-methyl-2-(7-oxo-6-oxa-4-azaspiro[2.4]hept-4-en-5-yl)phenyl)benzamide (4f)**

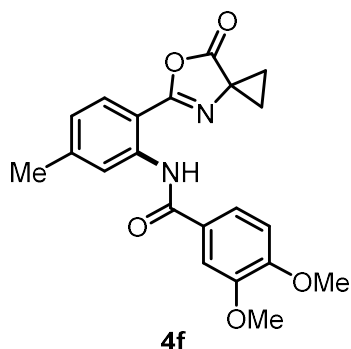

63.2 mg (83%); white solid; mp = 194.4–196.5  $^{\circ}\text{C}$ ;  $^1\text{H}$  NMR (400 MHz,  $\text{CDCl}_3$ )  $\delta$  11.81 (s, 1H), 8.81 (s, 1H), 7.82 (d,  $J$  = 8.0 Hz, 1H), 7.60 (d,  $J$  = 2.0 Hz, 1H), 7.47 (d,  $J$  = 8.4, 2.0 Hz, 1H), 7.00 (d,  $J$  = 7.2 Hz, 1H), 6.87 (d,  $J$  = 8.4 Hz, 1H), 3.96 (s, 6H), 2.46 (s, 3H), 1.90–1.87 (m, 4H);  $^{13}\text{C}$  NMR (100 MHz,  $\text{CDCl}_3$ )  $\delta$  176.5, 165.7, 162.8, 152.4, 149.3, 145.1, 140.3, 128.9, 127.9, 123.9, 120.8, 120.0, 111.6, 110.2, 109.3, 56.3, 56.2, 47.7, 22.4, 19.9; IR (KBr)  $\nu$  3270, 2927, 2846, 1805, 1670, 1619, 1581, 1515, 1446, 1415, 1311, 1265, 1226, 1176, 1087, 1014, 983, 925, 867, 821  $\text{cm}^{-1}$ ; HRMS (quadrupole, EI) calcd for  $\text{C}_{21}\text{H}_{20}\text{N}_2\text{O}_5$   $[\text{M}]^+$  380.1372, found 380.1368.

**2-Fluoro-*N*-(5-methyl-2-(7-oxo-6-oxa-4-azaspiro[2.4]hept-4-en-5-yl)phenyl)benzamide (4g)**

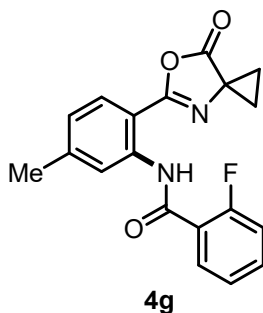

43.2 mg (63%); white solid; mp = 183.2–185.1 °C; <sup>1</sup>H NMR (400 MHz, CDCl<sub>3</sub>) δ 11.92 (s, 1H), 8.80 (s, 1H), 8.02 (td, *J* = 8.0, 2.0 Hz, 1H), 7.80 (d, *J* = 8.0 Hz, 1H), 7.53–7.48 (m, 1H), 7.28 (td, *J* = 8.0, 1.2 Hz, 1H), 7.16–7.11 (m, 1H), 7.04–7.01 (m, 1H), 2.45 (s, 3H), 1.85–1.82 (m, 4H); <sup>13</sup>C NMR (100 MHz, CDCl<sub>3</sub>) δ 177.0, 162.6 (d, *J*<sub>C-F</sub> = 2.2 Hz), 161.5 (d, *J*<sub>C-F</sub> = 52.7 Hz), 158.8, 144.7, 139.6, 133.6 (d, *J*<sub>C-F</sub> = 8.8 Hz), 131.9 (d, *J*<sub>C-F</sub> = 2.3 Hz), 128.8, 124.8 (d, *J*<sub>C-F</sub> = 3.6 Hz), 124.5, 121.8, 116.3 (d, *J*<sub>C-F</sub> = 23.3 Hz), 109.9, 47.8, 22.3, 19.9; IR (KBr) ν 3231, 3081, 1814, 1679, 1649, 1632, 1619, 1582, 1544, 1454, 1415, 1391, 1300, 1267, 1009, 980, 925, 860, 819, 753 cm<sup>-1</sup>; HRMS (quadrupole, EI) calcd for C<sub>19</sub>H<sub>15</sub>FN<sub>2</sub>O<sub>3</sub> [M]<sup>+</sup> 338.1067, found 338.1065.

***N*-(5-Methyl-2-(7-oxo-6-oxa-4-azaspiro[2.4]hept-4-en-5-yl)phenyl)-2-naphthamide (4h)**

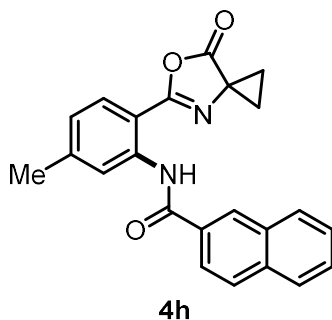

54.1 mg (73%); white solid; mp = 219.6–220.6 °C; <sup>1</sup>H NMR (400 MHz, CDCl<sub>3</sub>) δ 12.13 (s, 1H), 8.90 (s, 1H), 8.46 (s, 1H), 8.03 (dd, *J* = 8.8, 2.0 Hz, 1H), 7.94–7.83 (m, 3H), 7.62–7.56 (m, 2H), 7.03 (d, *J* = 8.0 Hz, 1H), 2.49 (s, 3H), 1.94–1.92 (m, 4H); <sup>13</sup>C NMR (100 MHz, CDCl<sub>3</sub>) δ 176.5, 166.1, 162.8, 145.3, 140.3, 132.8, 132.5, 129.0, 128.6, 128.6, 128.4, 128.2, 128.1, 128.0, 127.1, 124.1, 124.0, 120.8, 109.3, 47.7, 22.4, 20.0; IR (KBr) 3262, 3054, 2923, 2854, 1808, 1739, 1670, 1619, 1581, 1546, 1419, 1299, 1268, 1230, 1203, 1130, 1079, 1006, 979, 925, 863 cm<sup>-1</sup>; HRMS (quadrupole, EI) calcd for C<sub>23</sub>H<sub>18</sub>N<sub>2</sub>O<sub>3</sub> [M]<sup>+</sup> 370.1317, found 370.1314.

***N*-(5-Methyl-2-(7-oxo-6-oxa-4-azaspiro[2.4]hept-4-en-5-yl)phenyl)cinnamamide (4i)**

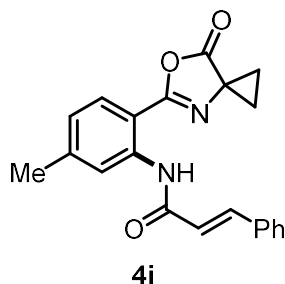

53.4 mg (77%); white solid; mp = 177.3–179.7 °C;  $^1\text{H}$  NMR (400 MHz,  $\text{CDCl}_3$ )  $\delta$  11.33 (s, 1H), 8.74 (s, 1H), 7.78 (d,  $J = 4.8$  Hz, 1H), 7.68 (d,  $J = 8.8$  Hz, 1H), 7.52–7.51 (m, 2H), 7.42–7.38 (m, 3H), 6.98 (d,  $J = 4.8$  Hz, 1H), 6.43 (d,  $J = 8.8$  Hz, 1H), 2.44 (s, 3H), 1.94–1.91 (m, 2H), 1.90–1.87 (m, 2H);  $^{13}\text{C}$  NMR (100 MHz,  $\text{CDCl}_3$ )  $\delta$  176.5, 164.7, 162.5, 145.0, 141.9, 140.1, 134.7, 130.2, 129.0, 128.8, 128.0, 124.0, 122.1, 120.9, 109.0, 47.7, 22.3, 20.1; IR (KBr)  $\nu$  3235, 3104, 2923, 1808, 1677, 1619, 1577, 1542, 1446, 1419, 1326, 1261, 1191, 1145, 1091, 1006, 975, 921, 863  $\text{cm}^{-1}$ ; HRMS (quadrupole, EI) calcd for  $\text{C}_{21}\text{H}_{18}\text{N}_2\text{O}_3$   $[\text{M}]^+$  346.1317, found 346.1316.

***N*-(5-Methyl-2-(7-oxo-6-oxa-4-azaspiro[2.4]hept-4-en-5-yl)phenyl)thiophene-2-carboxamide (4j)**

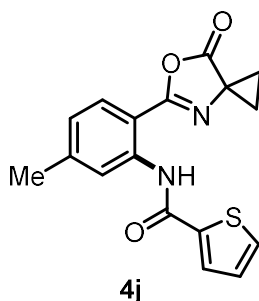

42.5 mg (65%); white solid; mp = 162.5–164.7 °C;  $^1\text{H}$  NMR (400 MHz,  $\text{CDCl}_3$ )  $\delta$  11.88 (s, 1H), 8.72 (s, 1H), 7.79 (d,  $J = 8.0$  Hz, 1H), 7.61–7.54 (m, 2H), 7.11 (dd,  $J = 4.0, 5.2$  Hz, 1H), 6.99 (d,  $J = 8.0$  Hz, 1H), 2.43 (s, 3H), 1.95–1.86 (m, 4H);  $^{13}\text{C}$  NMR (175 MHz,  $\text{CDCl}_3$ )  $\delta$  176.5, 162.6, 160.5, 145.1, 140.4, 139.9, 131.2, 128.9, 128.8, 127.8, 124.1, 120.8, 109.1, 47.7, 22.3, 20.0; IR (KBr)  $\nu$  3089, 2923, 1812, 1716, 1662, 1619, 1577, 1546, 1415, 1353, 1292, 1276, 1168, 1099, 1037, 1010, 979, 925, 875, 836  $\text{cm}^{-1}$ ; HRMS (quadrupole, EI) calcd for  $\text{C}_{17}\text{H}_{14}\text{N}_2\text{O}_3\text{S}$   $[\text{M}]^+$  326.0725, found 326.0726.

***N*-(5-Methyl-2-(7-oxo-6-oxa-4-azaspiro[2.4]hept-4-en-5-yl)phenyl)hexanamide (4k)**

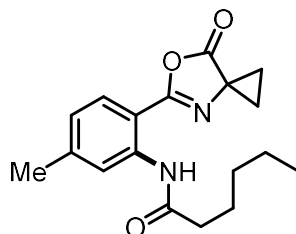

**4k**

15.1 mg (24%); yellow solid; mp = 74.1–76.8 °C; <sup>1</sup>H NMR (400 MHz, CDCl<sub>3</sub>) δ 11.0 (s, 1H), 8.62 (s, 1H), 7.76 (d, *J* = 8.4 Hz, 1H), 6.95 (d, *J* = 8.4 Hz, 1H), 2.41 (s, 3H), 2.36 (t, *J* = 8.0 Hz, 2H) 1.84 (brs, 4H), 1.75–1.67 (m, 2H), 1.38–1.32 (m, 4H), 0.91 (t, *J* = 7.2 Hz, 3H); <sup>13</sup>C NMR (100 MHz, CDCl<sub>3</sub>) δ 176.7, 172.4, 162.4, 144.9, 140.0, 128.7, 123.8, 120.7, 108.8, 47.7, 38.7, 31.4, 25.3, 22.5, 22.3, 20.0, 14.0; IR (KBr) ν 3262, 2954, 2923, 2857, 1816, 1700, 1623, 1581, 1538, 1446, 1419, 1326, 1265, 1187, 1091, 1006, 979, 921, 863, 817 cm<sup>-1</sup>; HRMS (quadrupole, EI) calcd for C<sub>18</sub>H<sub>22</sub>N<sub>2</sub>O<sub>3</sub> [M]<sup>+</sup> 314.1630, found 314.1632.

**3-Benzamido-2-(4-methyl-5-oxo-4,5-dihydrooxazol-2-yl)phenyl acetate (6a)**

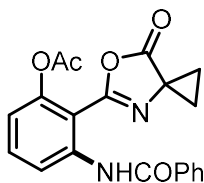

**6a**

60.5 mg (83%); white solid; mp = 180.0–181.1 °C; <sup>1</sup>H NMR (400 MHz, CDCl<sub>3</sub>) δ 11.95 (s, 1H), 8.79 (d, *J* = 8.4 Hz, 1H), 7.82 (d, *J* = 6.8 Hz, 2H), 7.53–7.46 (m, 2H), 7.40 (t, *J* = 8.0 Hz, 2H), 6.82 (d, *J* = 8.0 Hz, 1H), 2.32 (s, 3H), 1.82 (s, 4H); <sup>13</sup>C NMR (100 MHz, CDCl<sub>3</sub>) δ 175.9, 169.9, 165.9, 160.9, 150.0, 141.2, 135.1, 133.9, 132.2, 128.7, 127.4, 118.7, 118.6, 106.8, 46.4, 21.1, 20.3; IR (KBr) ν 3274, 3085, 1927, 1816, 1770, 1685, 1608, 1581, 1542, 1496, 1461, 1369, 1299, 1265, 1195, 1118, 1076, 1010, 979, 921, 871 cm<sup>-1</sup>; HRMS (quadrupole, EI) calcd for C<sub>19</sub>H<sub>16</sub>N<sub>2</sub>O<sub>5</sub> [M]<sup>+</sup> 364.1059, found 352.1058.



***N*-((8*R*,9*S*,13*S*,14*S*)-13-Methyl-17-oxo-3-(7-oxo-6-oxa-4-azaspiro[2.4]hept-4-en-5-yl)-7,8,9,11,12,13,14,15,16,17-decahydro-6*H*-cyclopenta[*a*]phenanthren-2-yl)benzamide (6b)**

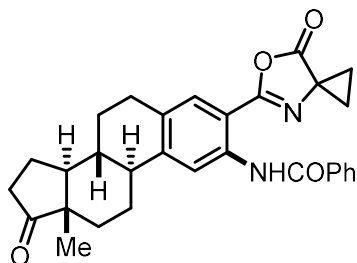

**6b**

50.2 mg (52%); white solid; mp = 258.6–260.1 °C; <sup>1</sup>H NMR (400 MHz, CDCl<sub>3</sub>) δ 11.74 (s, 1H), 8.93 (s, 1H), 7.87 (d, *J* = 7.6 Hz, 2H), 7.56 (s, 1H), 7.50–7.38 (m, 3H), 2.87–2.83 (m, 2H), 2.52–2.43 (m, 2H), 2.31–2.25 (m, 1H), 2.12–1.96 (m, 4H), 1.81 (s, 3H), 1.64–1.55 (m, 3H), 1.50–1.41 (m, 3H), 1.19 (s, 4H); <sup>13</sup>C NMR (100 MHz, CDCl<sub>3</sub>) δ 176.4, 165.8, 162.4, 146.5, 137.9, 135.1, 132.0, 131.5, 128.9, 128.7, 127.4, 119.9, 117.4, 109.6, 50.6, 48.0, 47.6, 45.1, 37.8, 35.9, 31.5, 28.7, 26.3, 25.7, 21.6, 20.0, 13.9; IR (KBr) ν 3278, 3058, 2923, 2854, 1801, 1739, 1677, 1612, 1585, 1527, 1504, 1454, 1407, 1326, 1299, 1272, 1191, 1110, 1076, 1006, 983, 929, 898, 863 cm<sup>-1</sup>; HRMS (quadrupole, EI) calcd for C<sub>30</sub>H<sub>30</sub>N<sub>2</sub>O<sub>4</sub> [M]<sup>+</sup> 482.2206, found 482.2204.

***N*-(2-(7-Oxo-6-oxa-4-azaspiro[2.4]hept-4-en-5-yl)-5-(1-(3,5,5,8,8-pentamethyl-5,6,7,8-tetrahydronaphthalen-2-yl)vinyl)phenyl)benzamide (6c)**

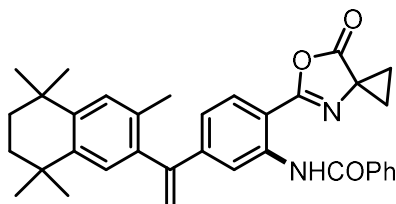

**6c**

86.3 mg (81%); white solid; mp = 195.4–196.7 °C; <sup>1</sup>H NMR (400 MHz, CDCl<sub>3</sub>) δ 11.83 (s, 1H), 9.12 (s, 1H), 7.82 (d, *J* = 7.2 Hz, 2H), 7.65 (d, *J* = 8.4 Hz, 1H), 7.40 (t, *J* = 7.2 Hz, 1H), 7.33 (t, *J* = 7.2 Hz, 2H), 7.03 (s, 1H), 6.96 (s, 1H), 6.69 (d, *J* = 8.0 Hz, 1H), 5.84 (s, 1H), 5.25 (s, 1H), 1.87 (s, 3H), 1.75 (s, 4H), 1.57 (s, 4H), 1.127–1.16 (m, 12H); <sup>13</sup>C NMR (100 MHz, CDCl<sub>3</sub>)

$\delta$  176.3, 166.0, 162.5, 149.0, 146.8, 144.4, 142.4, 140.4, 137.9, 135.2, 132.8, 132.0, 128.8, 128.7, 128.2, 128.1, 127.5, 122.1, 118.2, 117.7, 110.7, 47.7, 35.4, 35.3, 34.1, 34.0, 32.1, 32.0, 20.1, 20.0; IR (KBr)  $\nu$  3270, 2958, 2923, 2861, 1816, 1685, 1616, 1573, 1535, 1419, 1326, 1268, 1191, 1106, 1076, 1006, 979, 917, 856  $\text{cm}^{-1}$ ; HRMS (quadrupole, EI) calcd for  $\text{C}_{35}\text{H}_{36}\text{N}_2\text{O}_3$   $[\text{M}]^+$  532.2726, found 532.2728.

***N*-(4'-((1,7'-Dimethyl-2'-propyl-1*H*,3'*H*-[2,5'-bibenzo[*d*]imidazol]-3'-yl)methyl)-2-(7-oxo-6-oxa-4-azaspiro[2.4]hept-4-en-5-yl)-[1,1'-biphenyl]-3-yl)benzamide (6d)**

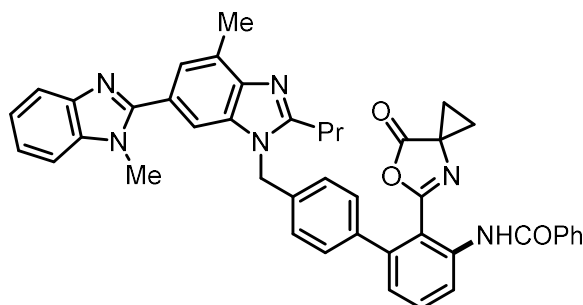

**6d**

100.7 mg (72%); white solid; mp = 133.3–135.9 °C;  $^1\text{H}$  NMR (400 MHz,  $\text{CDCl}_3$ )  $\delta$  8.77 (brs, 1H), 7.79 (d,  $J$  = 7.6 Hz, 1H), 7.70–7.68 (m, 1H), 7.51–7.46 (m, 1H), 7.38 (td,  $J$  = 7.6, 1.6 Hz, 1H), 7.29–7.25 (m, 5H), 7.22–7.16 (m, 4H), 7.07 (t,  $J$  = 7.6 Hz, 2H), 6.98 (d,  $J$  = 8.4 Hz, 2H), 6.90 (t,  $J$  = 7.6 Hz, 1H), 5.35 (s, 2H), 3.55 (s, 3H), 2.87 (t,  $J$  = 8.0 Hz, 2H), 2.80 (s, 3H), 1.84–1.79 (m, 2H), 1.63–1.60 (m, 2H), 1.49–1.46 (m, 2H), 1.00 (t,  $J$  = 7.2 Hz, 3H);  $^{13}\text{C}$  NMR (100 MHz,  $\text{CDCl}_3$ )  $\delta$  178.2, 166.9, 162.8, 158.0, 152.5, 144.2, 141.4, 140.6, 137.8, 134.8, 134.7, 131.8, 131.0, 130.1, 129.4, 129.0, 128.7, 127.9, 127.5, 126.0, 125.6, 124.6, 124.5, 124.3, 124.1, 120.6, 118.0, 110.6, 109.7, 47.9, 47.2, 31.6, 29.9, 21.8, 19.4, 14.3, 14.1; IR (KBr)  $\nu$  3054, 2958, 2927, 2857, 1805, 1735, 1662, 1596, 1531, 1504, 1442, 1396, 1319, 1268, 1091, 1060, 1002, 971, 914, 860  $\text{cm}^{-1}$ ; HRMS (quadrupole, FAB) calcd for  $\text{C}_{44}\text{H}_{38}\text{N}_6\text{O}_3$   $[\text{M}+\text{H}]^+$  699.3078, found 699.3080.

***(S)*-*N*-(3-Ethoxy-5-(2-((3-methyl-1-(2-(piperidin-1-yl)phenyl)butyl)amino)-2-oxoethyl)-2-(7-oxo-6-oxa-4-azaspiro[2.4]hept-4-en-5-yl)phenyl)benzamide (6e)**

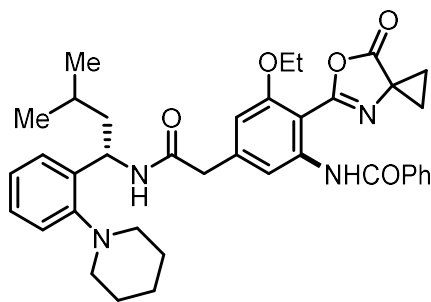

6e

43.4 mg (34%); yellow sticky solid;  $^1\text{H NMR}$  (400 MHz,  $\text{CDCl}_3$ )  $\delta$  11.47 (s, 1H), 8.30 (s, 1H), 7.81 (d,  $J = 7.6$  Hz, 2H), 7.49 (t,  $J = 7.6$  Hz, 1H), 7.41 (t,  $J = 7.6$  Hz, 2H), 7.12 (s, 2H), 7.06 (d,  $J = 7.6$  Hz, 1H), 7.01–6.99 (m, 1H), 6.77 (d,  $J = 8.8$  Hz, 1H), 6.64 (s, 1H), 5.32 (q,  $J = 7.6$  Hz, 1H), 4.02–3.91 (m, 2H), 3.52 (s, 2H), 2.89 (s, 2H), 2.58 (s, 2H), 2.10 (s, 4H), 1.78 (s, 4H), 1.67 (s, 2H), 1.60–1.53 (m, 3H), 1.34 (t,  $J = 6.8$  Hz, 3H), 0.86 (d,  $J = 6.8$  Hz, 6H);  $^{13}\text{C NMR}$  (100 MHz,  $\text{CDCl}_3$ )  $\delta$  177.5, 168.7, 165.6, 162.4, 159.3, 152.6, 142.0, 140.5, 138.9, 135.2, 132.2, 128.7, 127.9, 127.8, 127.3, 125.2, 122.9, 113.9, 108.7, 102.6, 65.2, 50.0, 46.8, 46.7, 44.8, 31.0, 26.8, 25.4, 24.3, 22.9, 22.6, 19.8, 14.7; IR (KBr)  $\nu$  3289, 2931, 2861, 1812, 1677, 1604, 1573, 1538, 1496, 1438, 1388, 1280, 1141, 1106, 1064, 1006, 979, 921, 863  $\text{cm}^{-1}$ ; HRMS (quadrupole, EI) calcd for  $\text{C}_{38}\text{H}_{44}\text{N}_4\text{O}_5$   $[\text{M}]^+$  636.3312, found 636.3311.

## General procedure and characterization data for the transformation into chiral amino acids (**9a** and **9b**) and racemic amino acid (**9c**)

To an oven-dried sealed tube charged with 2-amidobenzoyl azlactone **3s** (0.2 mmol, 100 mol %), urea catalyst **7** (0.01 mmol, 5 mol %) was added DCE (1 mL) followed by allyl alcohol (**8**) (0.3 mmol, 150 mol %) under air at room temperature. The reaction mixture was allowed to stir at room temperature for 48 h. The reaction mixture was diluted with EtOAc (3 mL) and concentrated in vacuo. The residue was purified by flash column chromatography (*n*-hexane:EtOAc) to afford the corresponding compound **9a**. Enantiomeric excess (ee %) of **9a** was determined by analytical liquid chromatography (HPLC) with DAICEL CHIRALPAK® AD-H (4.6 × 250 mm) in comparison with racemic samples.

### Allyl (2-benzamido-4-methylbenzoyl)-*L*-valinate (**9a**)

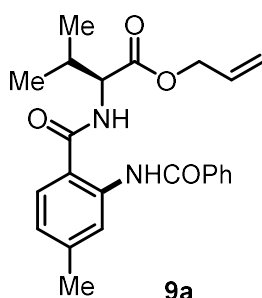

51.3 mg (65%); white solid; mp = 105.0–107.7 °C; <sup>1</sup>H NMR (400 MHz, CDCl<sub>3</sub>) δ 12.05 (s, 1H), 8.69 (s, 1H), 8.01 (d, *J* = 6.8, 1.6 Hz, 1H), 7.53–7.48 (m, 4H), 6.93 (d, *J* = 8.4 Hz, 1H), 6.76 (d, *J* = 8.4 Hz, 1H), 5.96–5.87 (m, 1H), 5.35 (d, *J* = 17.2 Hz, 1H), 5.26 (d, *J* = 10.4 Hz, 1H), 4.79 (dd, *J* = 4.8, 8.4 Hz, 1H), 4.72–4.62 (m, 2H), 2.42 (s, 3H), 2.35–2.27 (m, 1H), 1.01 (d, *J* = 8.0 Hz, 6H); <sup>13</sup>C NMR (100 MHz, CDCl<sub>3</sub>) δ 171.1, 169.1, 165.6, 144.1, 140.2, 135.0, 131.8, 131.5, 128.8, 127.4, 126.7, 123.8, 122.0, 119.3, 117.3, 66.1, 57.4, 31.7, 22.0, 19.1, 18.0; IR (KBr) ν 3313, 3066, 2965, 2931, 1739, 1673, 1643, 1604, 1581, 1523, 1446, 1376, 1288, 1187, 1149, 991, 929 cm<sup>-1</sup>; HRMS (quadrupole, EI) calcd for C<sub>23</sub>H<sub>26</sub>N<sub>2</sub>O<sub>4</sub> [M]<sup>+</sup> 394.1893, found 394.1893; HPLC (Chiralcel AD-H column, *n*-hexanes:*i*-PrOH = 90:10, 1.0 mL/min, 254 nm), *t*<sub>major</sub> = 8.8 min, *t*<sub>minor</sub> = 29.7 min; ee = 89%.

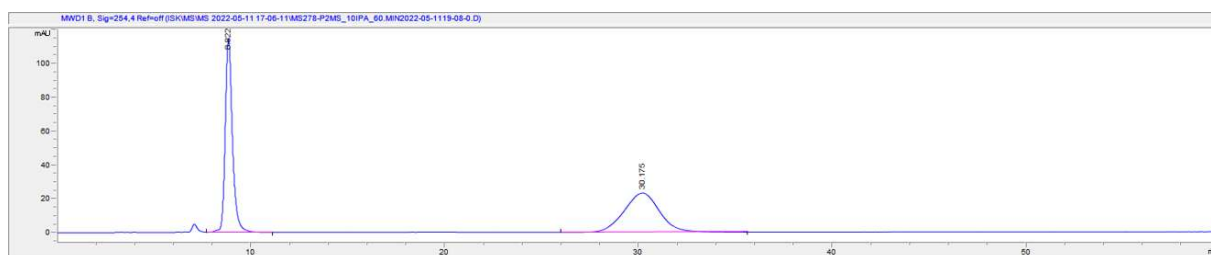

| # | Time   | Type | Area   | Height | Width  | Area%  | Symmetry |
|---|--------|------|--------|--------|--------|--------|----------|
| 1 | 8.822  | VB   | 2980.4 | 114.4  | 0.392  | 50.240 | 0.764    |
| 2 | 30.175 | BB   | 2951.9 | 23.1   | 1.9683 | 49.760 | 1.02     |

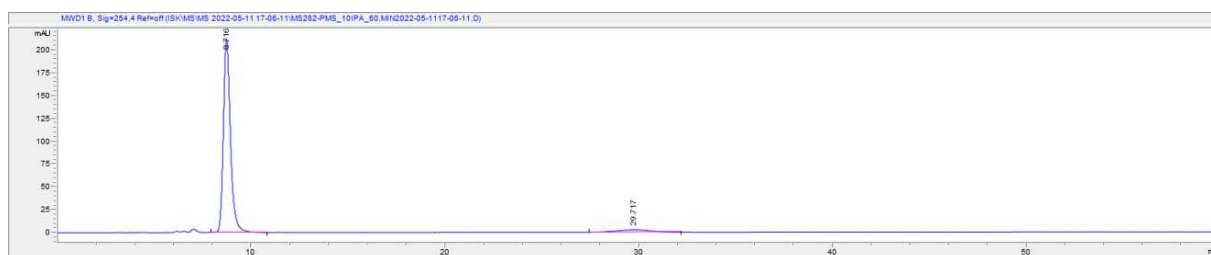

| # | Time   | Type | Area | Height | Width  | Area%  | Symmetry |
|---|--------|------|------|--------|--------|--------|----------|
| 1 | 8.716  | BB   | 5362 | 211.7  | 0.3815 | 94.302 | 0.73     |
| 2 | 29.717 | BB   | 324  | 2.7    | 1.424  | 5.698  | 1.002    |

### Allyl (2-benzamido-4-methylbenzoyl)-L-alaninate (**9b**)

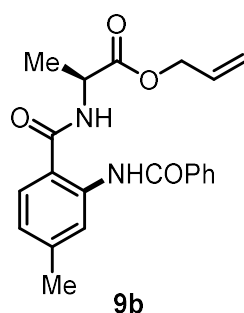

70 mg (96%); white solid; mp = 108.9–111.1 °C; <sup>1</sup>H NMR (400 MHz, CDCl<sub>3</sub>) δ 12.13 (s, 1H), 8.70 (s, 1H), 8.02 (d, *J* = 6.4 Hz, 2H), 7.54–7.47 (m, 4H), 6.94–6.84 (m, 2H), 5.96–5.87 (m, 1H), 5.37–5.24 (m, 2H), 4.84–4.67 (m, 3H), 2.42 (s, 3H), 1.55 (d, *J* = 7.2 Hz, 3H); <sup>13</sup>C NMR (100 MHz, CDCl<sub>3</sub>) δ 172.7, 168.8, 165.6, 144.2, 140.4, 135.0, 131.9, 131.4, 128.8, 127.5, 126.8, 123.8,

122.0, 119.1, 116.9, 66.3, 48.6, 22.0, 18.7; IR (KBr)  $\nu$  3324, 3066, 2927, 1743, 1670, 1643, 1604, 1581, 1527, 1446, 1380, 1295, 1203, 1172, 1118, 1033, 979, 929, 902  $\text{cm}^{-1}$ ; HRMS (quadrupole, EI) calcd for  $\text{C}_{21}\text{H}_{22}\text{N}_2\text{O}_4$   $[\text{M}]^+$  366.1580, found 366.1577; HPLC (Chiralcel AD-H column, *n*-hexanes:*i*-PrOH = 90:10, 1 mL/min, 254 nm),  $t_{\text{major}} = 12.4$  min,  $t_{\text{minor}} = 35.9$  min; ee = 83%.

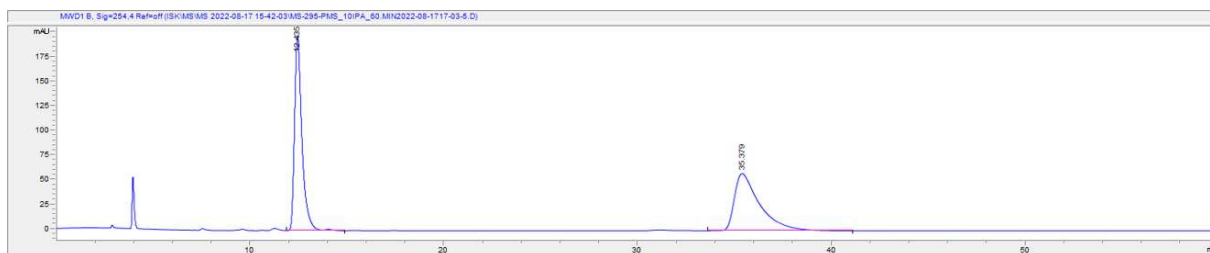

| # | Time   | Type | Area   | Height | Width  | Area%  | Symmetry |
|---|--------|------|--------|--------|--------|--------|----------|
| 1 | 12.435 | BV R | 5240   | 196.8  | 0.3966 | 50.198 | 0.602    |
| 2 | 35.379 | BB   | 5198.7 | 57.9   | 1.2789 | 49.802 | 0.41     |

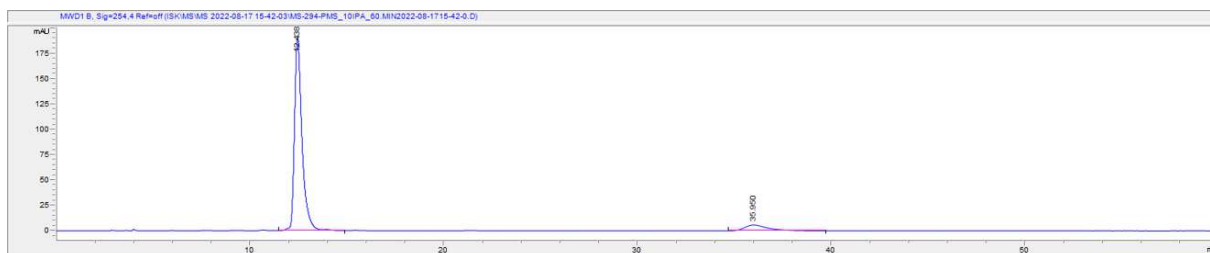

| # | Time   | Type | Area   | Height | Width  | Area%  | Symmetry |
|---|--------|------|--------|--------|--------|--------|----------|
| 1 | 12.438 | BV R | 5175.7 | 191.1  | 0.4019 | 91.648 | 0.618    |
| 2 | 35.95  | BB   | 471.7  | 5.7    | 1.0085 | 8.352  | 0.555    |

### Allyl 1-(2-benzamido-4-methylbenzamido)cyclopropane-1-carboxylate (**9c**)

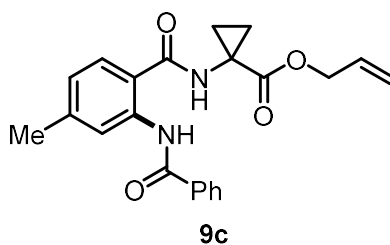

23.3 mg (31%); white solid; mp = 162.2–163.4 °C; <sup>1</sup>H NMR (400 MHz, CDCl<sub>3</sub>) δ 11.95 (s, 1H), 8.67 (s, 1H), 8.02 (dd, *J* = 8.4, 1.6Hz, 2H), 7.56–7.47 (m, 3H), 7.41 (d, *J* = 8.0Hz, 1H), 6.91 (d, *J* = 8.0Hz, 1H), 6.78 (s, 1H), 5.83–5.73 (m, 1H) 5.21 (dd, *J* = 17.2, 2.4Hz, 1H), 5.07 (dd, *J* = 10.4, 1.6Hz, 1H), 4.57 (dt, *J* = 5.6, 1.6Hz, 2H), 2.42 (s, 3H), 1.74–1.70 (m, 2H), 1.31–1.28 (m, 2H); <sup>13</sup>C NMR (100 MHz, CDCl<sub>3</sub>) δ 171.8, 170.8, 165.7, 144.3, 140.2, 134.9, 131.9, 131.7, 128.8, 127.5, 126.7, 123.8, 122.2, 118.4, 117.4, 66.1, 34.2, 22.1, 17.9; IR (KBr) ν 3324, 2923, 2854, 1727, 1650, 1608, 1581, 1527, 1442, 1322, 1284, 1168, 1033, 979, 933 cm<sup>-1</sup>; HRMS (quadrupole, EI) calcd for C<sub>22</sub>H<sub>22</sub>N<sub>2</sub>O<sub>4</sub> [M]<sup>+</sup> 378.1580, found 378.1581.

## Experimental procedure of gram-scale reaction of **1a**

To an oven-dried sealed tube charged with 2-aryl azlactone **1a** (1 g, 5.0 mmol, 100 mol %), [IrCp\*Cl<sub>2</sub>]<sub>2</sub> (99.6 mg, 0.125 mmol, 2.5 mol %), AgNTf<sub>2</sub> (194.0 mg, 0.5 mmol, 10 mol %), LiOAc (99.0 mg, 1.5 mmol, 30 mol %), and acyl azide **2a** (1.1 g, 7.5 mmol, 150 mol %) was added DCE (25 mL) under air at room temperature. The reaction mixture was allowed to stir at 50 °C for 24 h. The reaction mixture was cooled to room temperature, diluted with EtOAc (45 mL) and concentrated in vacuo. The residue was purified by flash column chromatography (*n*-hexane:EtOAc = 10:1 to 8:1) to afford 1.15 g of **3a** in 72% yield.



## General procedure and characterization data for the formation of iridacycle-1a (CCDC 2162876)

To an oven-dried sealed tube charged with 2-phenyl azlactone (**1a**) (0.4 mmol, 100 mol %), [IrCp\*Cl<sub>2</sub>]<sub>2</sub> (159.4 mg, 0.2 mmol, 50 mol %), Li<sub>2</sub>CO<sub>3</sub> (14.8 mg, 0.2 mmol, 50 mol %) and AgTFA (44.2 mg, 0.2 mmol, 50 mol %) was added DCE (10 mL) under Ar at room temperature. The reaction mixture was allowed to stir at 40 °C for 24 h. The reaction mixture was cooled to room temperature, diluted with EtOAc (3 mL) and concentrated in vacuo. The resulting powder was crystallized with (*n*-hexanes/EtOAc) at room temperature to afford **iridacycle-1a** (82.1 mg) in 32% yield.

### (5-Methyl-2-(7-oxo-6-oxa-4-azaspiro[2.4]hept-4-en-5-yl)phenyl)(1,2,3,4,5-pentamethylcyclopenta-2,4-dien-1-yl)((trifluoromethoxy)carbonyl)iridium (iridacycle-1a)

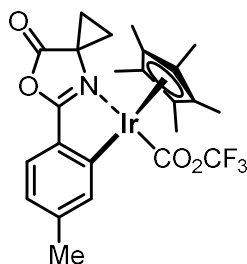

**iridacycle-1a**

82.1 mg (32%); yellow solid; mp = 203.2–205.0 °C; <sup>1</sup>H NMR (700 MHz, CDCl<sub>3</sub>) δ 7.93 (s, 1H), 7.43 (d, *J* = 7.7 Hz, 1H), 6.93 (d, *J* = 7.7 Hz, 1H), 2.46 (s, 3H), 2.21–2.18 (m, 1H), 1.99–1.95 (m, 1H), 1.89–1.85 (m, 1H), 1.77–1.75 (m, 1H), 1.72 (s, 15H); <sup>13</sup>C NMR (175 MHz, CDCl<sub>3</sub>) δ 178.1, 174.7, 164.1, 162.8 (d, *J*<sub>C-F</sub> = 35.8 Hz), 143.8, 136.8, 129.4, 126.3, 124.4, 114.4 (d, *J*<sub>C-F</sub> = 289.2 Hz), 87.3, 48.5, 22.4, 18.0, 17.8, 9.9; IR (KBr) ν 2989, 2919, 1847, 1824, 1704, 1612, 1581, 1538, 1461, 1376, 1326, 1276, 1187, 1137, 1033, 1010, 921, 879, 836 cm<sup>-1</sup>; HRMS (quadrupole, EI) calcd for C<sub>24</sub>H<sub>25</sub>F<sub>3</sub>IrNO<sub>4</sub> [M]<sup>+</sup> 641.1365, found 641.1362.

## **X-ray crystallographic data of compound 3a (CCDC 2154665)**

### **Detailed experimental description for the crystal measurement of compound 3a**

Crystals grew as colorless blocks in dichloromethane by slow evaporation from pentane. The crystal structures of compound **3a** were determined by standard crystallographic methods. A colorless plate-like-shaped crystal (0.020 x 0.100 x 0.160 mm<sup>3</sup>) was used for single-crystal X-ray diffraction. The data were collected at 296 (2) K using a Bruker D8 Venture equipped with I $\mu$ S micro-focus sealed tube Mo K $\alpha$  ( $\lambda$ = 0.71073 Å) and a PHOTON III M14 detector in Western Seoul Center of Korea Basic Science Institute. Data collection and integration were performed with SMART APEX3 software package (SAINT). Absorption correction was performed by multi-scan method implemented in SADABS. The structure was solved by direct methods and refined by full-matrix least-squares on  $F^2$  using SHELXTL program package (version 6.14). All the non-hydrogen atoms were refined anisotropically, and hydrogen atoms were added to their geometrically ideal positions.

Details of crystal data, data collection and structure refinement are listed in Table S1. Further details of the individual structures can be obtained from the Cambridge Crystallographic Data Centre by quoting **CCDC 2154665**.

### Sample preparation (vapor diffusion)

Compound **3a** (3.8 mg) was dissolved with 1 mL of CH<sub>2</sub>Cl<sub>2</sub> in opened inner vessel, and pentane (5 mL) as an anti-solvent has been employed in closed outer vessel. After vapor diffusion for 9 days, the single crystals of compound **3a** were obtained.

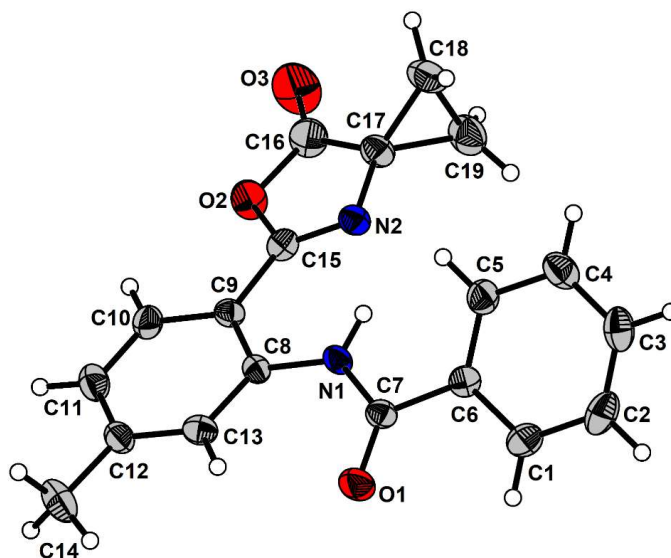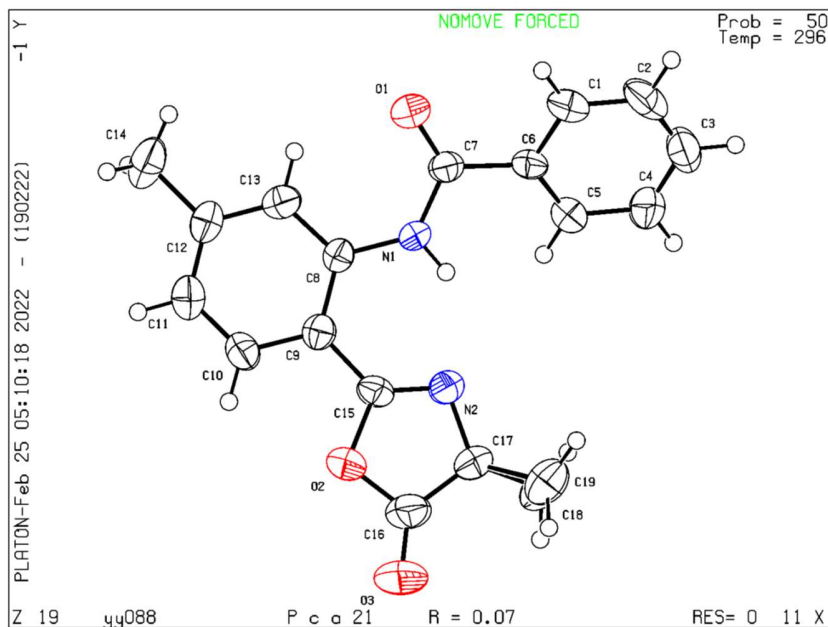

**Table S1: Data collection details for 3a.**

| Axis  | dx/mm  | 2 $\theta$ / $^{\circ}$ | $\omega$ / $^{\circ}$ | $\varphi$ / $^{\circ}$ | $\chi$ / $^{\circ}$ | Width/ $^{\circ}$ | Frames | Time/s | Wavelength/ $\text{\AA}$ | Voltage/kV | Current/mA | Temperature/K |
|-------|--------|-------------------------|-----------------------|------------------------|---------------------|-------------------|--------|--------|--------------------------|------------|------------|---------------|
| Omega | 60.586 | 18.54                   | -174.46               | -156.00                | 54.74               | 1.00              | 206    | 10.00  | 0.71073                  | 50         | 30.0       | n/a           |
| Omega | 60.586 | 27.81                   | -165.19               | 0.00                   | 54.74               | 1.00              | 206    | 10.00  | 0.71073                  | 50         | 30.0       | n/a           |
| Omega | 60.586 | 18.54                   | -174.46               | 102.00                 | 54.74               | 1.00              | 206    | 10.00  | 0.71073                  | 50         | 30.0       | n/a           |
| Omega | 60.586 | 18.54                   | -174.46               | -54.00                 | 54.74               | 1.00              | 206    | 10.00  | 0.71073                  | 50         | 30.0       | n/a           |
| Omega | 60.586 | 18.54                   | -174.46               | 153.00                 | 54.74               | 1.00              | 206    | 10.00  | 0.71073                  | 50         | 30.0       | n/a           |
| Phi   | 60.586 | 18.54                   | 31.54                 | 0.00                   | 54.74               | 1.00              | 360    | 10.00  | 0.71073                  | 50         | 30.0       | n/a           |
| Phi   | 60.586 | 0.00                    | 0.00                  | 0.00                   | 54.74               | 360.00            | 1      | 108.00 | 0.71073                  | 50         | 30.0       | n/a           |

A total of 1391 frames were collected. The total exposure time was 3.89 hours. The frames were integrated with the Bruker SAINT software package using a narrow-frame algorithm. The integration of the data using an orthorhombic unit cell yielded a total of 56517 reflections to a maximum  $\theta$  angle of 28.29 $^{\circ}$  (0.75  $\text{\AA}$  resolution), of which 4026 were independent (average redundancy 14.038, completeness = 99.9%,  $R_{\text{int}} = 12.73\%$ ,  $R_{\text{sig}} = 6.37\%$ ) and 2506 (62.25%) were greater than  $2\sigma(F^2)$ . The final cell constants of  $a = 11.6867(10)$   $\text{\AA}$ ,  $b = 19.3211(17)$   $\text{\AA}$ ,  $c = 7.1481(6)$   $\text{\AA}$ , volume = 1614.0(2)  $\text{\AA}^3$ , are based upon the refinement of the XYZ-centroids of 5067 reflections above  $20\sigma(I)$  with  $5.471^{\circ} < 2\theta < 43.62^{\circ}$ . Data were corrected for absorption effects using the Multi-Scan method (SADABS). The ratio of minimum to maximum apparent transmission was 0.910. The calculated minimum and maximum transmission coefficients (based on crystal size) are 0.9860 and 0.9980.

The structure was solved and refined using the Bruker SHELXTL Software Package, using the space group  $Pc a 2_1$ , with  $Z = 4$  for the formula unit,  $C_{19}H_{16}N_2O_3$ . The final anisotropic full-matrix least-squares refinement on  $F^2$  with 218 variables converged at  $R1 = 6.90\%$ , for the observed data and  $wR2 = 13.72\%$  for all data. The goodness-of-fit was 1.029. The largest peak in the final difference electron density synthesis was 0.146  $e^{-}/\text{\AA}^3$  and the largest hole was -0.182  $e^{-}/\text{\AA}^3$  with an RMS deviation of 0.036  $e^{-}/\text{\AA}^3$ . On the basis of the final model, the calculated density was 1.318  $\text{g}/\text{cm}^3$  and  $F(000)$ , 672  $e^{-}$ .

**Table S2. Sample and crystal data for 3a.**

|                             |                                |                       |
|-----------------------------|--------------------------------|-----------------------|
| <b>Chemical formula</b>     | $C_{19}H_{16}N_2O_3$           |                       |
| <b>Formula weight</b>       | 320.34 g/mol                   |                       |
| <b>Temperature</b>          | 296(2) K                       |                       |
| <b>Wavelength</b>           | 0.71073 $\text{\AA}$           |                       |
| <b>Crystal size</b>         | 0.020 x 0.100 x 0.160 mm       |                       |
| <b>Crystal habit</b>        | colorless plate                |                       |
| <b>Crystal system</b>       | orthorhombic                   |                       |
| <b>Space group</b>          | $Pc a 2_1$                     |                       |
| <b>Unit cell dimensions</b> | $a = 11.6867(10)$ $\text{\AA}$ | $\alpha = 90^{\circ}$ |
|                             | $b = 19.3211(17)$ $\text{\AA}$ | $\beta = 90^{\circ}$  |
|                             | $c = 7.1481(6)$ $\text{\AA}$   | $\gamma = 90^{\circ}$ |
| <b>Volume</b>               | 1614.0(2) $\text{\AA}^3$       |                       |
| <b>Z</b>                    | 4                              |                       |
| <b>Density (calculated)</b> | 1.318 $\text{g}/\text{cm}^3$   |                       |

|                               |                        |
|-------------------------------|------------------------|
| <b>Absorption coefficient</b> | 0.091 mm <sup>-1</sup> |
| <b>F(000)</b>                 | 672                    |

**Table S3. Data collection and structure refinement for 3a.**

|                                            |                                                                                                                                                                       |                                                      |
|--------------------------------------------|-----------------------------------------------------------------------------------------------------------------------------------------------------------------------|------------------------------------------------------|
| <b>Theta range for data collection</b>     | 2.04 to 28.29°                                                                                                                                                        |                                                      |
| <b>Index ranges</b>                        | -15 ≤ h ≤ 15, -25 ≤ k ≤ 25, -9 ≤ l ≤ 9                                                                                                                                |                                                      |
| <b>Reflections collected</b>               | 56517                                                                                                                                                                 |                                                      |
| <b>Independent reflections</b>             | 4026 [R(int) = 0.1273]                                                                                                                                                |                                                      |
| <b>Coverage of independent reflections</b> | 99.9%                                                                                                                                                                 |                                                      |
| <b>Absorption correction</b>               | Multi-Scan                                                                                                                                                            |                                                      |
| <b>Max. and min. transmission</b>          | 0.9980 and 0.9860                                                                                                                                                     |                                                      |
| <b>Structure solution technique</b>        | direct methods                                                                                                                                                        |                                                      |
| <b>Structure solution program</b>          | SHELXT 2018/2 (Sheldrick, 2018)                                                                                                                                       |                                                      |
| <b>Refinement method</b>                   | Full-matrix least-squares on F <sup>2</sup>                                                                                                                           |                                                      |
| <b>Refinement program</b>                  | SHELXL-2018/3 (Sheldrick, 2018)                                                                                                                                       |                                                      |
| <b>Function minimized</b>                  | Σ w(F <sub>o</sub> <sup>2</sup> - F <sub>c</sub> <sup>2</sup> ) <sup>2</sup>                                                                                          |                                                      |
| <b>Data / restraints / parameters</b>      | 4026 / 1 / 218                                                                                                                                                        |                                                      |
| <b>Goodness-of-fit on F<sup>2</sup></b>    | 1.029                                                                                                                                                                 |                                                      |
| <b>Final R indices</b>                     | 2506 data;<br>I > 2σ(I)                                                                                                                                               | R <sub>1</sub> = 0.0690, wR <sub>2</sub> =<br>0.1191 |
|                                            | all data                                                                                                                                                              | R <sub>1</sub> = 0.1231, wR <sub>2</sub> =<br>0.1372 |
| <b>Weighting scheme</b>                    | w = 1/[σ <sup>2</sup> (F <sub>o</sub> <sup>2</sup> ) + (0.0432P) <sup>2</sup> + 0.6033P]<br>where P = (F <sub>o</sub> <sup>2</sup> + 2F <sub>c</sub> <sup>2</sup> )/3 |                                                      |
| <b>Absolute structure parameter</b>        | -0.7(10)                                                                                                                                                              |                                                      |
| <b>Largest diff. peak and hole</b>         | 0.146 and -0.182 eÅ <sup>-3</sup>                                                                                                                                     |                                                      |
| <b>R.M.S. deviation from mean</b>          | 0.036 eÅ <sup>-3</sup>                                                                                                                                                |                                                      |

**Table S4. Atomic coordinates and equivalent isotropic atomic displacement parameters (Å<sup>2</sup>) for 3a.**

U(eq) is defined as one third of the trace of the orthogonalized U<sub>ij</sub> tensor.

|    | <b>x/a</b> | <b>y/b</b> | <b>z/c</b> | <b>U(eq)</b> |
|----|------------|------------|------------|--------------|
| C1 | 0.4714(4)  | 0.9408(2)  | 0.6842(7)  | 0.0548(12)   |
| C2 | 0.5797(5)  | 0.9703(2)  | 0.6785(8)  | 0.0653(15)   |

|     |           |             |           |            |
|-----|-----------|-------------|-----------|------------|
| C3  | 0.6602(4) | 0.9456(2)   | 0.5581(8) | 0.0612(14) |
| C4  | 0.6360(4) | 0.8914(2)   | 0.4430(9) | 0.0591(12) |
| C5  | 0.5272(3) | 0.8613(2)   | 0.4475(8) | 0.0504(11) |
| C6  | 0.4452(3) | 0.88554(19) | 0.5682(6) | 0.0389(9)  |
| C7  | 0.3258(3) | 0.8577(2)   | 0.5745(6) | 0.0388(9)  |
| C8  | 0.2141(3) | 0.75301(19) | 0.4885(5) | 0.0336(9)  |
| C9  | 0.2233(3) | 0.68135(19) | 0.4564(6) | 0.0384(9)  |
| C10 | 0.1227(3) | 0.6430(2)   | 0.4321(7) | 0.0456(10) |
| C11 | 0.0180(3) | 0.6743(2)   | 0.4337(7) | 0.0512(11) |
| C12 | 0.0077(3) | 0.7449(2)   | 0.4622(6) | 0.0452(10) |
| C13 | 0.1060(3) | 0.7833(2)   | 0.4894(6) | 0.0445(10) |
| C14 | 0.8935(3) | 0.7803(3)   | 0.4534(9) | 0.0708(14) |
| C15 | 0.3334(3) | 0.64644(18) | 0.4434(6) | 0.0391(9)  |
| C16 | 0.4394(4) | 0.5515(2)   | 0.4153(9) | 0.0636(13) |
| C17 | 0.5096(3) | 0.6134(2)   | 0.4288(7) | 0.0477(10) |
| C18 | 0.6211(4) | 0.6186(3)   | 0.3209(7) | 0.0650(15) |
| C19 | 0.6239(5) | 0.6114(3)   | 0.5258(7) | 0.0669(15) |
| N1  | 0.3144(3) | 0.79171(16) | 0.5121(5) | 0.0383(8)  |
| N2  | 0.4338(3) | 0.67144(15) | 0.4436(5) | 0.0418(8)  |
| O1  | 0.2469(3) | 0.89217(14) | 0.6347(5) | 0.0599(9)  |
| O2  | 0.3269(2) | 0.57426(13) | 0.4279(6) | 0.0601(9)  |
| O3  | 0.4609(3) | 0.49159(16) | 0.3988(9) | 0.1021(15) |

**Table S5. Bond lengths (Å) for 3a.**

|         |          |         |          |
|---------|----------|---------|----------|
| C1-C6   | 1.387(6) | C1-C2   | 1.389(6) |
| C1-H1   | 0.93     | C2-C3   | 1.361(7) |
| C2-H2   | 0.93     | C3-C4   | 1.362(7) |
| C3-H3   | 0.93     | C4-C5   | 1.399(5) |
| C4-H4   | 0.93     | C5-C6   | 1.372(6) |
| C5-H5   | 0.93     | C6-C7   | 1.496(5) |
| C7-O1   | 1.216(5) | C7-N1   | 1.358(5) |
| C8-C13  | 1.393(5) | C8-N1   | 1.400(5) |
| C8-C9   | 1.408(5) | C9-C10  | 1.401(5) |
| C9-C15  | 1.456(5) | C10-C11 | 1.365(5) |
| C10-H10 | 0.93     | C11-C12 | 1.385(6) |
| C11-H11 | 0.93     | C12-C13 | 1.380(6) |
| C12-C14 | 1.501(6) | C13-H13 | 0.93     |

|          |          |          |          |
|----------|----------|----------|----------|
| C14-H14A | 0.96     | C14-H14B | 0.96     |
| C14-H14C | 0.96     | C15-N2   | 1.268(4) |
| C15-O2   | 1.401(4) | C16-O3   | 1.191(5) |
| C16-O2   | 1.389(5) | C16-C17  | 1.454(6) |
| C17-N2   | 1.433(4) | C17-C19  | 1.505(7) |
| C17-C18  | 1.518(7) | C18-C19  | 1.472(6) |
| C18-H18A | 0.97     | C18-H18B | 0.97     |
| C19-H19A | 0.97     | C19-H19B | 0.97     |
| N1-H1A   | 0.86     |          |          |

**Table S6. Bond angles (°) for 3a.**

|               |          |               |          |
|---------------|----------|---------------|----------|
| C6-C1-C2      | 120.0(4) | C6-C1-H1      | 120.0    |
| C2-C1-H1      | 120.0    | C3-C2-C1      | 120.3(4) |
| C3-C2-H2      | 119.9    | C1-C2-H2      | 119.9    |
| C2-C3-C4      | 120.6(4) | C2-C3-H3      | 119.7    |
| C4-C3-H3      | 119.7    | C3-C4-C5      | 119.6(5) |
| C3-C4-H4      | 120.2    | C5-C4-H4      | 120.2    |
| C6-C5-C4      | 120.5(4) | C6-C5-H5      | 119.8    |
| C4-C5-H5      | 119.8    | C5-C6-C1      | 119.0(4) |
| C5-C6-C7      | 123.2(4) | C1-C6-C7      | 117.7(4) |
| O1-C7-N1      | 123.8(4) | O1-C7-C6      | 121.4(4) |
| N1-C7-C6      | 114.8(3) | C13-C8-N1     | 122.3(3) |
| C13-C8-C9     | 118.9(3) | N1-C8-C9      | 118.8(3) |
| C10-C9-C8     | 118.5(3) | C10-C9-C15    | 119.3(3) |
| C8-C9-C15     | 122.2(3) | C11-C10-C9    | 121.1(4) |
| C11-C10-H10   | 119.5    | C9-C10-H10    | 119.5    |
| C10-C11-C12   | 121.1(4) | C10-C11-H11   | 119.5    |
| C12-C11-H11   | 119.5    | C13-C12-C11   | 118.5(4) |
| C13-C12-C14   | 120.1(4) | C11-C12-C14   | 121.3(4) |
| C12-C13-C8    | 121.9(4) | C12-C13-H13   | 119.0    |
| C8-C13-H13    | 119.0    | C12-C14-H14A  | 109.5    |
| C12-C14-H14B  | 109.5    | H14A-C14-H14B | 109.5    |
| C12-C14-H14C  | 109.5    | H14A-C14-H14C | 109.5    |
| H14B-C14-H14C | 109.5    | N2-C15-O2     | 115.5(3) |
| N2-C15-C9     | 129.9(3) | O2-C15-C9     | 114.7(3) |
| O3-C16-O2     | 120.9(4) | O3-C16-C17    | 133.4(5) |
| O2-C16-C17    | 105.7(3) | N2-C17-C16    | 107.4(3) |

|               |          |              |          |
|---------------|----------|--------------|----------|
| N2-C17-C19    | 122.4(4) | C16-C17-C19  | 120.7(4) |
| N2-C17-C18    | 121.1(4) | C16-C17-C18  | 120.3(4) |
| C19-C17-C18   | 58.3(3)  | C19-C18-C17  | 60.4(4)  |
| C19-C18-H18A  | 117.7    | C17-C18-H18A | 117.7    |
| C19-C18-H18B  | 117.7    | C17-C18-H18B | 117.7    |
| H18A-C18-H18B | 114.8    | C18-C19-C17  | 61.3(4)  |
| C18-C19-H19A  | 117.6    | C17-C19-H19A | 117.6    |
| C18-C19-H19B  | 117.6    | C17-C19-H19B | 117.6    |
| H19A-C19-H19B | 114.7    | C7-N1-C8     | 128.6(3) |
| C7-N1-H1A     | 115.7    | C8-N1-H1A    | 115.7    |
| C15-N2-C17    | 105.9(3) | C16-O2-C15   | 105.5(3) |

**Table S7. Anisotropic atomic displacement parameters ( $\text{\AA}^2$ ) for 3a.**

The anisotropic atomic displacement factor exponent takes the form: -  
 $2\pi^2 [ h^2 a^{*2} U_{11} + \dots + 2 h k a^* b^* U_{12} ]$

|     | $U_{11}$ | $U_{22}$   | $U_{33}$ | $U_{23}$    | $U_{13}$   | $U_{12}$    |
|-----|----------|------------|----------|-------------|------------|-------------|
| C1  | 0.062(3) | 0.037(2)   | 0.065(3) | -0.013(2)   | 0.001(2)   | 0.000(2)    |
| C2  | 0.081(4) | 0.043(3)   | 0.072(4) | -0.011(3)   | -0.017(3)  | -0.017(3)   |
| C3  | 0.050(3) | 0.054(3)   | 0.080(4) | 0.008(3)    | -0.013(3)  | -0.017(2)   |
| C4  | 0.042(2) | 0.057(3)   | 0.078(3) | 0.002(3)    | 0.011(3)   | -0.004(2)   |
| C5  | 0.047(2) | 0.039(2)   | 0.065(3) | -0.006(2)   | -0.003(3)  | -0.0038(19) |
| C6  | 0.044(2) | 0.0260(19) | 0.046(2) | 0.003(2)    | -0.001(2)  | 0.0019(17)  |
| C7  | 0.039(2) | 0.034(2)   | 0.043(2) | -0.0006(19) | 0.0017(19) | 0.0050(19)  |
| C8  | 0.031(2) | 0.038(2)   | 0.032(2) | 0.0045(17)  | 0.0008(15) | 0.0005(16)  |
| C9  | 0.037(2) | 0.043(2)   | 0.035(2) | 0.001(2)    | 0.0049(19) | -0.0008(17) |
| C10 | 0.045(2) | 0.043(2)   | 0.049(3) | -0.004(2)   | -0.002(2)  | -0.0086(18) |
| C11 | 0.040(2) | 0.061(3)   | 0.053(3) | 0.005(3)    | -0.001(2)  | -0.009(2)   |
| C12 | 0.033(2) | 0.061(3)   | 0.041(2) | 0.002(2)    | 0.0018(19) | 0.0003(19)  |
| C13 | 0.046(2) | 0.041(2)   | 0.046(3) | 0.001(2)    | 0.005(2)   | 0.007(2)    |
| C14 | 0.038(2) | 0.091(4)   | 0.083(4) | 0.014(4)    | -0.002(3)  | 0.005(2)    |
| C15 | 0.048(2) | 0.0288(19) | 0.040(2) | 0.003(2)    | -0.003(2)  | 0.0003(17)  |
| C16 | 0.064(3) | 0.045(3)   | 0.082(4) | -0.004(3)   | -0.011(3)  | 0.015(2)    |
| C17 | 0.043(2) | 0.044(2)   | 0.056(3) | 0.001(2)    | -0.001(2)  | 0.0112(18)  |
| C18 | 0.050(3) | 0.076(4)   | 0.068(4) | -0.003(3)   | 0.010(3)   | 0.017(3)    |
| C19 | 0.054(3) | 0.078(4)   | 0.069(4) | 0.008(3)    | -0.008(3)  | 0.015(3)    |



|    |            |            |          |             |            |            |
|----|------------|------------|----------|-------------|------------|------------|
| N1 | 0.0302(17) | 0.0316(17) | 0.053(2) | -0.0027(16) | 0.0011(15) | 0.0053(14) |
| N2 | 0.0389(18) | 0.0393(17) | 0.047(2) | 0.0000(18)  | 0.0024(18) | 0.0041(15) |
| O1 | 0.0471(17) | 0.0476(16) | 0.085(3) | -0.0167(17) | 0.0066(17) | 0.0067(17) |
| O2 | 0.0548(19) | 0.0325(14) | 0.093(2) | -0.0034(19) | -0.004(2)  | 0.0004(13) |
| O3 | 0.091(3)   | 0.0406(18) | 0.174(4) | -0.004(3)   | -0.011(3)  | 0.0209(18) |

**Table S8. Hydrogen atomic coordinates and isotropic atomic displacement parameters ( $\text{\AA}^2$ ) for 3a.**

|      | x/a     | y/b    | z/c    | U(eq) |
|------|---------|--------|--------|-------|
| H1   | 0.4165  | 0.9581 | 0.7659 | 0.066 |
| H2   | 0.5974  | 1.0071 | 0.7573 | 0.078 |
| H3   | 0.7322  | 0.9660 | 0.5544 | 0.073 |
| H4   | 0.6916  | 0.8744 | 0.3620 | 0.071 |
| H5   | 0.5103  | 0.8246 | 0.3680 | 0.061 |
| H10  | 0.1273  | 0.5954 | 0.4146 | 0.055 |
| H11  | -0.0474 | 0.6478 | 0.4154 | 0.061 |
| H13  | 0.0998  | 0.8307 | 0.5089 | 0.053 |
| H14A | -0.1609 | 0.7549 | 0.5270 | 0.106 |
| H14B | -0.1321 | 0.7821 | 0.3259 | 0.106 |
| H14C | -0.0997 | 0.8265 | 0.5018 | 0.106 |
| H18A | 0.6441  | 0.5790 | 0.2464 | 0.078 |
| H18B | 0.6413  | 0.6632 | 0.2681 | 0.078 |
| H19A | 0.6461  | 0.6516 | 0.5985 | 0.08  |
| H19B | 0.6489  | 0.5674 | 0.5768 | 0.08  |
| H1A  | 0.3770  | 0.7709 | 0.4833 | 0.046 |

## **X-ray crystallographic data of iridacycle-1a (CCDC 2162876)**

### **Detailed experimental description for the crystal measurement of iridacycle-1a**

Crystals grew as light pink rods in dichloromethane by slow evaporation from pentane. The crystal structures of **iridacycle-1a** were determined by standard crystallographic methods. A colorless plate-like-shaped crystal (0.020 x 0.080 x 0.250 mm<sup>3</sup>) was used for single-crystal X-ray diffraction. The data were collected at 296 (2) K using a Bruker D8 Venture equipped with I $\mu$ S micro-focus sealed tube Mo K $\alpha$  ( $\lambda$  = 0.71073 Å) and a PHOTON III M14 detector in Western Seoul Center of Korea Basic Science Institute. Data collection and integration were performed with SMART APEX3 software package (SAINT). Absorption correction was performed by multi-scan method implemented in SADABS. The structure was solved by direct methods and refined by full-matrix least-squares on  $F^2$  using SHELXTL program package (version 6.14). All the non-hydrogen atoms were refined anisotropically, and hydrogen atoms were added to their geometrically ideal positions.

Details of crystal data, data collection and structure refinement are listed in Table S9. Further details of the individual structures can be obtained from the Cambridge Crystallographic Data Centre by quoting **CCDC 2162876**.

## Sample preparation (vapor diffusion)

**Iridacycle-1a** (3.3 mg) was dissolved with 1 mL of  $\text{CH}_2\text{Cl}_2$  in opened inner vessel, and pentane (4 mL) as an anti-solvent has been employed in closed outer vessel. After vapor diffusion for 6 days, the single crystals of **iridacycle-1a** were obtained.

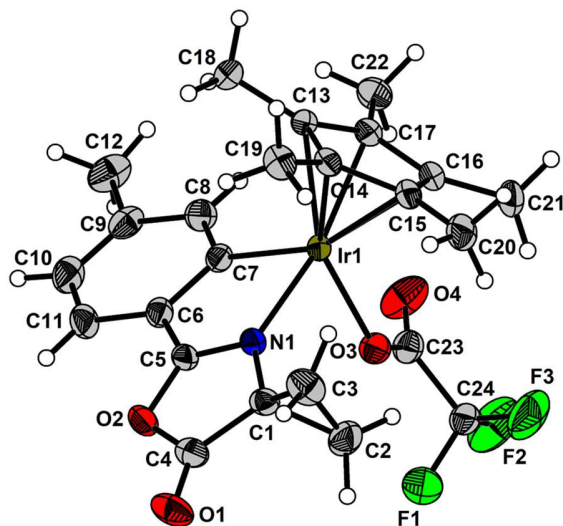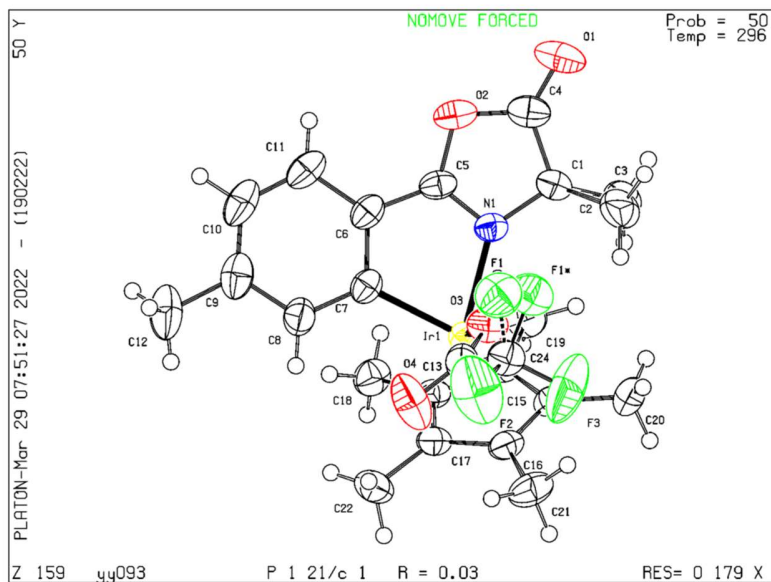

**Table S9: Data collection details for iridacycle-1a.**

| Axis  | dx/mm  | 2 $\theta$ /° | $\omega$ /° | $\varphi$ /° | $\chi$ /° | Width/° | Frames | Time/s | Wavelength/Å | Voltage/kV | Current/mA | Temperature/K |
|-------|--------|---------------|-------------|--------------|-----------|---------|--------|--------|--------------|------------|------------|---------------|
| Omega | 60.501 | 18.54         | -174.46     | -156.00      | 54.74     | 0.50    | 412    | 10.00  | 0.71073      | 50         | 30.0       | n/a           |
| Omega | 60.501 | 27.81         | -165.19     | 0.00         | 54.74     | 0.50    | 412    | 10.00  | 0.71073      | 50         | 30.0       | n/a           |
| Omega | 60.501 | 18.54         | -174.46     | 102.00       | 54.74     | 0.50    | 412    | 10.00  | 0.71073      | 50         | 30.0       | n/a           |
| Omega | 60.501 | 18.54         | -174.46     | -54.00       | 54.74     | 0.50    | 412    | 10.00  | 0.71073      | 50         | 30.0       | n/a           |
| Omega | 60.501 | 18.54         | -174.46     | 153.00       | 54.74     | 0.50    | 412    | 10.00  | 0.71073      | 50         | 30.0       | n/a           |
| Omega | 60.501 | 18.54         | -174.46     | -105.00      | 54.74     | 0.50    | 412    | 10.00  | 0.71073      | 50         | 30.0       | n/a           |
| Omega | 60.501 | 18.54         | -174.46     | 51.00        | 54.74     | 0.50    | 412    | 10.00  | 0.71073      | 50         | 30.0       | n/a           |
| Phi   | 60.501 | 18.54         | -174.46     | 0.00         | 54.74     | 0.50    | 720    | 10.00  | 0.71073      | 50         | 30.0       | n/a           |
| Phi   | 60.501 | 0.00          | 0.00        | 0.00         | 54.74     | 360.00  | 1      | 108.00 | 0.71073      | 50         | 30.0       | n/a           |

A total of 3605 frames were collected. The total exposure time was 10.04 hours. The frames were integrated with the Bruker SAINT software package using a narrow-frame algorithm. The integration of the data using a monoclinic unit cell yielded a total of 107010 reflections to a maximum  $\theta$  angle of 28.45° (0.75 Å resolution), of which 5722 were independent (average redundancy 18.702, completeness = 99.0%,  $R_{\text{int}} = 4.63\%$ ,  $R_{\text{sig}} = 1.63\%$ ) and 5480 (95.77%) were greater than  $2\sigma(F^2)$ . The final cell constants of  $a = 8.971(2)$  Å,  $b = 27.011(6)$  Å,  $c = 9.490(2)$  Å,  $\beta = 93.878(7)^\circ$ , volume = 2294.3(9) Å<sup>3</sup>, are based upon the refinement of the XYZ-centroids of 9688 reflections above 20  $\sigma(I)$  with  $5.459^\circ < 2\theta < 56.89^\circ$ . Data were corrected for absorption effects using the Multi-Scan method (SADABS). The ratio of minimum to maximum apparent transmission was 0.482. The calculated minimum and maximum transmission coefficients (based on crystal size) are 0.3210 and 0.8920.

The structure was solved and refined using the Bruker SHELXTL Software Package, using the space group P 1 21/c 1, with  $Z = 4$  for the formula unit, C<sub>24</sub>H<sub>25</sub>F<sub>3</sub>IrNO<sub>4</sub>. The final anisotropic full-matrix least-squares refinement on  $F^2$  with 314 variables converged at  $R1 = 2.61\%$ , for the observed data and  $wR2 = 5.60\%$  for all data. The goodness-of-fit was 1.178. The largest peak in the final difference electron density synthesis was 0.903 e<sup>-</sup>/Å<sup>3</sup> and the largest hole was -1.297 e<sup>-</sup>/Å<sup>3</sup> with an RMS deviation of 0.087 e<sup>-</sup>/Å<sup>3</sup>. On the basis of the final model, the calculated density was 1.855 g/cm<sup>3</sup> and  $F(000)$ , 1248 e<sup>-</sup>.

**Table S10. Sample and crystal data for iridacycle-1a.**

|                             |                                                                  |                           |
|-----------------------------|------------------------------------------------------------------|---------------------------|
| <b>Chemical formula</b>     | C <sub>24</sub> H <sub>25</sub> F <sub>3</sub> IrNO <sub>4</sub> |                           |
| <b>Formula weight</b>       | 640.65 g/mol                                                     |                           |
| <b>Temperature</b>          | 296(2) K                                                         |                           |
| <b>Wavelength</b>           | 0.71073 Å                                                        |                           |
| <b>Crystal size</b>         | 0.020 x 0.080 x 0.250 mm                                         |                           |
| <b>Crystal habit</b>        | light pink rod                                                   |                           |
| <b>Crystal system</b>       | monoclinic                                                       |                           |
| <b>Space group</b>          | P 2 <sub>1</sub> /c                                              |                           |
| <b>Unit cell dimensions</b> | $a = 8.971(2)$ Å                                                 | $\alpha = 90^\circ$       |
|                             | $b = 27.011(6)$ Å                                                | $\beta = 93.878(7)^\circ$ |
|                             | $c = 9.490(2)$ Å                                                 | $\gamma = 90^\circ$       |
| <b>Volume</b>               | 2294.3(9) Å <sup>3</sup>                                         |                           |
| <b>Z</b>                    | 4                                                                |                           |
| <b>Density (calculated)</b> | 1.855 g/cm <sup>3</sup>                                          |                           |

|                               |                        |
|-------------------------------|------------------------|
| <b>Absorption coefficient</b> | 5.874 mm <sup>-1</sup> |
| <b>F(000)</b>                 | 1248                   |

**Table S11. Data collection and structure refinement for iridacycle-1a.**

|                                            |                                                                                                                                                                       |                                                      |
|--------------------------------------------|-----------------------------------------------------------------------------------------------------------------------------------------------------------------------|------------------------------------------------------|
| <b>Theta range for data collection</b>     | 2.28 to 28.45°                                                                                                                                                        |                                                      |
| <b>Index ranges</b>                        | -11 ≤ h ≤ 11, -36 ≤ k ≤ 35, -12 ≤ l ≤ 12                                                                                                                              |                                                      |
| <b>Reflections collected</b>               | 107010                                                                                                                                                                |                                                      |
| <b>Independent reflections</b>             | 5722 [R(int) = 0.0463]                                                                                                                                                |                                                      |
| <b>Coverage of independent reflections</b> | 99.0%                                                                                                                                                                 |                                                      |
| <b>Absorption correction</b>               | Multi-Scan                                                                                                                                                            |                                                      |
| <b>Max. and min. transmission</b>          | 0.8920 and 0.3210                                                                                                                                                     |                                                      |
| <b>Structure solution technique</b>        | direct methods                                                                                                                                                        |                                                      |
| <b>Structure solution program</b>          | SHELXT 2018/2 (Sheldrick, 2018)                                                                                                                                       |                                                      |
| <b>Refinement method</b>                   | Full-matrix least-squares on F <sup>2</sup>                                                                                                                           |                                                      |
| <b>Refinement program</b>                  | SHELXL-2018/3 (Sheldrick, 2018)                                                                                                                                       |                                                      |
| <b>Function minimized</b>                  | Σ w(F <sub>o</sub> <sup>2</sup> - F <sub>c</sub> <sup>2</sup> ) <sup>2</sup>                                                                                          |                                                      |
| <b>Data / restraints / parameters</b>      | 5722 / 14 / 314                                                                                                                                                       |                                                      |
| <b>Goodness-of-fit on F<sup>2</sup></b>    | 1.178                                                                                                                                                                 |                                                      |
| <b>Δ/σ<sub>max</sub></b>                   | 0.003                                                                                                                                                                 |                                                      |
| <b>Final R indices</b>                     | 5480 data;<br>I > 2σ(I)                                                                                                                                               | R <sub>1</sub> = 0.0261, wR <sub>2</sub> =<br>0.0553 |
|                                            | all data                                                                                                                                                              | R <sub>1</sub> = 0.0278, wR <sub>2</sub> =<br>0.0560 |
| <b>Weighting scheme</b>                    | w = 1/[σ <sup>2</sup> (F <sub>o</sub> <sup>2</sup> ) + (0.0143P) <sup>2</sup> + 4.2571P]<br>where P = (F <sub>o</sub> <sup>2</sup> + 2F <sub>c</sub> <sup>2</sup> )/3 |                                                      |
| <b>Largest diff. peak and hole</b>         | 0.903 and -1.297 eÅ <sup>-3</sup>                                                                                                                                     |                                                      |
| <b>R.M.S. deviation from mean</b>          | 0.087 eÅ <sup>-3</sup>                                                                                                                                                |                                                      |

**Table S12. Atomic coordinates and equivalent isotropic atomic displacement parameters (Å<sup>2</sup>) for iridacycle-1a.**

U(eq) is defined as one third of the trace of the orthogonalized U<sub>ij</sub> tensor.

|           | <b>x/a</b> | <b>y/b</b>  | <b>z/c</b> | <b>U(eq)</b> |
|-----------|------------|-------------|------------|--------------|
| <b>C1</b> | 0.4610(4)  | 0.68736(13) | 0.1033(4)  | 0.0397(7)    |
| <b>C2</b> | 0.4418(6)  | 0.65458(18) | 0.9756(5)  | 0.0654(12)   |

|     |            |             |            |            |
|-----|------------|-------------|------------|------------|
| C3  | 0.3160(5)  | 0.66054(18) | 0.0670(5)  | 0.0626(11) |
| C4  | 0.4672(4)  | 0.74139(14) | 0.0872(4)  | 0.0476(9)  |
| C5  | 0.6206(4)  | 0.71735(12) | 0.2655(4)  | 0.0379(7)  |
| C6  | 0.7369(4)  | 0.71807(13) | 0.3752(4)  | 0.0405(7)  |
| C7  | 0.7816(4)  | 0.67003(13) | 0.4166(4)  | 0.0381(7)  |
| C8  | 0.9013(4)  | 0.66756(15) | 0.5179(4)  | 0.0486(9)  |
| C9  | 0.9668(4)  | 0.70996(17) | 0.5804(4)  | 0.0521(10) |
| C10 | 0.9140(5)  | 0.75632(17) | 0.5394(5)  | 0.0609(12) |
| C11 | 0.8011(5)  | 0.76123(15) | 0.4354(5)  | 0.0531(10) |
| C12 | 0.0944(5)  | 0.7047(2)   | 0.6917(5)  | 0.0707(14) |
| C13 | 0.5850(4)  | 0.58401(12) | 0.5216(3)  | 0.0360(7)  |
| C14 | 0.4596(4)  | 0.58260(12) | 0.4194(4)  | 0.0371(7)  |
| C15 | 0.4937(4)  | 0.54889(12) | 0.3080(4)  | 0.0400(7)  |
| C16 | 0.6401(4)  | 0.53120(12) | 0.3404(4)  | 0.0410(8)  |
| C17 | 0.6990(4)  | 0.55256(12) | 0.4714(4)  | 0.0396(7)  |
| C18 | 0.5884(5)  | 0.61084(14) | 0.6595(4)  | 0.0497(9)  |
| C19 | 0.3139(4)  | 0.60842(15) | 0.4356(5)  | 0.0514(9)  |
| C20 | 0.3899(5)  | 0.53129(16) | 0.1874(5)  | 0.0587(11) |
| C21 | 0.7221(5)  | 0.49543(15) | 0.2531(5)  | 0.0583(11) |
| C22 | 0.8436(5)  | 0.53827(16) | 0.5495(5)  | 0.0539(10) |
| C23 | 0.9071(5)  | 0.59470(15) | 0.1416(4)  | 0.0477(8)  |
| C24 | 0.9478(4)  | 0.58554(12) | 0.9891(4)  | 0.0465(8)  |
| F1  | 0.9702(18) | 0.6279(2)   | 0.9255(12) | 0.073(3)   |
| F1* | 0.9055(12) | 0.6203(3)   | 0.8975(6)  | 0.070(2)   |
| F2  | 0.0866(4)  | 0.57198(18) | 0.9794(4)  | 0.1145(14) |
| F3  | 0.8704(5)  | 0.55000(15) | 0.9292(4)  | 0.1172(15) |
| N1  | 0.5621(3)  | 0.67613(10) | 0.2223(3)  | 0.0356(6)  |
| O1  | 0.4040(4)  | 0.76866(12) | 0.0049(4)  | 0.0675(9)  |
| O2  | 0.5674(3)  | 0.75834(9)  | 0.1941(3)  | 0.0493(6)  |
| O3  | 0.7807(3)  | 0.61273(10) | 0.1458(3)  | 0.0478(6)  |
| O4  | 0.9977(4)  | 0.58236(17) | 0.2357(4)  | 0.0820(11) |
| Ir1 | 0.65405(2) | 0.61300(2)  | 0.32700(2) | 0.03164(4) |

**Table S13. Bond lengths (Å) for iridacycle-1a.**

|       |          |        |          |
|-------|----------|--------|----------|
| C1-N1 | 1.432(4) | C1-C4  | 1.469(5) |
| C1-C2 | 1.502(5) | C1-C3  | 1.508(6) |
| C2-C3 | 1.478(7) | C2-H2A | 0.97     |

|          |          |          |          |
|----------|----------|----------|----------|
| C2-H2B   | 0.97     | C3-H3A   | 0.97     |
| C3-H3B   | 0.97     | C4-O1    | 1.189(5) |
| C4-O2    | 1.387(5) | C5-N1    | 1.286(4) |
| C5-O2    | 1.367(4) | C5-C6    | 1.424(5) |
| C6-C11   | 1.404(5) | C6-C7    | 1.406(5) |
| C7-C8    | 1.394(5) | C7-Ir1   | 2.067(3) |
| C8-C9    | 1.401(5) | C8-H8    | 0.93     |
| C9-C10   | 1.385(7) | C9-C12   | 1.511(6) |
| C10-C11  | 1.373(6) | C10-H10  | 0.93     |
| C11-H11  | 0.93     | C12-H12A | 0.96     |
| C12-H12B | 0.96     | C12-H12C | 0.96     |
| C13-C17  | 1.435(5) | C13-C14  | 1.436(5) |
| C13-C18  | 1.494(5) | C13-Ir1  | 2.136(3) |
| C14-C15  | 1.443(5) | C14-C19  | 1.499(5) |
| C14-Ir1  | 2.166(3) | C15-C16  | 1.412(5) |
| C15-C20  | 1.502(5) | C15-Ir1  | 2.251(3) |
| C16-C17  | 1.438(5) | C16-C21  | 1.498(5) |
| C16-Ir1  | 2.217(3) | C17-C22  | 1.501(5) |
| C17-Ir1  | 2.152(3) | C18-H18A | 0.96     |
| C18-H18B | 0.96     | C18-H18C | 0.96     |
| C19-H19A | 0.96     | C19-H19B | 0.96     |
| C19-H19C | 0.96     | C20-H20A | 0.96     |
| C20-H20B | 0.96     | C20-H20C | 0.96     |
| C21-H21A | 0.96     | C21-H21B | 0.96     |
| C21-H21C | 0.96     | C22-H22A | 0.96     |
| C22-H22B | 0.96     | C22-H22C | 0.96     |
| C23-O4   | 1.213(5) | C23-O3   | 1.237(5) |
| C23-C24  | 1.536(5) | C24-F3   | 1.294(5) |
| C24-F2   | 1.307(5) | C24-F1   | 1.316(2) |
| C24-F1*  | 1.318(2) | N1-Ir1   | 2.113(3) |
| O3-Ir1   | 2.124(3) |          |          |

**Table S14. Bond angles (°) for iridacycle-1a.**

|          |          |           |          |
|----------|----------|-----------|----------|
| N1-C1-C4 | 105.4(3) | N1-C1-C2  | 122.9(3) |
| C4-C1-C2 | 120.3(3) | N1-C1-C3  | 124.7(3) |
| C4-C1-C3 | 119.5(3) | C2-C1-C3  | 58.8(3)  |
| C3-C2-C1 | 60.8(3)  | C3-C2-H2A | 117.7    |

|               |           |               |           |
|---------------|-----------|---------------|-----------|
| C1-C2-H2A     | 117.7     | C3-C2-H2B     | 117.7     |
| C1-C2-H2B     | 117.7     | H2A-C2-H2B    | 114.8     |
| C2-C3-C1      | 60.4(3)   | C2-C3-H3A     | 117.7     |
| C1-C3-H3A     | 117.7     | C2-C3-H3B     | 117.7     |
| C1-C3-H3B     | 117.7     | H3A-C3-H3B    | 114.9     |
| O1-C4-O2      | 122.2(4)  | O1-C4-C1      | 131.6(4)  |
| O2-C4-C1      | 106.2(3)  | N1-C5-O2      | 115.0(3)  |
| N1-C5-C6      | 120.5(3)  | O2-C5-C6      | 124.4(3)  |
| C11-C6-C7     | 123.5(4)  | C11-C6-C5     | 124.7(4)  |
| C7-C6-C5      | 111.9(3)  | C8-C7-C6      | 115.4(3)  |
| C8-C7-Ir1     | 128.9(3)  | C6-C7-Ir1     | 115.7(3)  |
| C7-C8-C9      | 122.3(4)  | C7-C8-H8      | 118.8     |
| C9-C8-H8      | 118.8     | C10-C9-C8     | 119.6(4)  |
| C10-C9-C12    | 120.7(4)  | C8-C9-C12     | 119.7(4)  |
| C11-C10-C9    | 120.7(4)  | C11-C10-H10   | 119.6     |
| C9-C10-H10    | 119.6     | C10-C11-C6    | 118.3(4)  |
| C10-C11-H11   | 120.8     | C6-C11-H11    | 120.8     |
| C9-C12-H12A   | 109.5     | C9-C12-H12B   | 109.5     |
| H12A-C12-H12B | 109.5     | C9-C12-H12C   | 109.5     |
| H12A-C12-H12C | 109.5     | H12B-C12-H12C | 109.5     |
| C17-C13-C14   | 107.7(3)  | C17-C13-C18   | 127.2(3)  |
| C14-C13-C18   | 125.0(3)  | C17-C13-Ir1   | 71.04(19) |
| C14-C13-Ir1   | 71.66(19) | C18-C13-Ir1   | 126.1(2)  |
| C13-C14-C15   | 108.5(3)  | C13-C14-C19   | 124.6(3)  |
| C15-C14-C19   | 126.7(3)  | C13-C14-Ir1   | 69.36(19) |
| C15-C14-Ir1   | 74.1(2)   | C19-C14-Ir1   | 126.7(2)  |
| C16-C15-C14   | 107.1(3)  | C16-C15-C20   | 125.3(3)  |
| C14-C15-C20   | 127.3(4)  | C16-C15-Ir1   | 70.3(2)   |
| C14-C15-Ir1   | 67.79(18) | C20-C15-Ir1   | 131.6(3)  |
| C15-C16-C17   | 109.6(3)  | C15-C16-C21   | 125.6(3)  |
| C17-C16-C21   | 124.9(4)  | C15-C16-Ir1   | 72.87(19) |
| C17-C16-Ir1   | 68.34(19) | C21-C16-Ir1   | 125.4(3)  |
| C13-C17-C16   | 107.2(3)  | C13-C17-C22   | 126.9(3)  |
| C16-C17-C22   | 125.3(3)  | C13-C17-Ir1   | 69.85(18) |
| C16-C17-Ir1   | 73.3(2)   | C22-C17-Ir1   | 128.9(3)  |
| C13-C18-H18A  | 109.5     | C13-C18-H18B  | 109.5     |
| H18A-C18-H18B | 109.5     | C13-C18-H18C  | 109.5     |
| H18A-C18-H18C | 109.5     | H18B-C18-H18C | 109.5     |



|               |            |               |            |
|---------------|------------|---------------|------------|
| C14-C19-H19A  | 109.5      | C14-C19-H19B  | 109.5      |
| H19A-C19-H19B | 109.5      | C14-C19-H19C  | 109.5      |
| H19A-C19-H19C | 109.5      | H19B-C19-H19C | 109.5      |
| C15-C20-H20A  | 109.5      | C15-C20-H20B  | 109.5      |
| H20A-C20-H20B | 109.5      | C15-C20-H20C  | 109.5      |
| H20A-C20-H20C | 109.5      | H20B-C20-H20C | 109.5      |
| C16-C21-H21A  | 109.5      | C16-C21-H21B  | 109.5      |
| H21A-C21-H21B | 109.5      | C16-C21-H21C  | 109.5      |
| H21A-C21-H21C | 109.5      | H21B-C21-H21C | 109.5      |
| C17-C22-H22A  | 109.5      | C17-C22-H22B  | 109.5      |
| H22A-C22-H22B | 109.5      | C17-C22-H22C  | 109.5      |
| H22A-C22-H22C | 109.5      | H22B-C22-H22C | 109.5      |
| O4-C23-O3     | 130.8(4)   | O4-C23-C24    | 117.3(4)   |
| O3-C23-C24    | 111.8(3)   | F3-C24-F2     | 104.3(4)   |
| F3-C24-F1     | 122.6(8)   | F2-C24-F1     | 92.1(7)    |
| F3-C24-F1*    | 96.7(6)    | F2-C24-F1*    | 112.7(5)   |
| F3-C24-C23    | 112.2(3)   | F2-C24-C23    | 113.6(3)   |
| F1-C24-C23    | 110.2(5)   | F1*-C24-C23   | 115.5(4)   |
| C5-N1-C1      | 106.9(3)   | C5-N1-Ir1     | 114.3(2)   |
| C1-N1-Ir1     | 138.4(2)   | C5-O2-C4      | 106.4(3)   |
| C23-O3-Ir1    | 124.7(3)   | C7-Ir1-N1     | 77.27(13)  |
| C7-Ir1-O3     | 91.36(12)  | N1-Ir1-O3     | 80.53(10)  |
| C7-Ir1-C13    | 95.89(13)  | N1-Ir1-C13    | 125.14(12) |
| O3-Ir1-C13    | 154.28(11) | C7-Ir1-C17    | 103.23(14) |
| N1-Ir1-C17    | 164.16(12) | O3-Ir1-C17    | 115.18(12) |
| C13-Ir1-C17   | 39.11(12)  | C7-Ir1-C14    | 123.69(13) |
| N1-Ir1-C14    | 101.34(12) | O3-Ir1-C14    | 144.66(12) |
| C13-Ir1-C14   | 38.97(13)  | C17-Ir1-C14   | 64.91(13)  |
| C7-Ir1-C16    | 138.66(14) | N1-Ir1-C16    | 144.05(12) |
| O3-Ir1-C16    | 94.51(12)  | C13-Ir1-C16   | 64.16(13)  |
| C17-Ir1-C16   | 38.39(13)  | C14-Ir1-C16   | 63.18(13)  |
| C7-Ir1-C15    | 159.95(13) | N1-Ir1-C15    | 110.85(12) |
| O3-Ir1-C15    | 107.85(12) | C13-Ir1-C15   | 64.28(13)  |
| C17-Ir1-C15   | 63.80(13)  | C14-Ir1-C15   | 38.09(13)  |
| C16-Ir1-C15   | 36.84(13)  |               |            |

**Table S15. Anisotropic atomic displacement parameters ( $\text{\AA}^2$ ) for iridacycle-1a.**

The anisotropic atomic displacement factor exponent takes the form: -  
 $2\pi^2 [ h^2 a^{*2} U_{11} + \dots + 2 h k a^* b^* U_{12} ]$

|     | $U_{11}$   | $U_{22}$   | $U_{33}$   | $U_{23}$    | $U_{13}$    | $U_{12}$    |
|-----|------------|------------|------------|-------------|-------------|-------------|
| C1  | 0.0411(18) | 0.0399(18) | 0.0383(17) | 0.0055(14)  | 0.0048(14)  | 0.0079(14)  |
| C2  | 0.088(3)   | 0.064(3)   | 0.042(2)   | -0.004(2)   | -0.009(2)   | 0.017(3)    |
| C3  | 0.055(2)   | 0.060(3)   | 0.070(3)   | 0.009(2)    | -0.012(2)   | 0.000(2)    |
| C4  | 0.045(2)   | 0.045(2)   | 0.054(2)   | 0.0105(17)  | 0.0168(17)  | 0.0103(16)  |
| C5  | 0.0459(19) | 0.0306(16) | 0.0388(17) | 0.0030(13)  | 0.0143(14)  | 0.0033(13)  |
| C6  | 0.0427(18) | 0.0370(17) | 0.0431(18) | -0.0054(14) | 0.0118(15)  | -0.0080(14) |
| C7  | 0.0409(18) | 0.0376(17) | 0.0365(16) | -0.0048(13) | 0.0082(13)  | -0.0062(14) |
| C8  | 0.051(2)   | 0.049(2)   | 0.045(2)   | -0.0019(16) | -0.0032(16) | -0.0111(17) |
| C9  | 0.046(2)   | 0.070(3)   | 0.0416(19) | -0.0082(18) | 0.0105(16)  | -0.0210(19) |
| C10 | 0.067(3)   | 0.057(3)   | 0.060(3)   | -0.016(2)   | 0.014(2)    | -0.031(2)   |
| C11 | 0.061(2)   | 0.0380(19) | 0.062(2)   | -0.0071(17) | 0.016(2)    | -0.0161(17) |
| C12 | 0.058(3)   | 0.102(4)   | 0.052(2)   | -0.009(2)   | 0.000(2)    | -0.033(3)   |
| C13 | 0.0435(18) | 0.0320(15) | 0.0331(15) | 0.0020(12)  | 0.0072(13)  | 0.0033(13)  |
| C14 | 0.0384(17) | 0.0297(15) | 0.0436(18) | 0.0021(13)  | 0.0046(14)  | -0.0013(13) |
| C15 | 0.0478(19) | 0.0301(16) | 0.0418(18) | -0.0017(13) | 0.0009(15)  | -0.0043(14) |
| C16 | 0.053(2)   | 0.0283(15) | 0.0419(18) | -0.0006(13) | 0.0062(15)  | 0.0001(14)  |
| C17 | 0.0459(19) | 0.0325(16) | 0.0405(17) | 0.0034(13)  | 0.0037(14)  | 0.0052(14)  |
| C18 | 0.066(3)   | 0.047(2)   | 0.0372(18) | -0.0048(16) | 0.0091(17)  | -0.0015(18) |
| C19 | 0.041(2)   | 0.047(2)   | 0.066(3)   | 0.0004(18)  | 0.0088(18)  | 0.0002(16)  |
| C20 | 0.072(3)   | 0.045(2)   | 0.057(2)   | -0.0088(18) | -0.011(2)   | -0.013(2)   |
| C21 | 0.077(3)   | 0.037(2)   | 0.063(3)   | -0.0115(18) | 0.020(2)    | 0.0079(19)  |
| C22 | 0.054(2)   | 0.051(2)   | 0.055(2)   | 0.0091(18)  | -0.0045(18) | 0.0117(18)  |
| C23 | 0.047(2)   | 0.050(2)   | 0.046(2)   | -0.0052(17) | -0.0016(16) | -0.0014(17) |

|     |            |            |            |             |             |             |
|-----|------------|------------|------------|-------------|-------------|-------------|
| C24 | 0.047(2)   | 0.048(2)   | 0.0454(19) | -0.0022(16) | 0.0086(16)  | 0.0048(17)  |
| F1  | 0.076(4)   | 0.073(4)   | 0.073(4)   | 0.0049(18)  | 0.0130(19)  | -0.0064(18) |
| F1* | 0.073(3)   | 0.072(3)   | 0.064(3)   | 0.0065(16)  | 0.0056(17)  | 0.0078(17)  |
| F2  | 0.067(2)   | 0.184(4)   | 0.093(2)   | -0.034(3)   | 0.0129(18)  | 0.037(2)    |
| F3  | 0.151(4)   | 0.127(3)   | 0.075(2)   | -0.049(2)   | 0.018(2)    | -0.066(3)   |
| N1  | 0.0399(15) | 0.0304(13) | 0.0368(14) | 0.0006(11)  | 0.0056(11)  | 0.0038(11)  |
| O1  | 0.0643(19) | 0.0584(18) | 0.080(2)   | 0.0307(16)  | 0.0086(16)  | 0.0199(15)  |
| O2  | 0.0592(17) | 0.0315(12) | 0.0591(16) | 0.0071(11)  | 0.0170(13)  | 0.0040(11)  |
| O3  | 0.0485(15) | 0.0476(15) | 0.0489(14) | 0.0019(12)  | 0.0148(12)  | 0.0087(12)  |
| O4  | 0.0548(19) | 0.135(4)   | 0.0550(19) | -0.009(2)   | -0.0089(15) | 0.021(2)    |
| Ir1 | 0.03502(7) | 0.02800(6) | 0.03190(7) | -0.00241(5) | 0.00222(4)  | 0.00109(5)  |

**Table S16. Hydrogen atomic coordinates and isotropic atomic displacement parameters ( $\text{\AA}^2$ ) for iridacycle-1a.**

|      | x/a    | y/b    | z/c     | U(eq) |
|------|--------|--------|---------|-------|
| H2A  | 0.4335 | 0.6704 | -0.1164 | 0.078 |
| H2B  | 0.4940 | 0.6231 | -0.0215 | 0.078 |
| H3A  | 0.2916 | 0.6327 | 0.1259  | 0.075 |
| H3B  | 0.2310 | 0.6800 | 0.0309  | 0.075 |
| H8   | 0.9389 | 0.6367 | 0.5451  | 0.058 |
| H10  | 0.9555 | 0.7844 | 0.5829  | 0.073 |
| H11  | 0.7679 | 0.7924 | 0.4054  | 0.064 |
| H12A | 1.1870 | 0.7116 | 0.6506  | 0.106 |
| H12B | 1.0963 | 0.6715 | 0.7281  | 0.106 |
| H12C | 1.0810 | 0.7276 | 0.7672  | 0.106 |
| H18A | 0.5624 | 0.5884 | 0.7324  | 0.074 |
| H18B | 0.5179 | 0.6376 | 0.6528  | 0.074 |
| H18C | 0.6869 | 0.6237 | 0.6819  | 0.074 |
| H19A | 0.2658 | 0.5942 | 0.5134  | 0.077 |
| H19B | 0.2507 | 0.6046 | 0.3505  | 0.077 |
| H19C | 0.3318 | 0.6430 | 0.4533  | 0.077 |
| H20A | 0.4395 | 0.5333 | 0.1011  | 0.088 |
| H20B | 0.3022 | 0.5518 | 0.1804  | 0.088 |
| H20C | 0.3617 | 0.4976 | 0.2038  | 0.088 |

|      |        |        |        |       |
|------|--------|--------|--------|-------|
| H21A | 0.6938 | 0.4622 | 0.2754 | 0.087 |
| H21B | 0.8277 | 0.4994 | 0.2730 | 0.087 |
| H21C | 0.6973 | 0.5017 | 0.1547 | 0.087 |
| H22A | 0.8601 | 0.5588 | 0.6316 | 0.081 |
| H22B | 0.9241 | 0.5426 | 0.4890 | 0.081 |
| H22C | 0.8391 | 0.5042 | 0.5779 | 0.081 |

# $^1\text{H}$ , $^{13}\text{C}$ and $^{19}\text{F}$ NMR spectra of all compounds

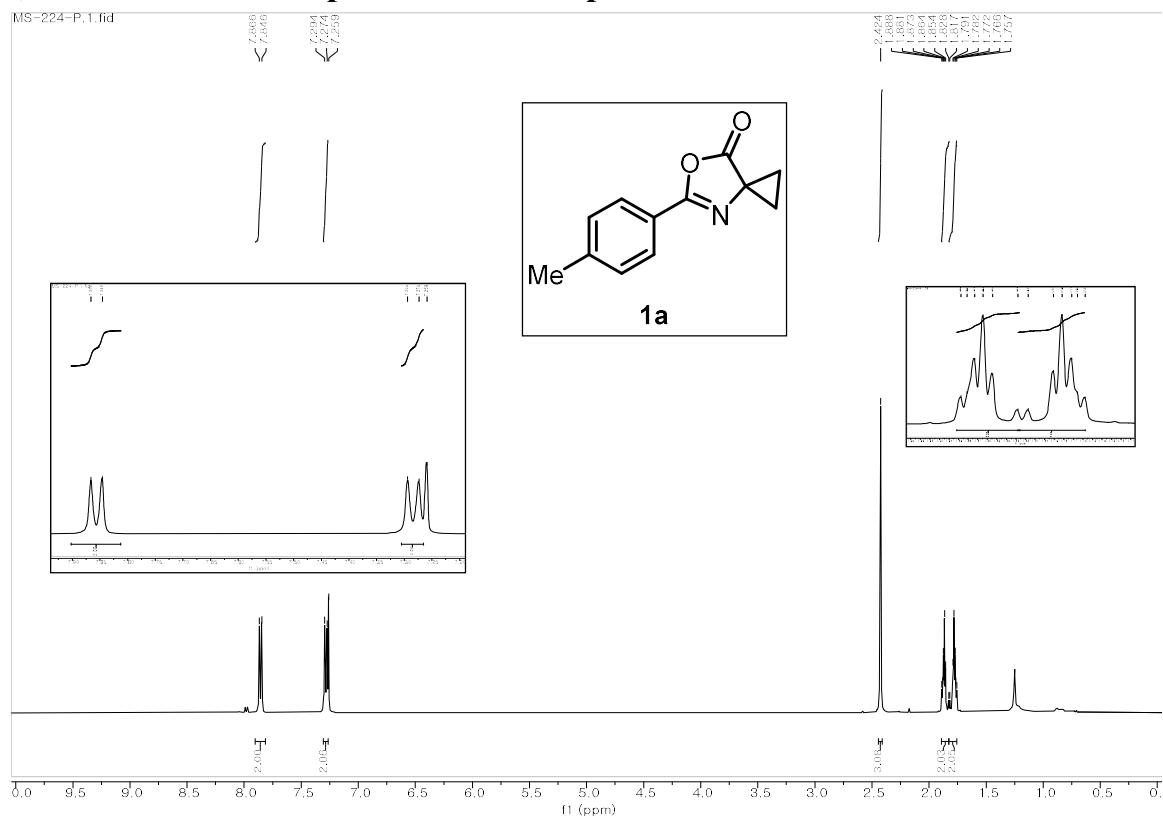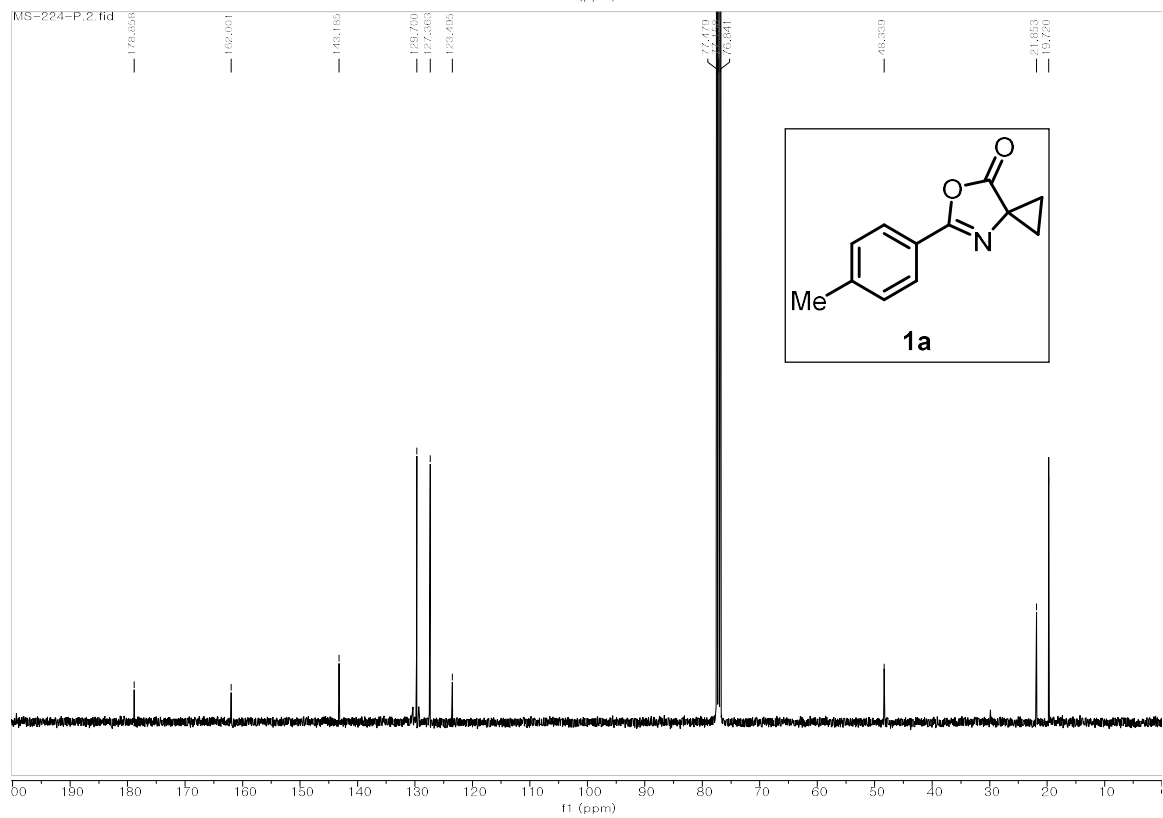

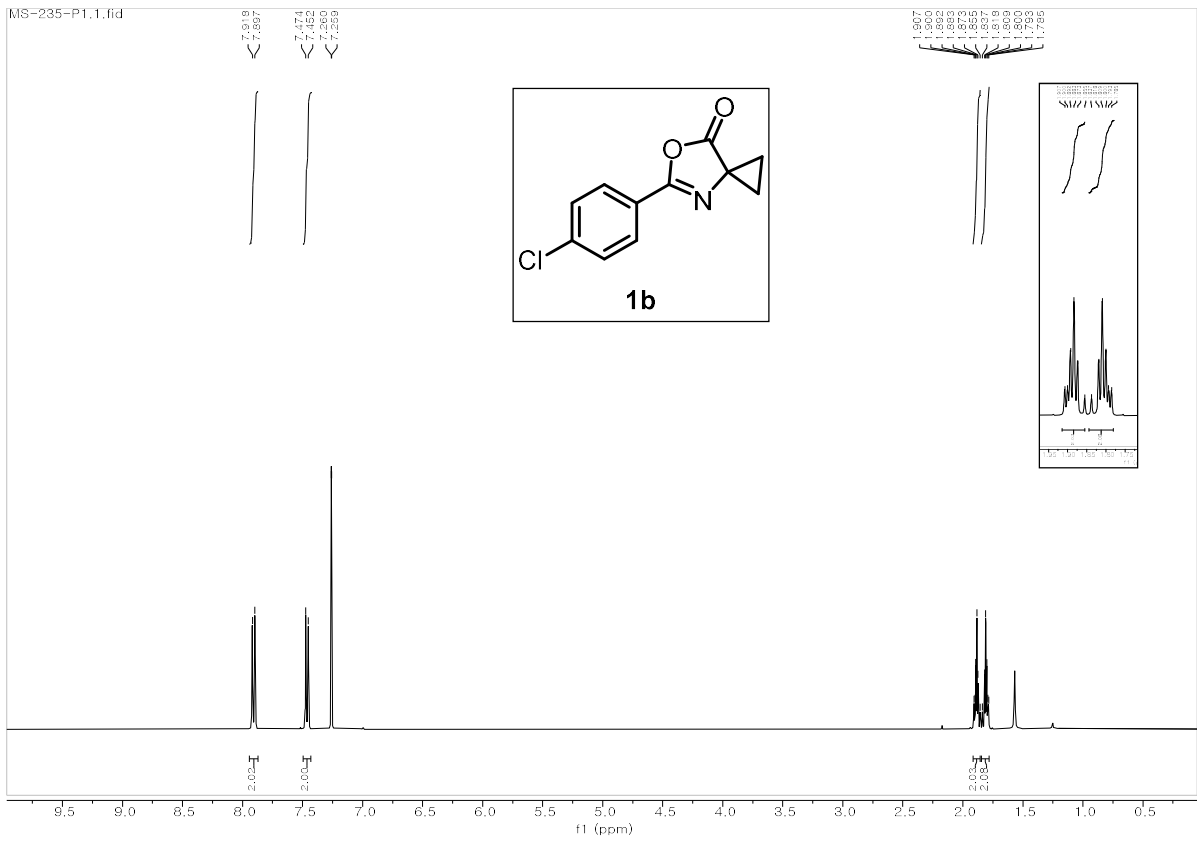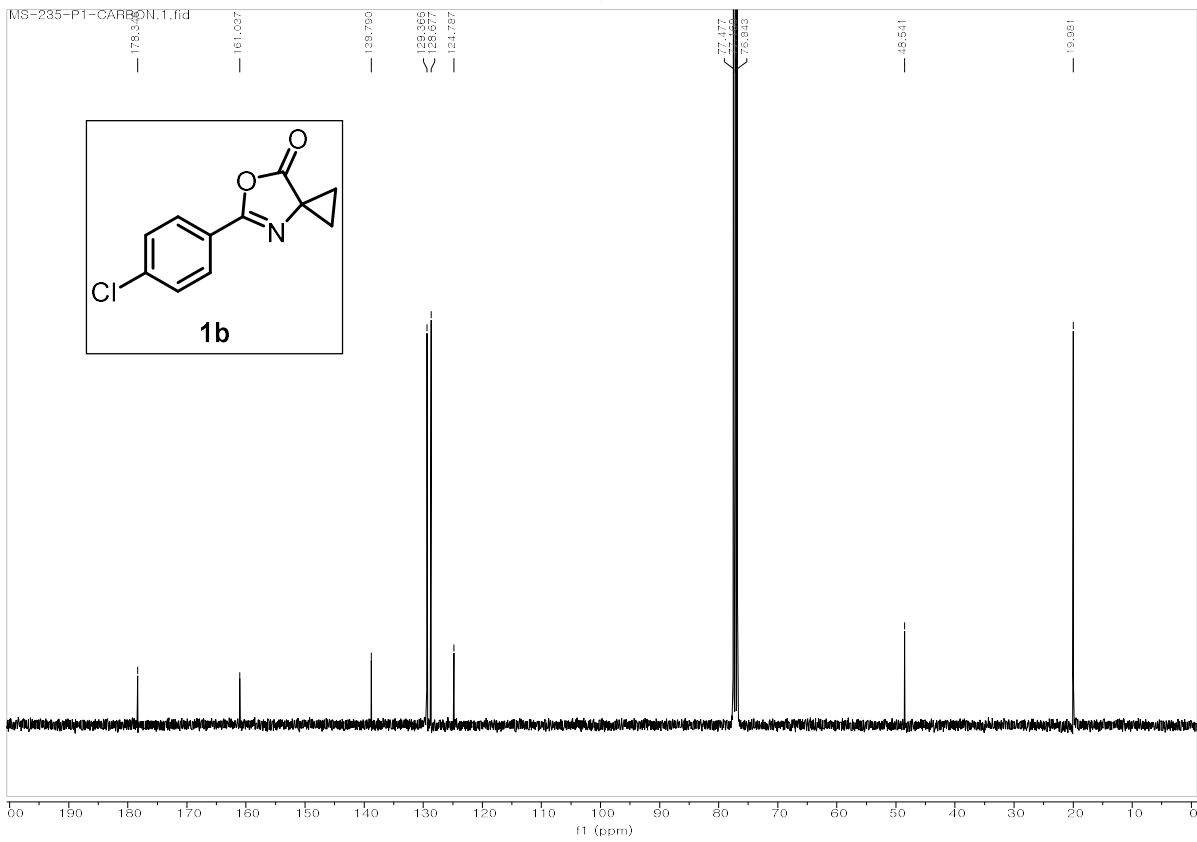

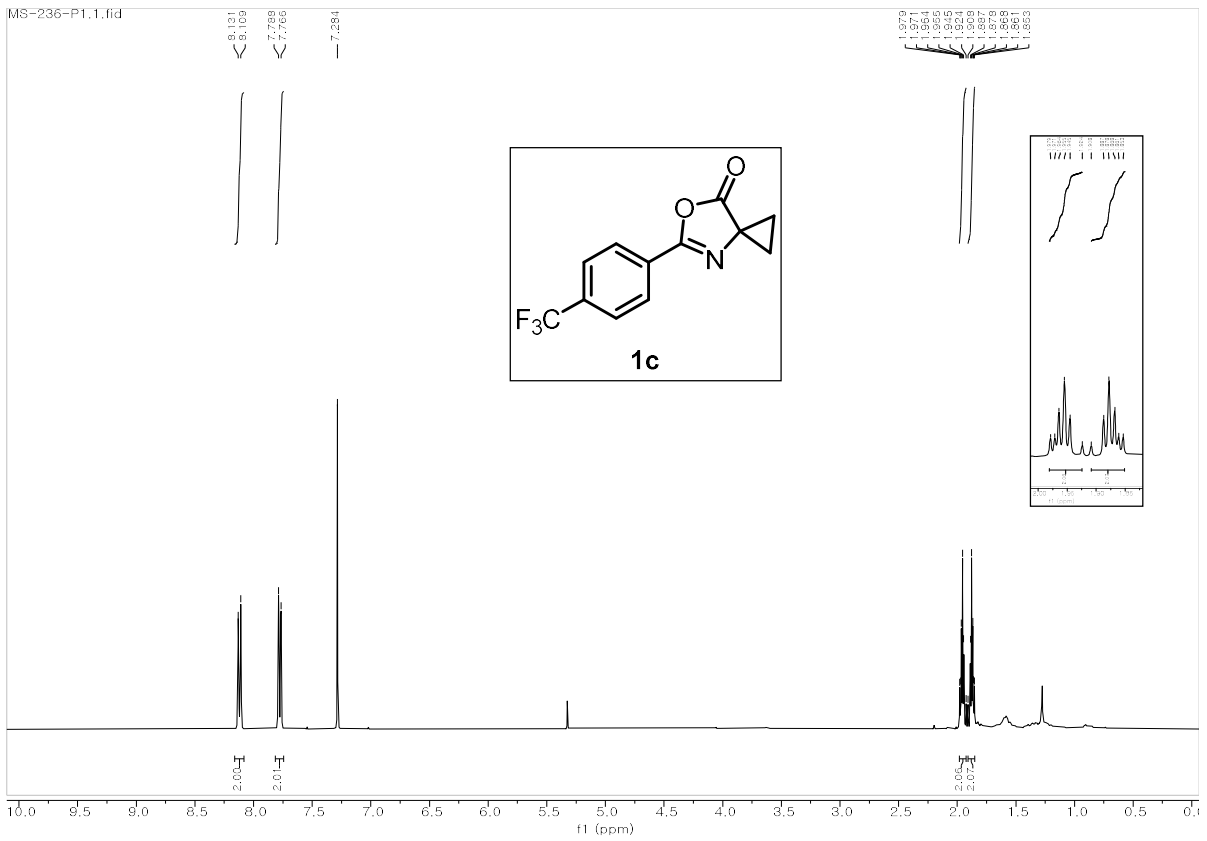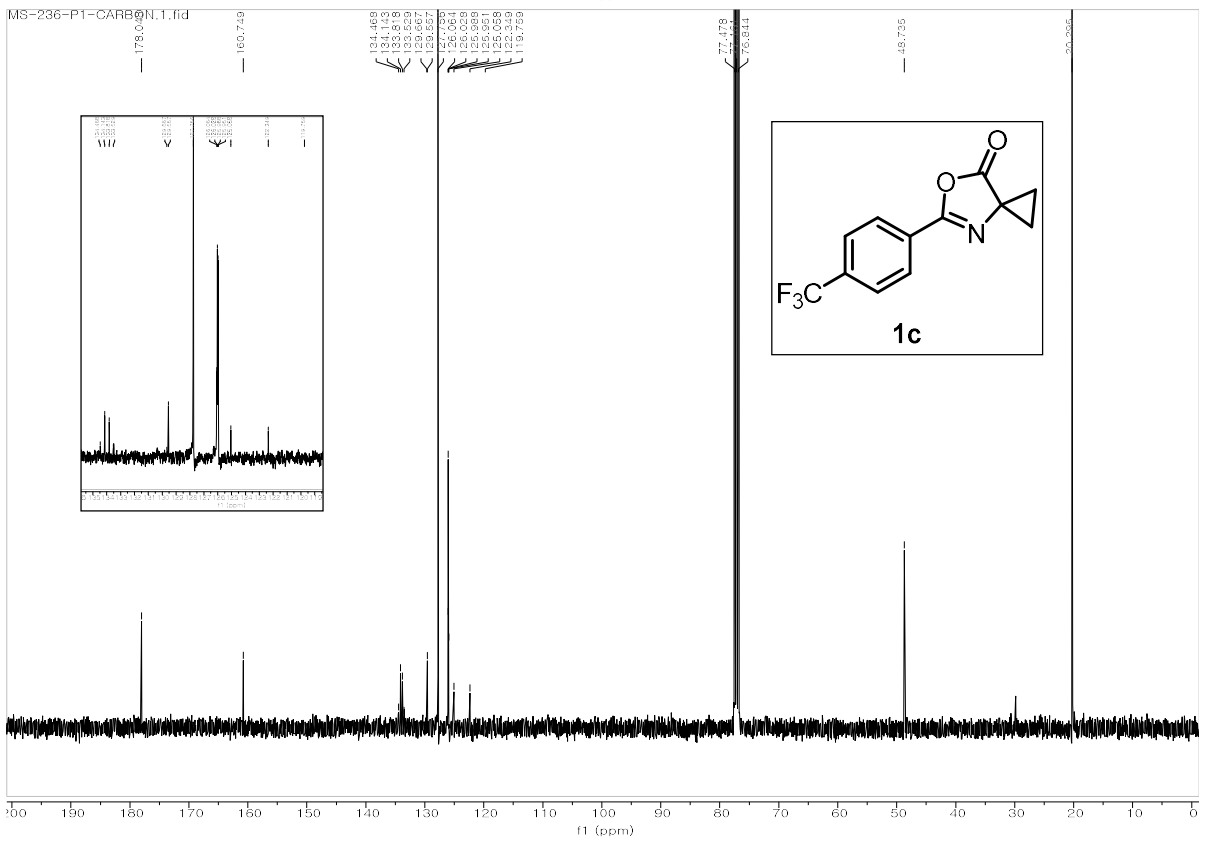

1c\_MS-236-P1\_400MHz.3.fid

100.188

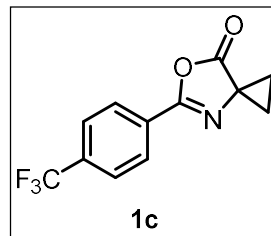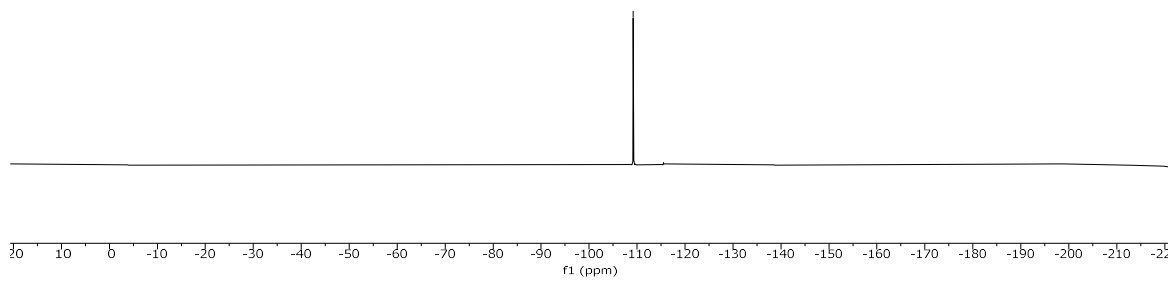



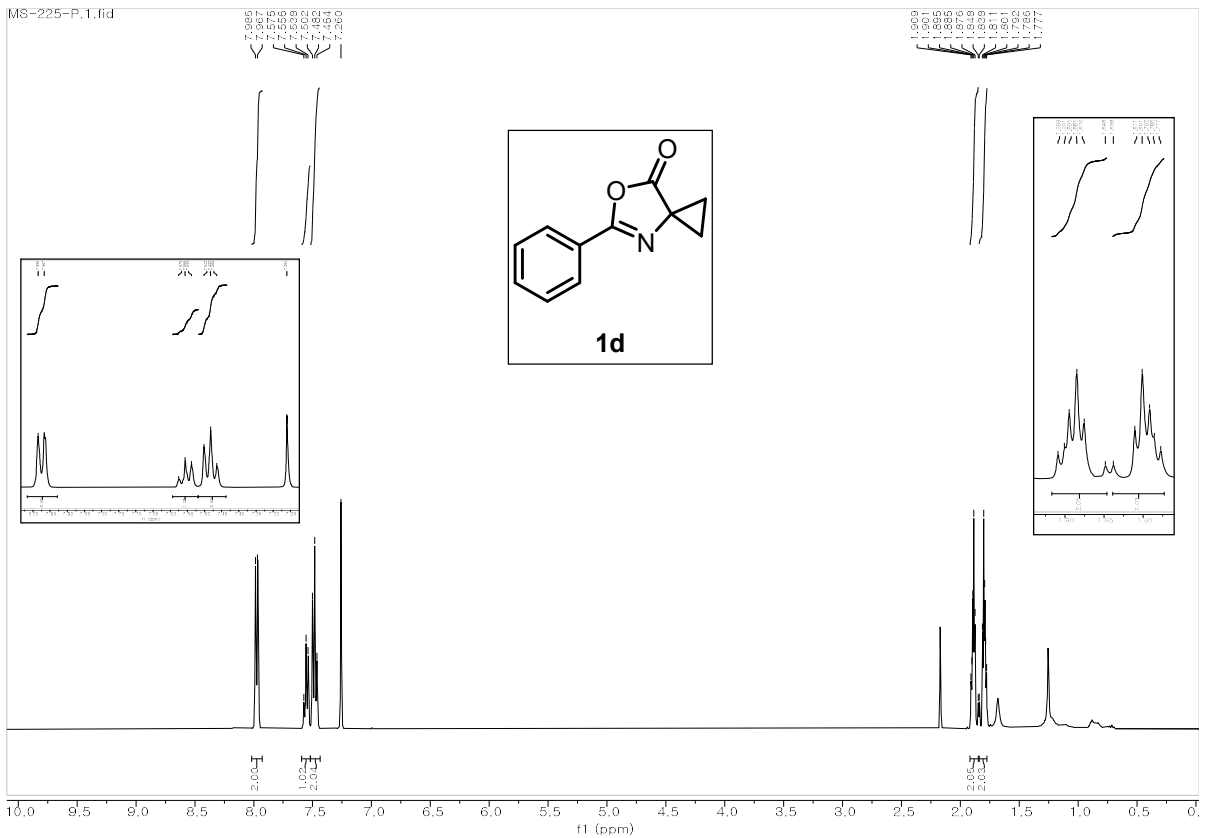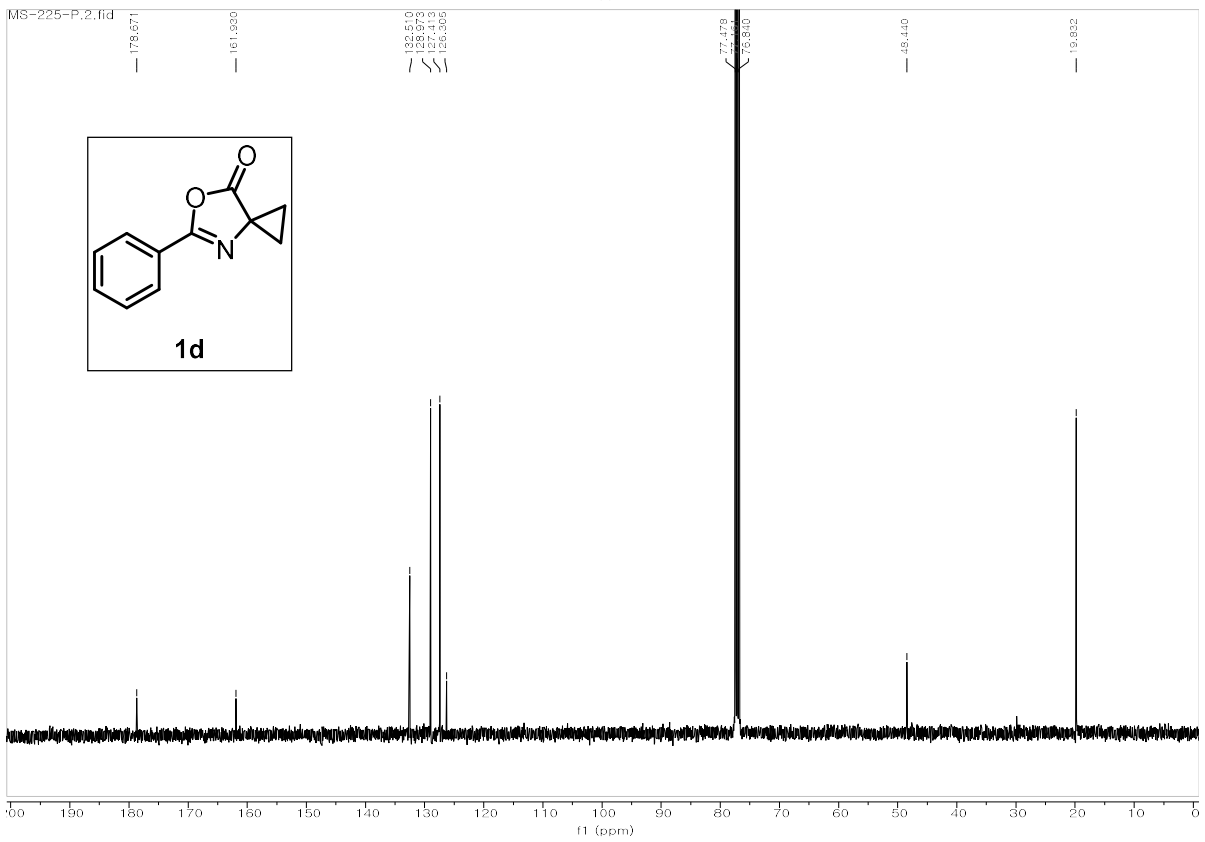

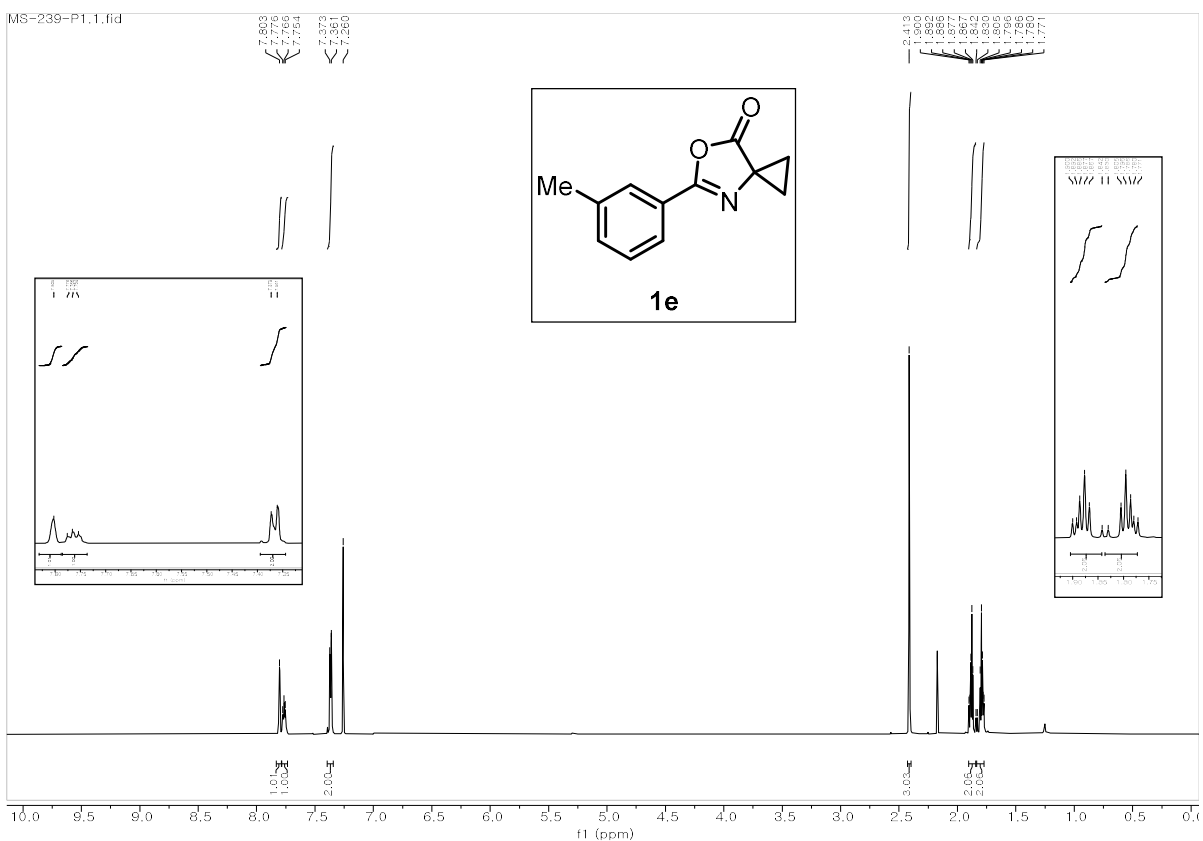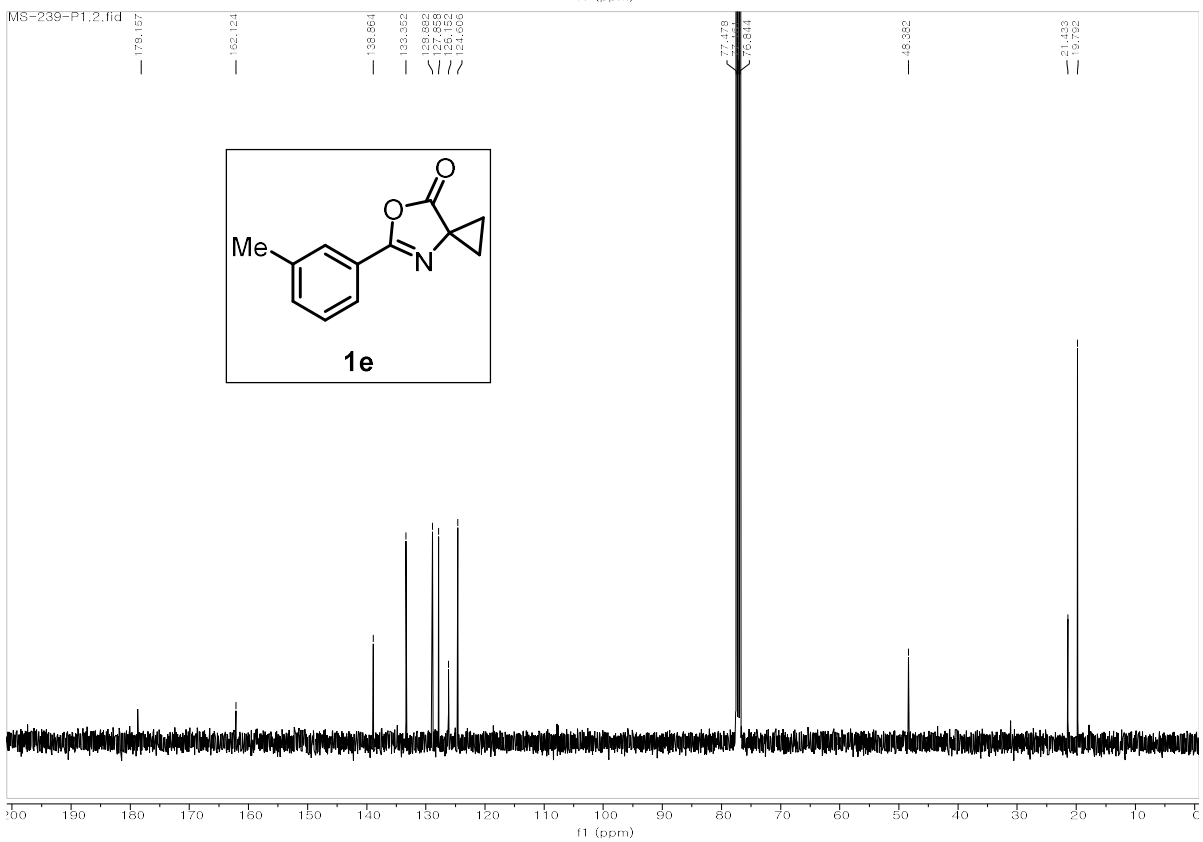

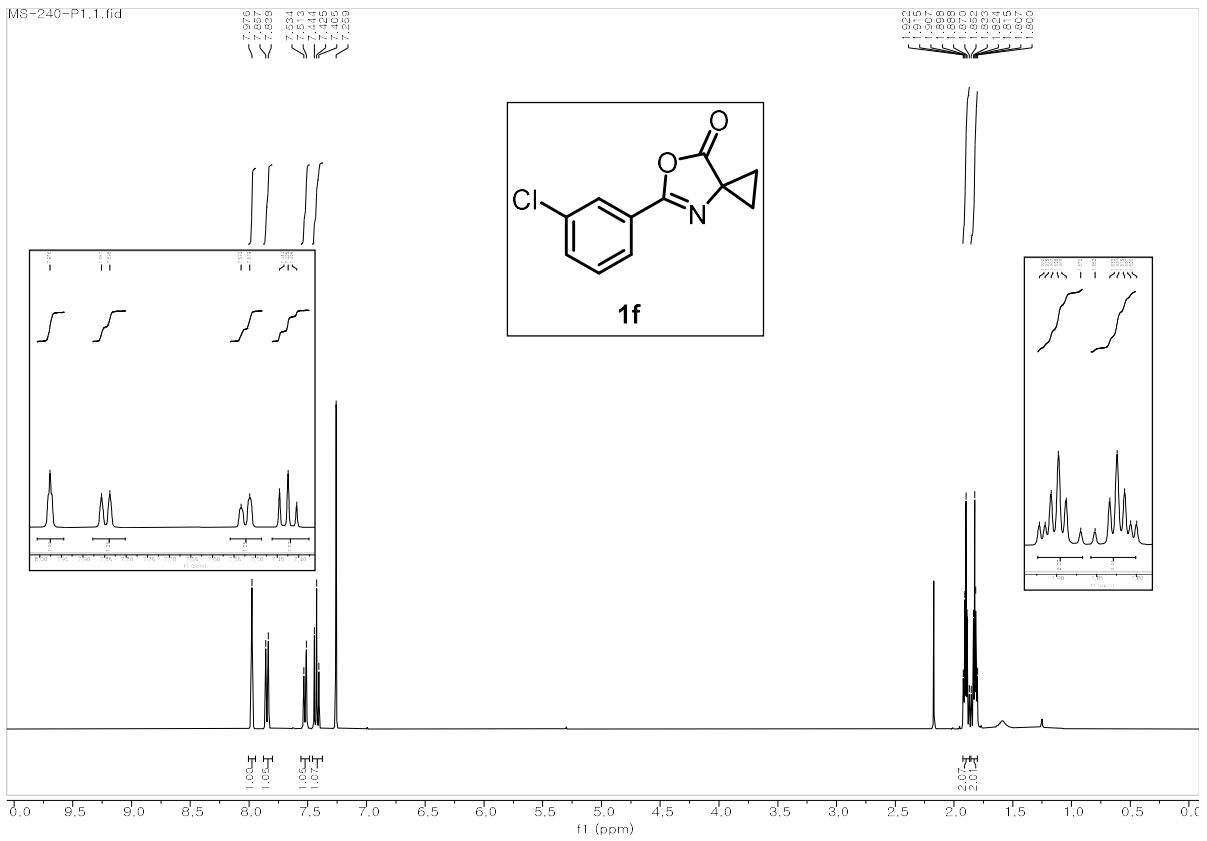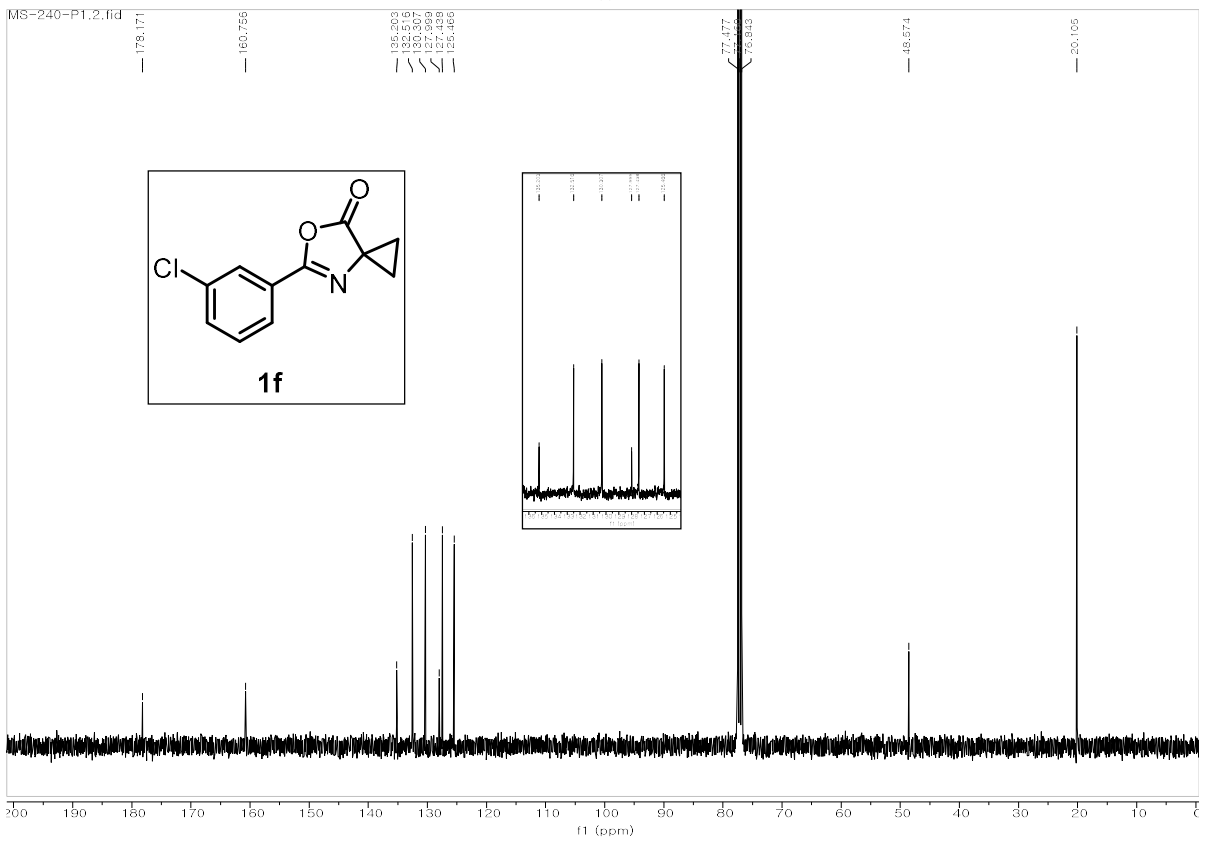

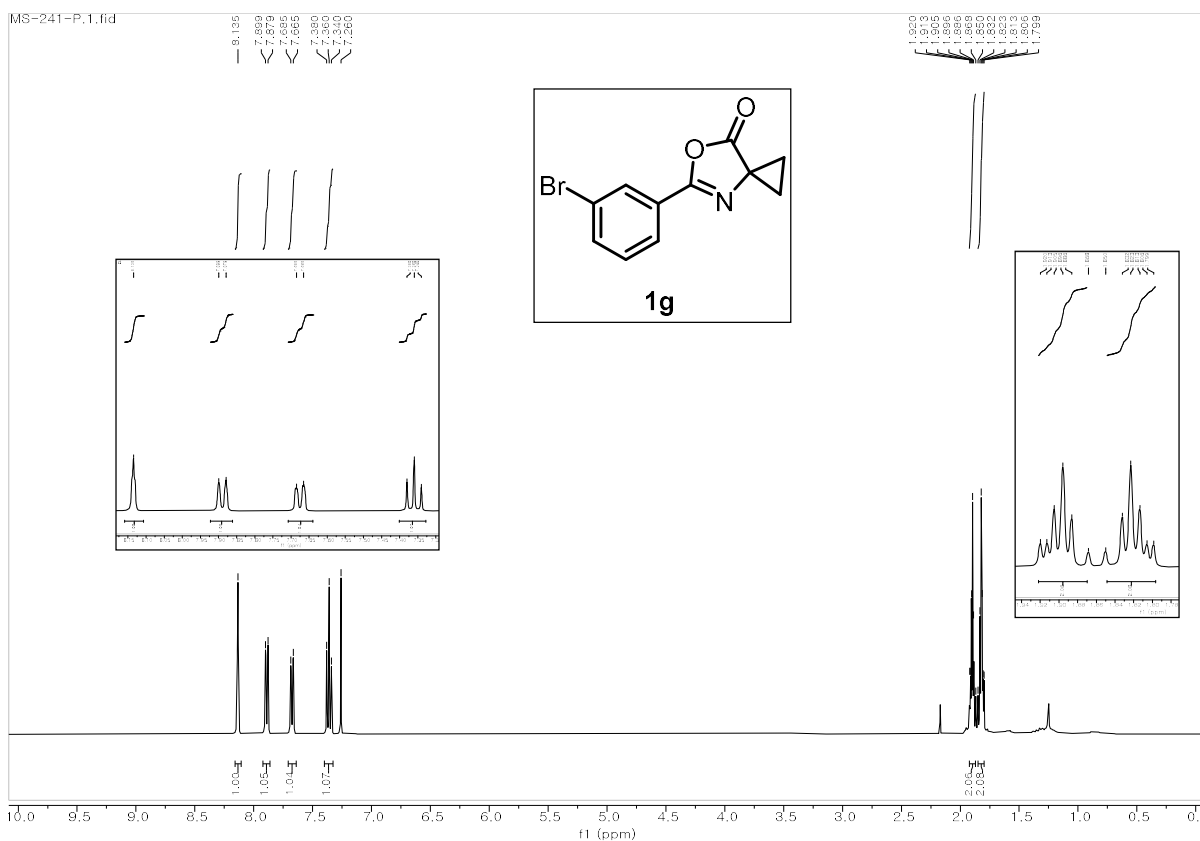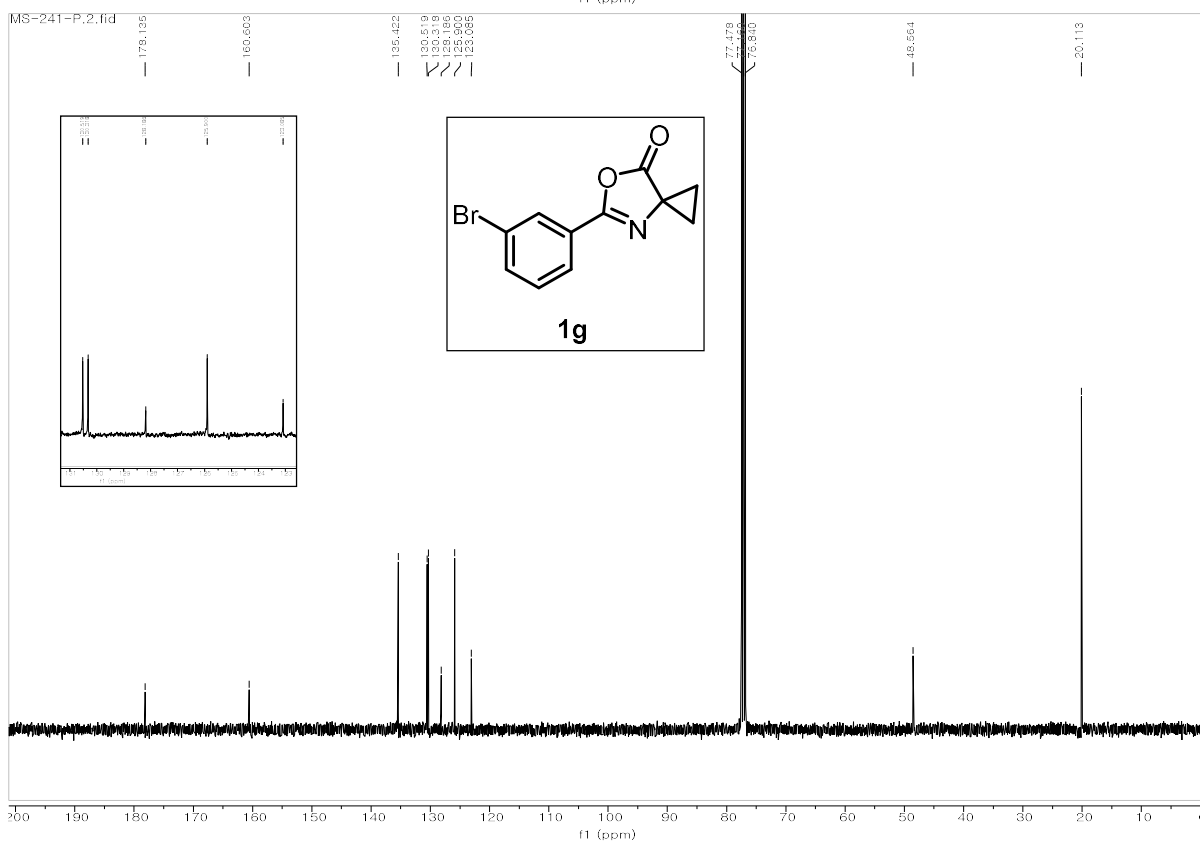

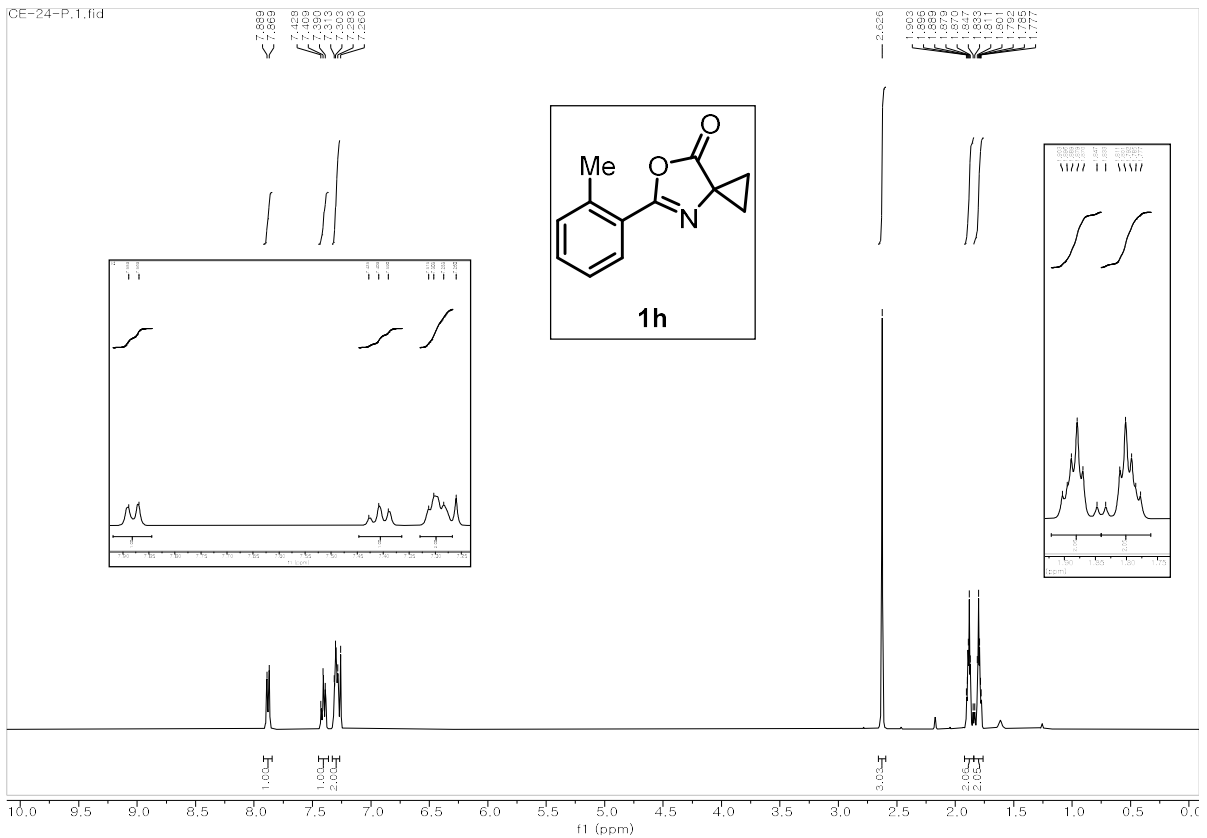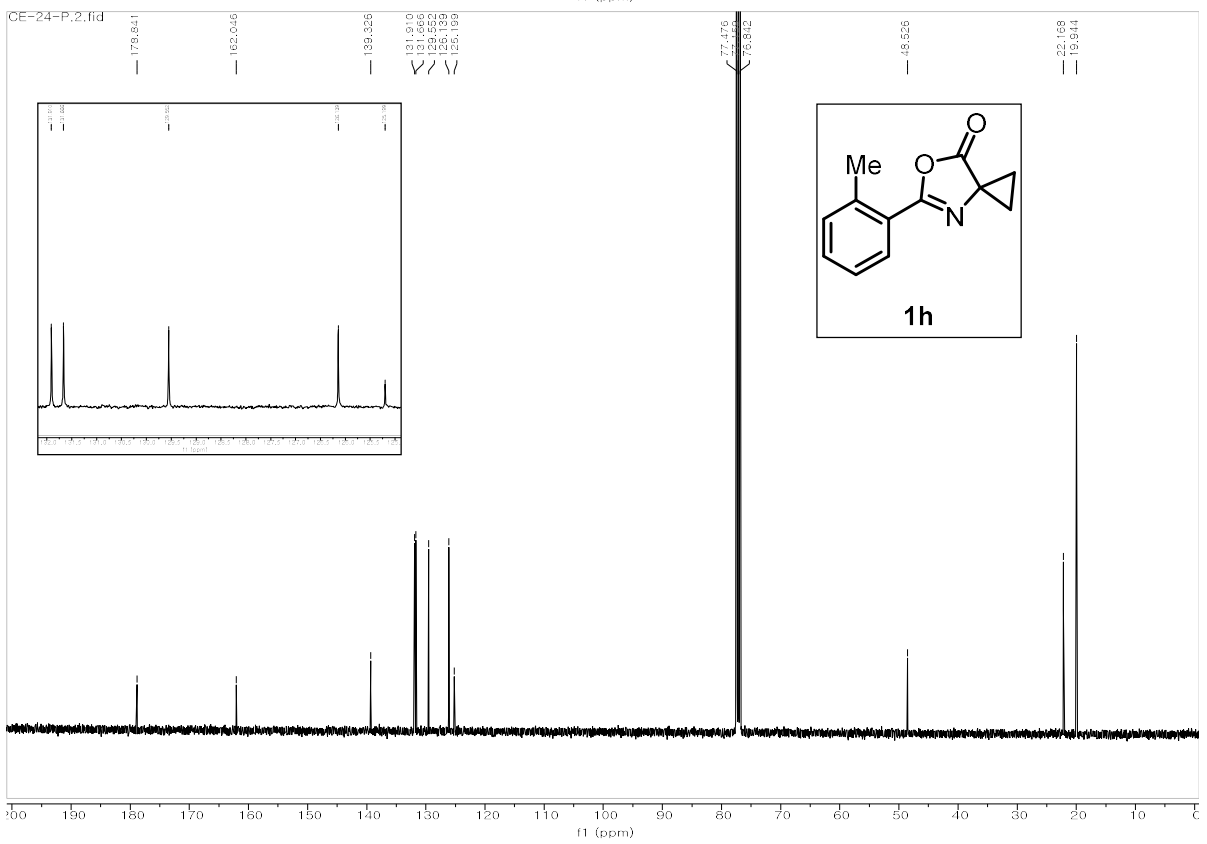

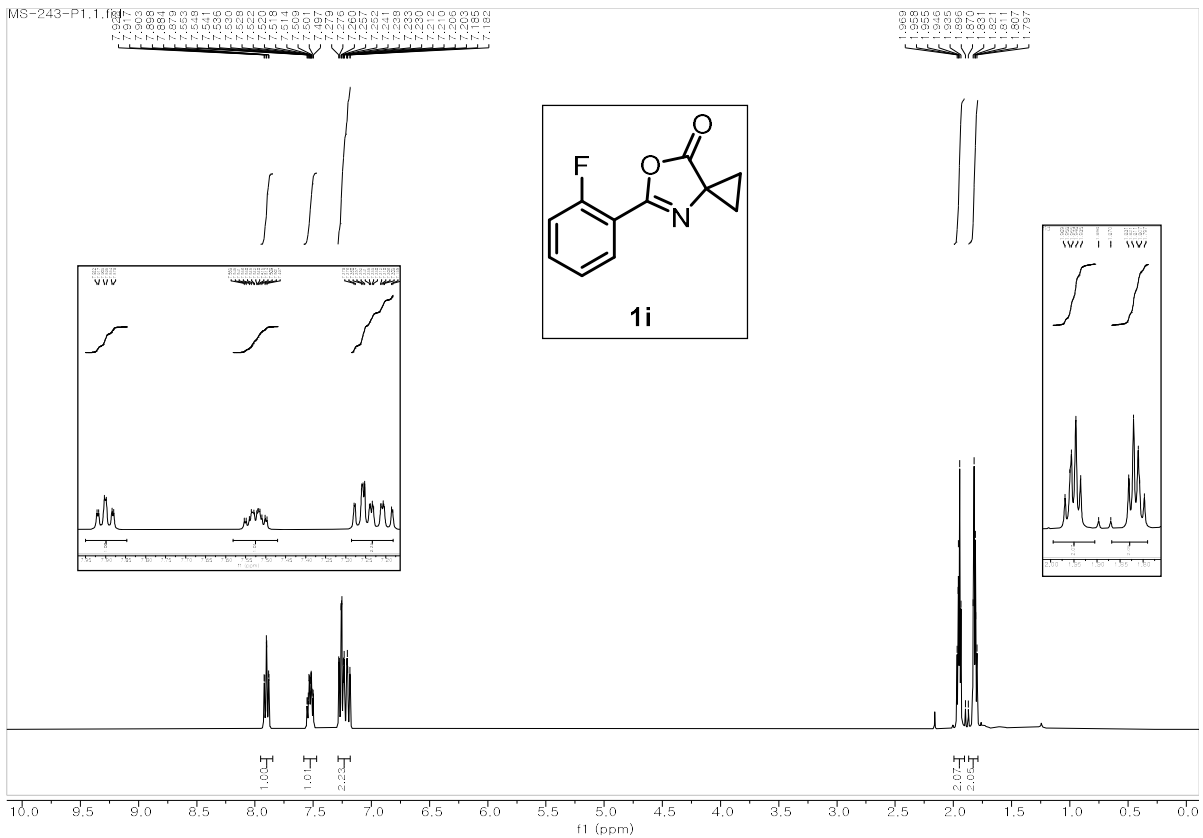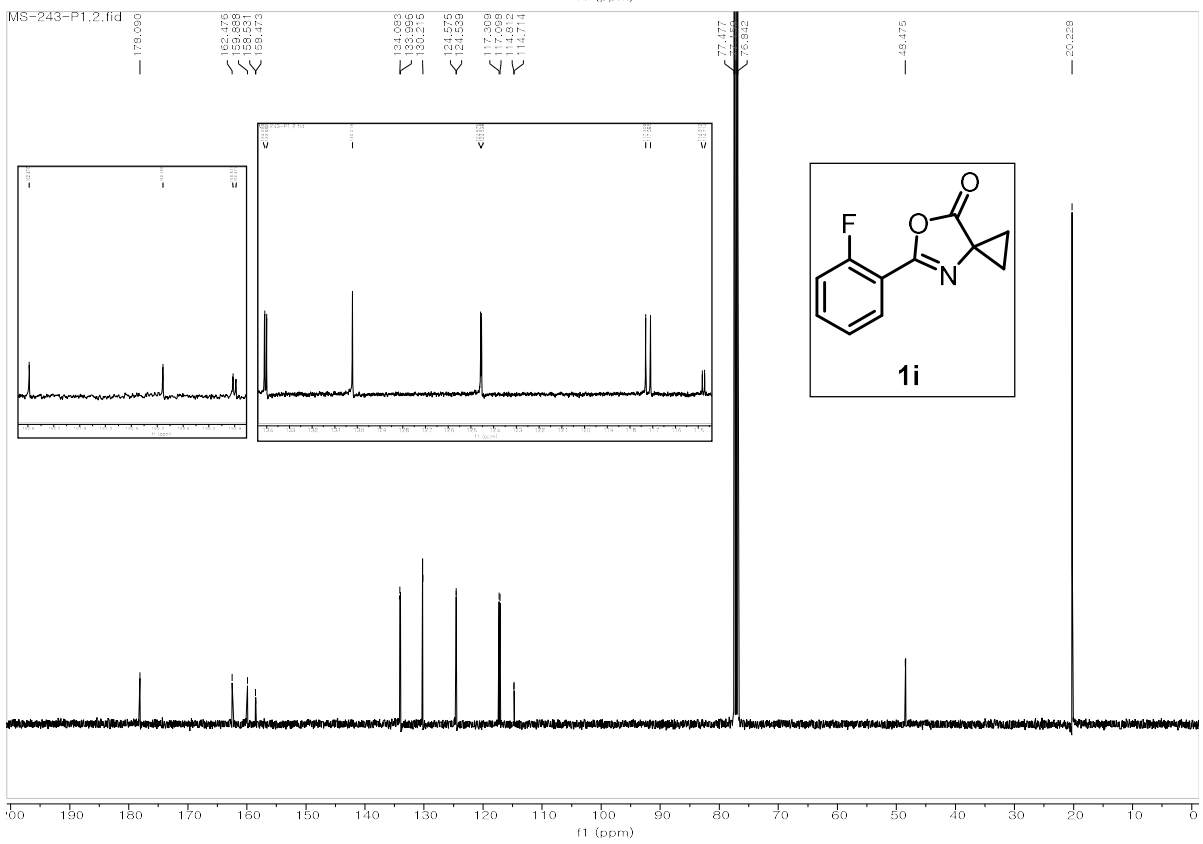

1i. MS-243-P1\_400MHz.3.fid

100.188

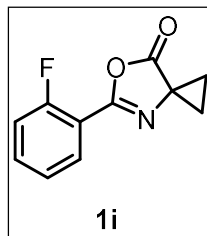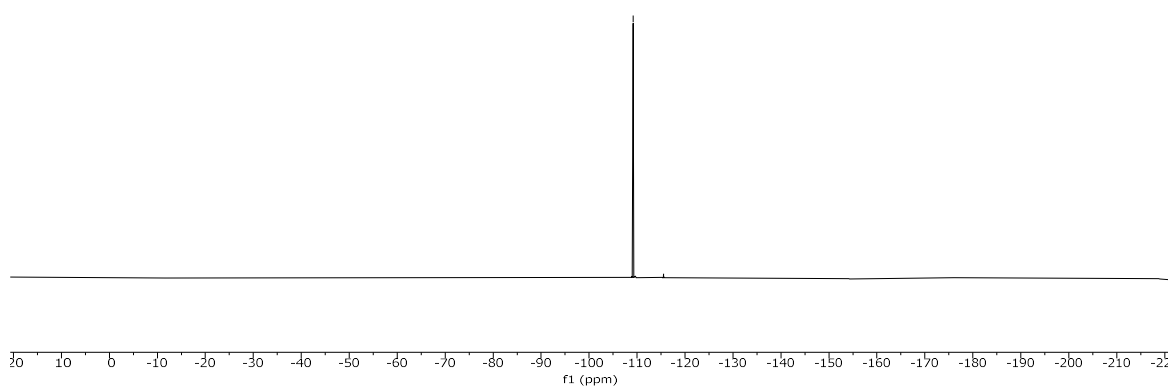

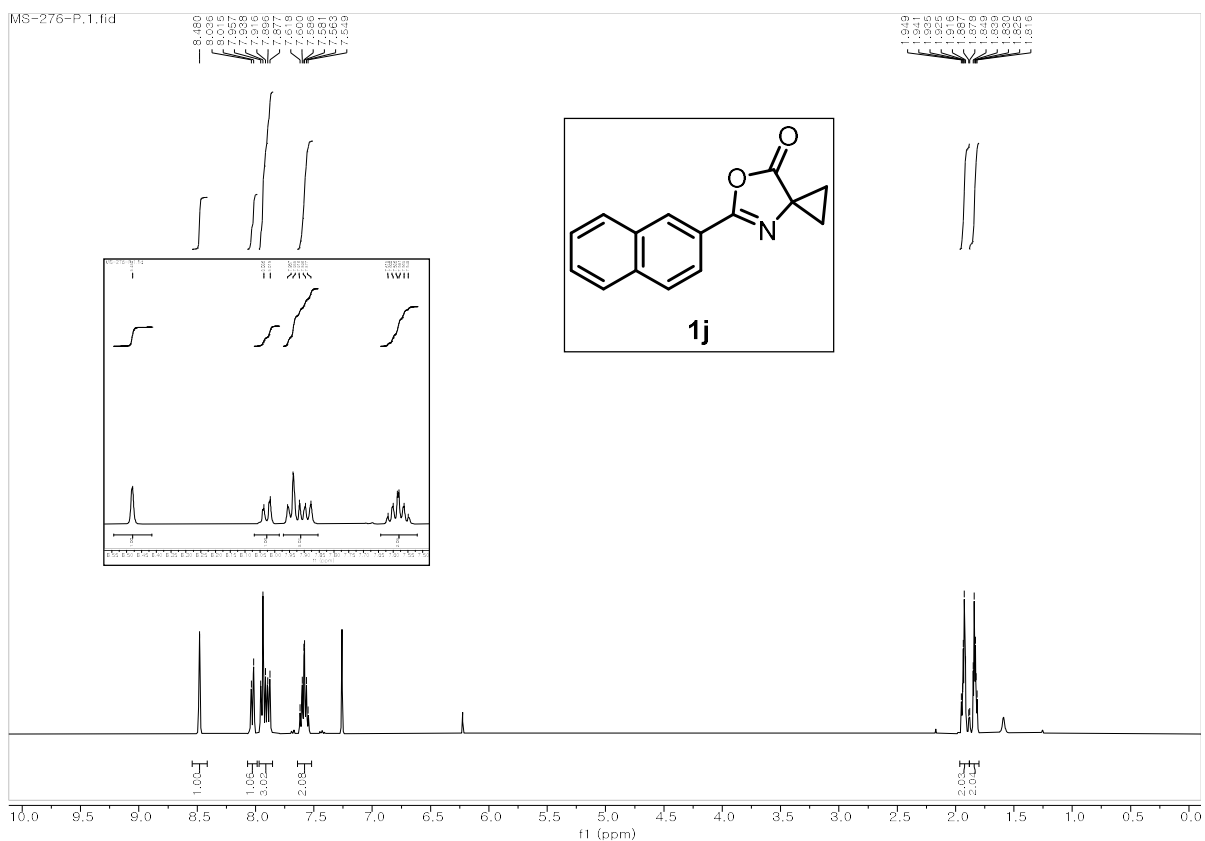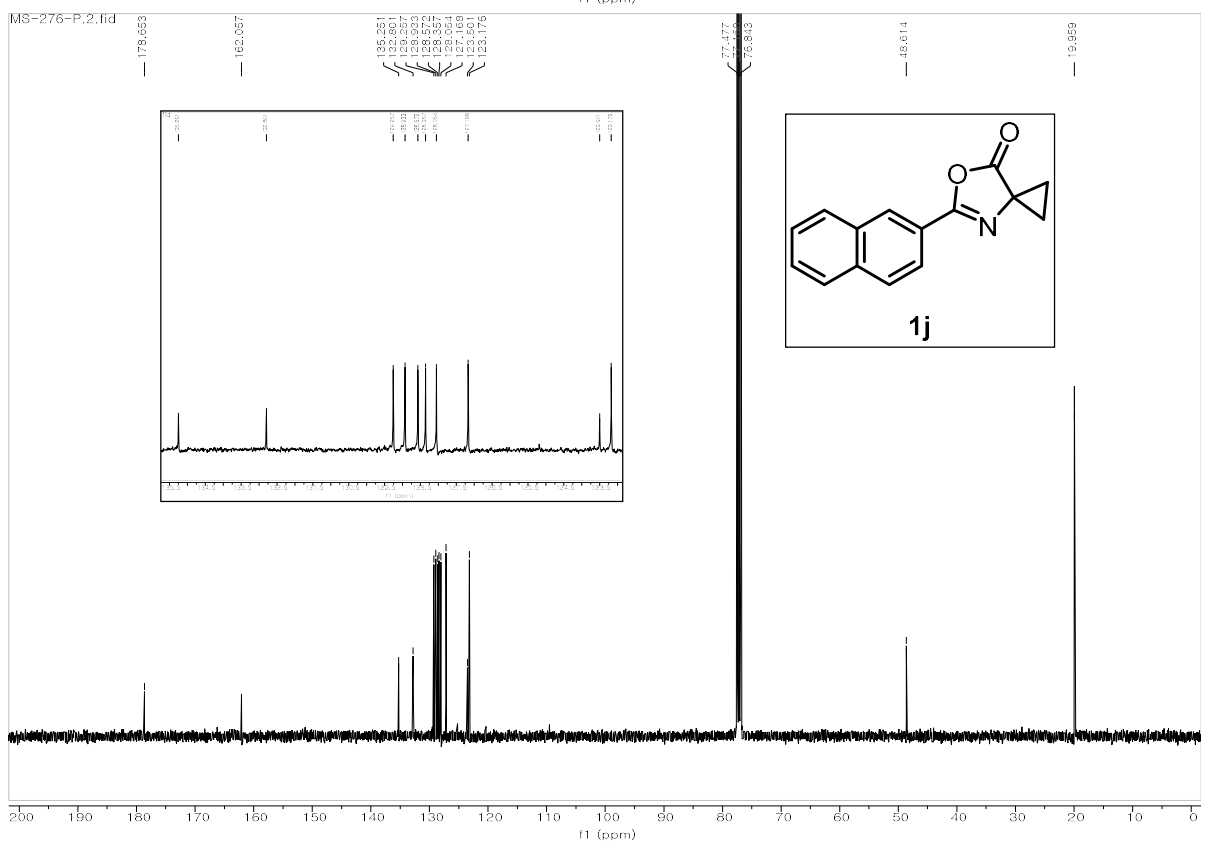



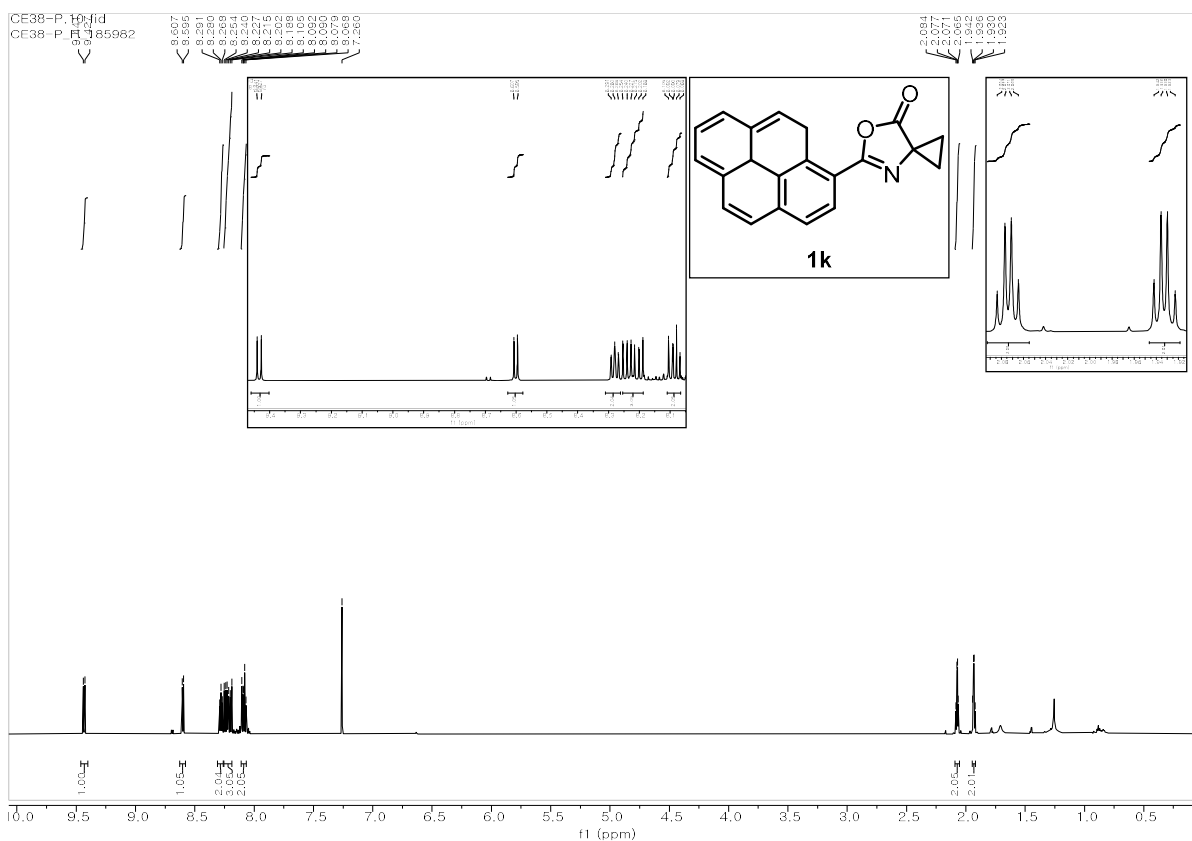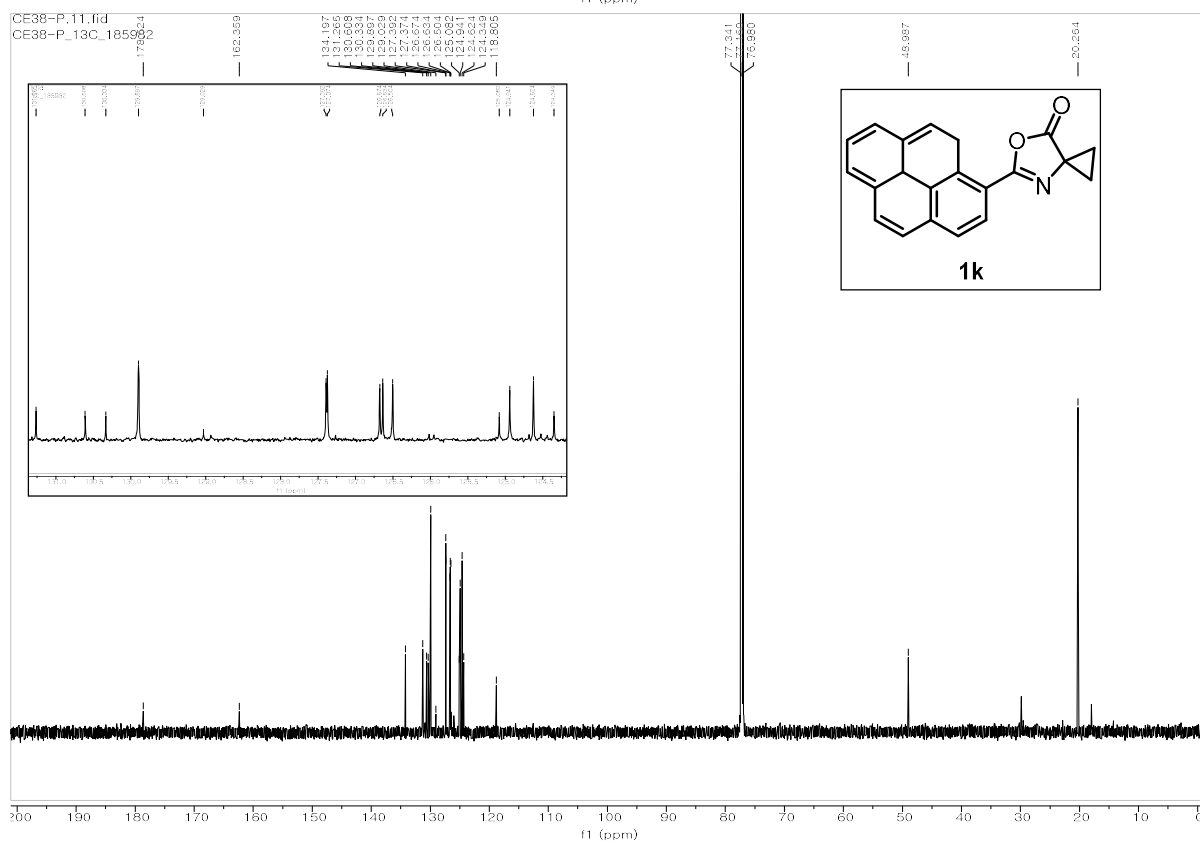

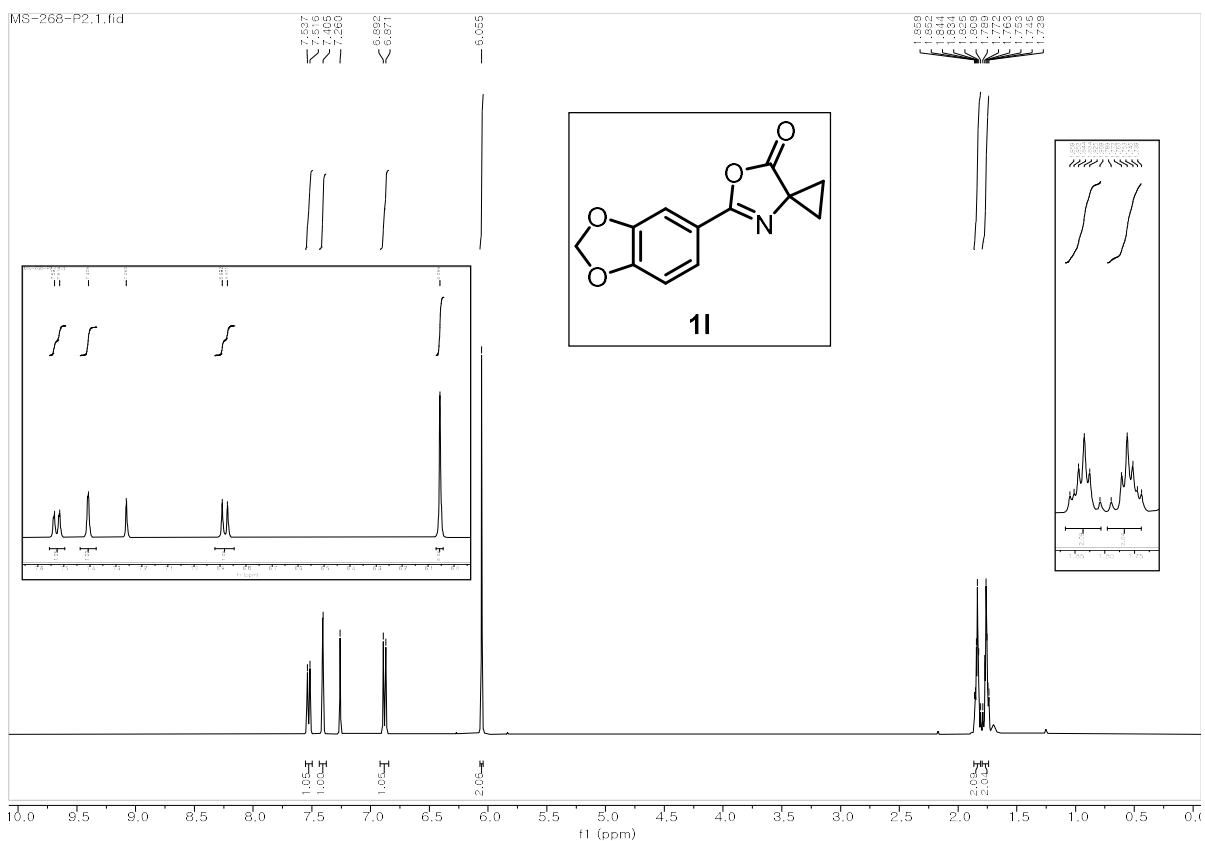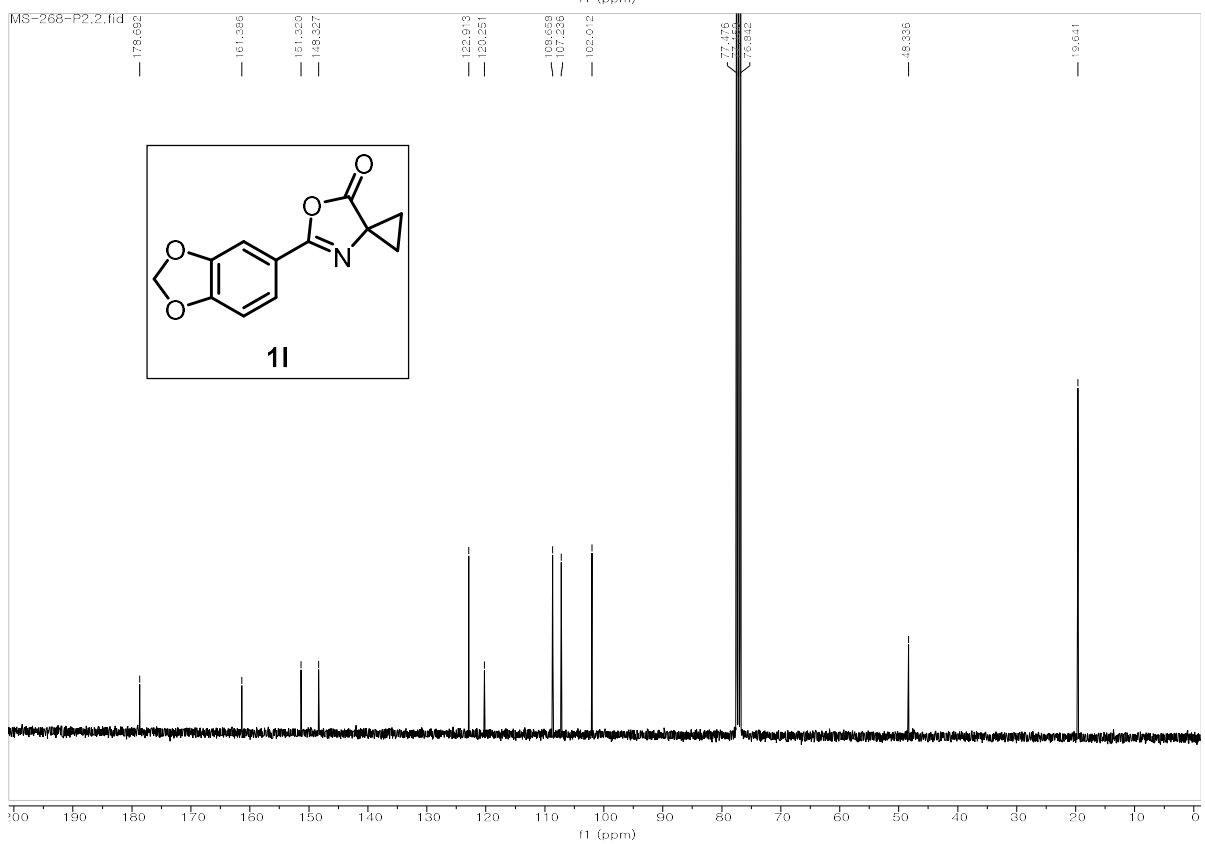

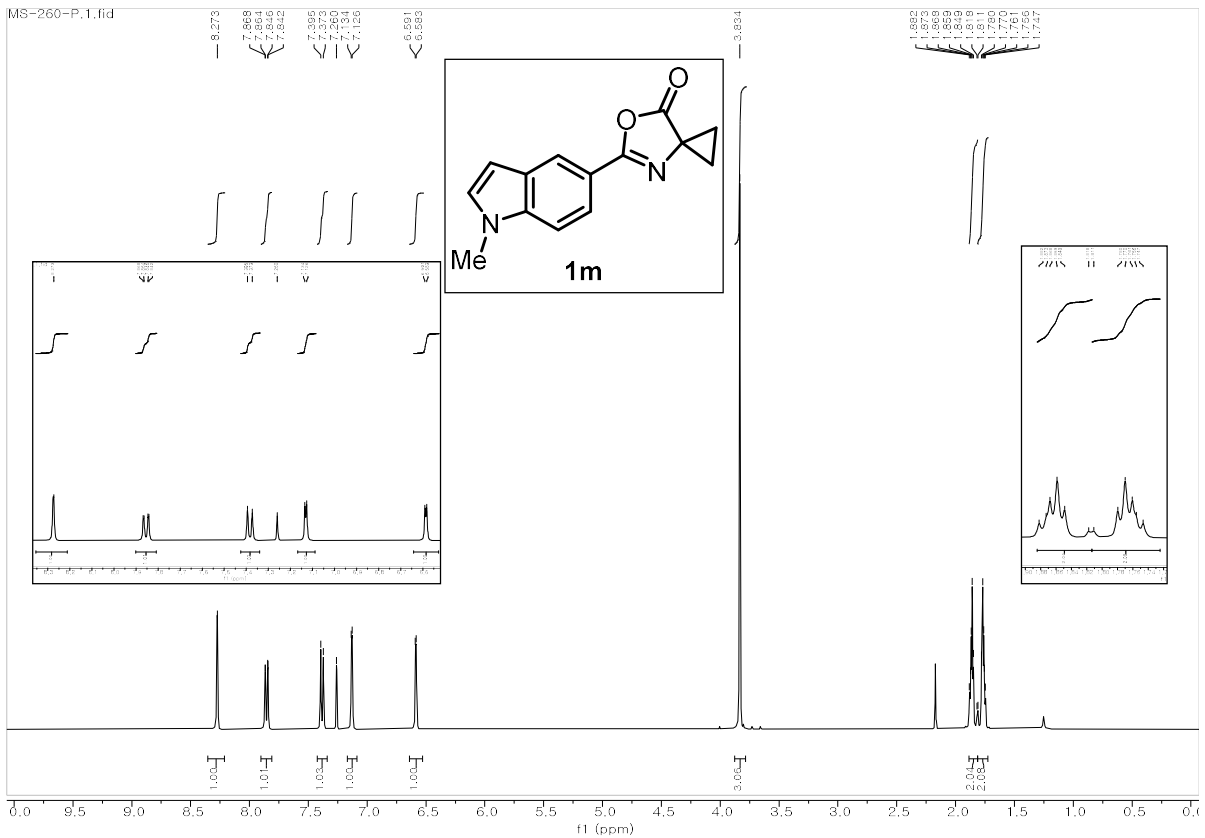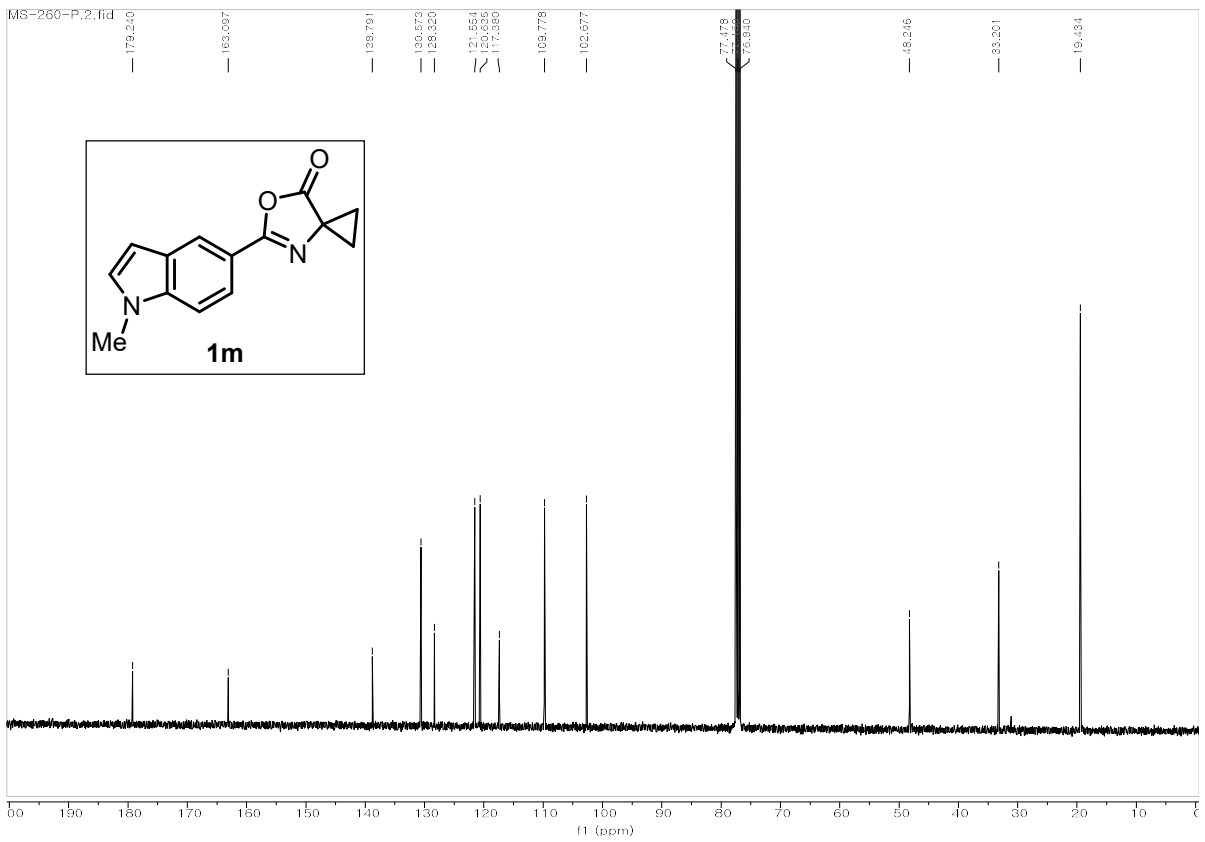

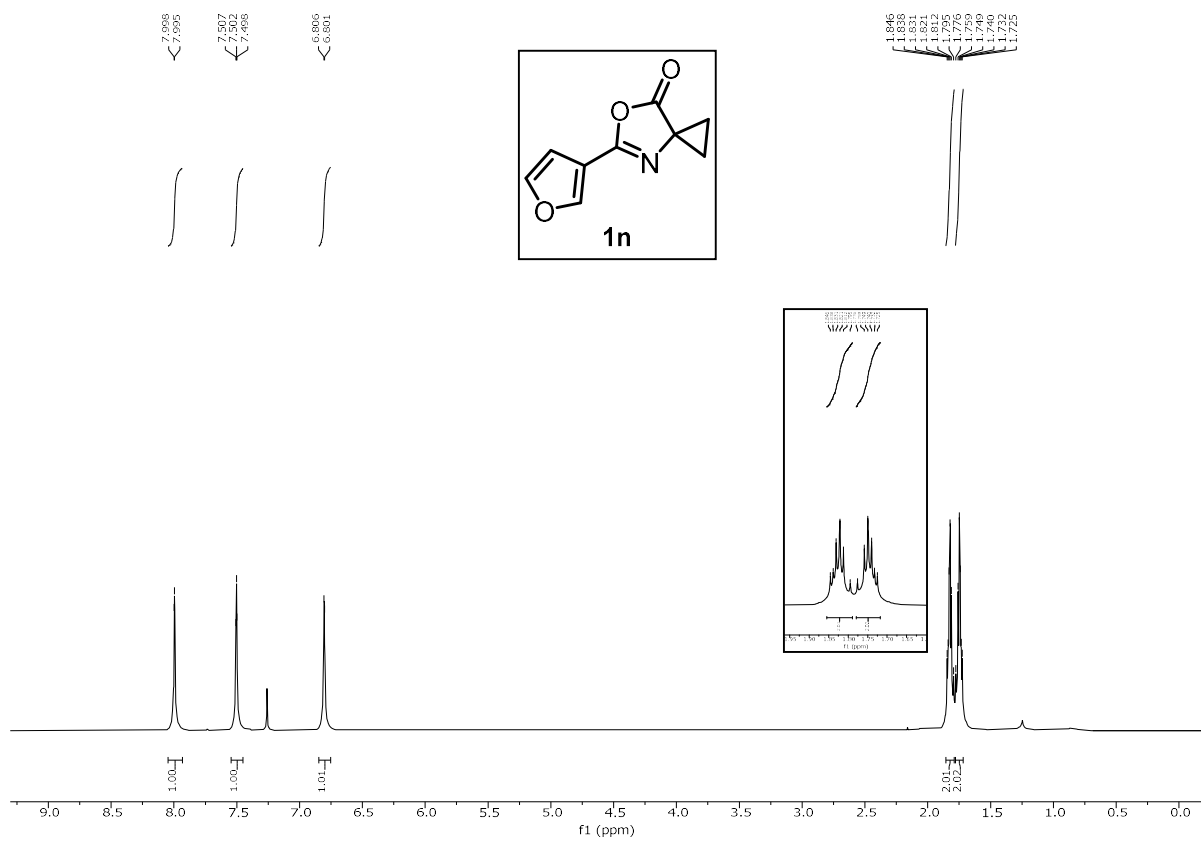

1n. CE27-P\_400MHz.2.fid

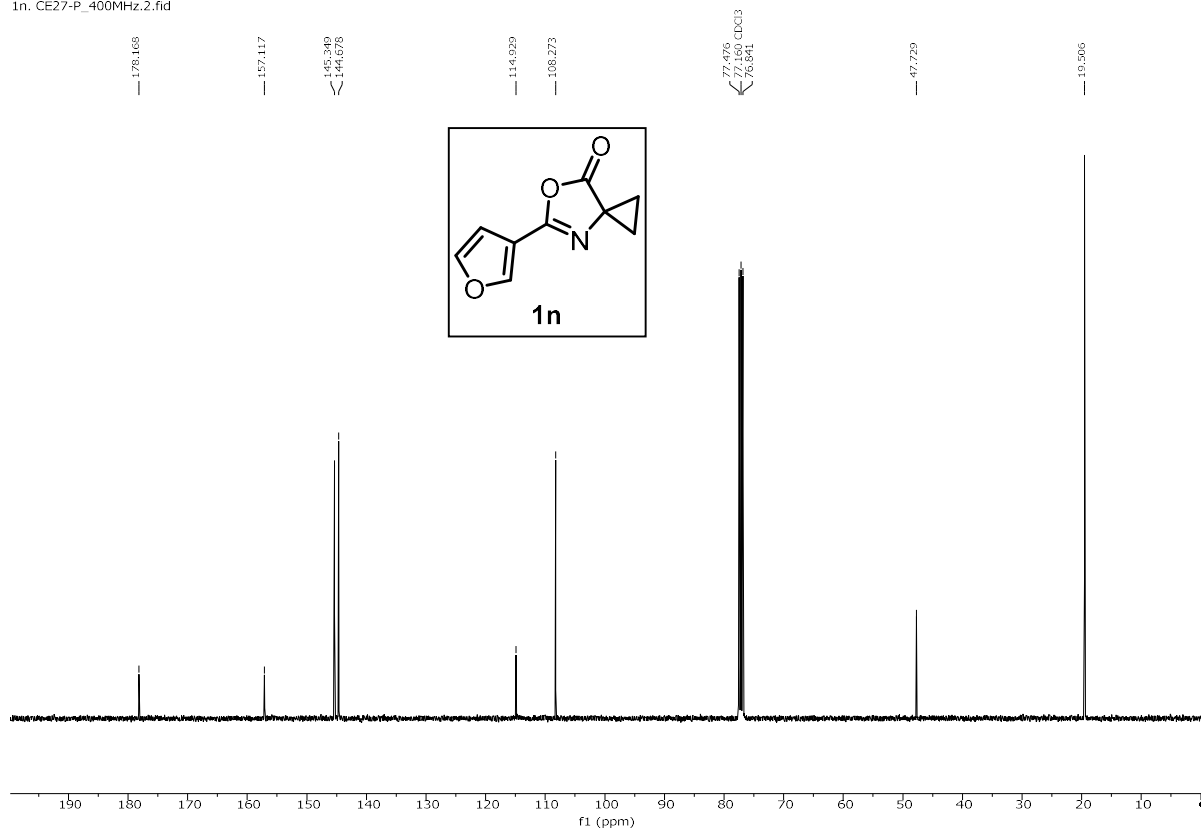

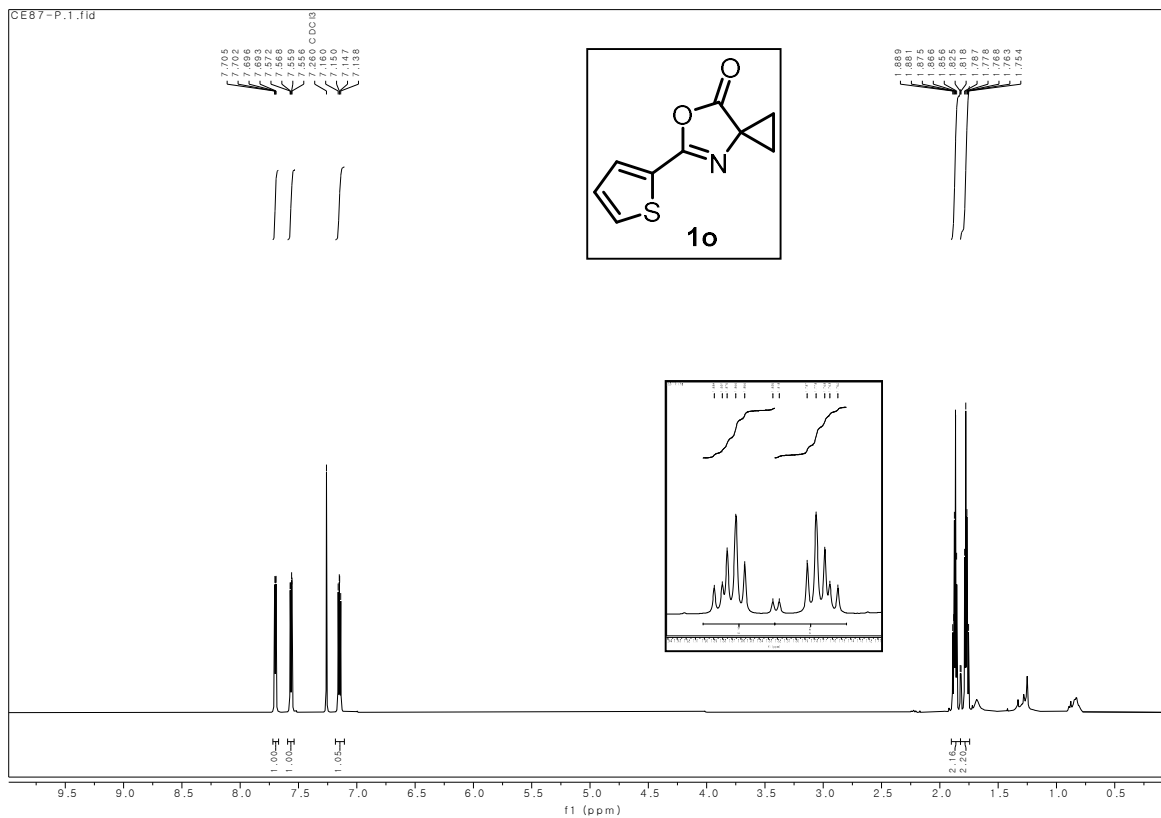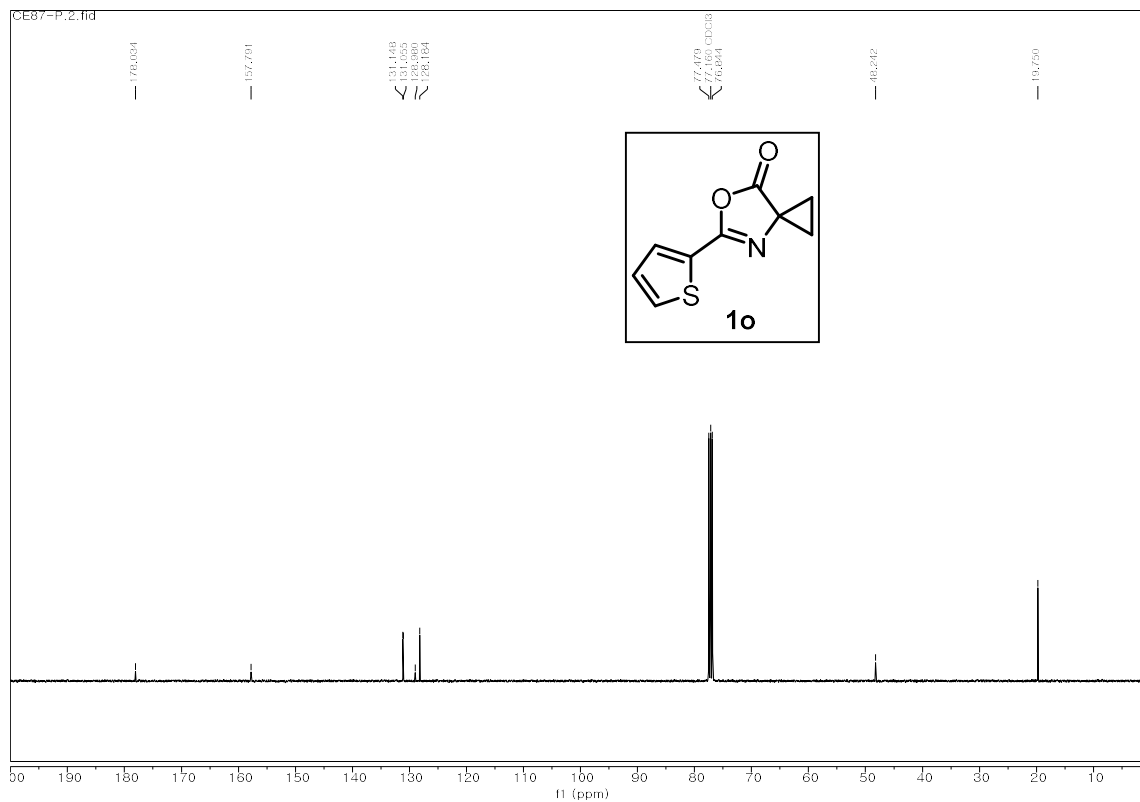

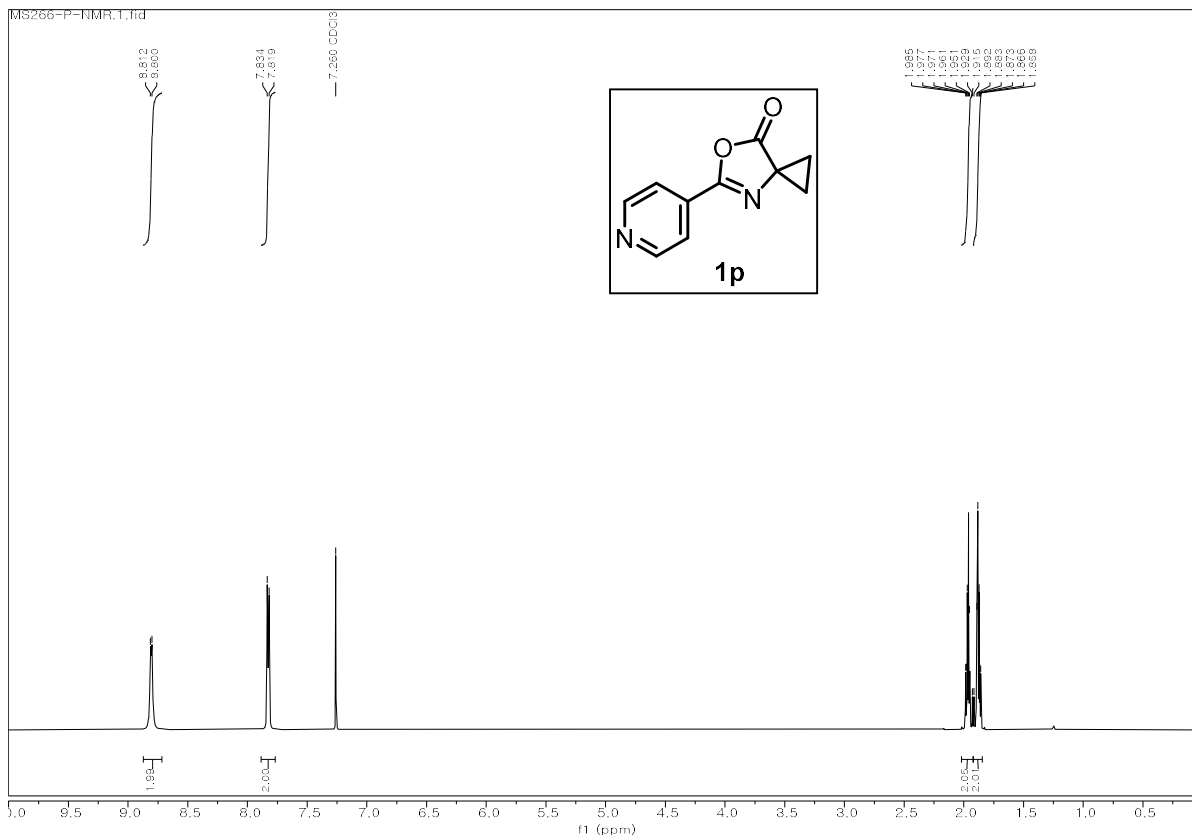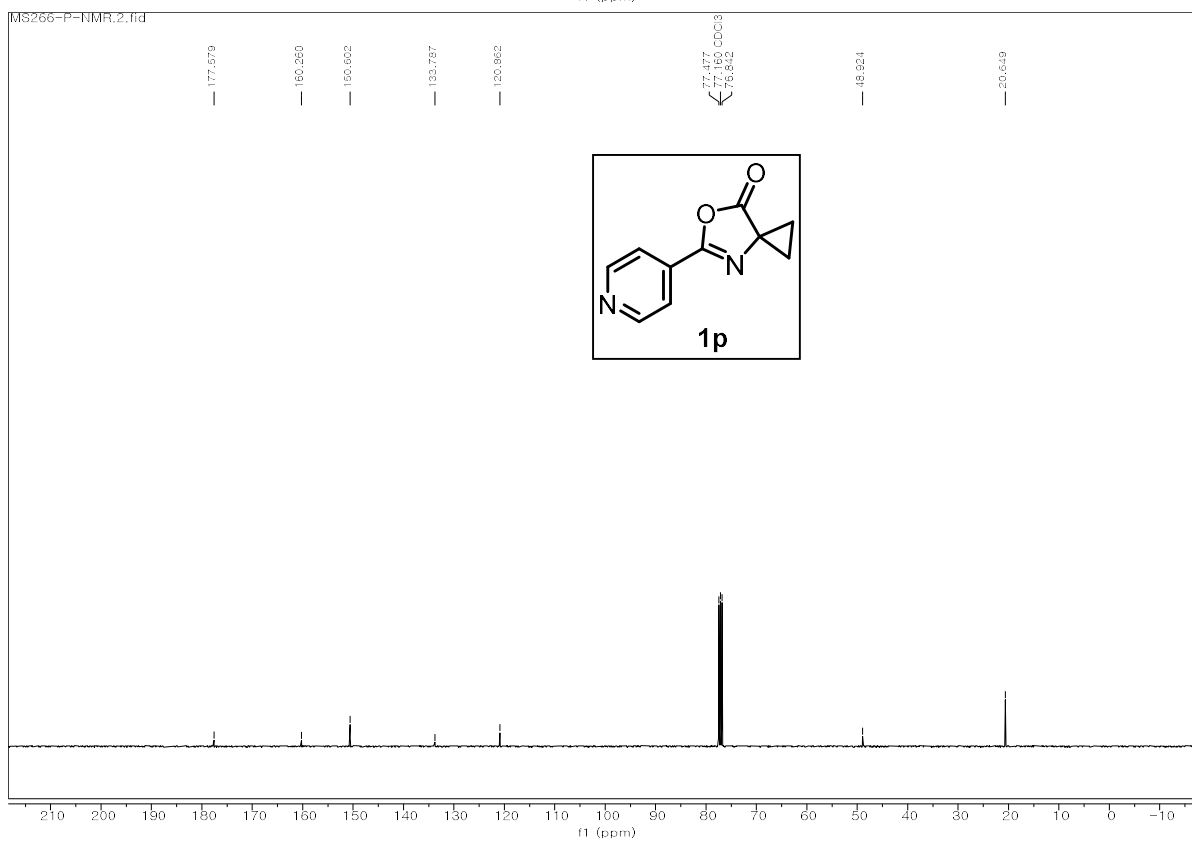

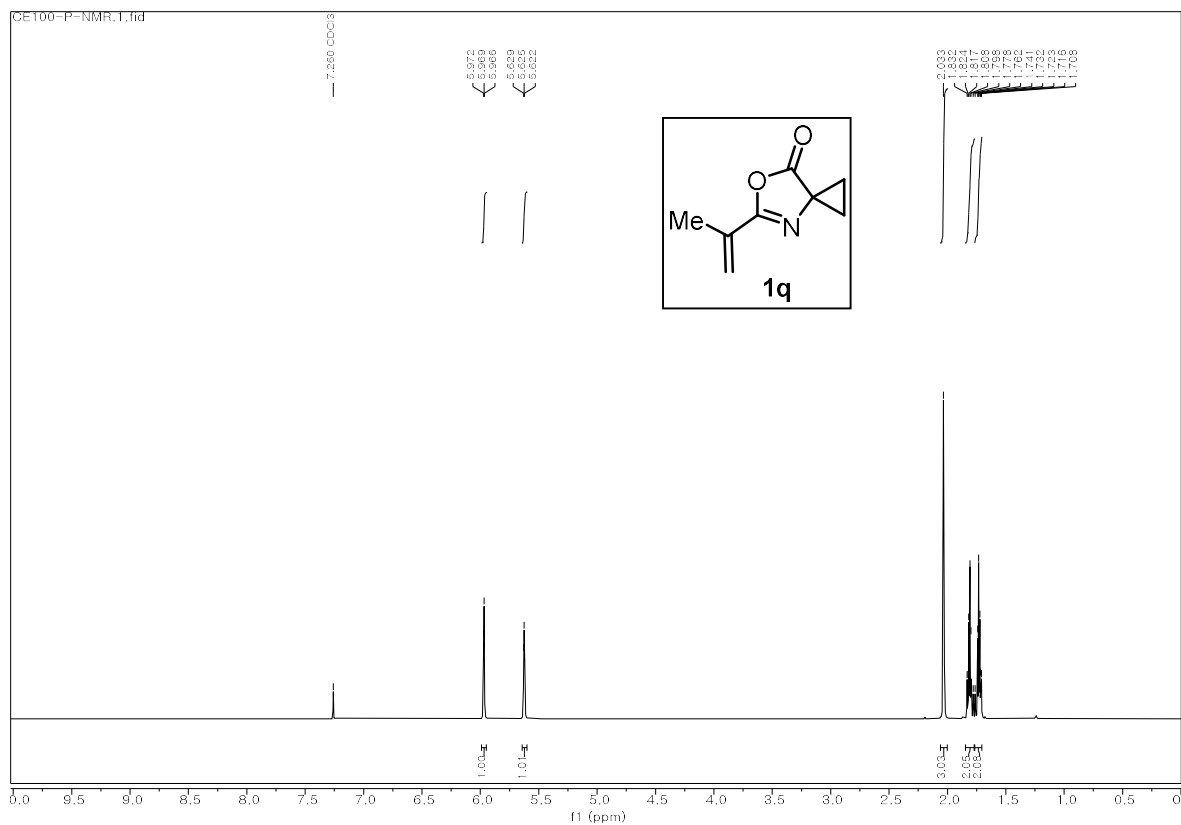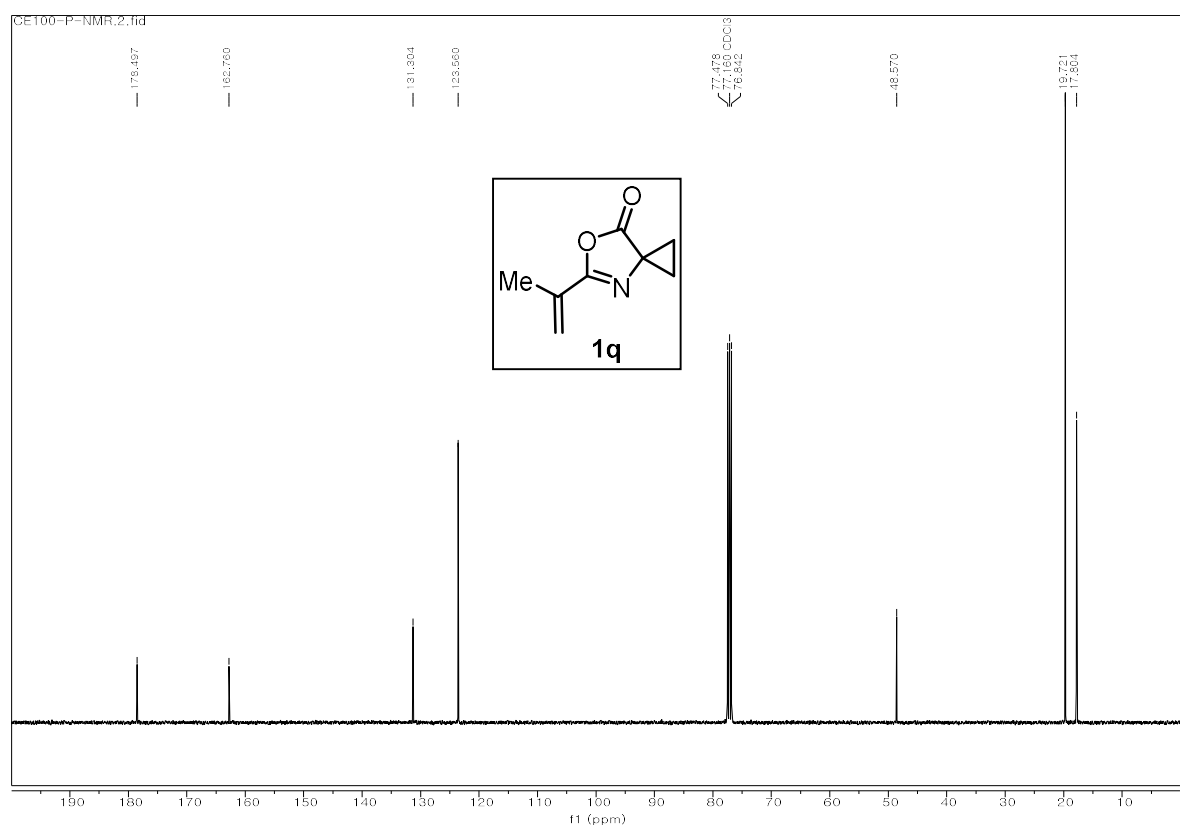

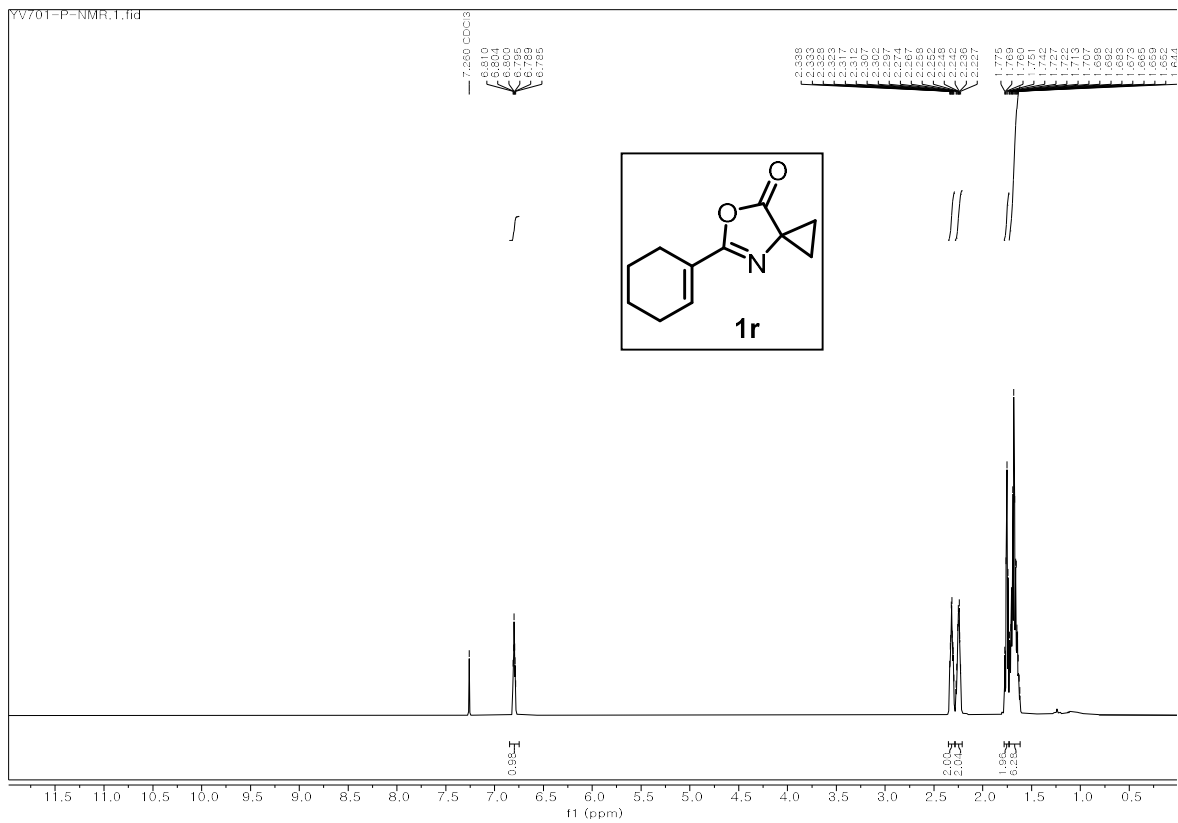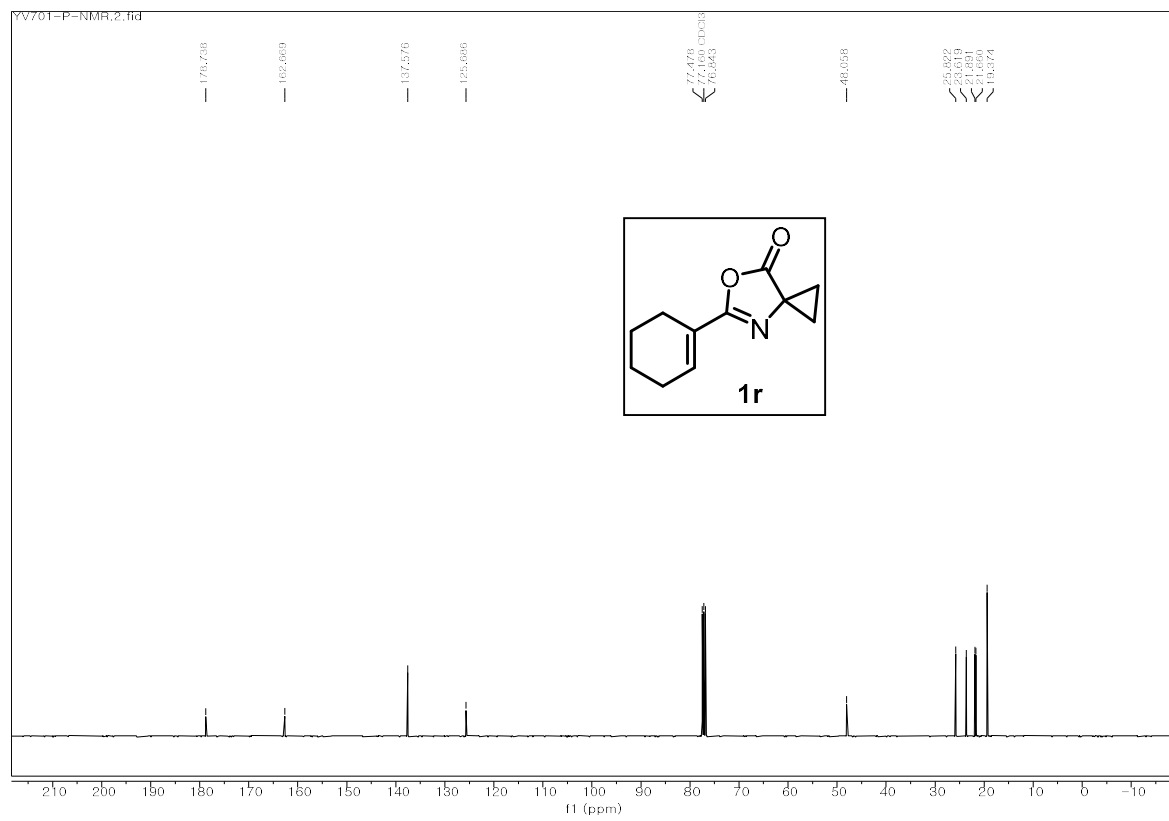



MS-247-P.1.fid

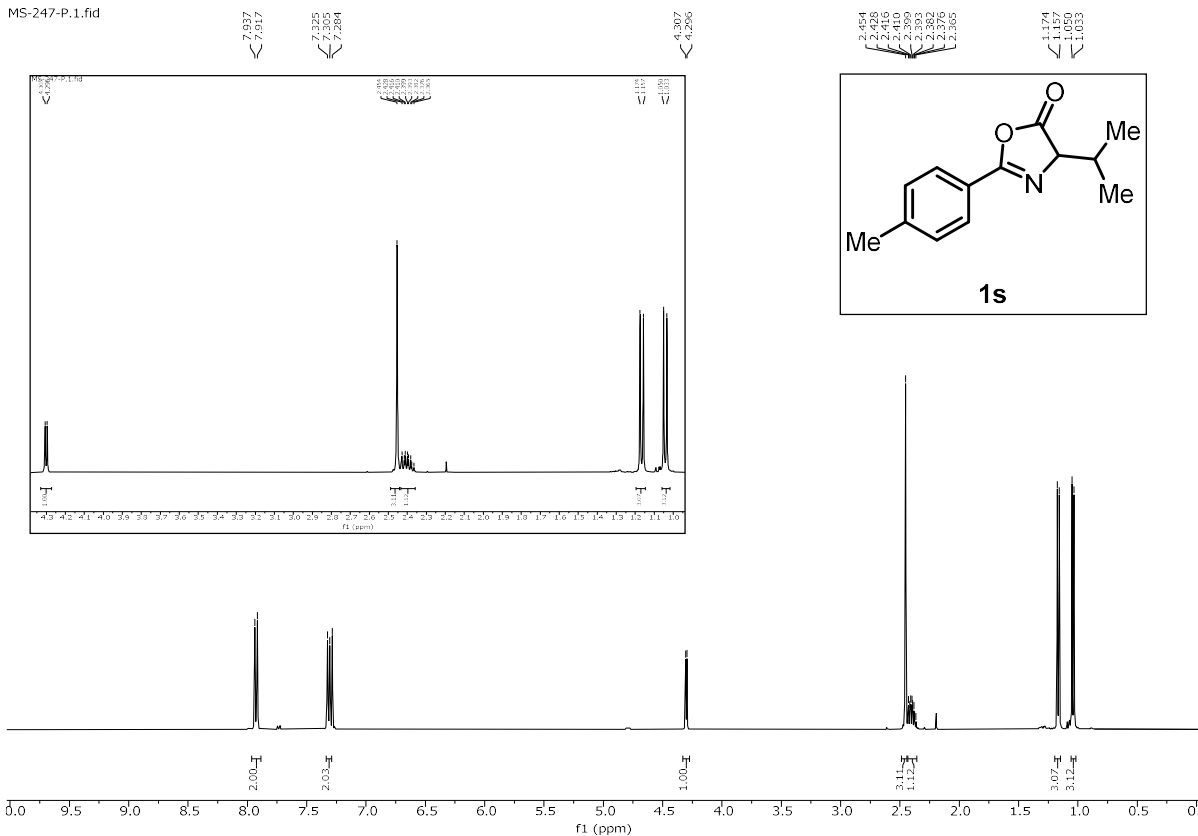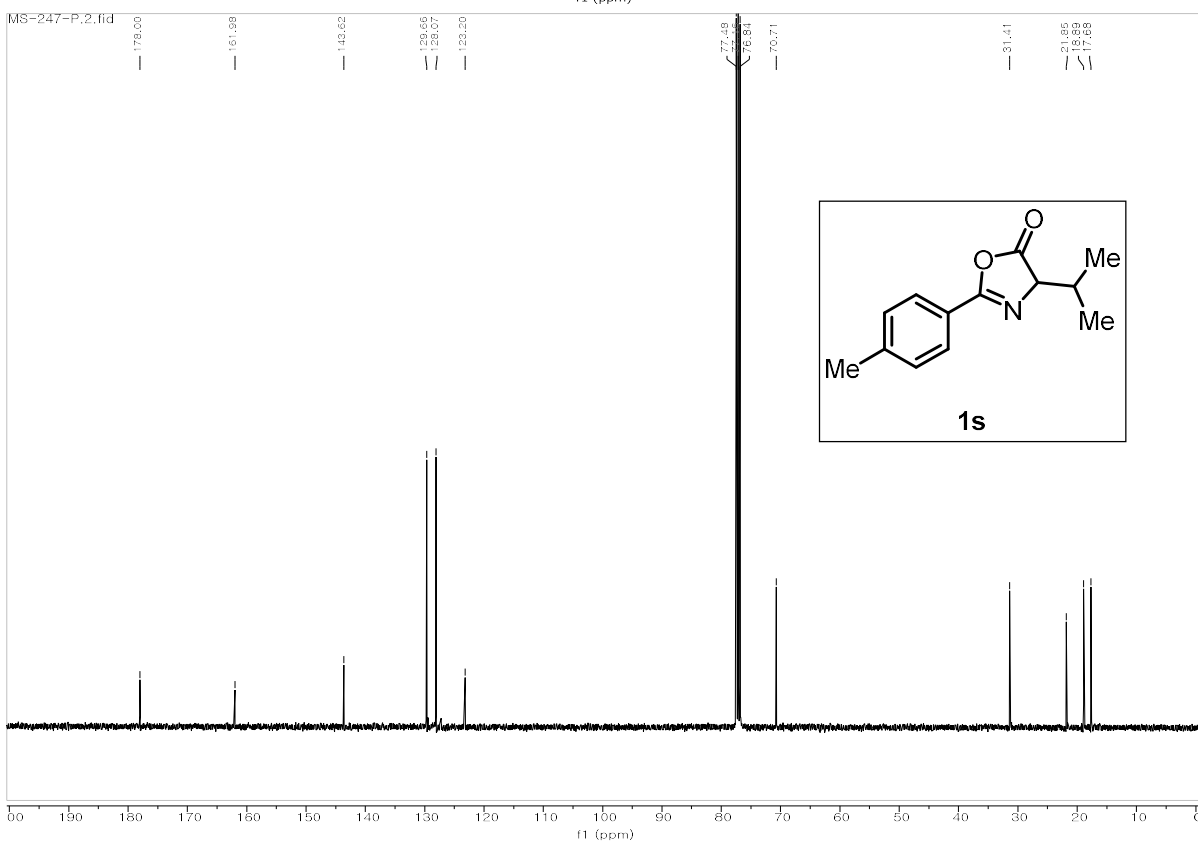

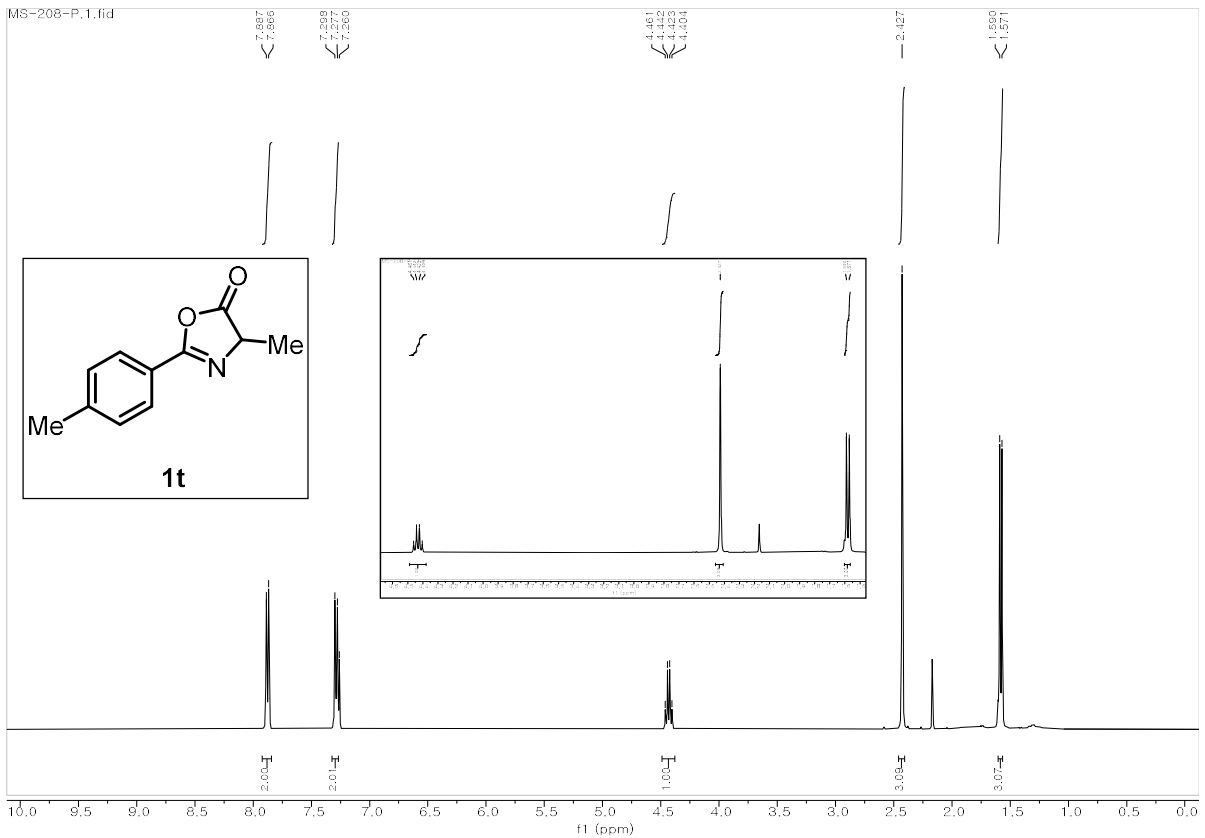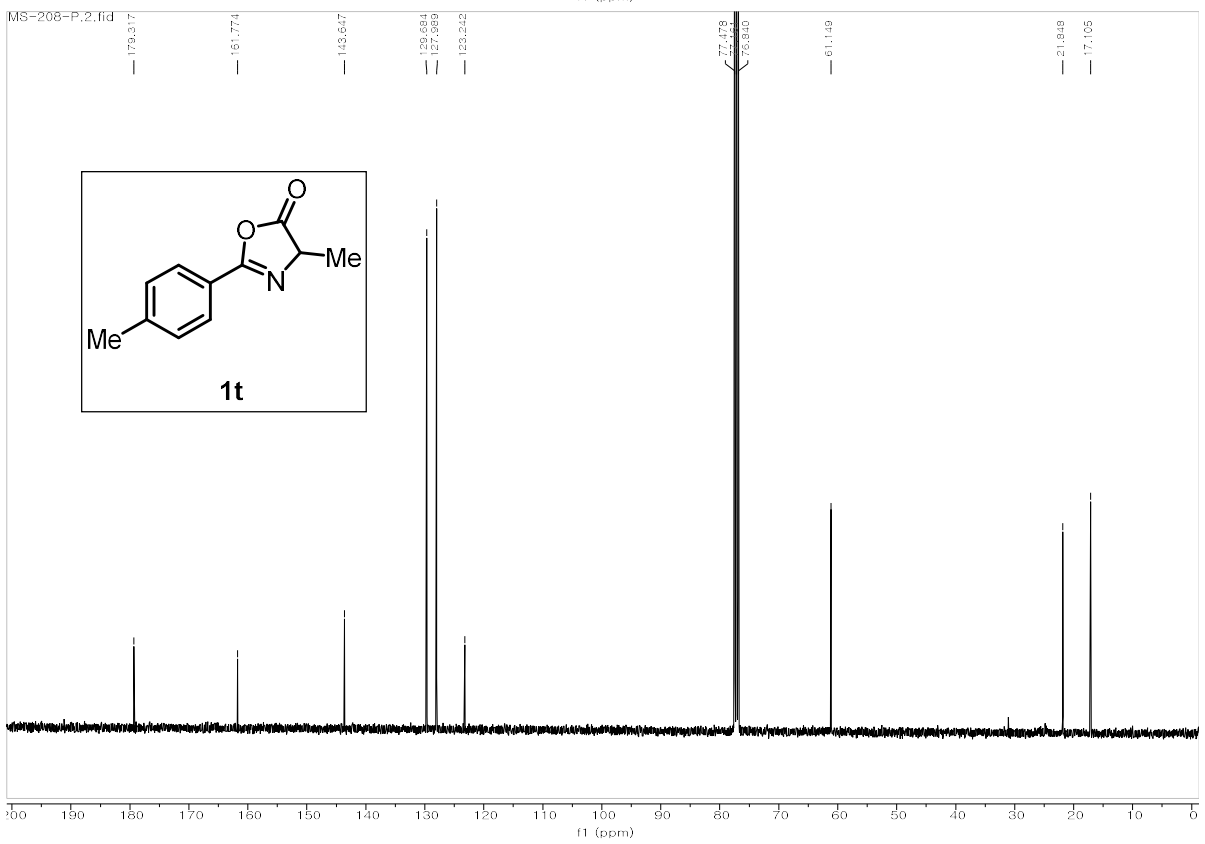

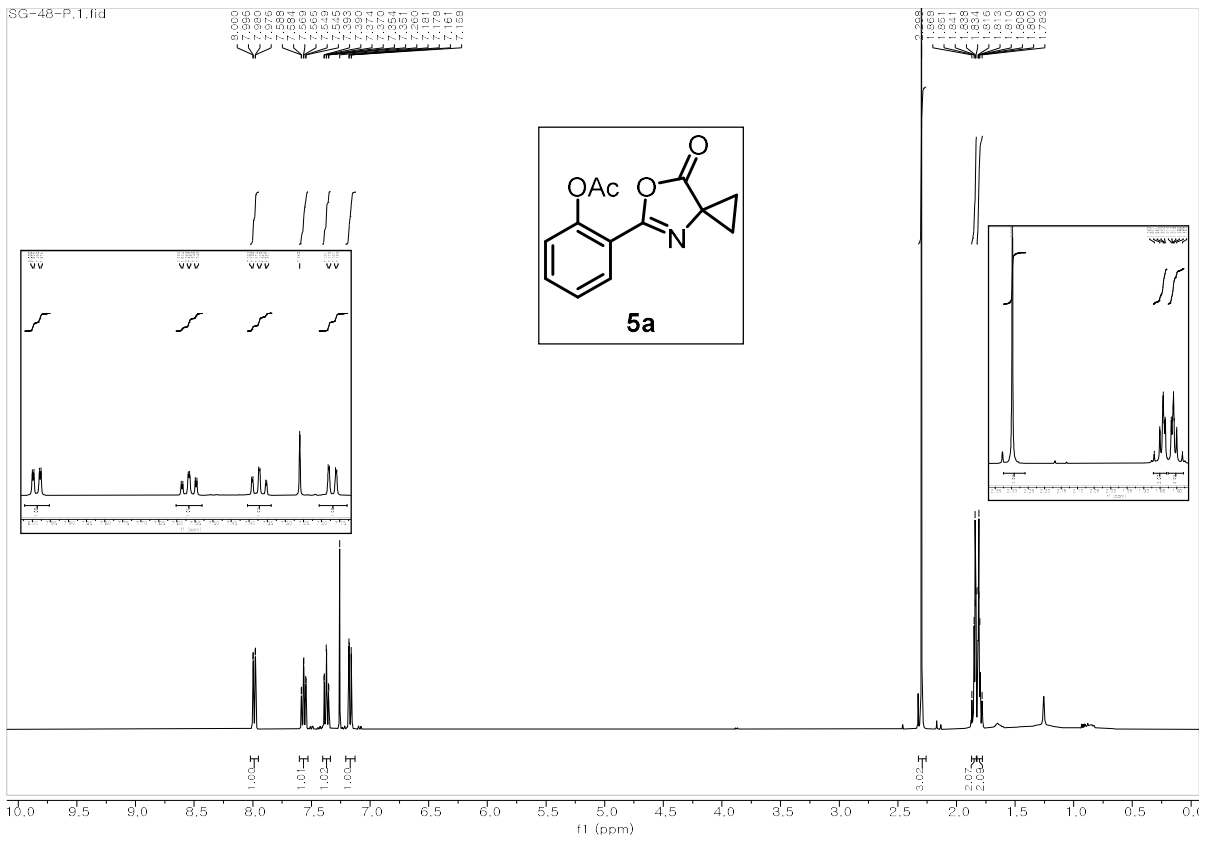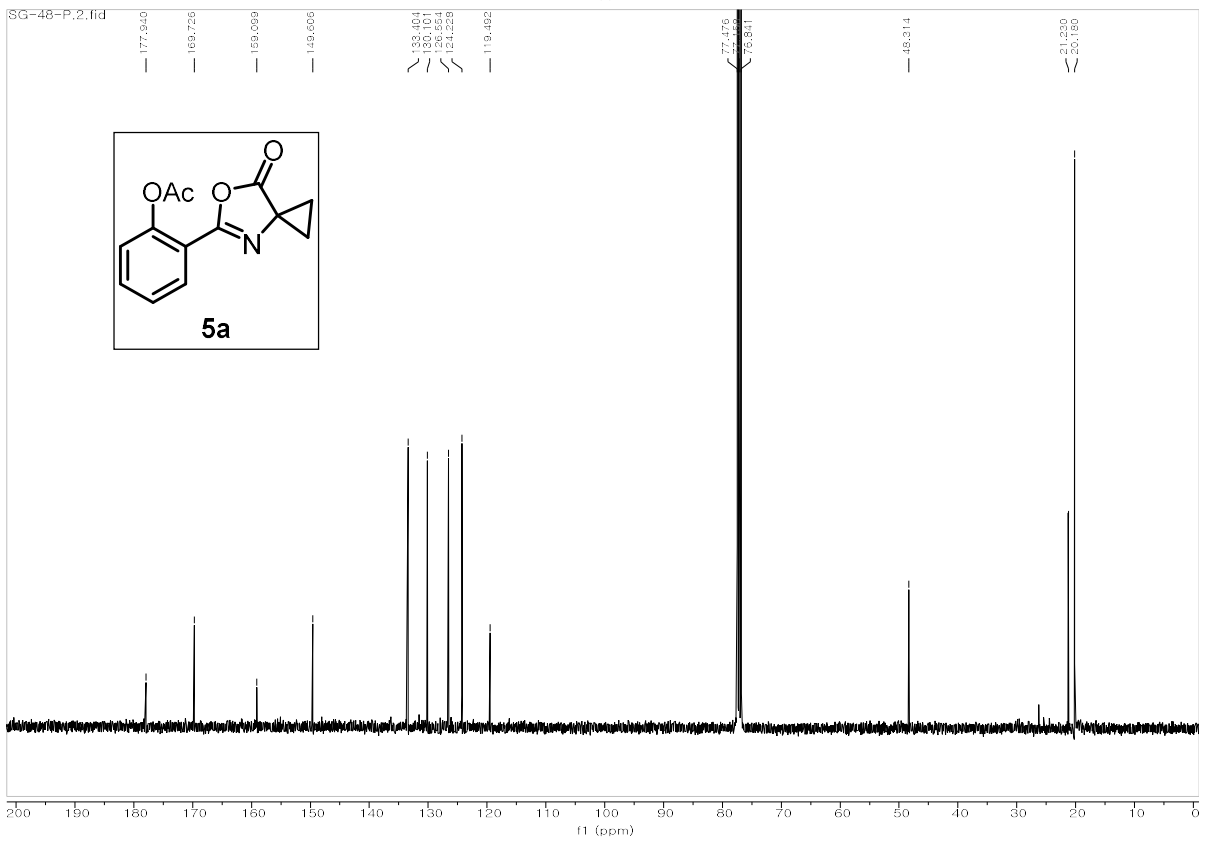

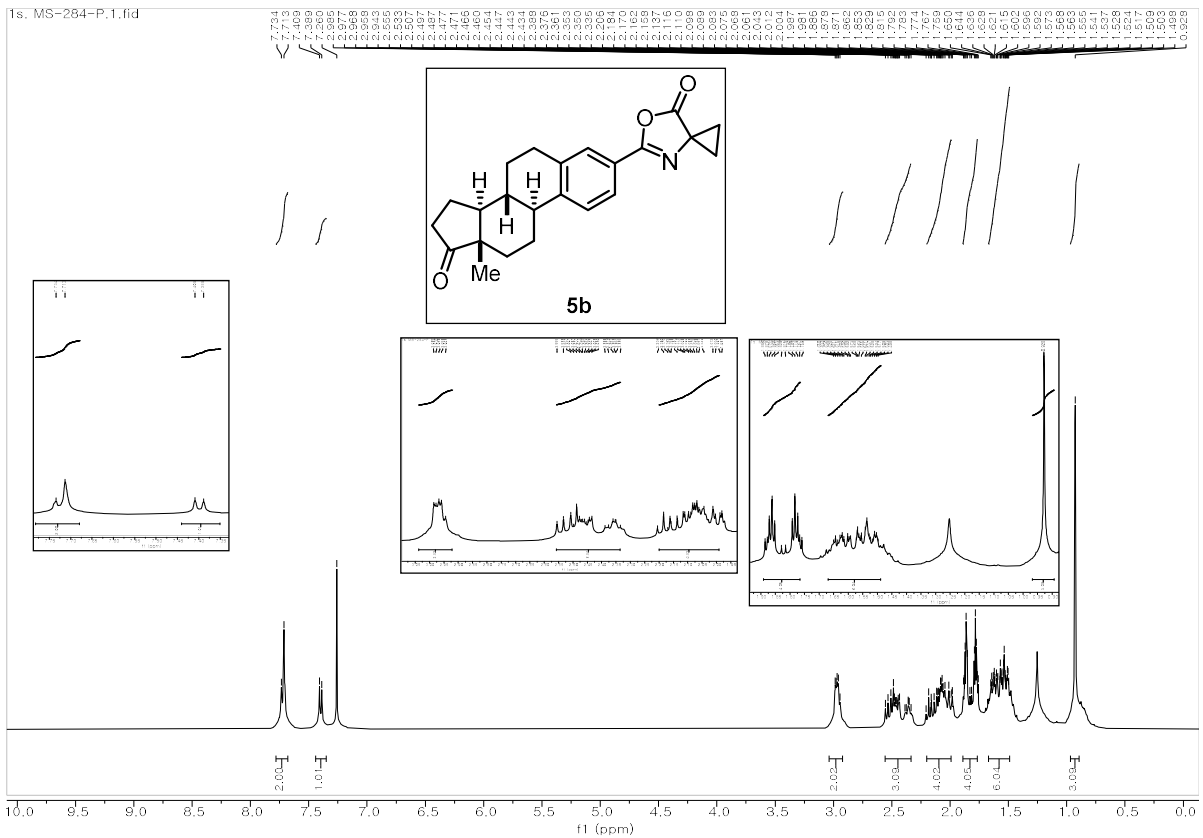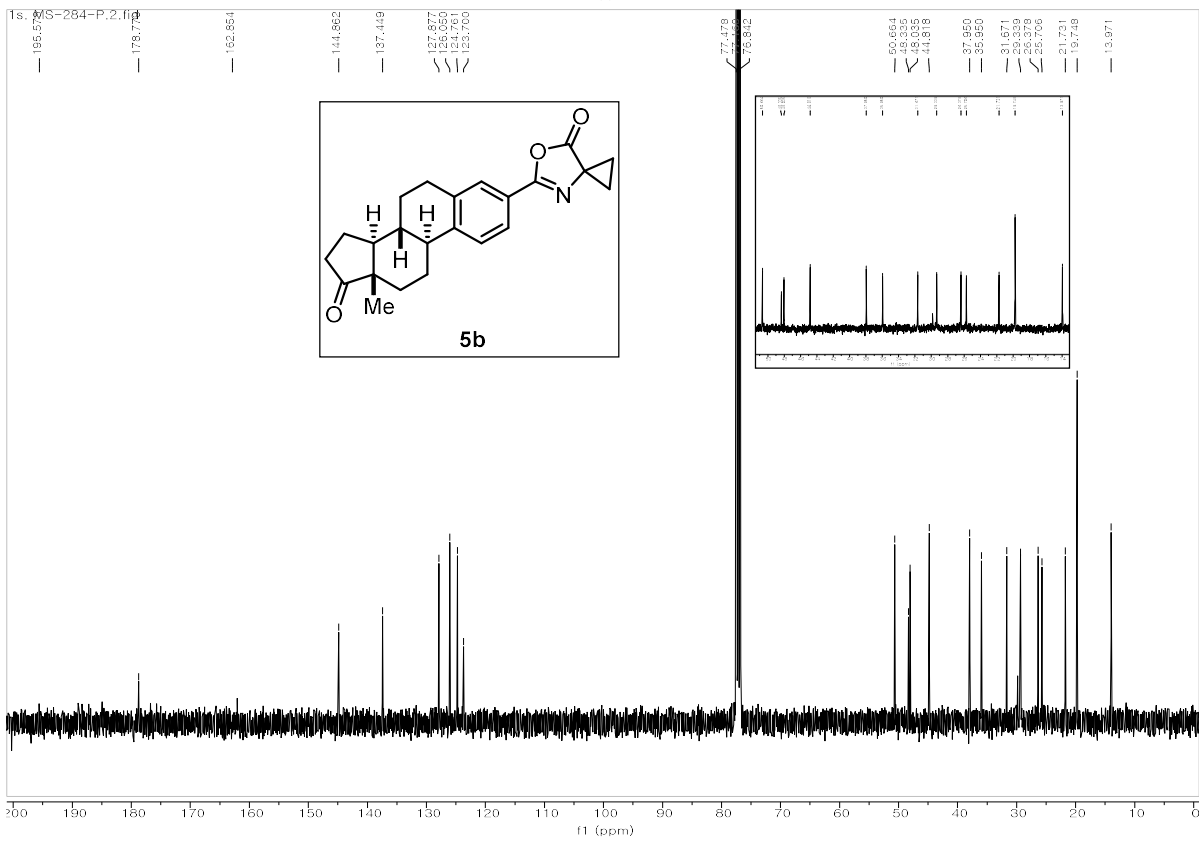

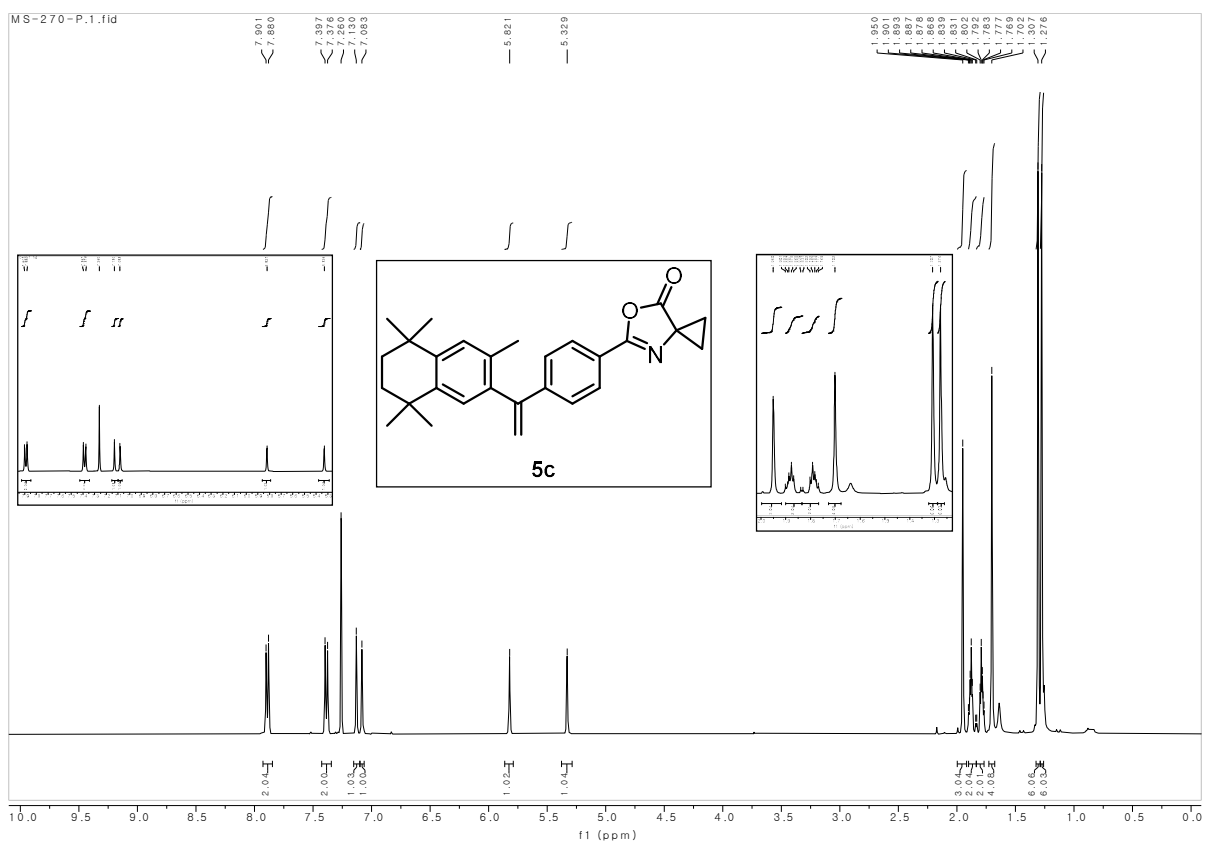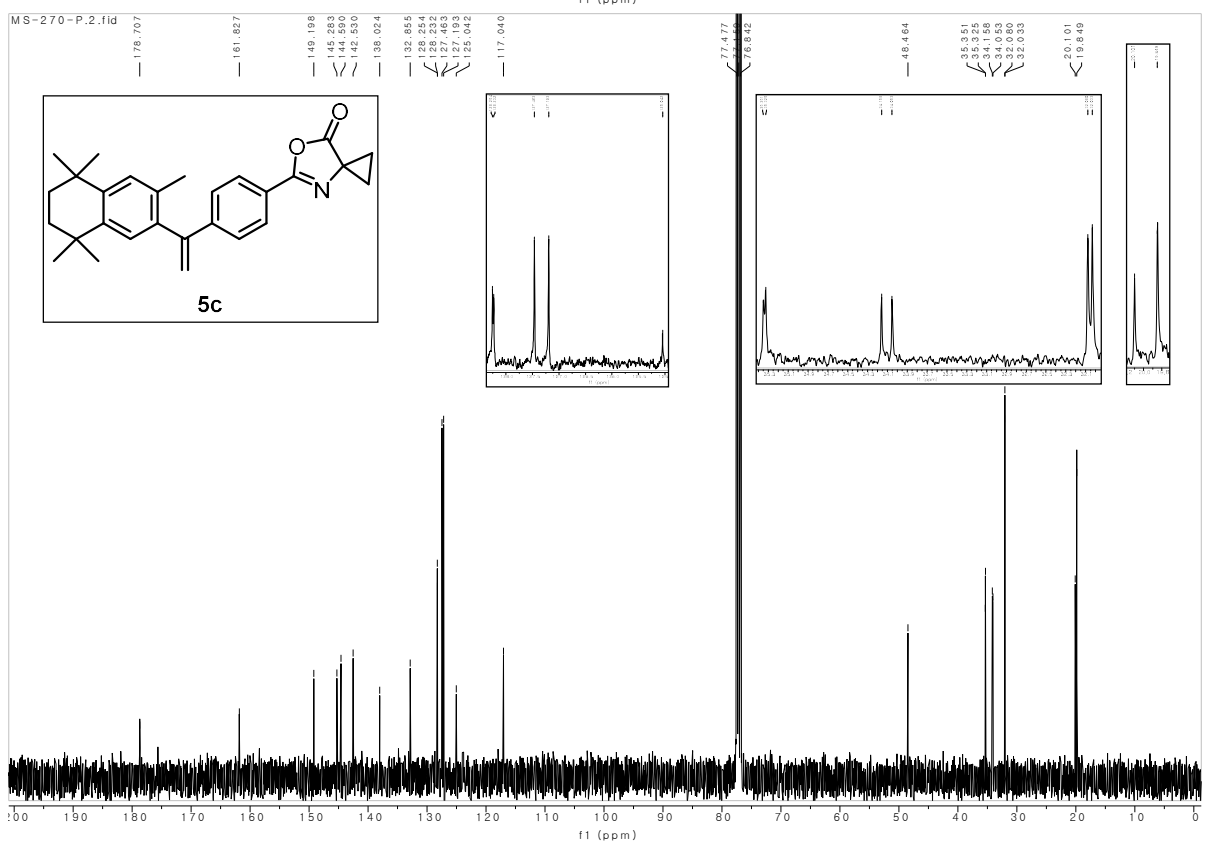

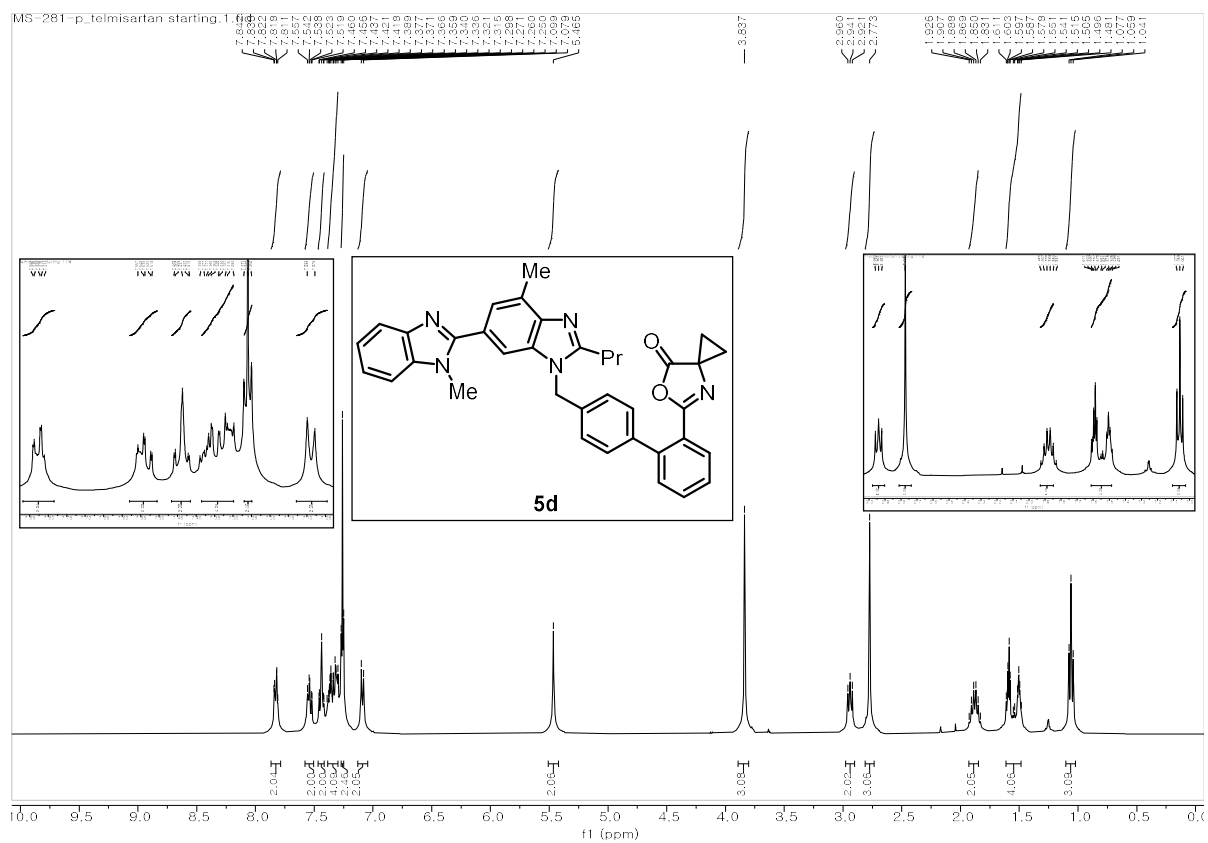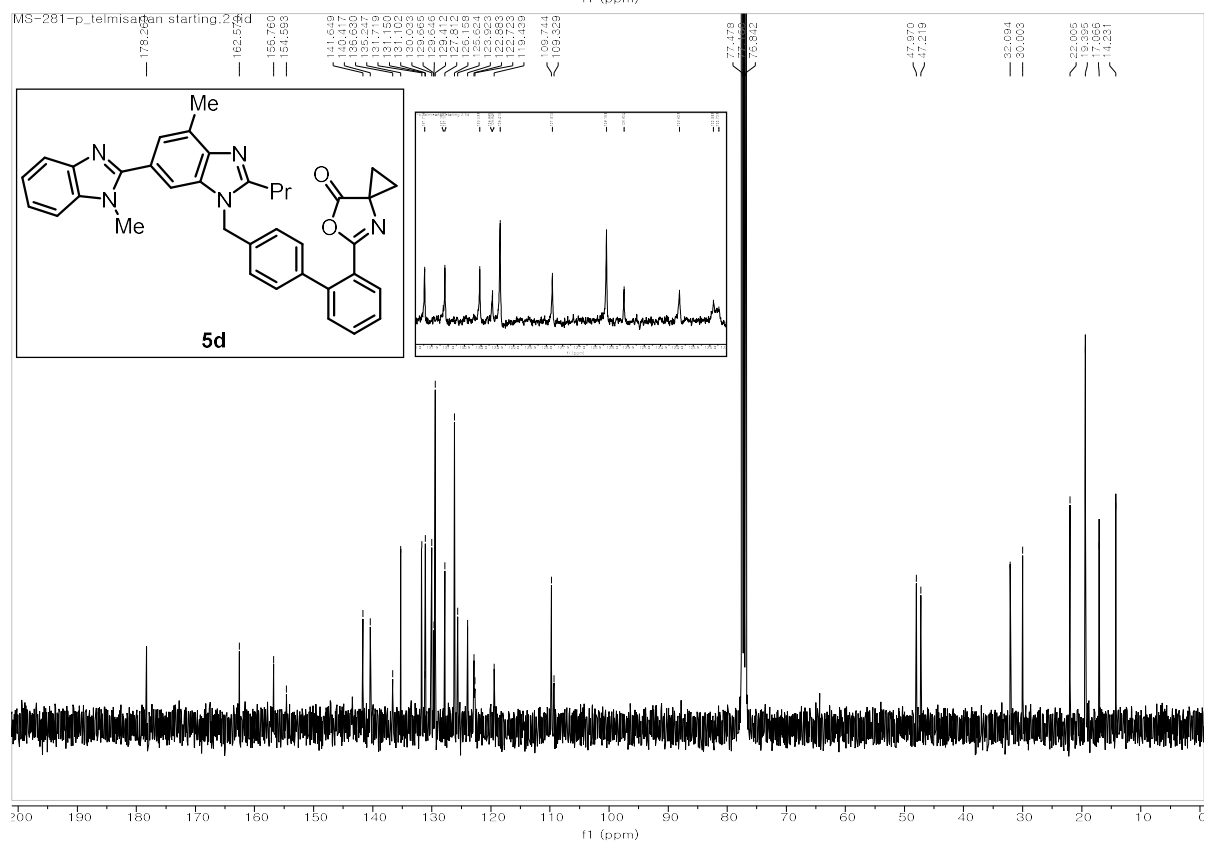

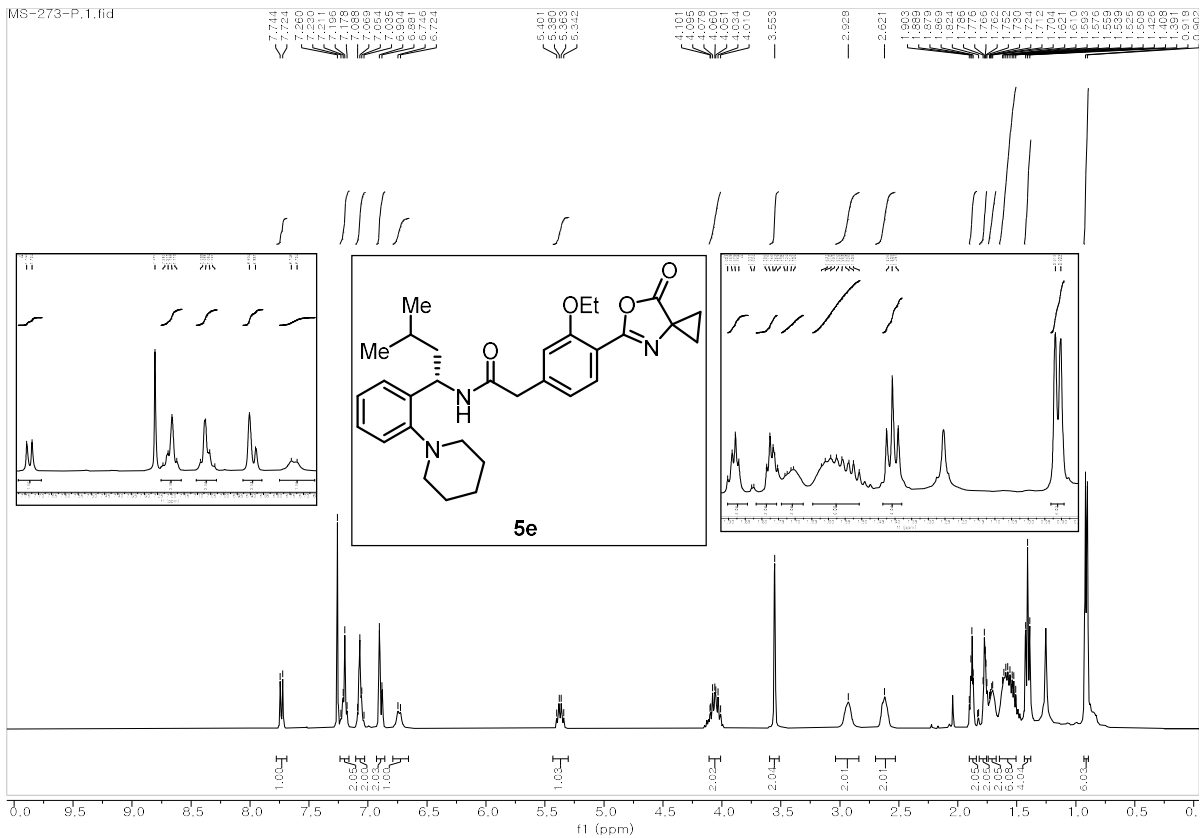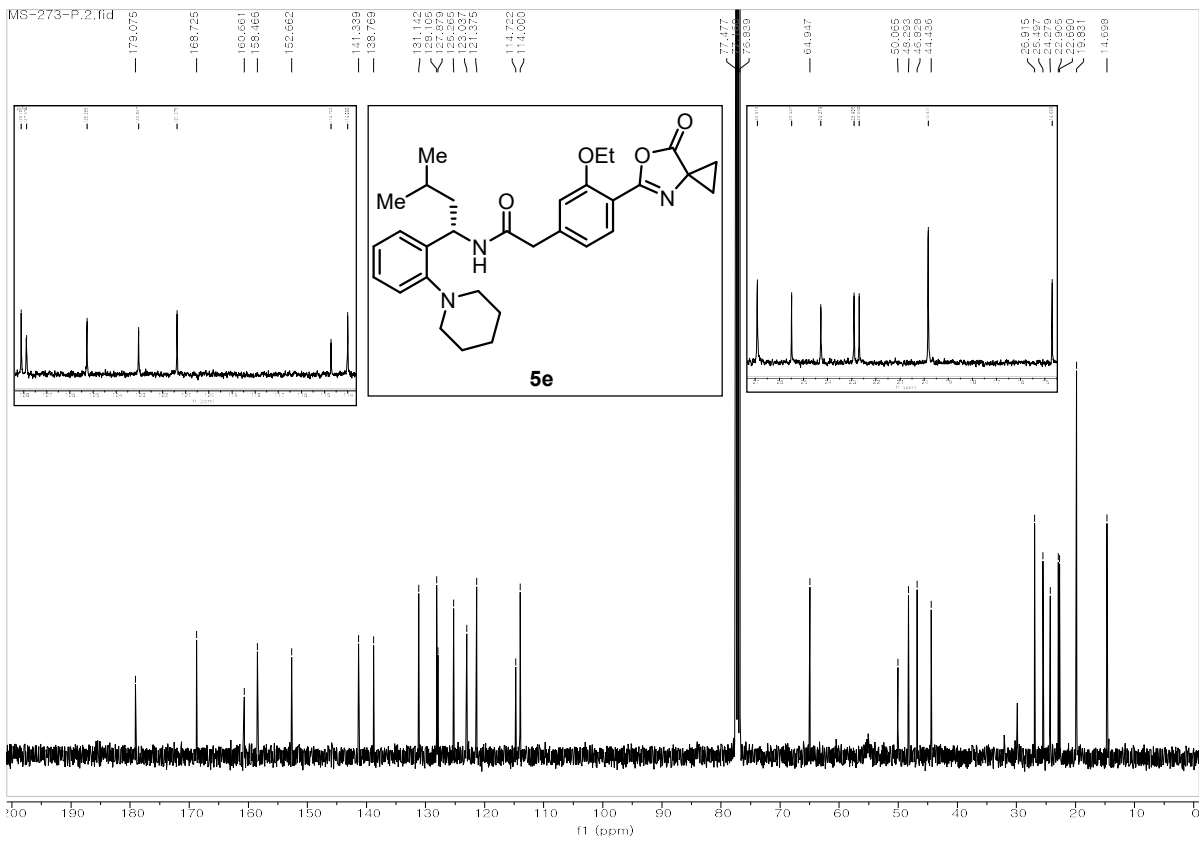

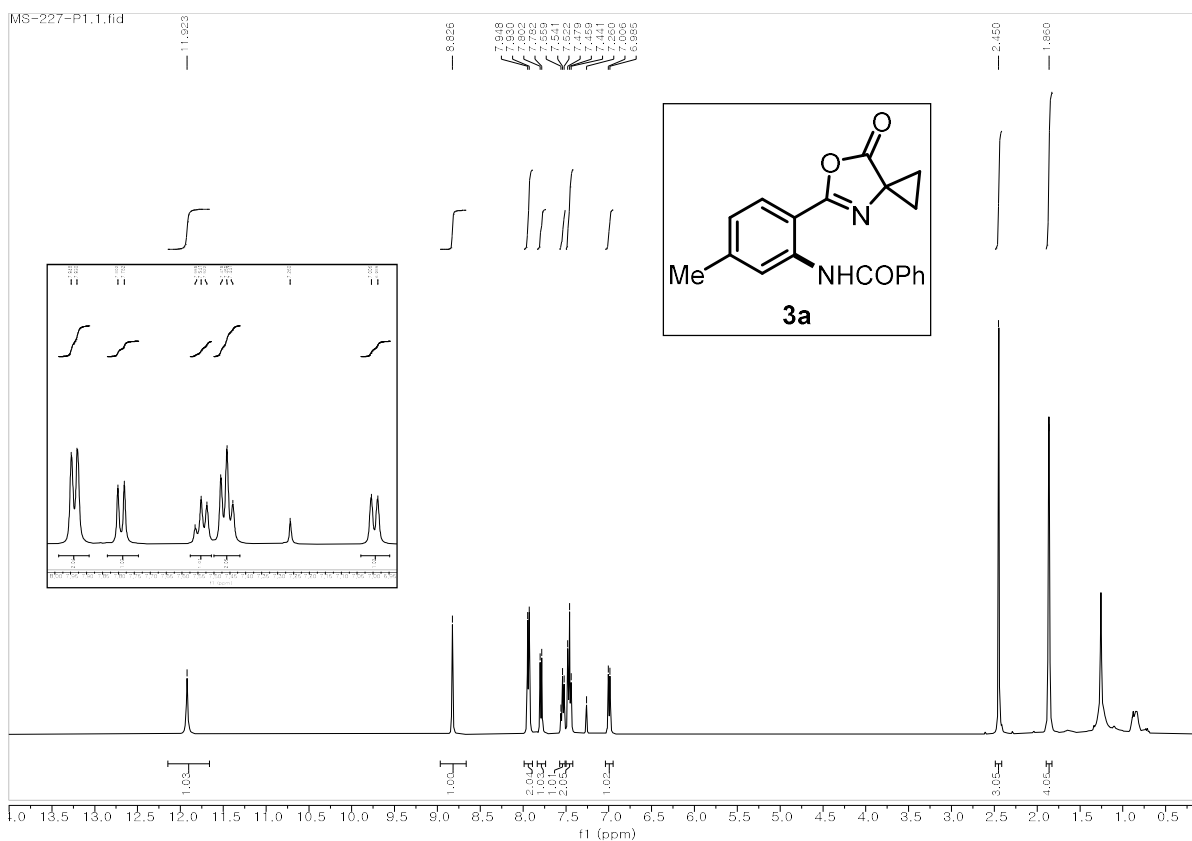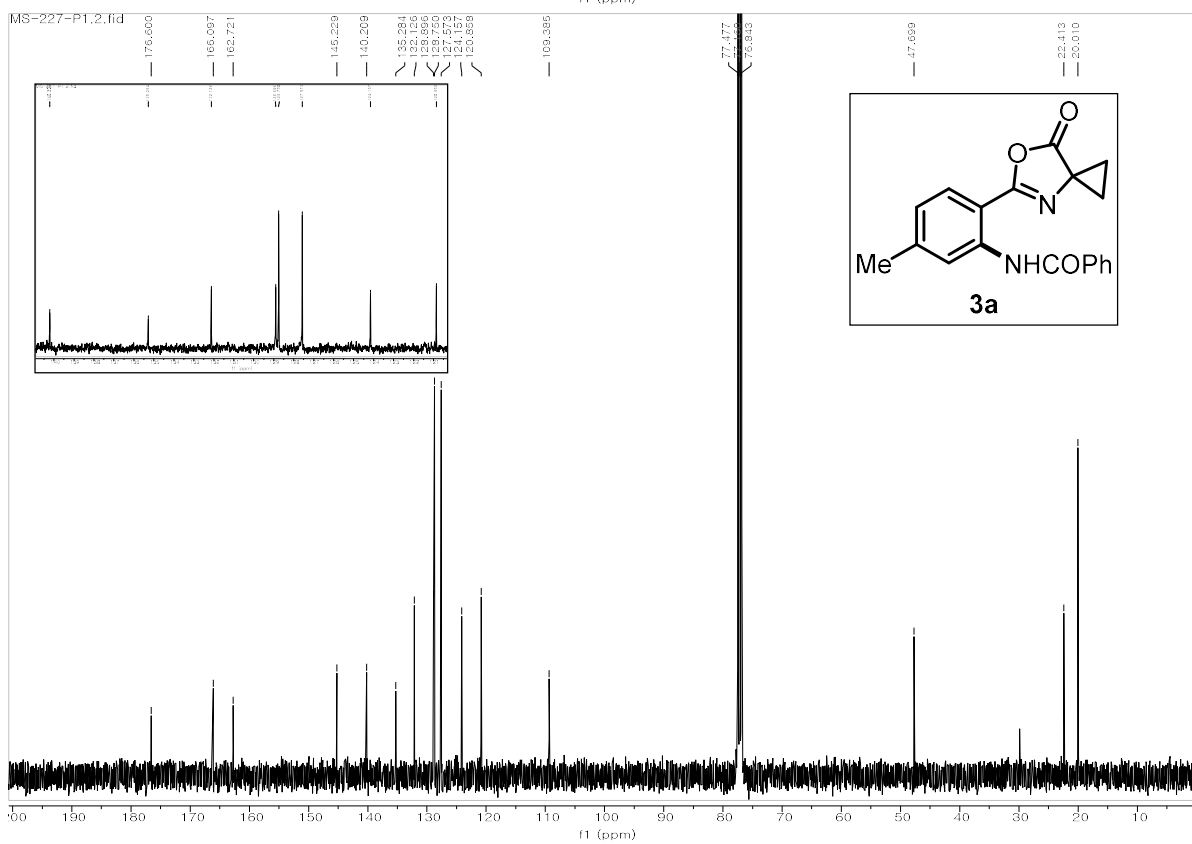



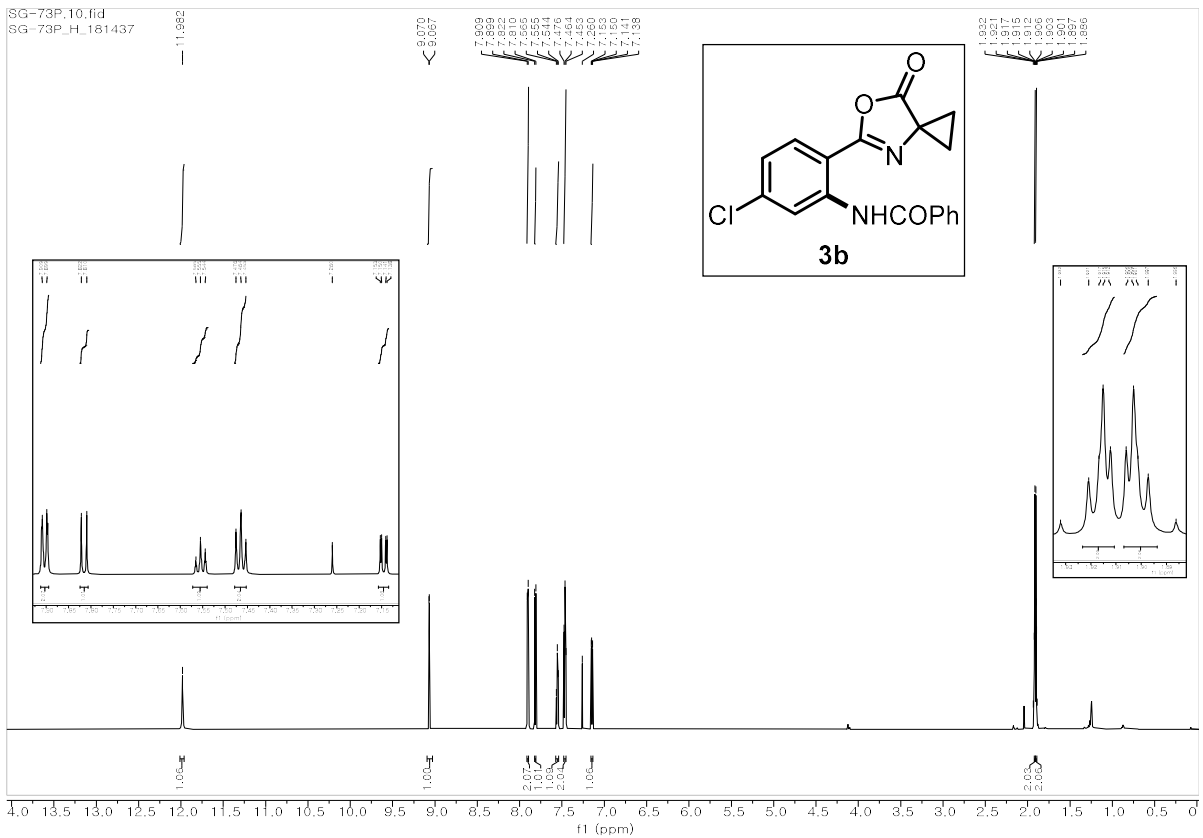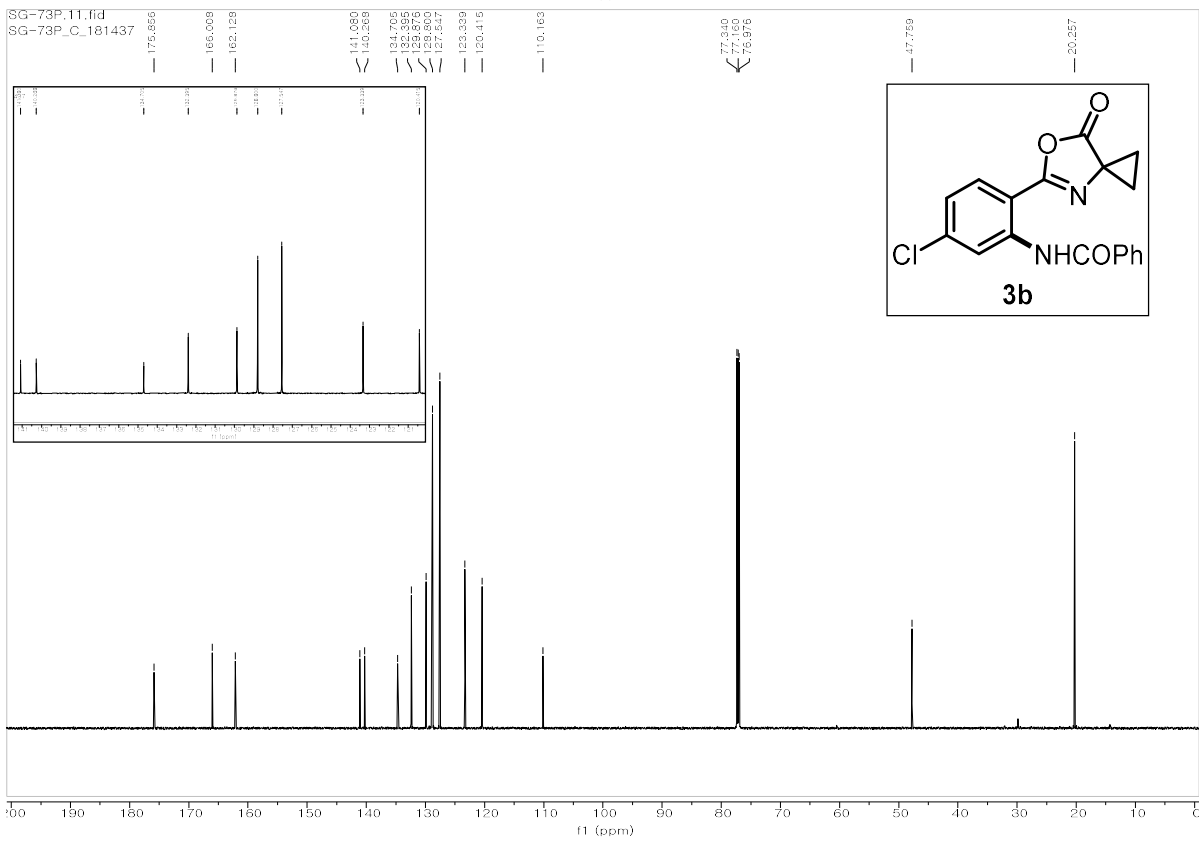



SG85-P1  
single\_pulse

105.193

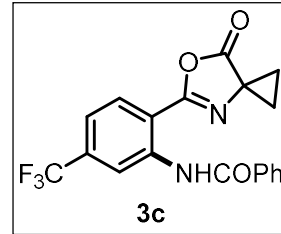

110 100 90 80 70 60 50 40 30 20  
t1 (ppm)





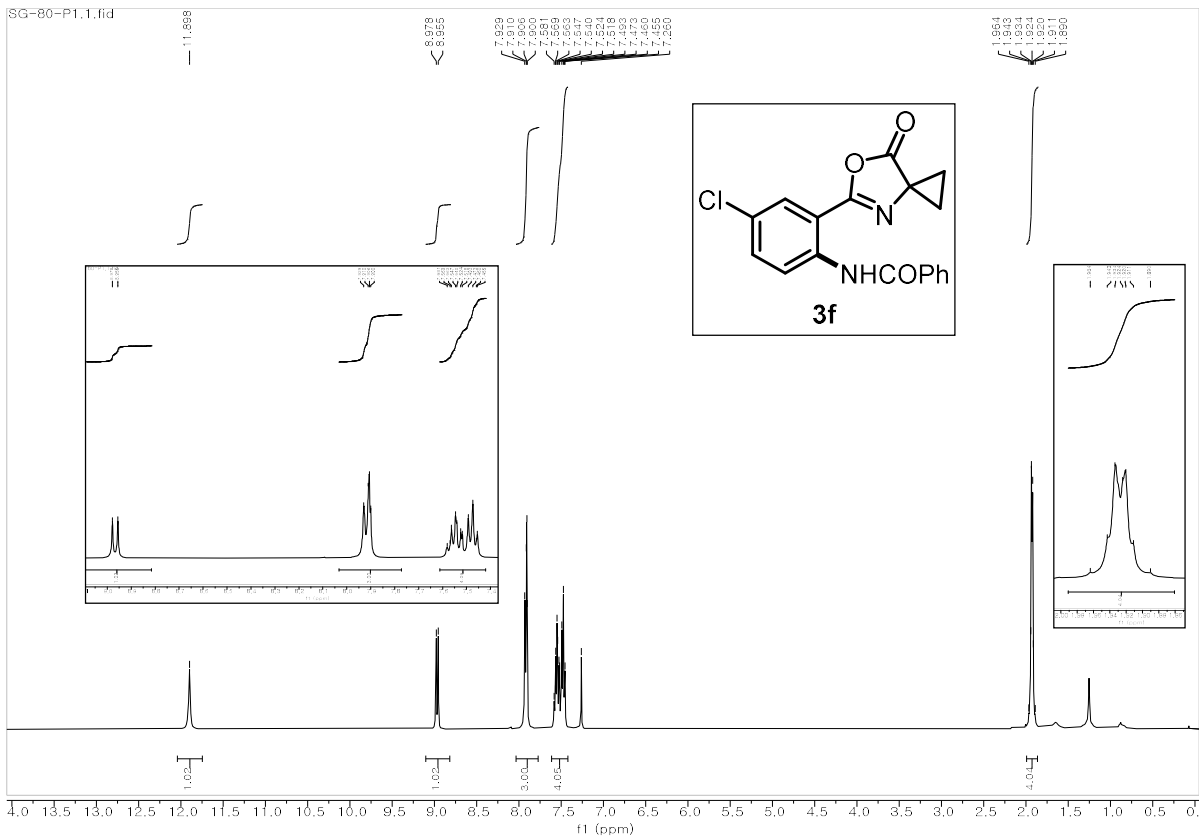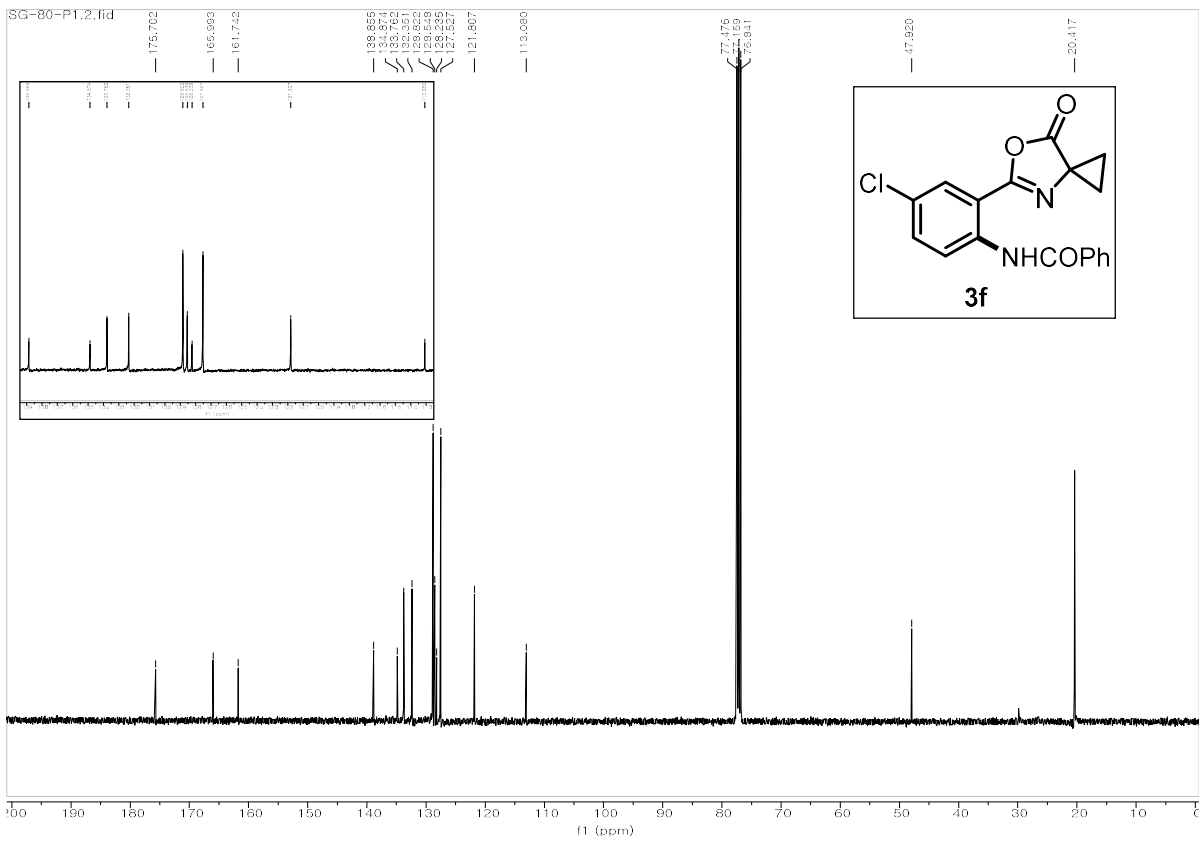

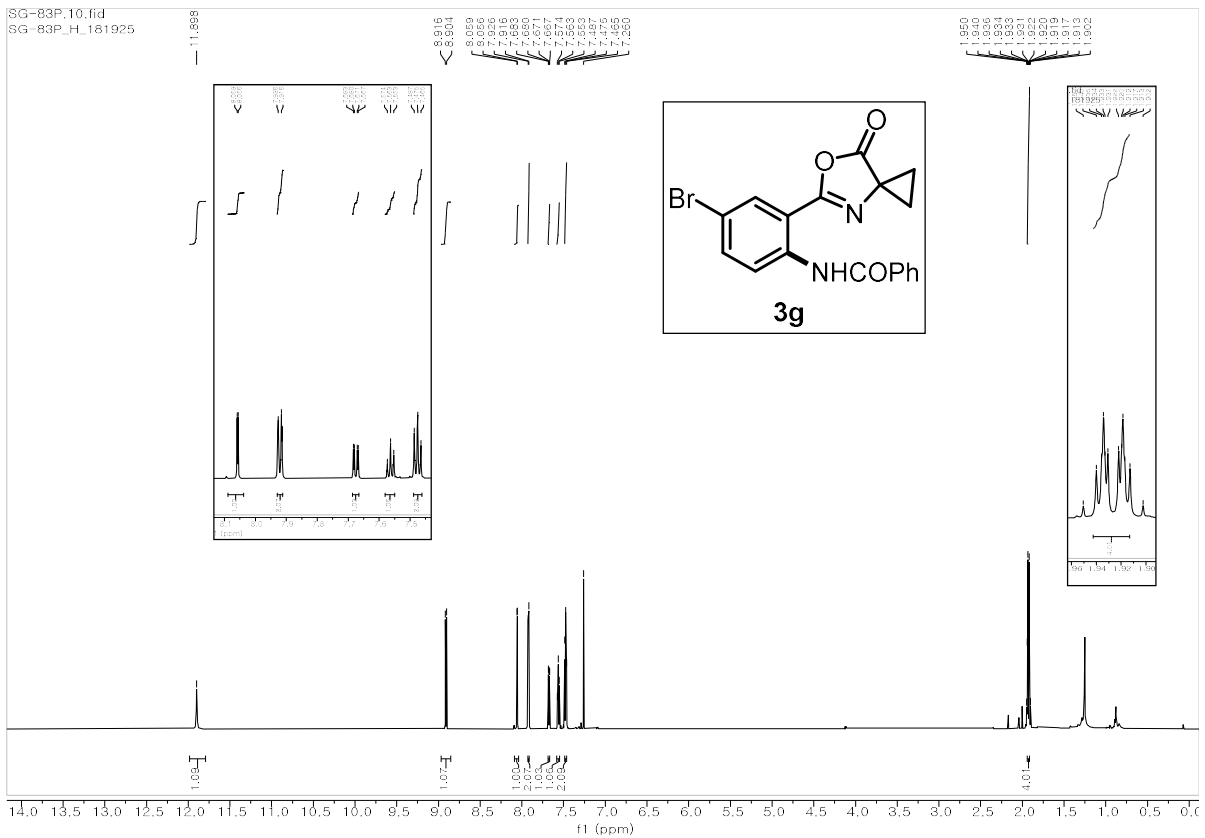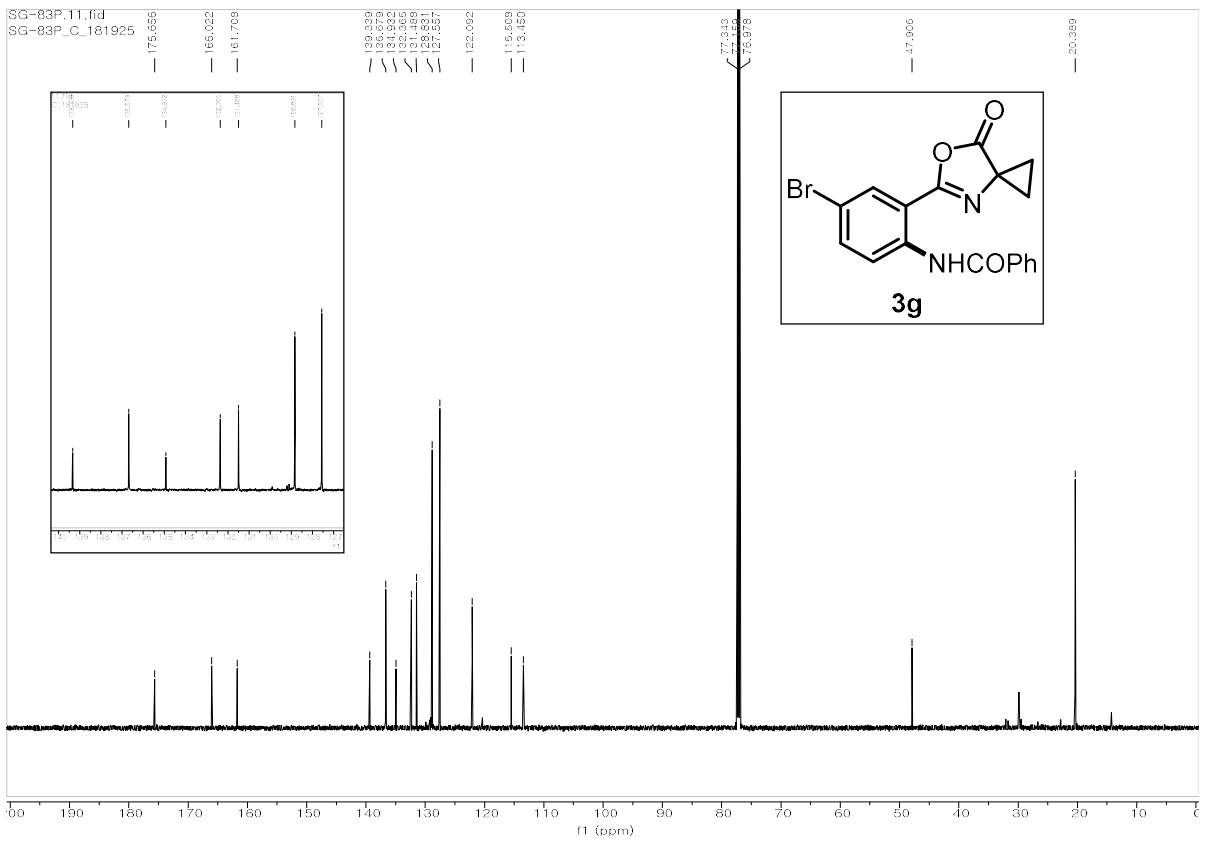

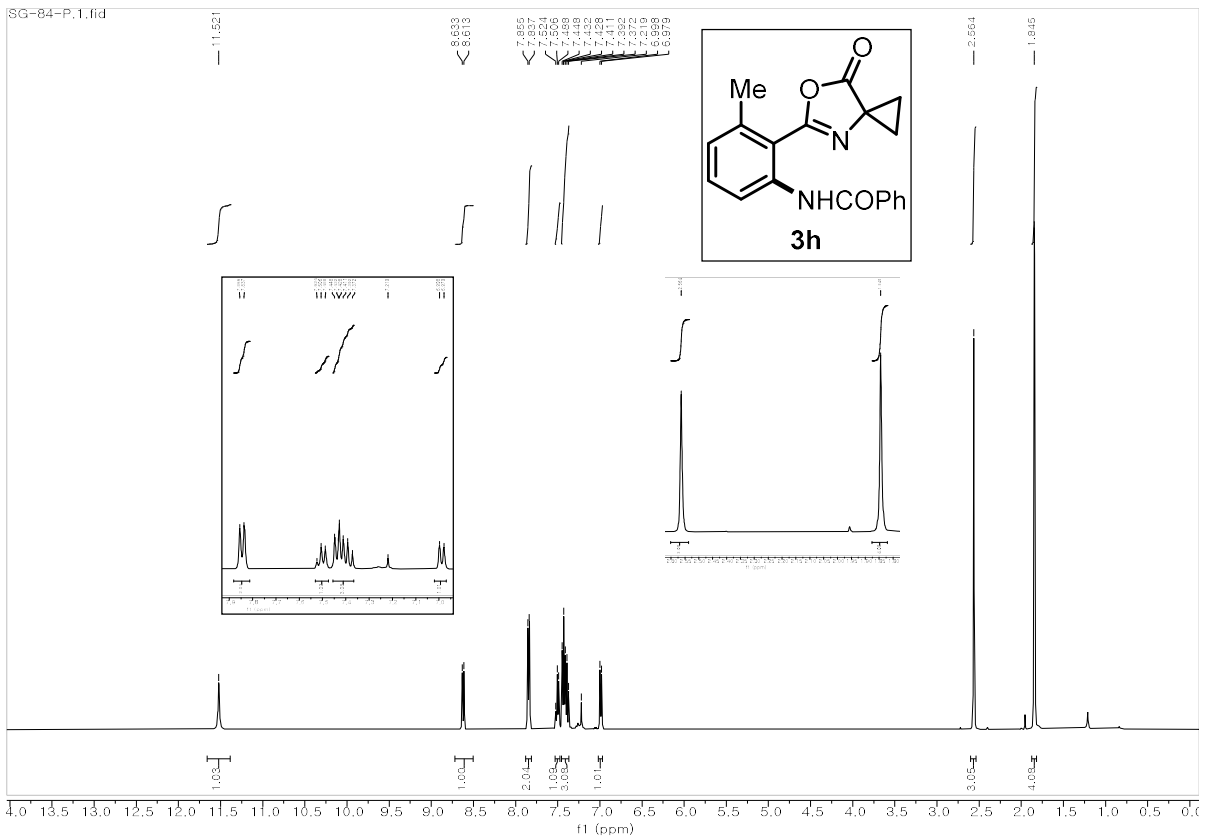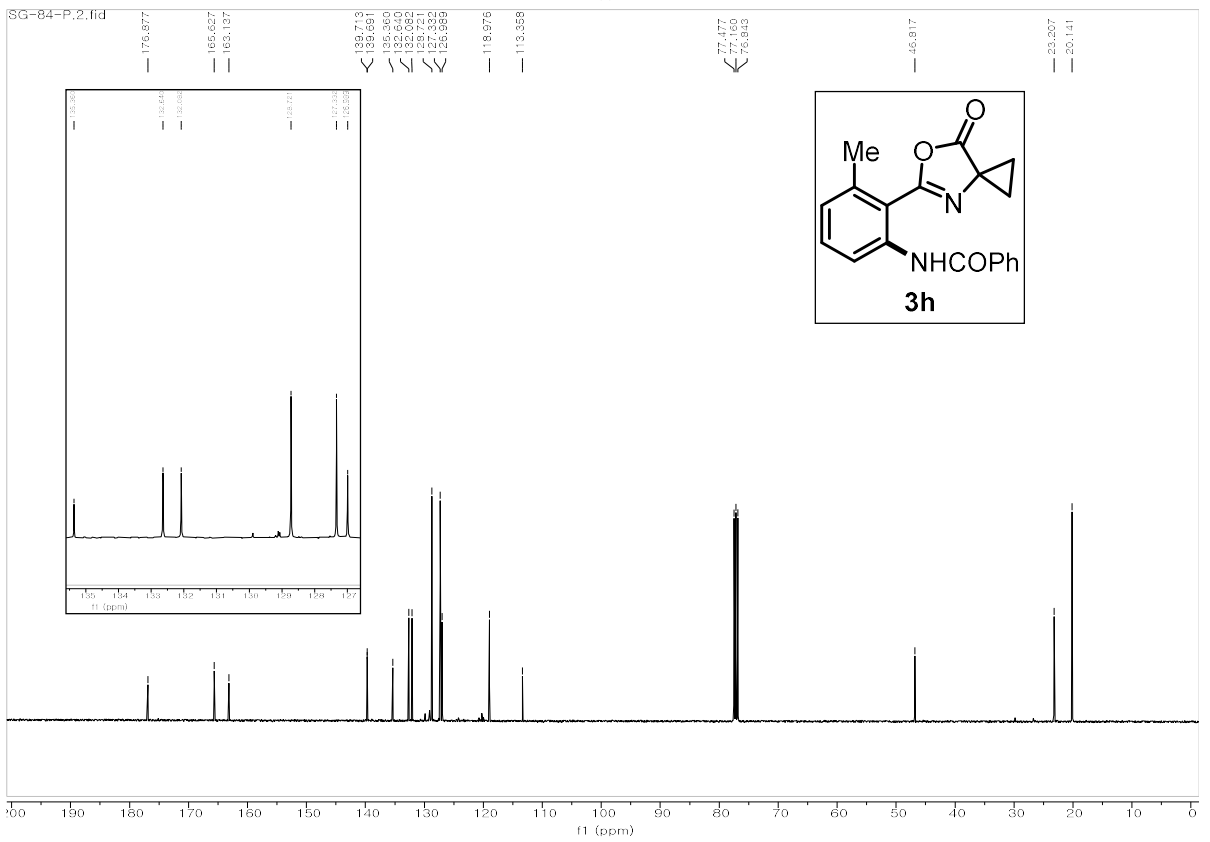



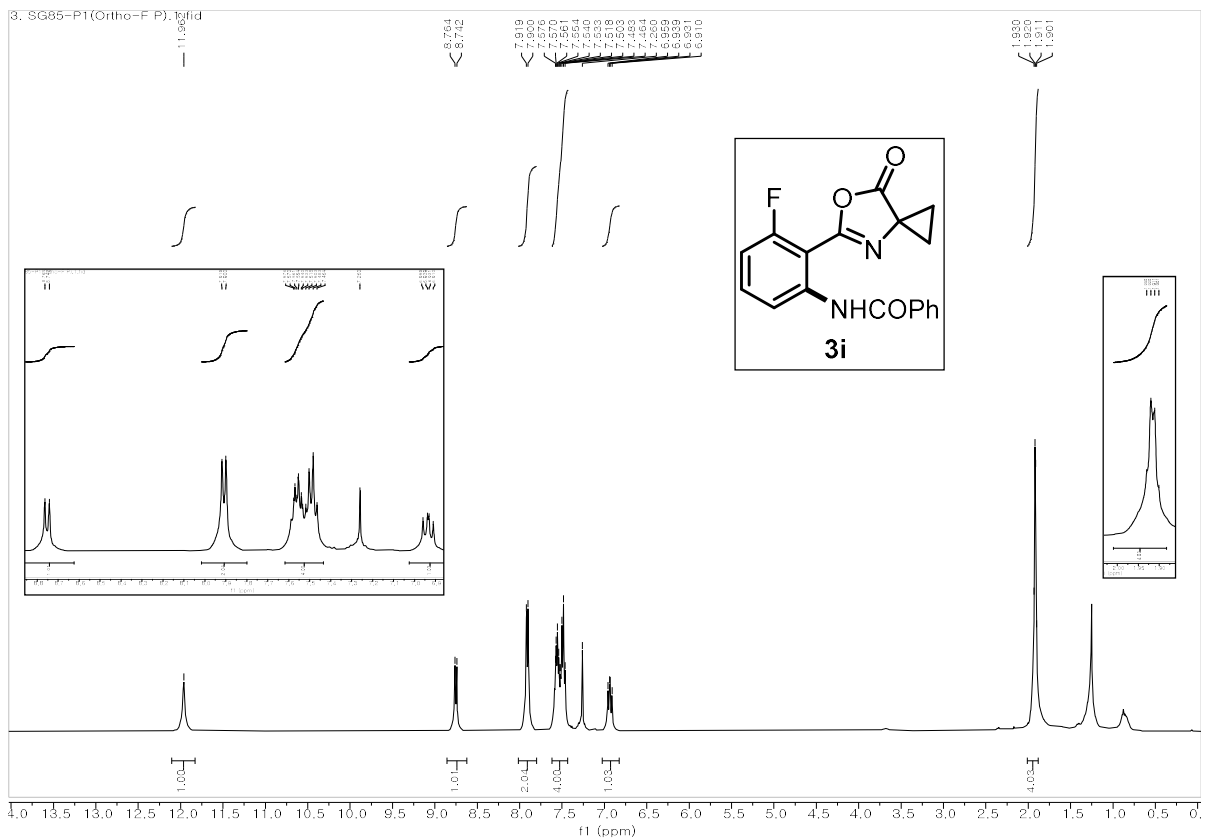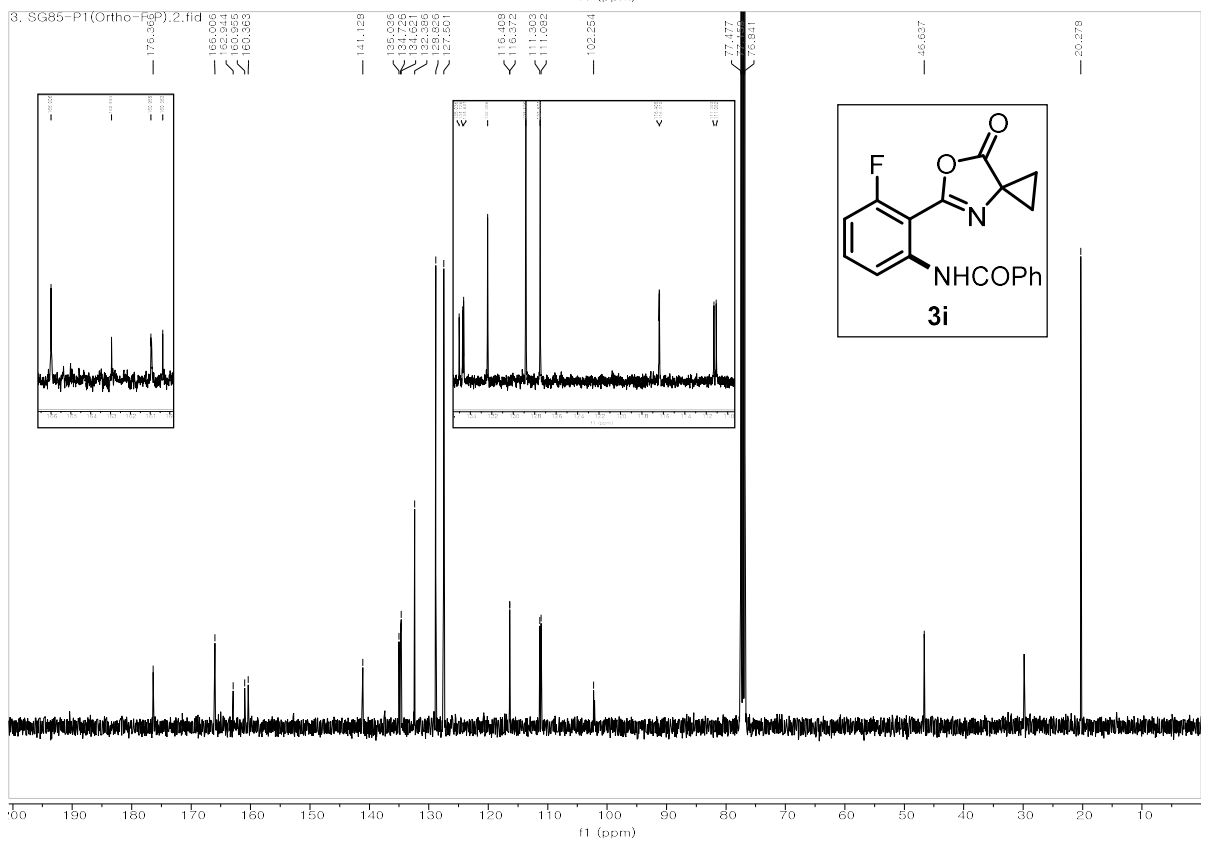

SG74-P  
single\_pulse

66.267

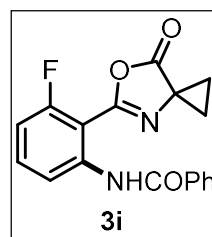

125 120 115 110 105 100 95 90 85 80 75 70 65 60 55 50 45 40 35 30 25 20 15 10 5

f1 (ppm)

SG-108-P1.1.fid

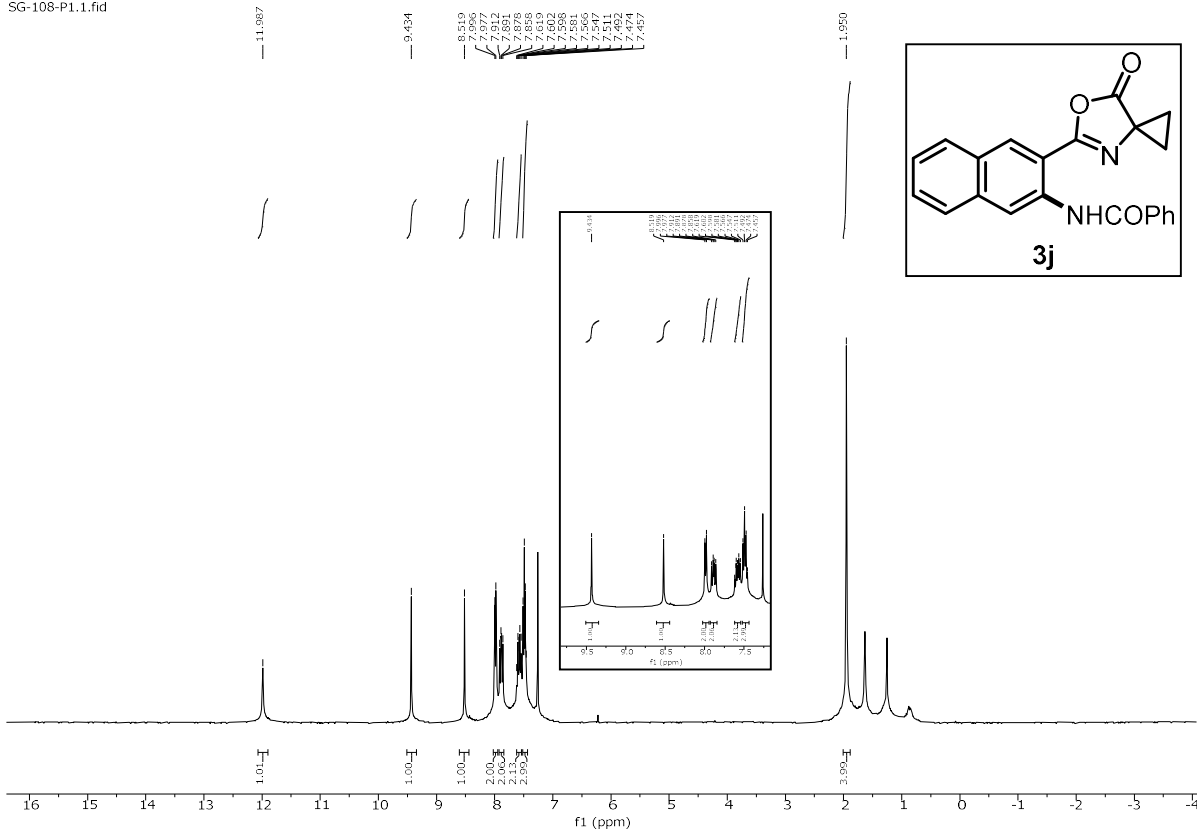

SG-108-P1.2.fid

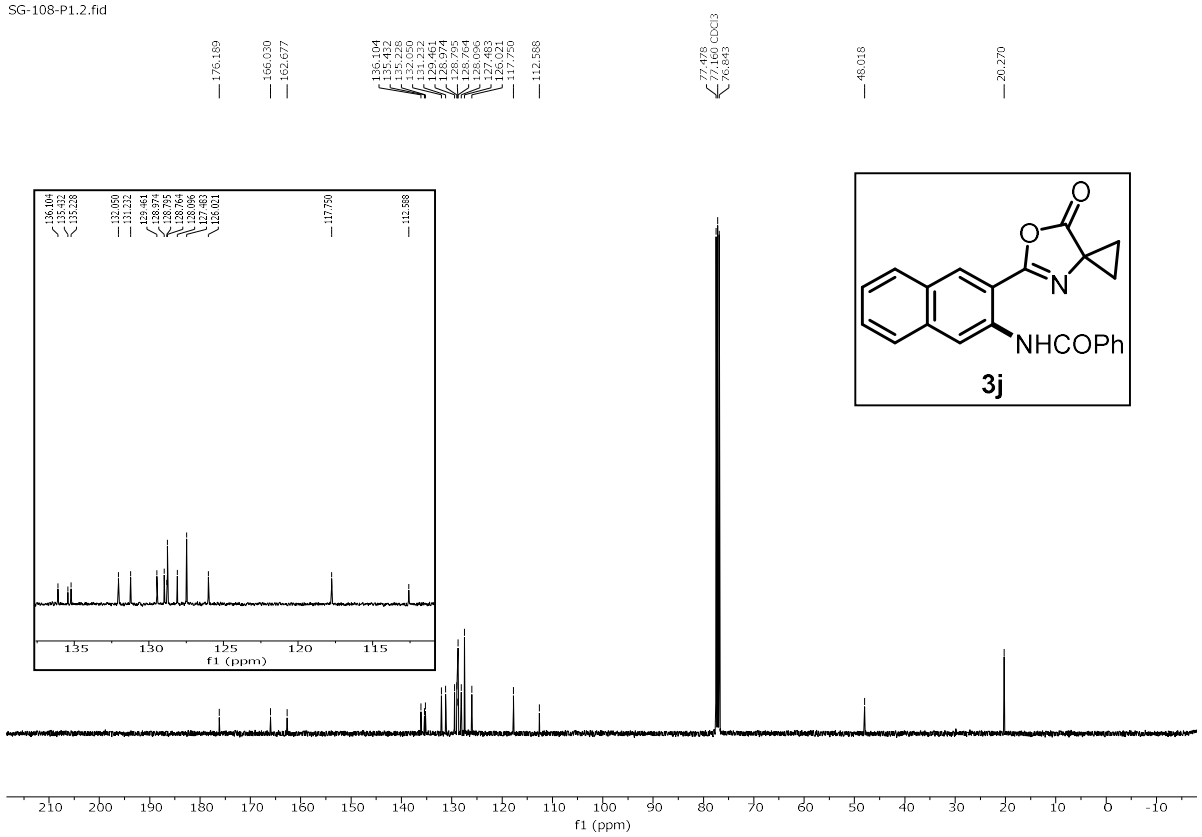

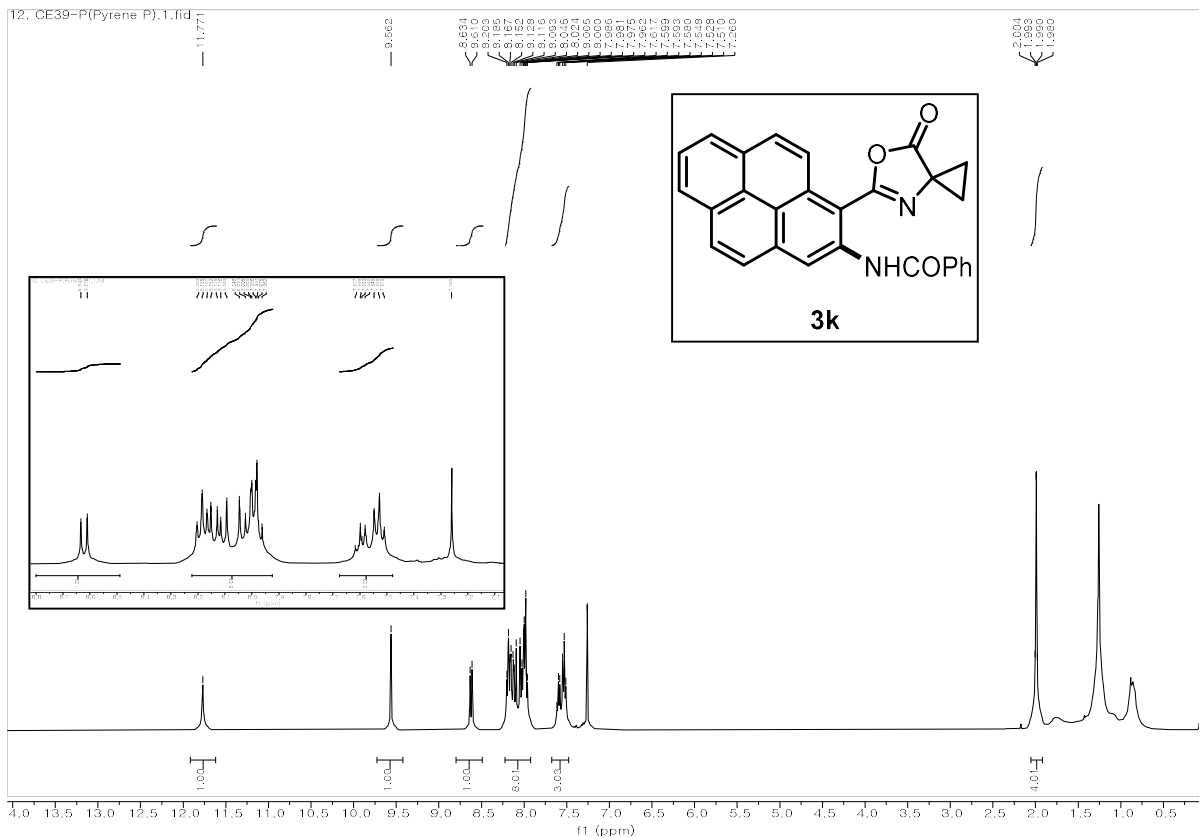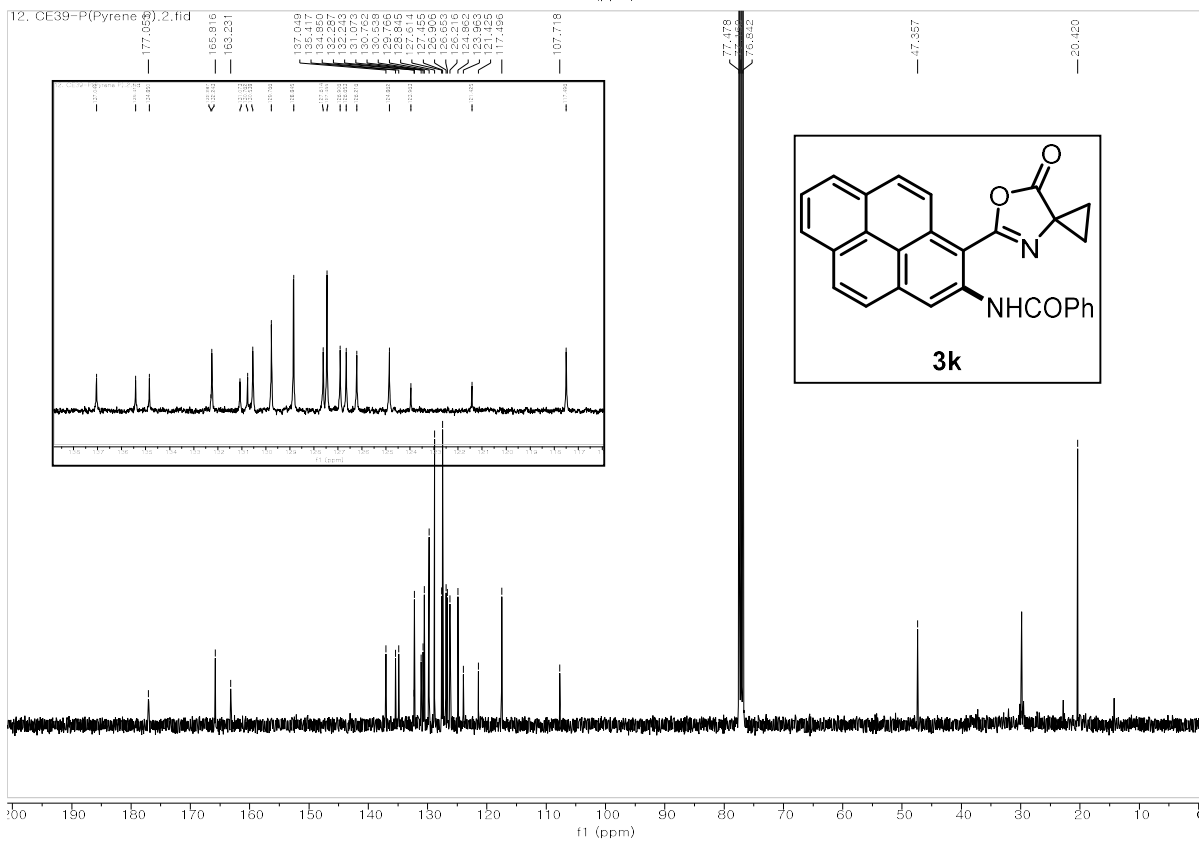

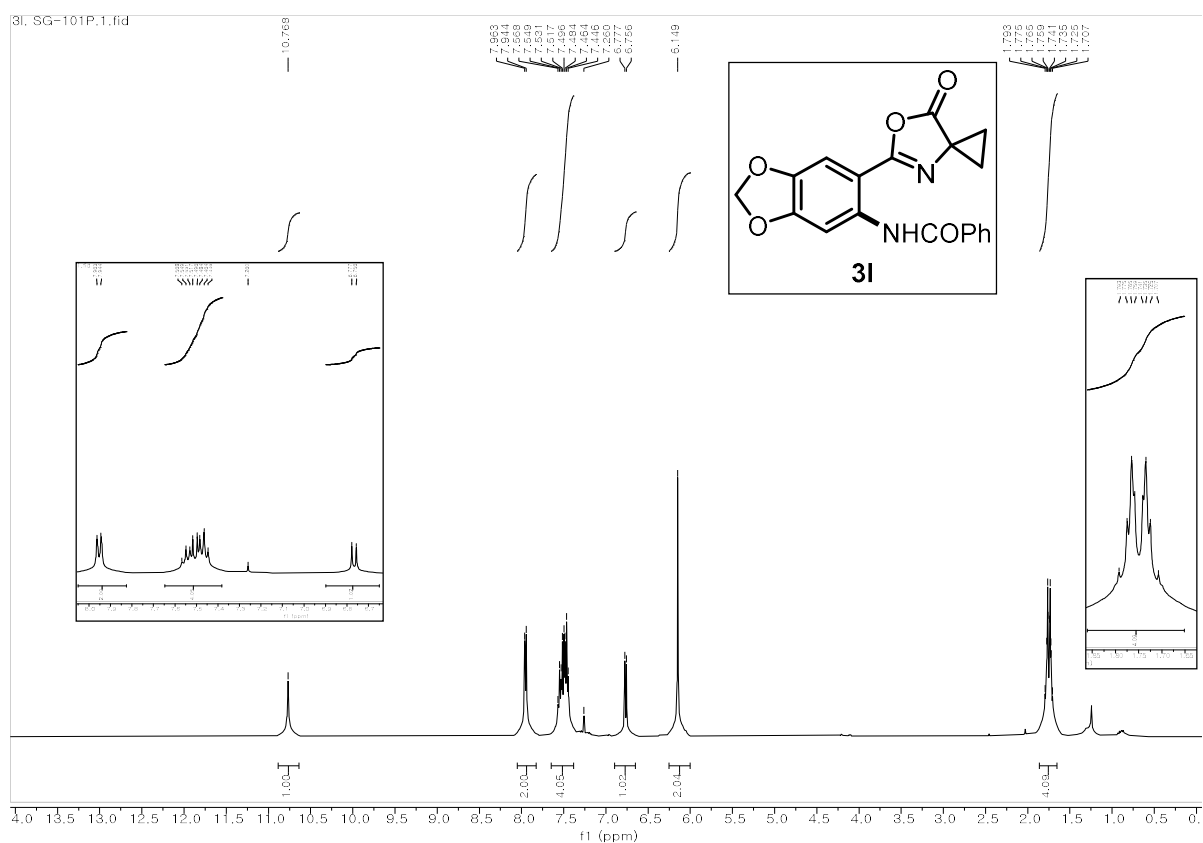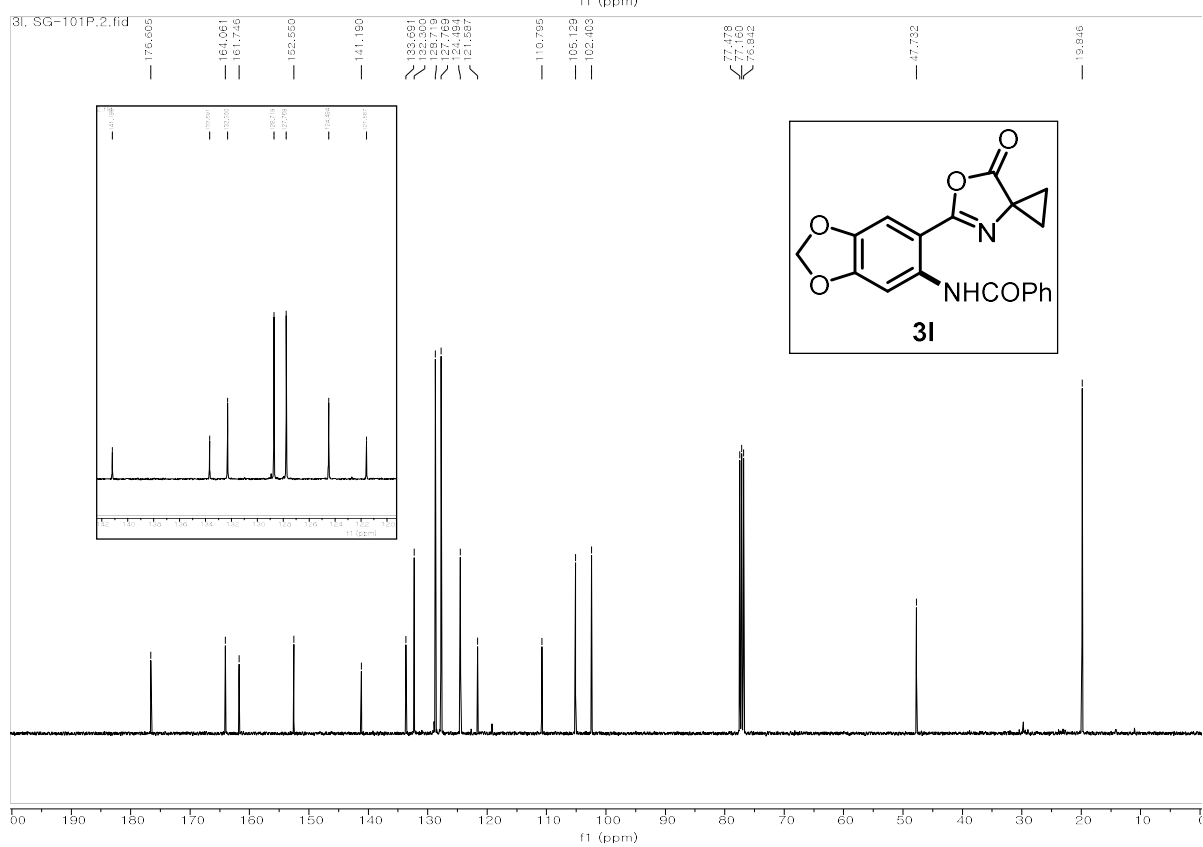

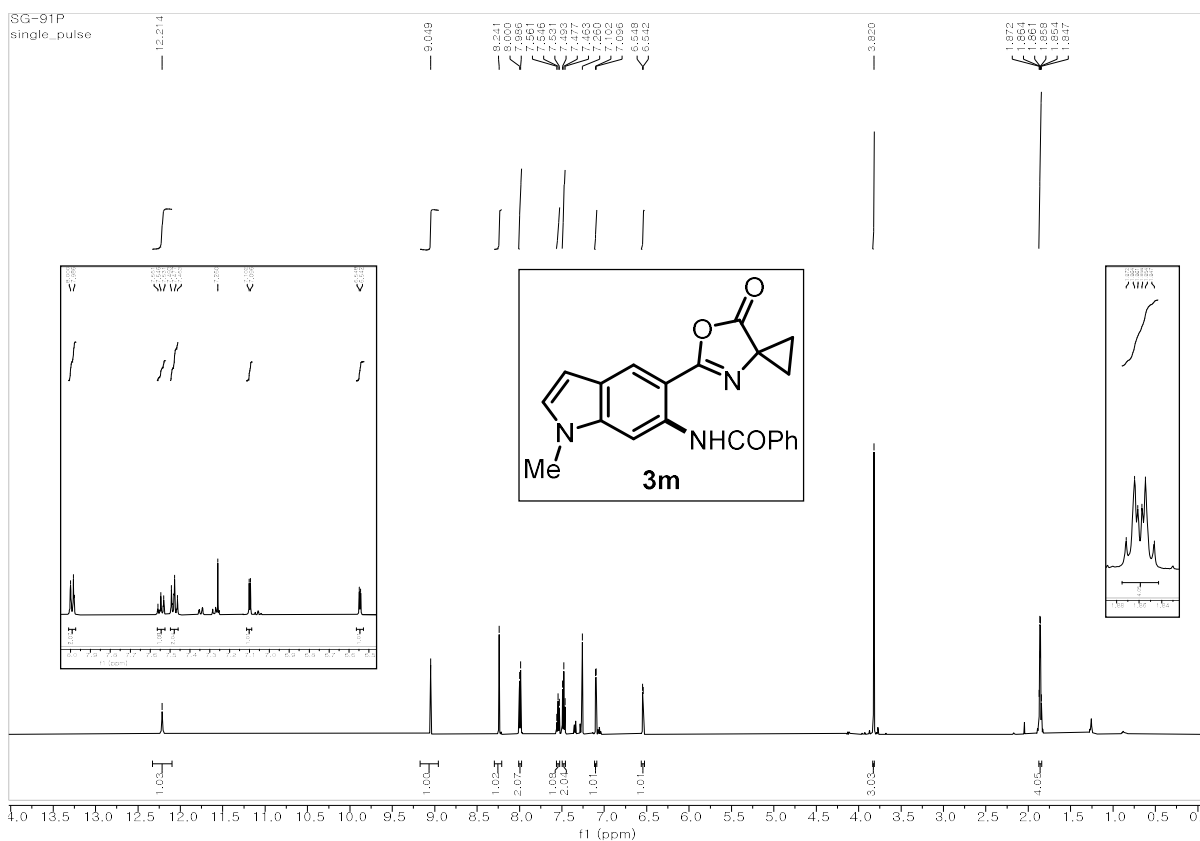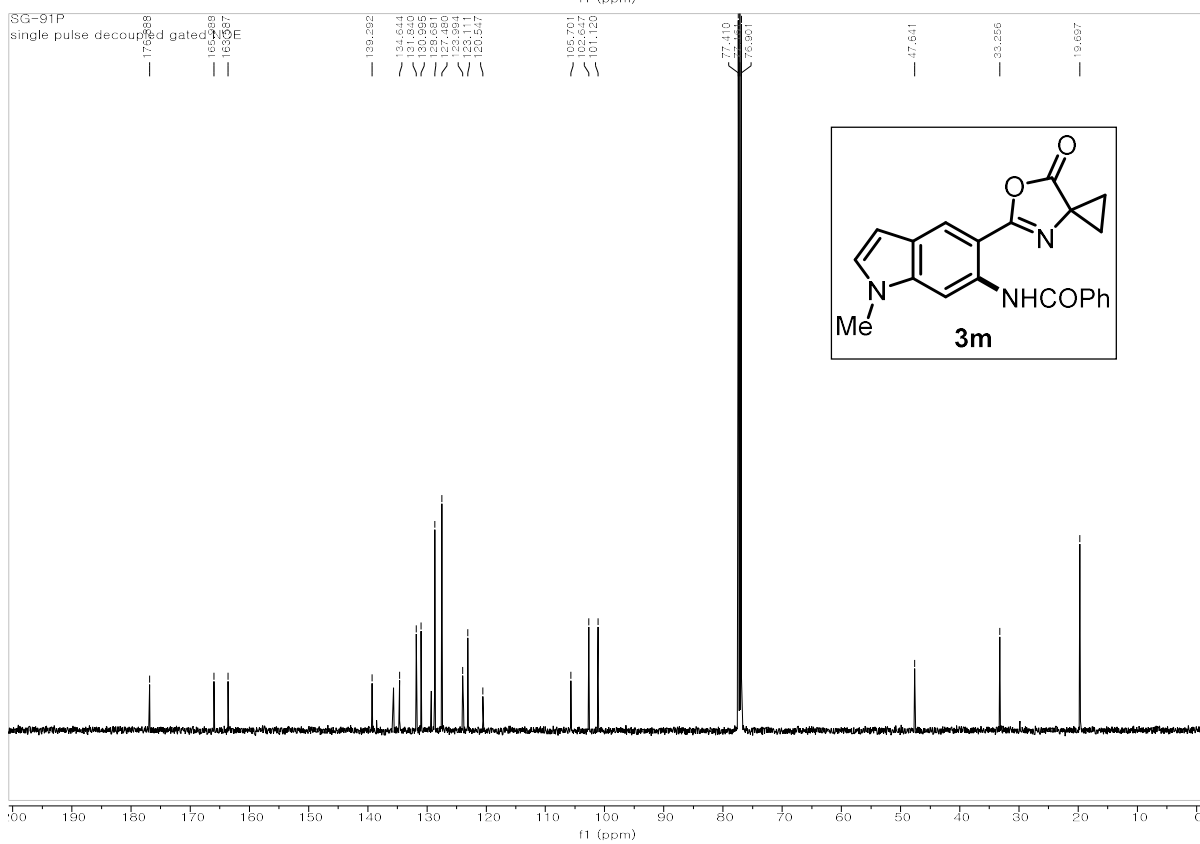

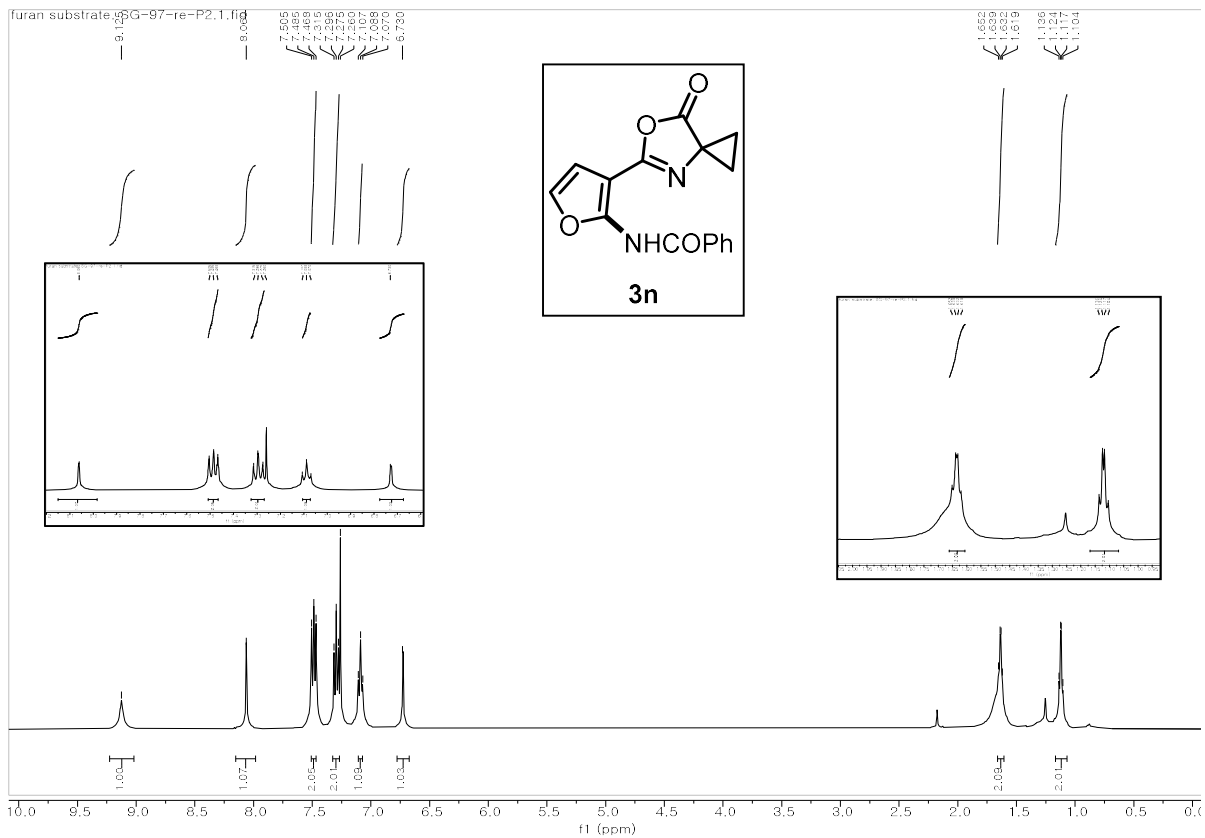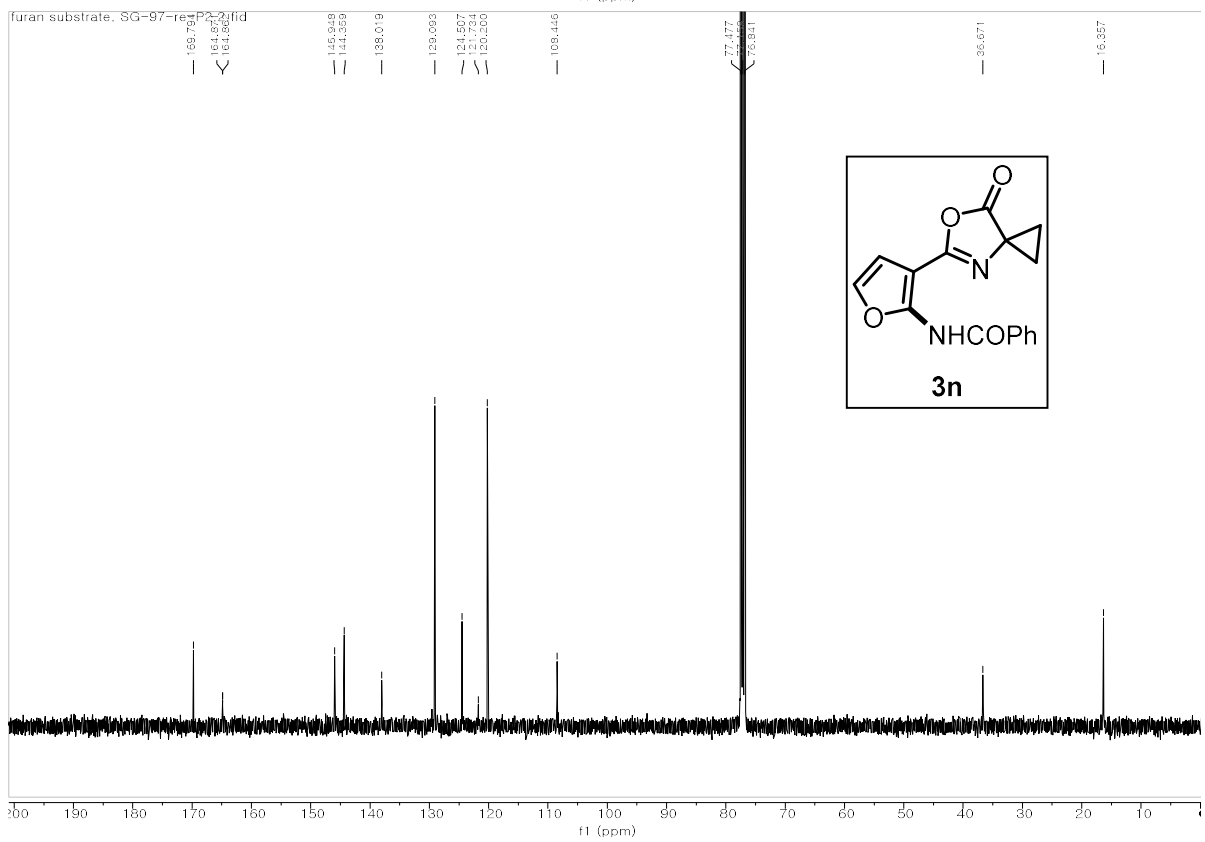

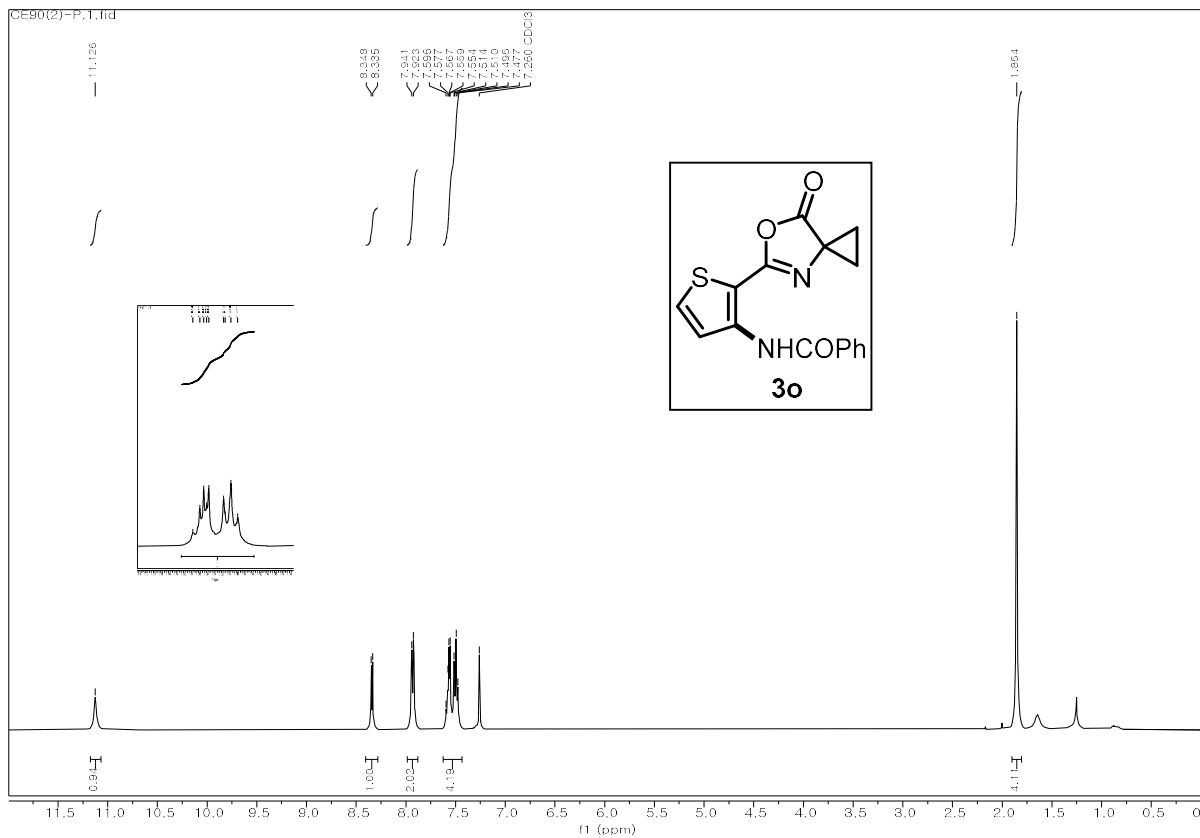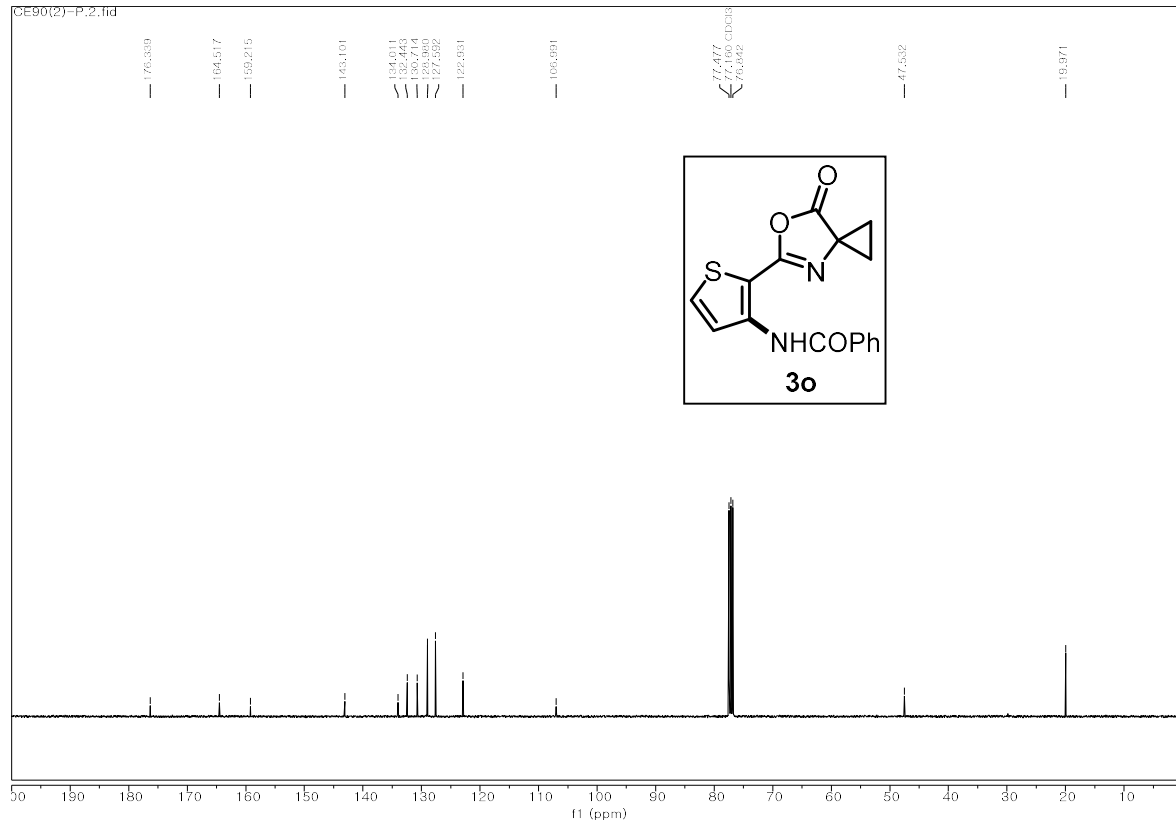



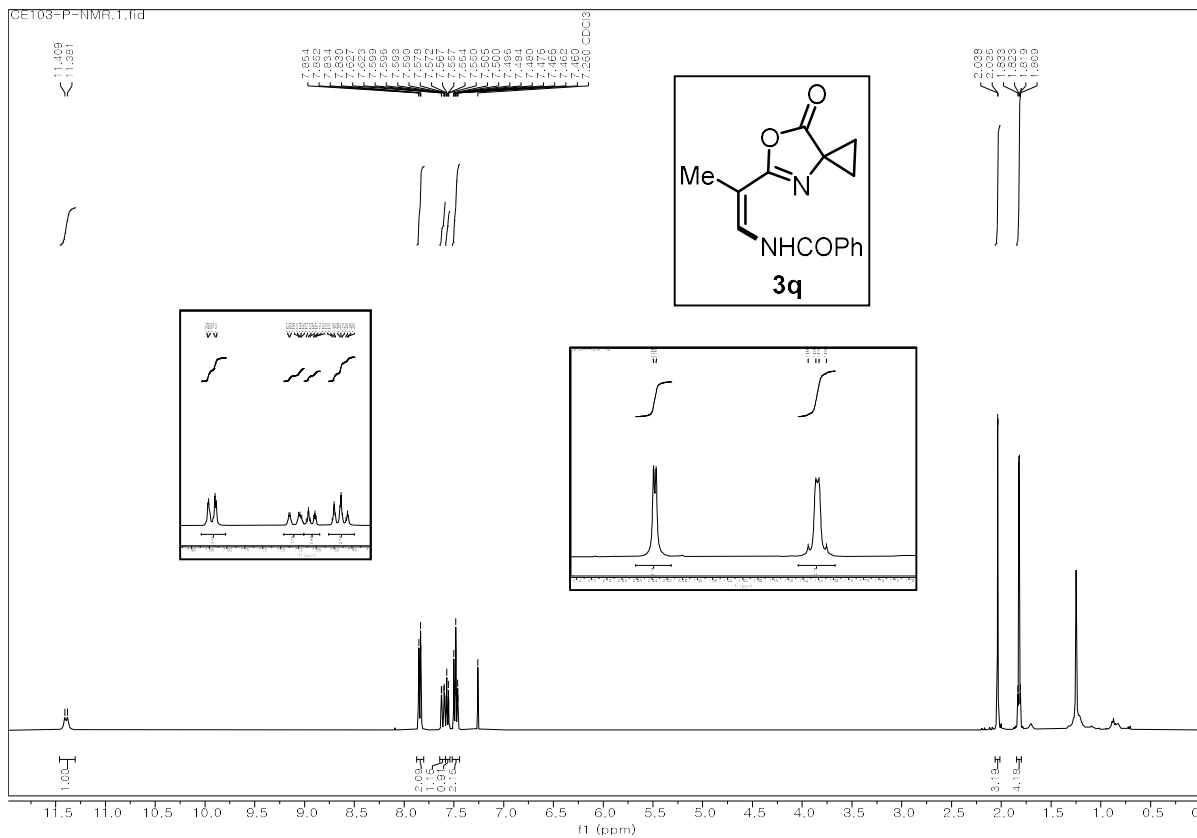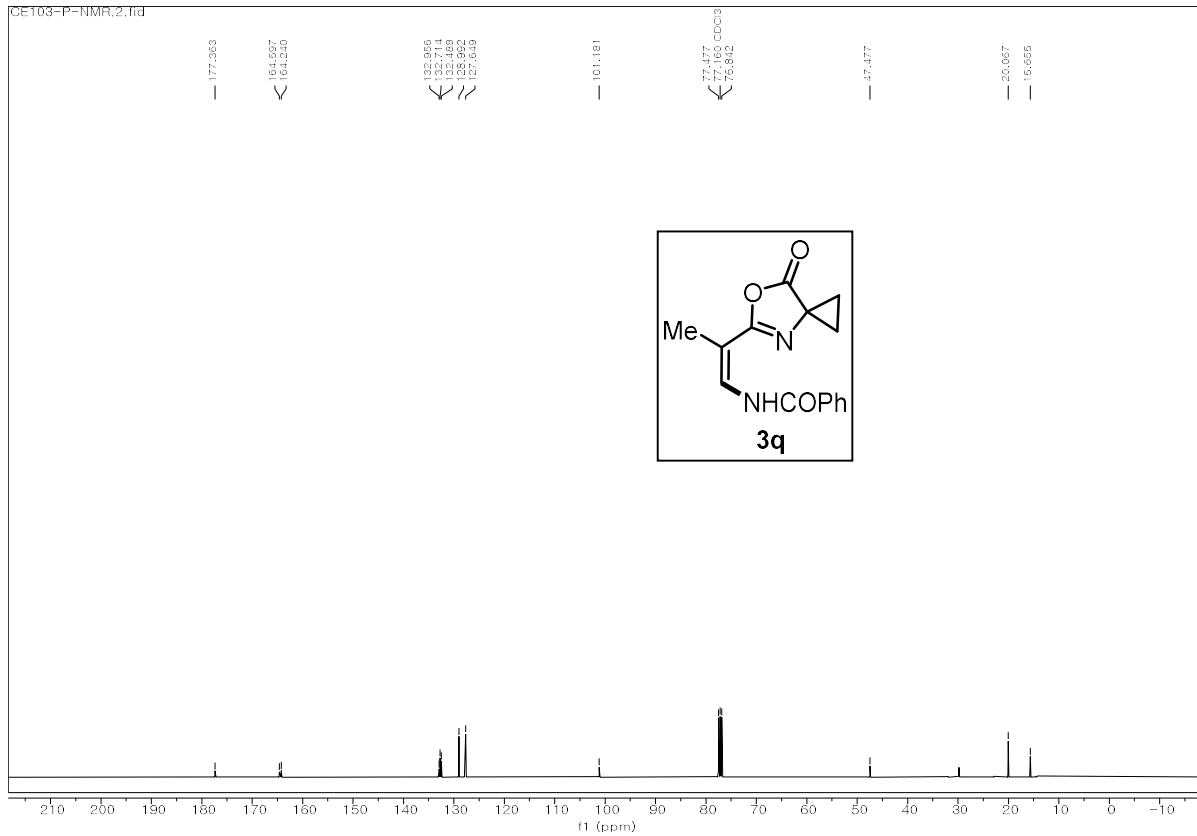

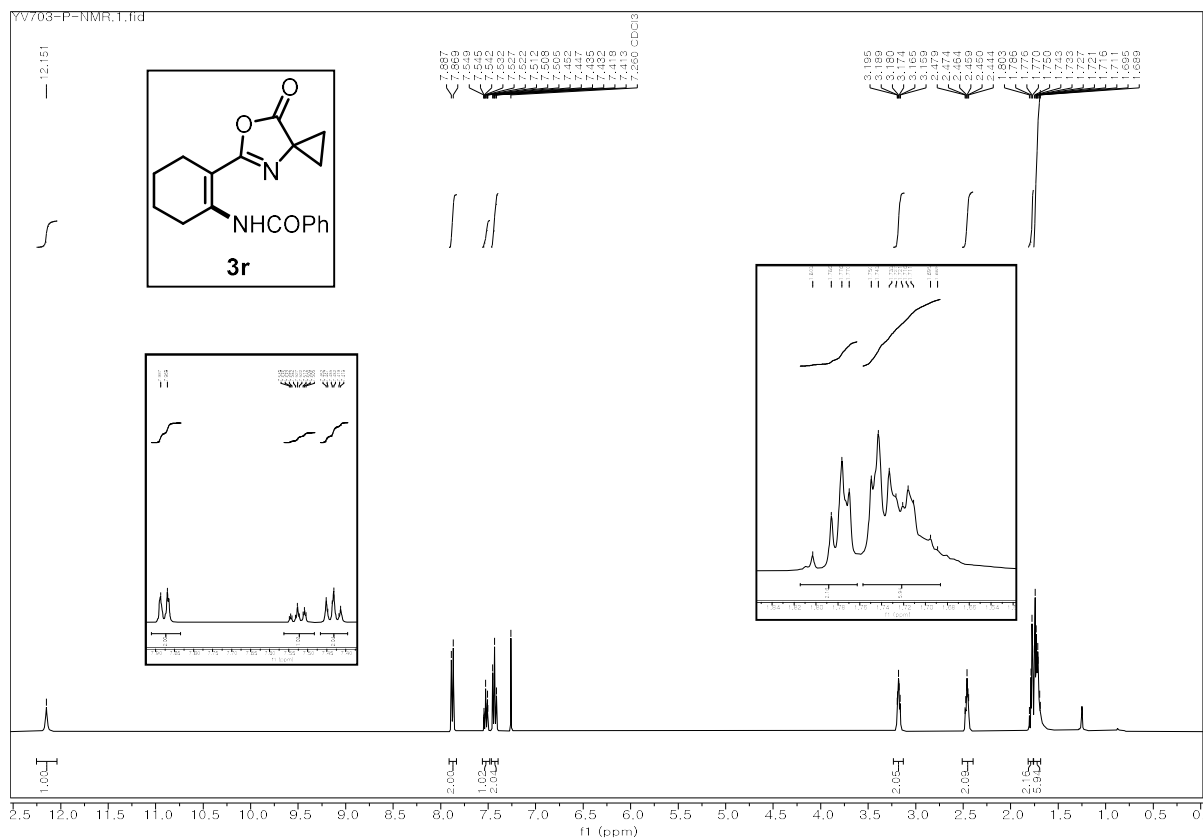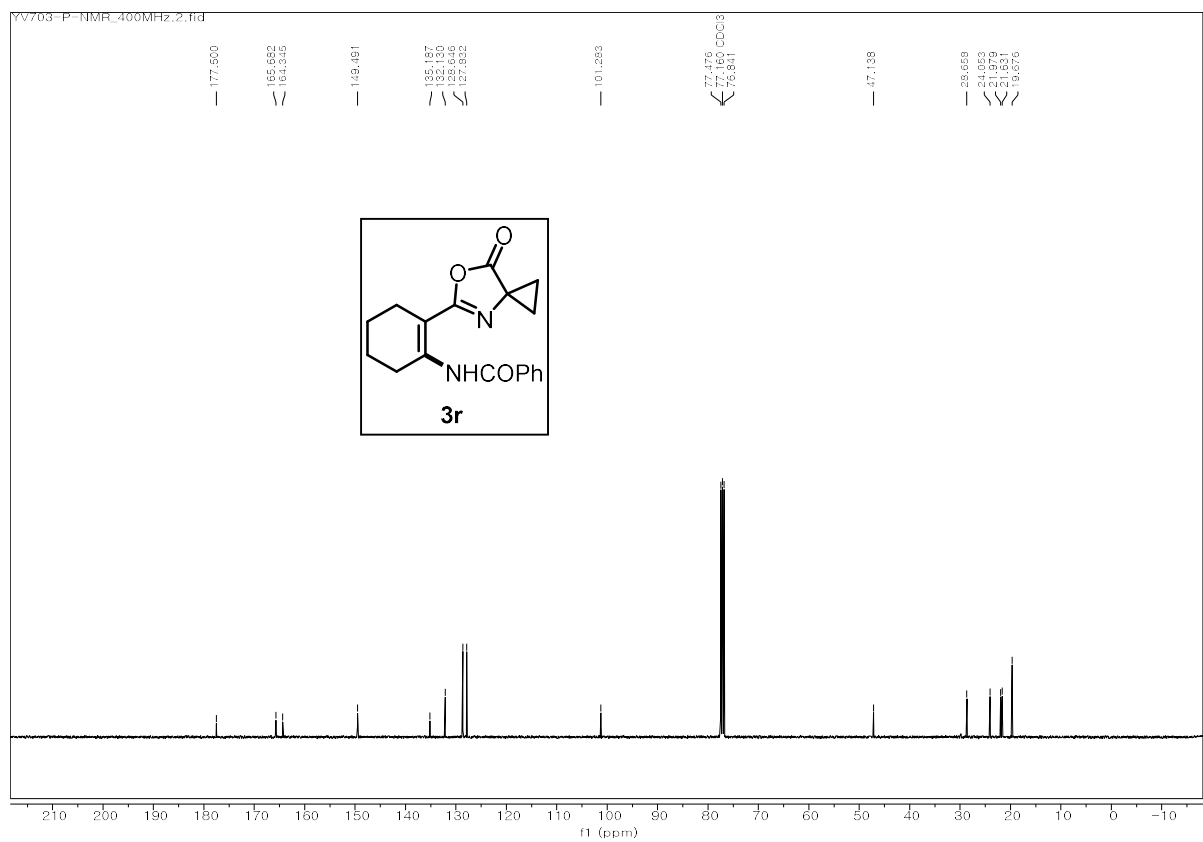

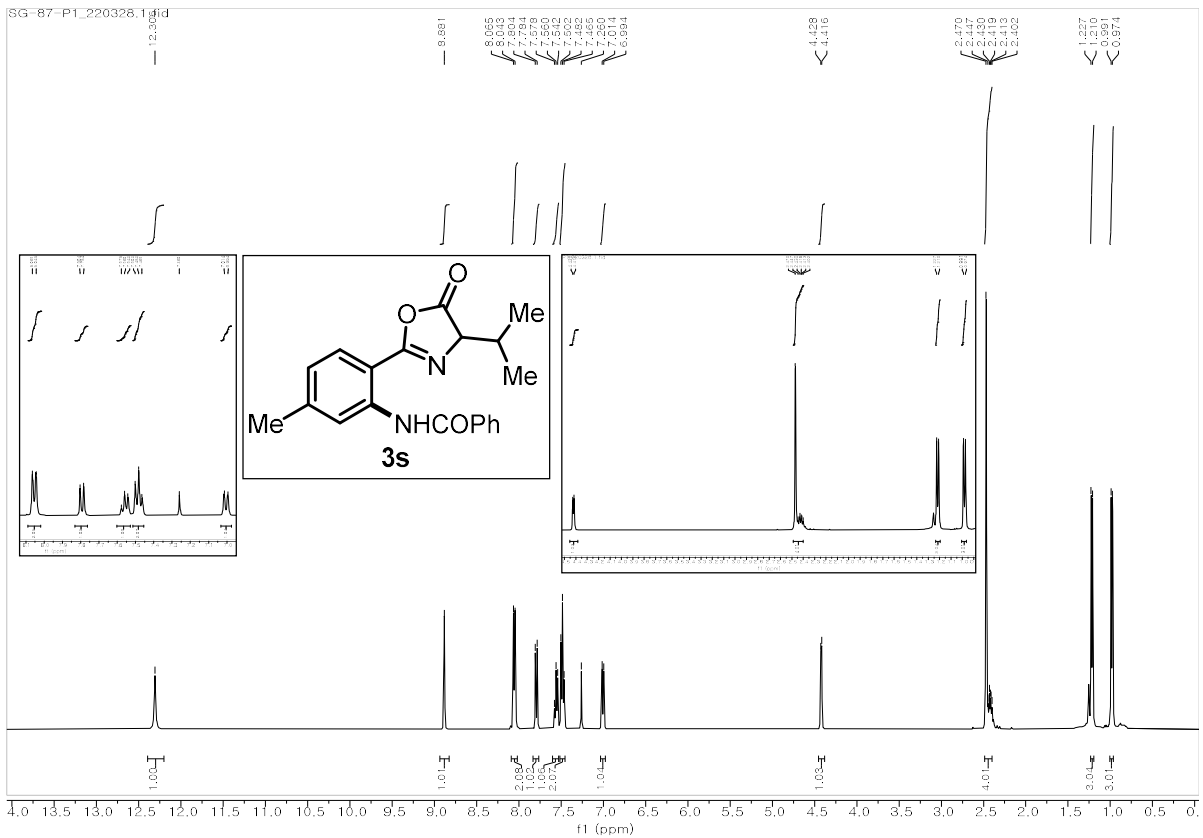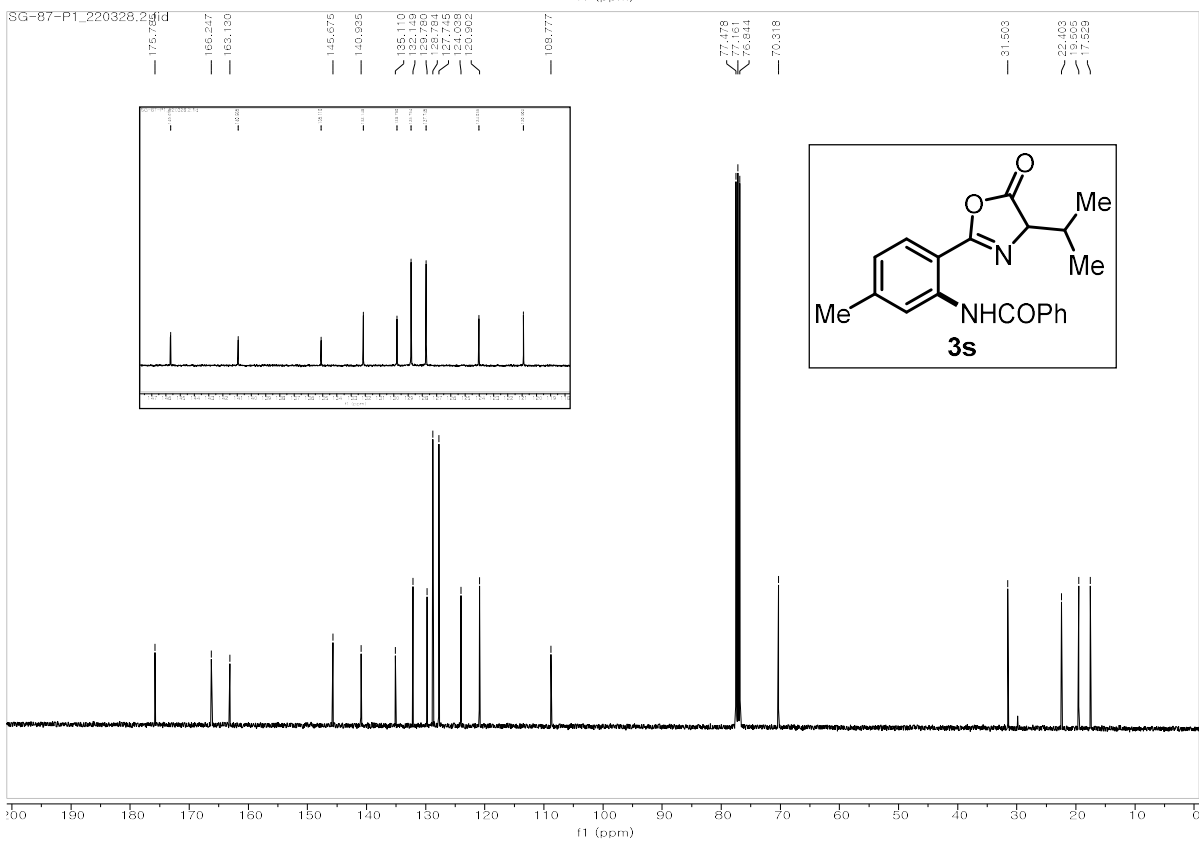

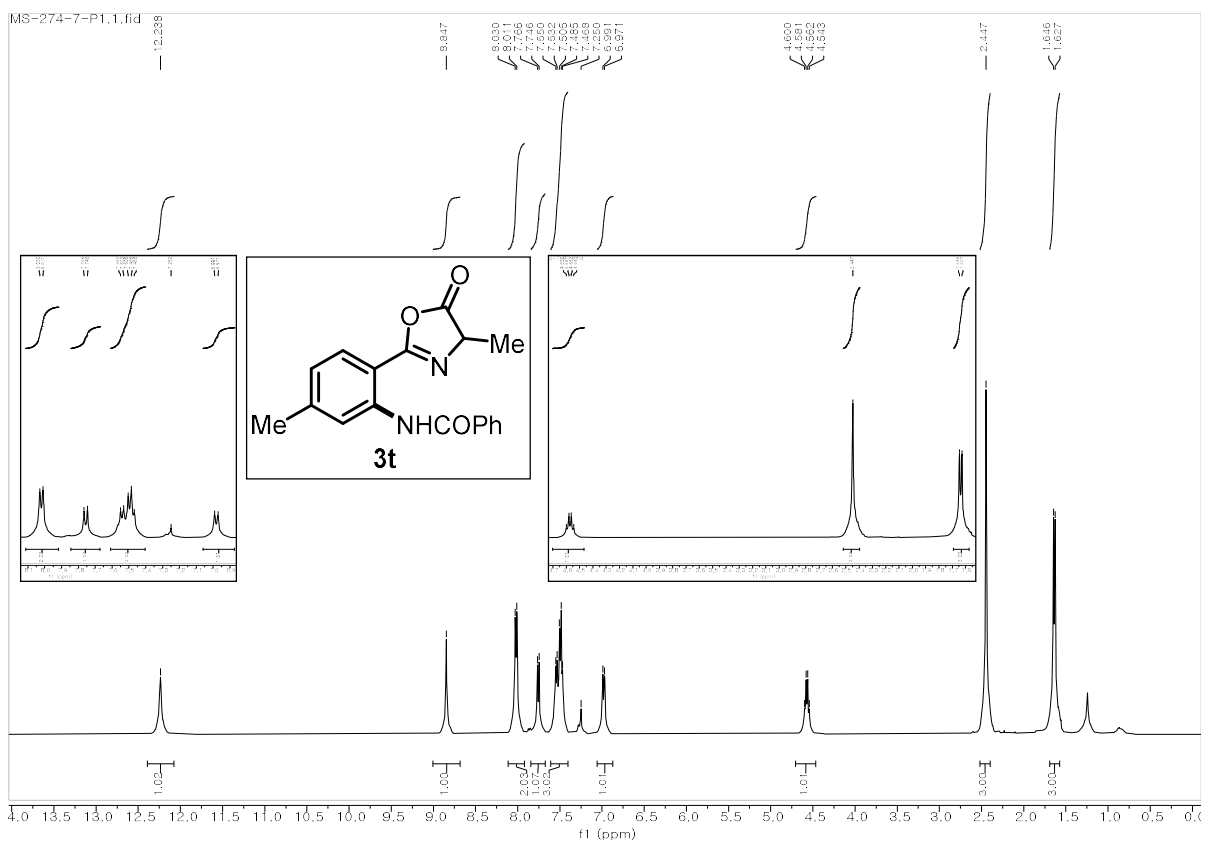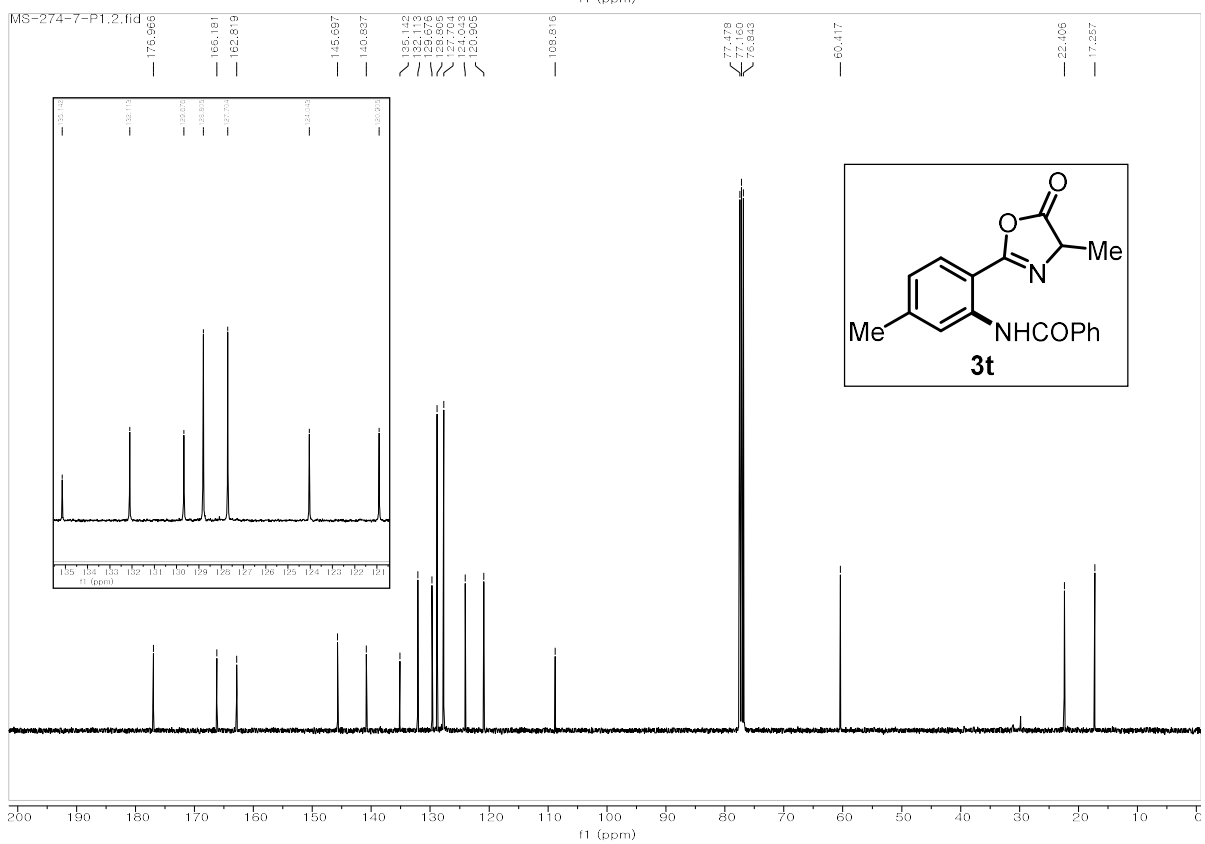

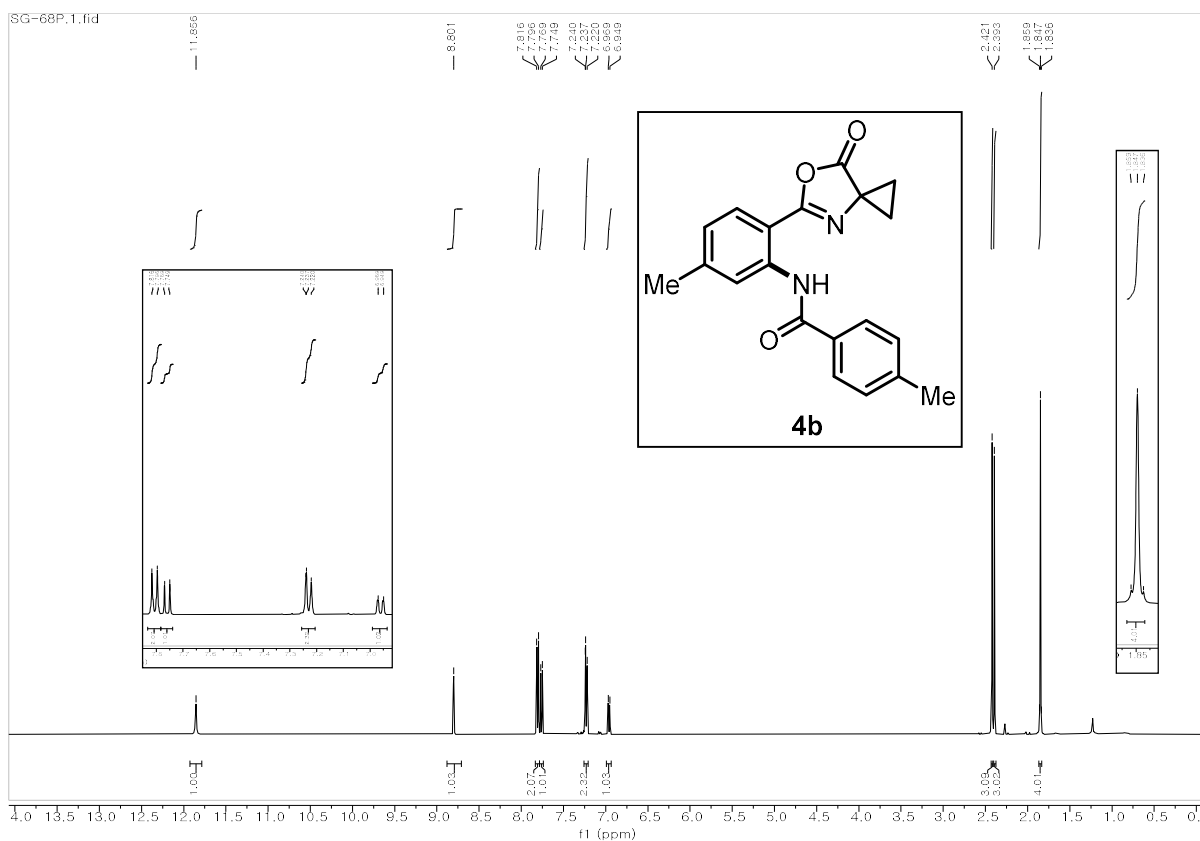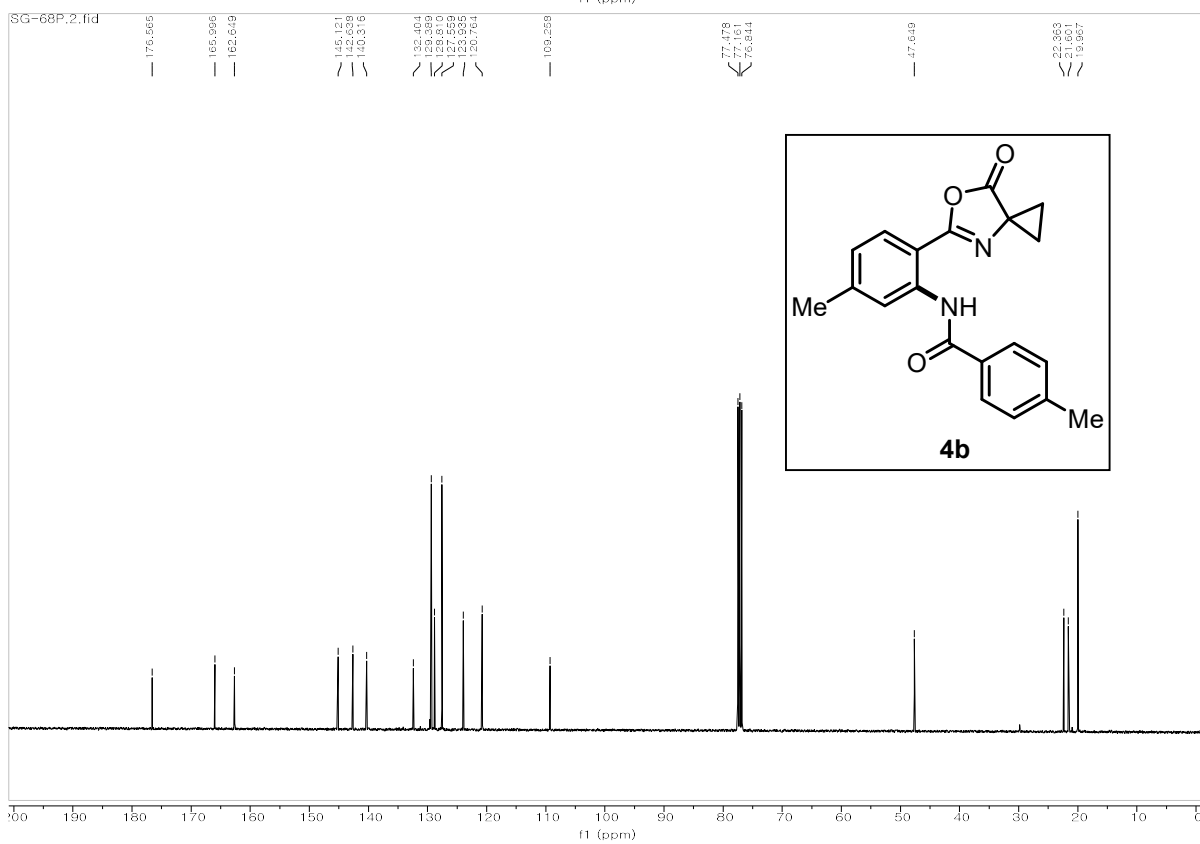

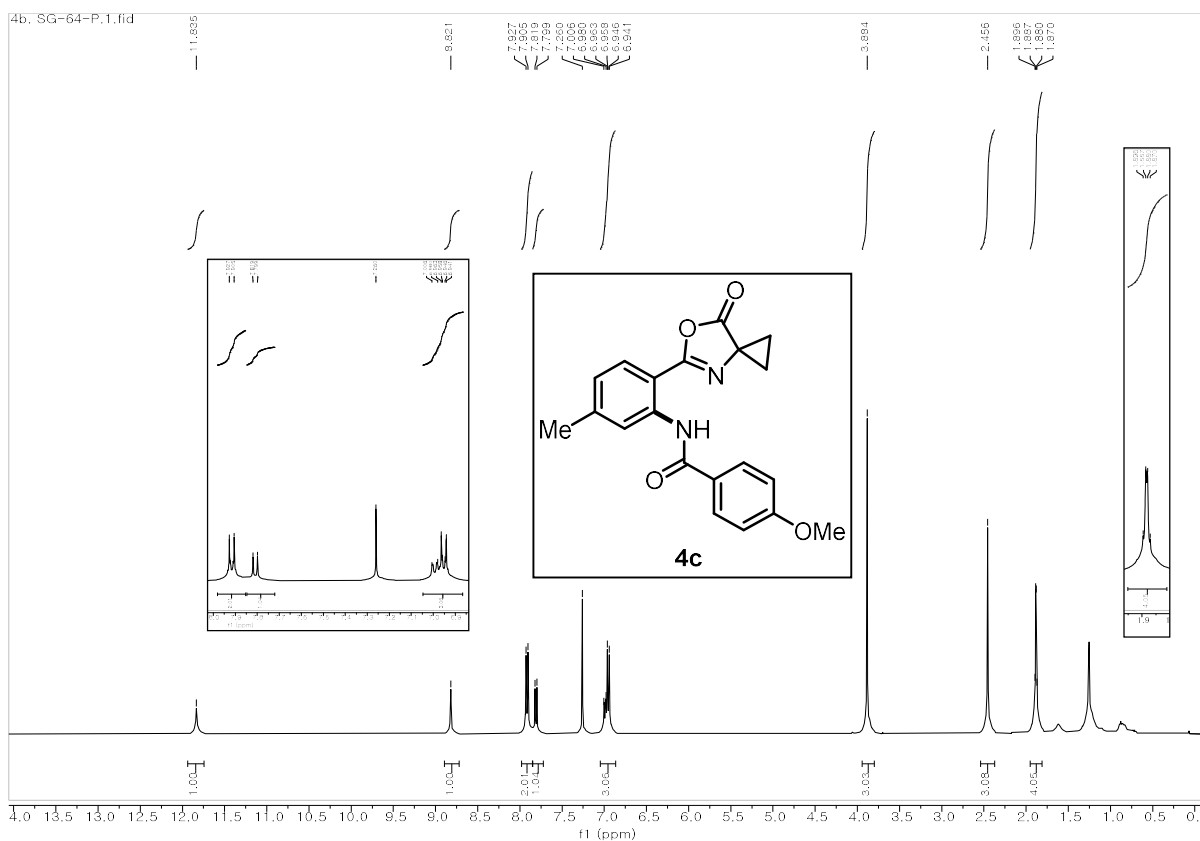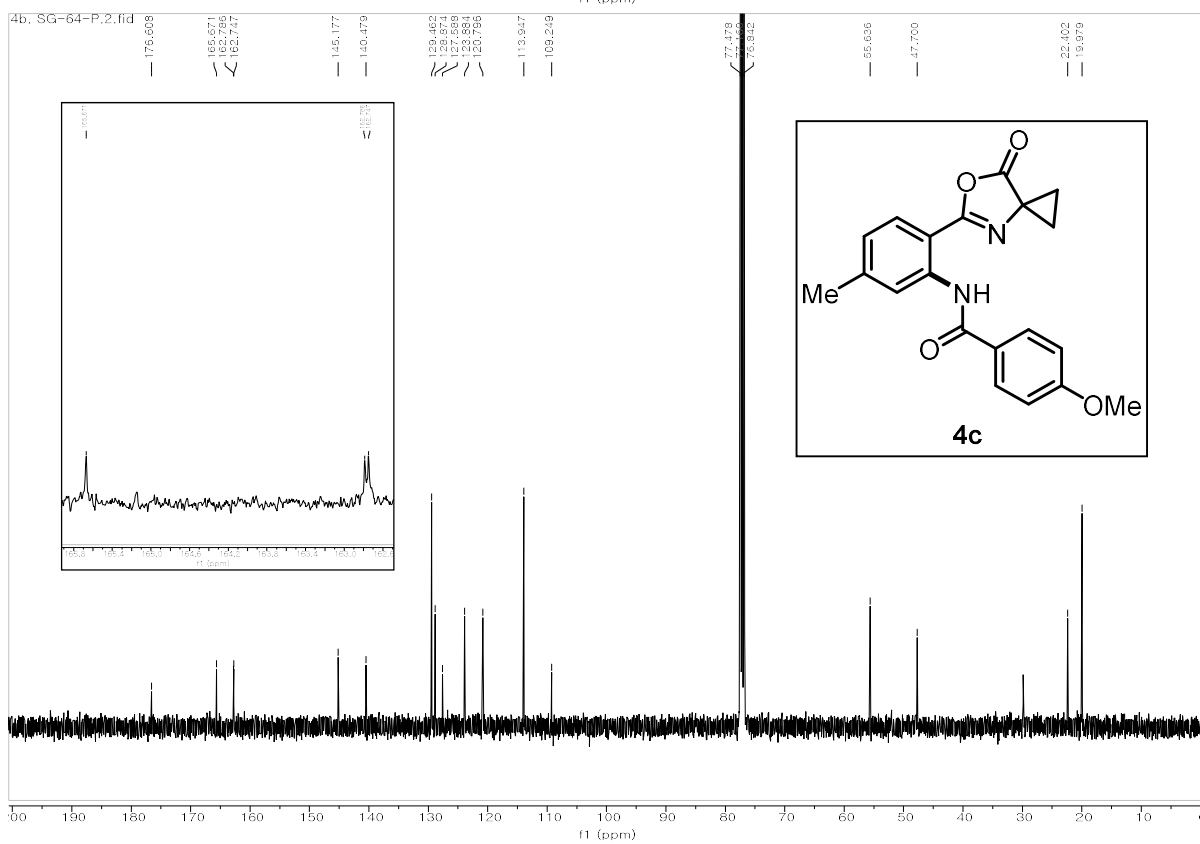

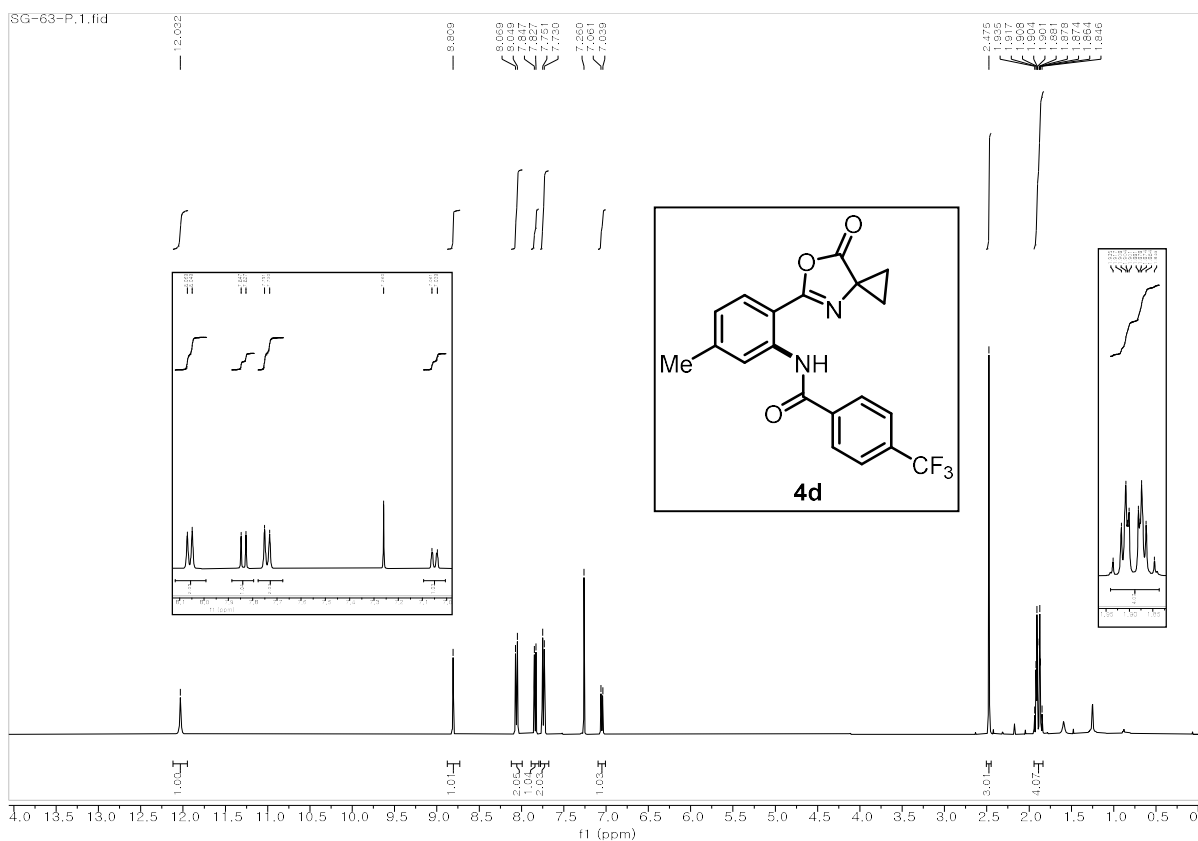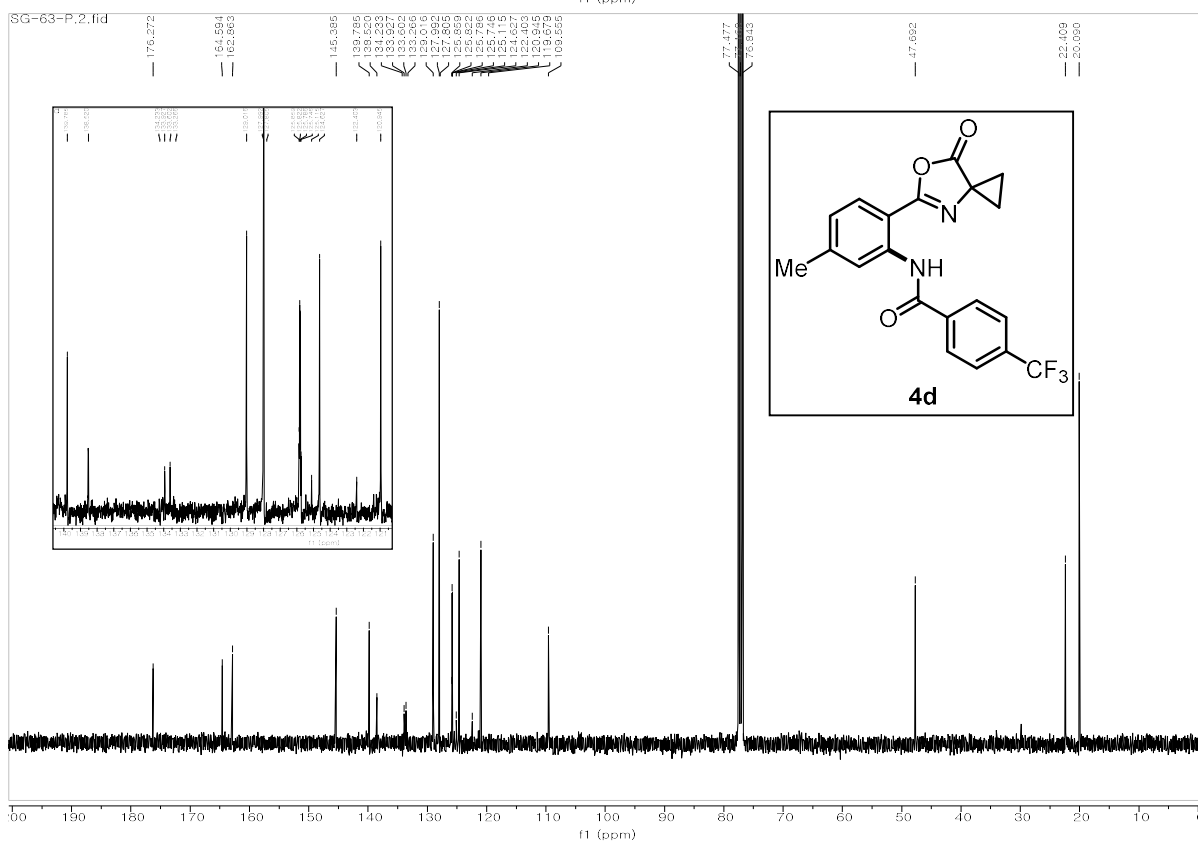

SG68-IP  
single\_pulse

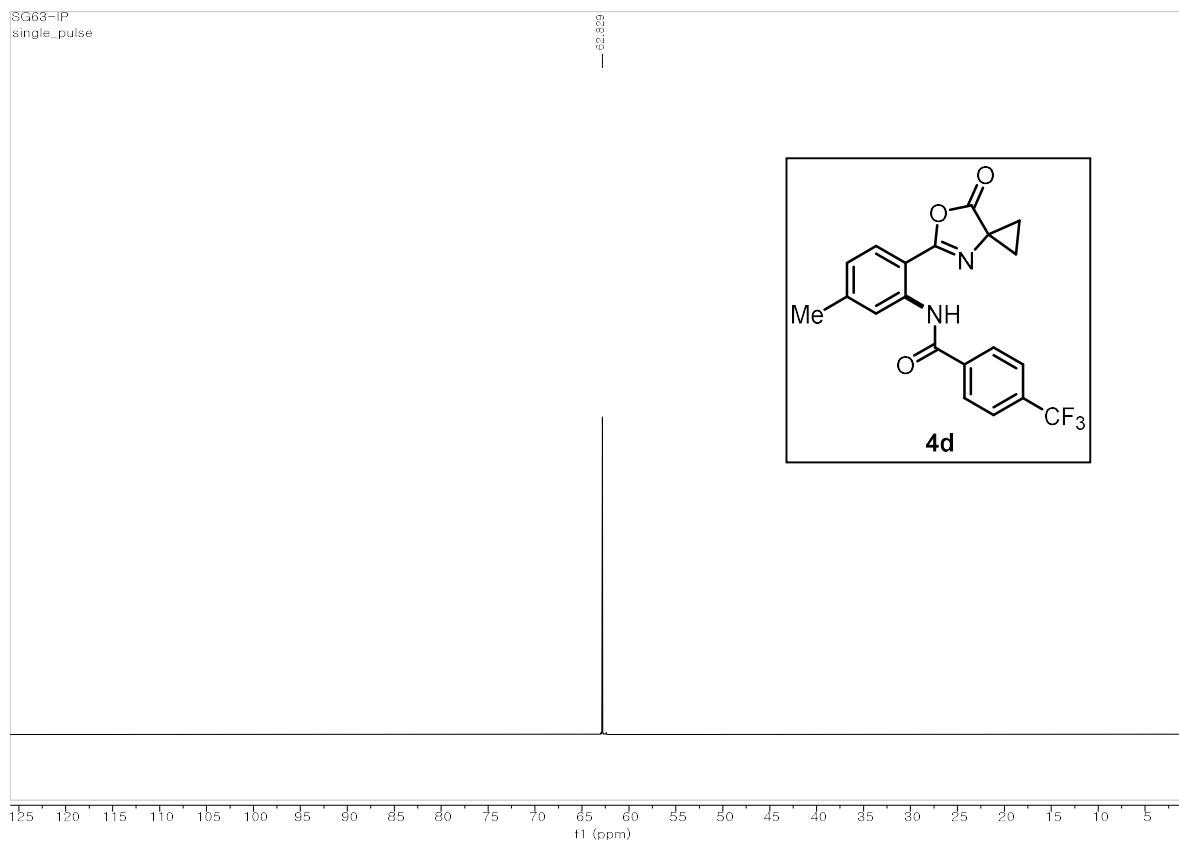



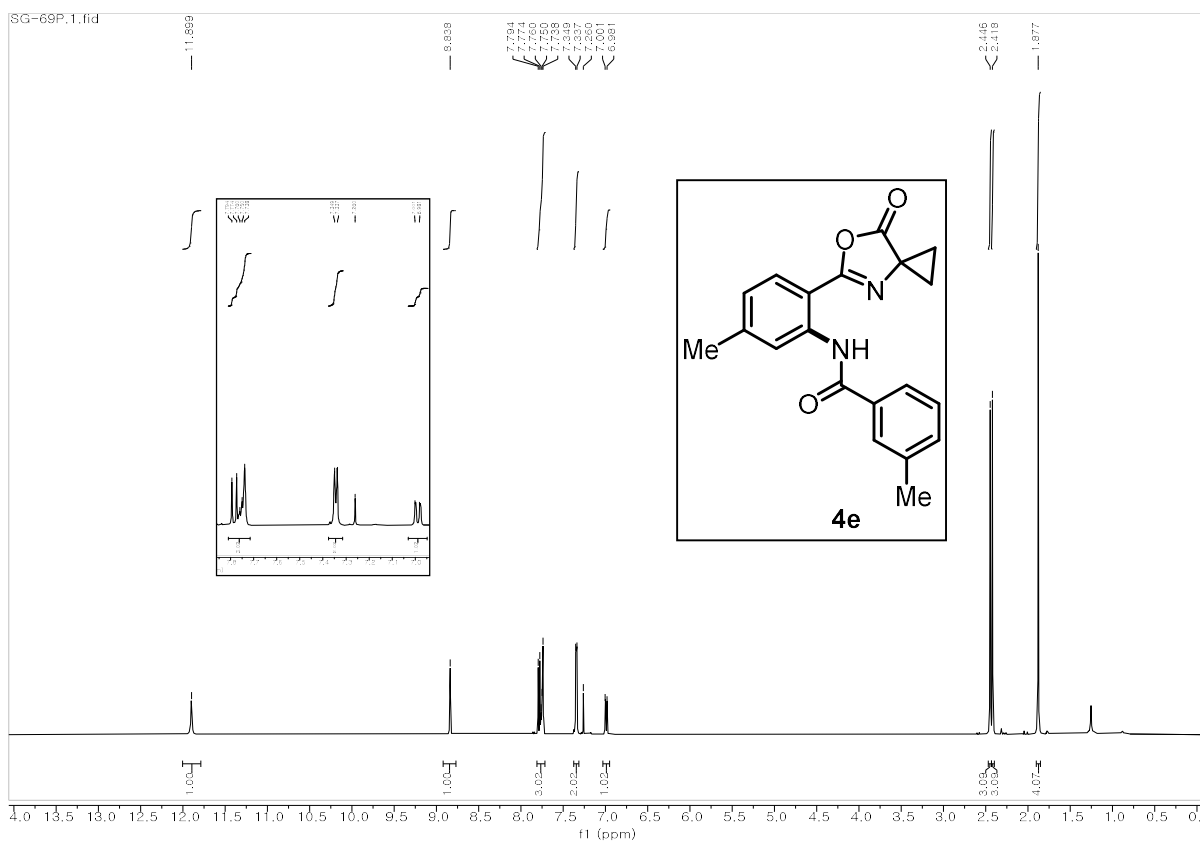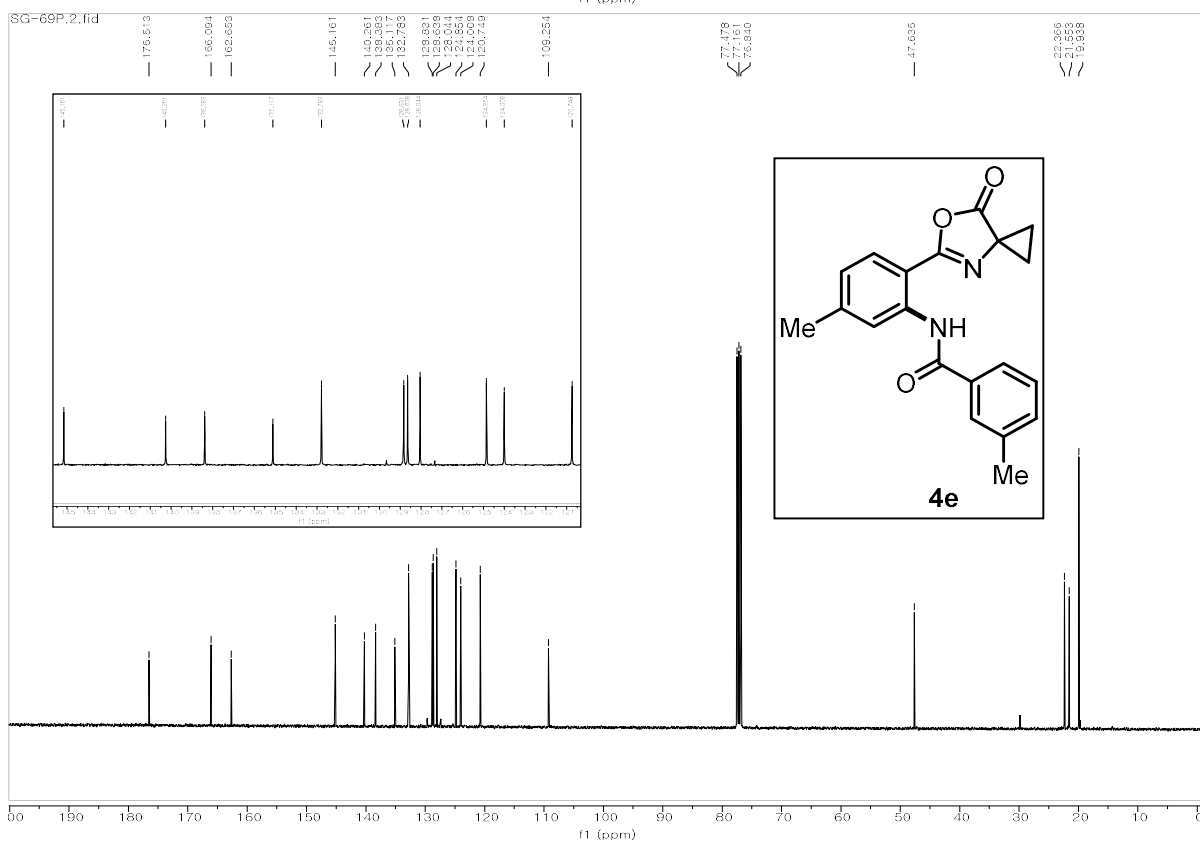

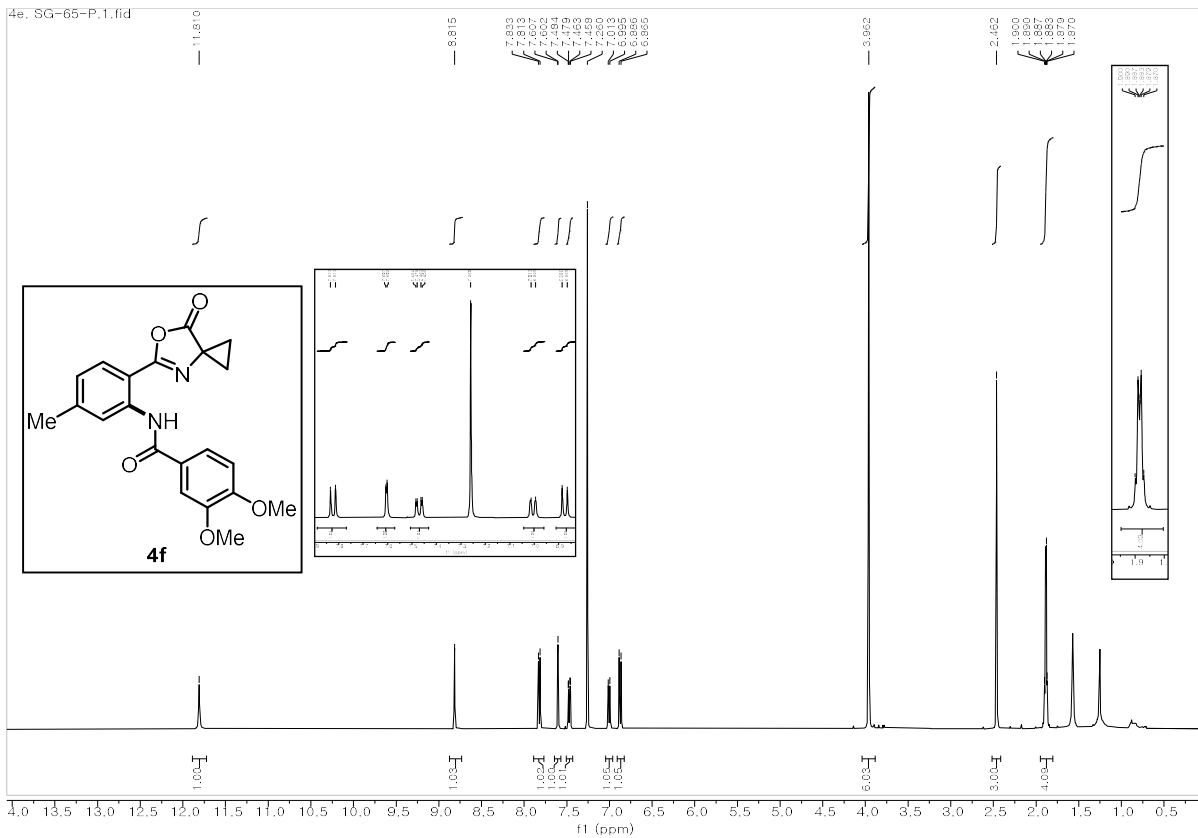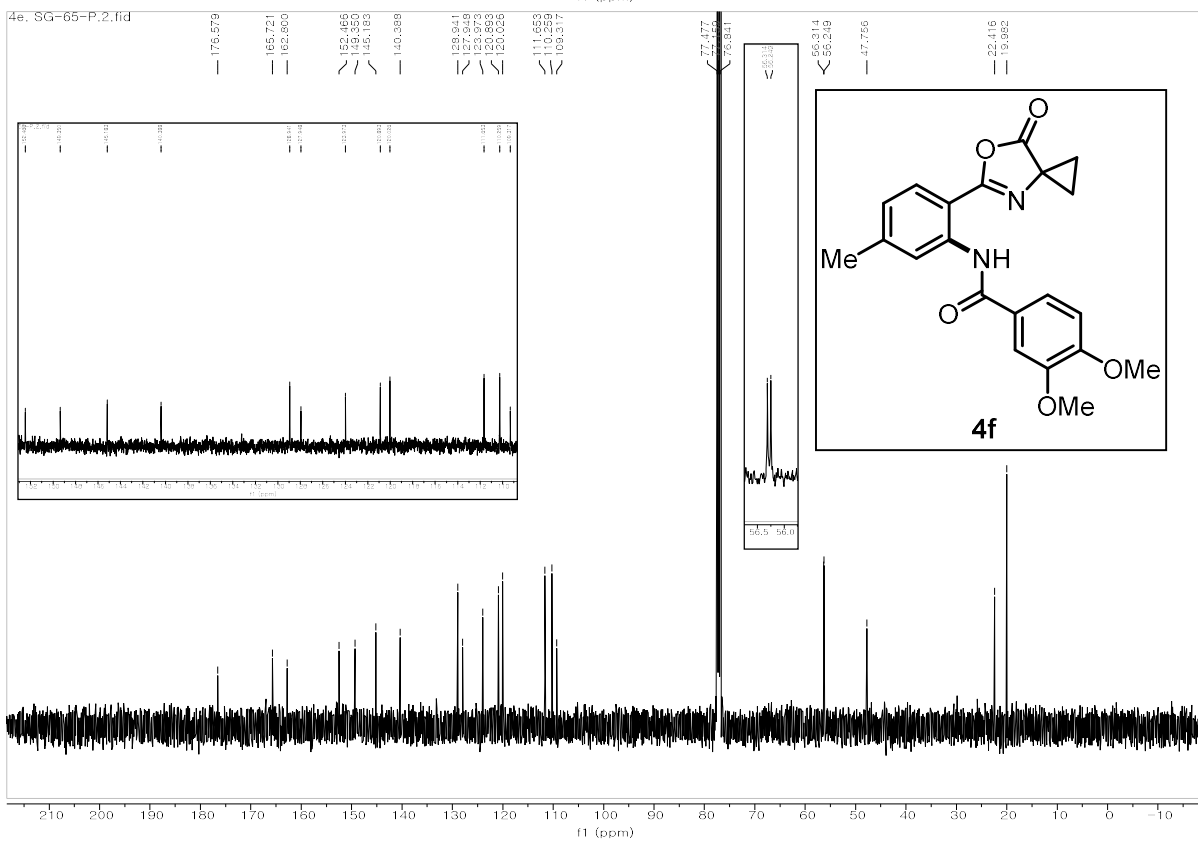

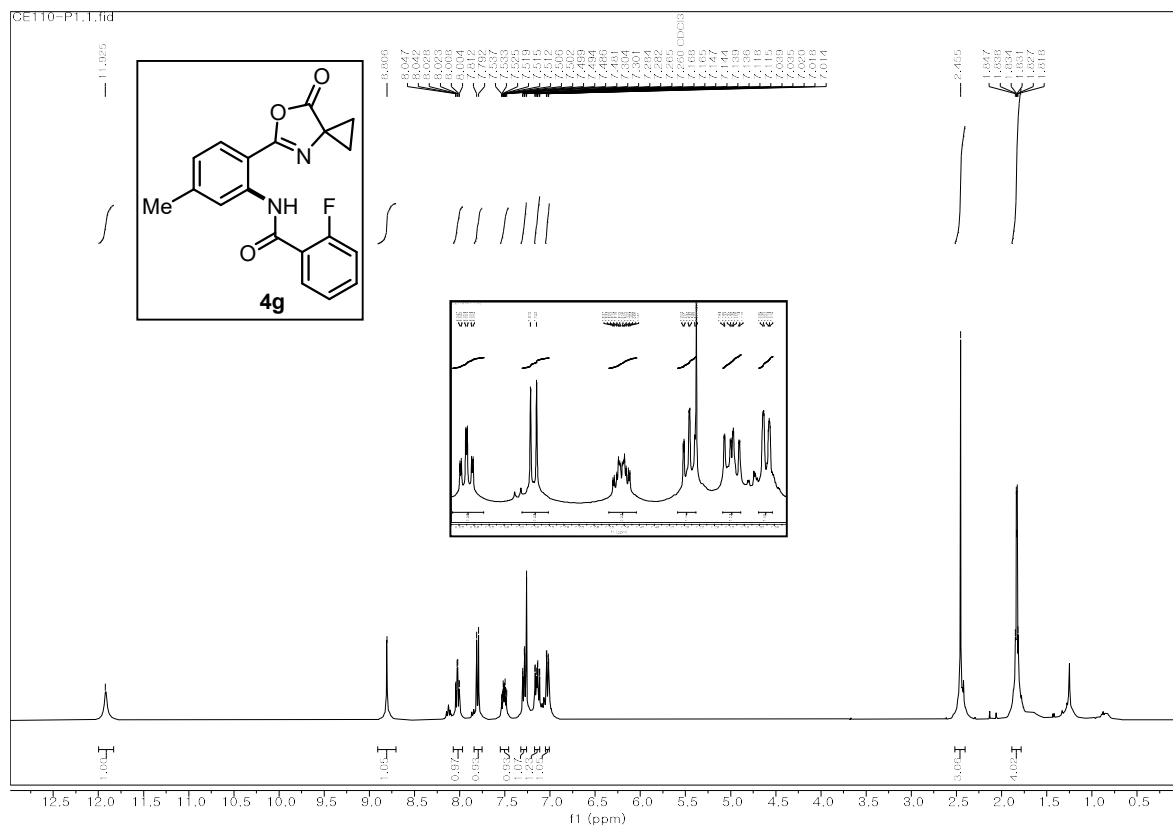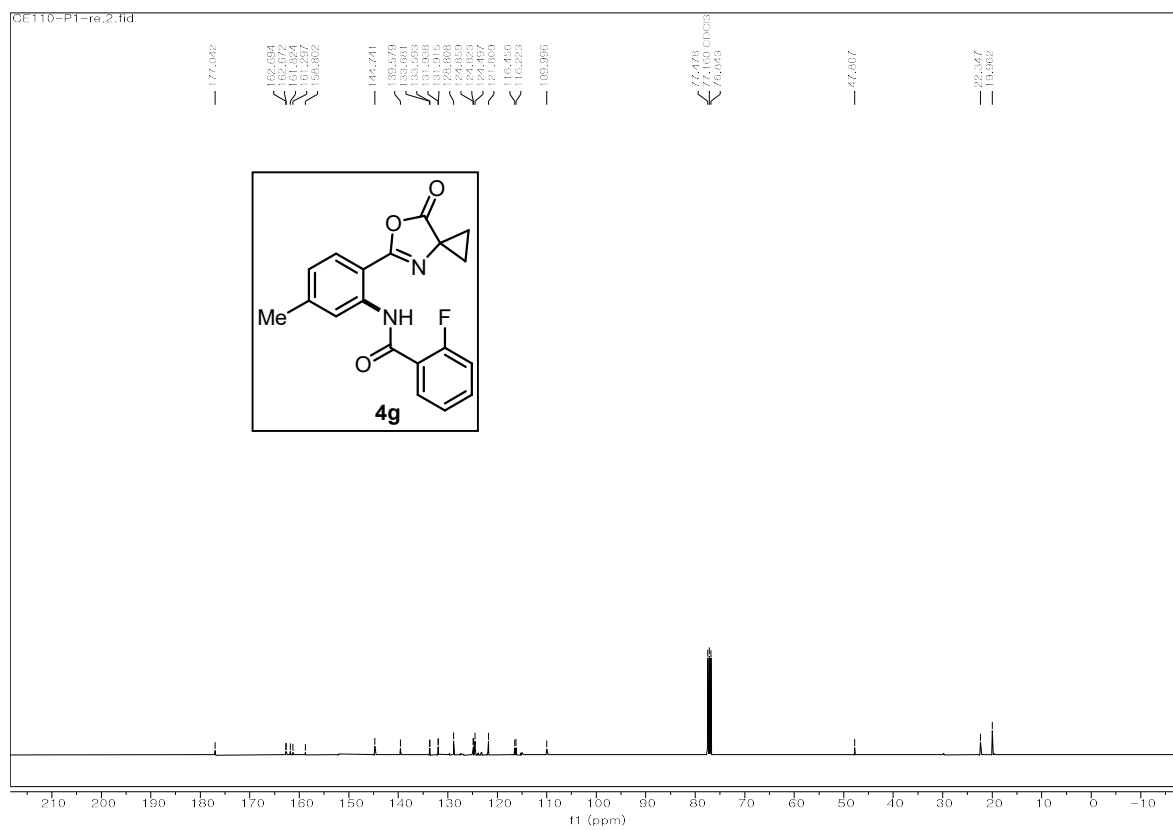

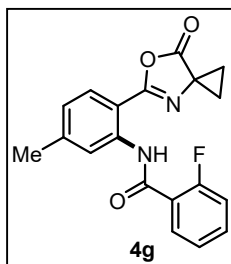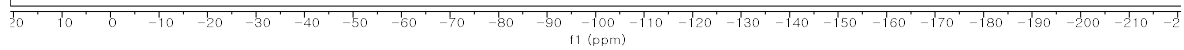

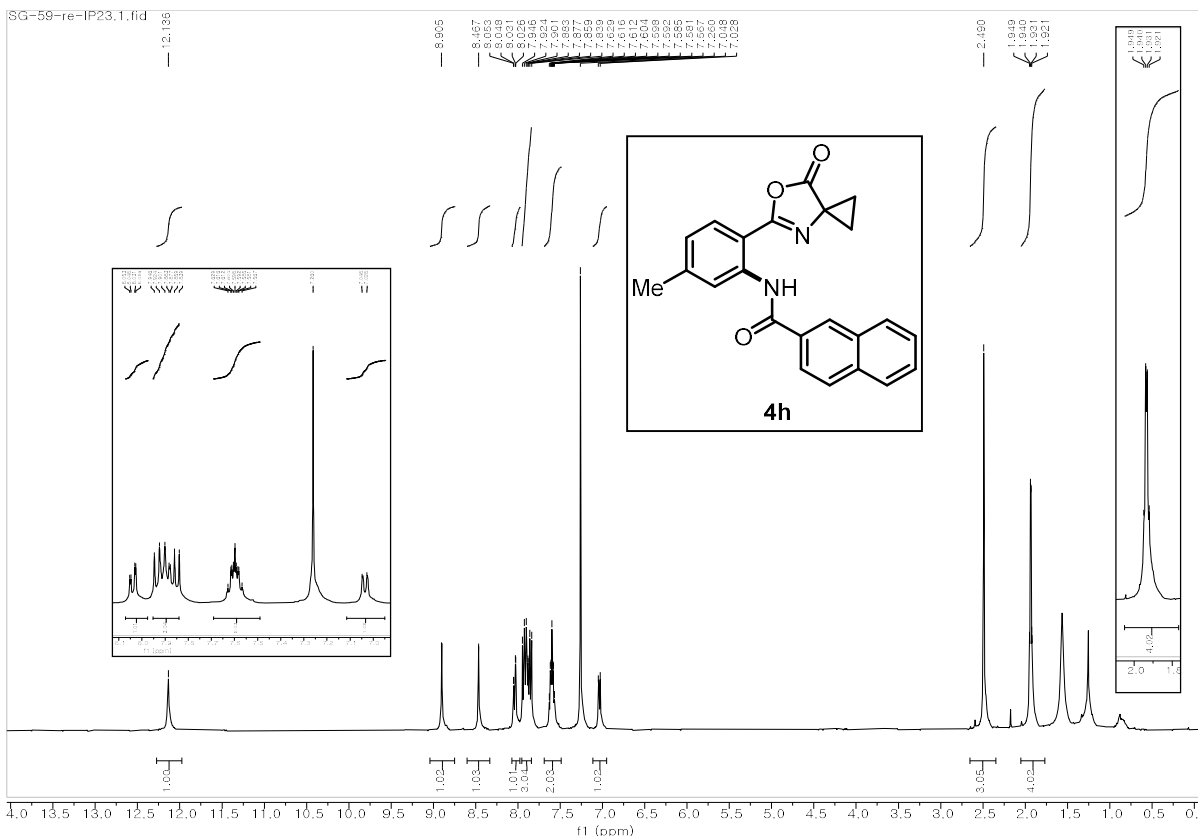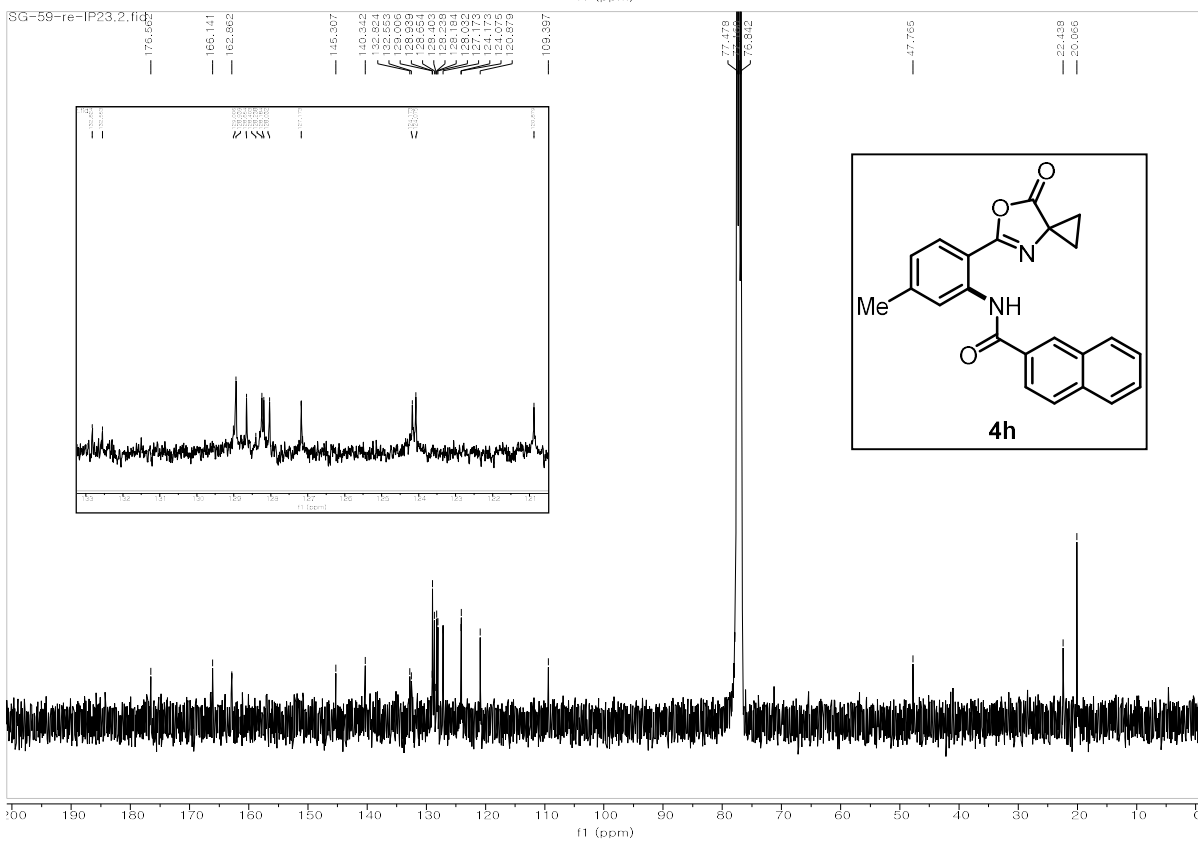

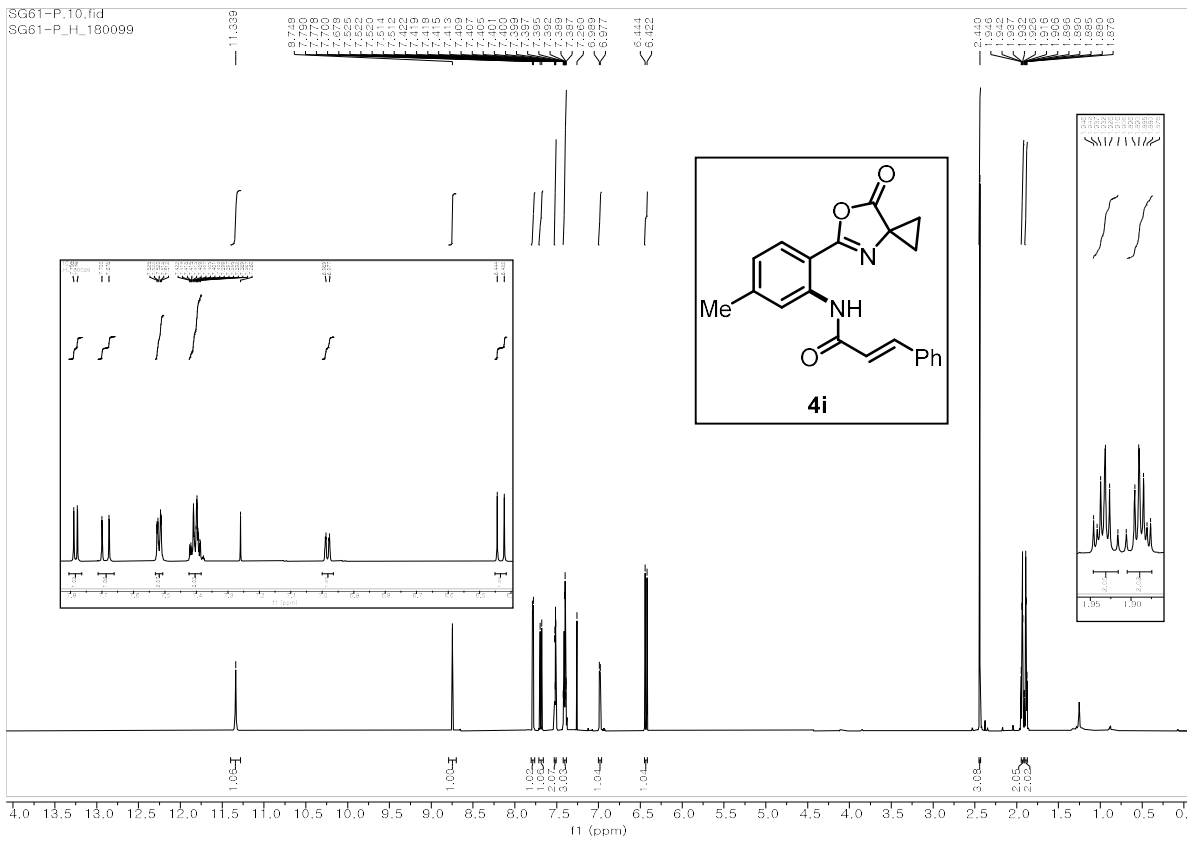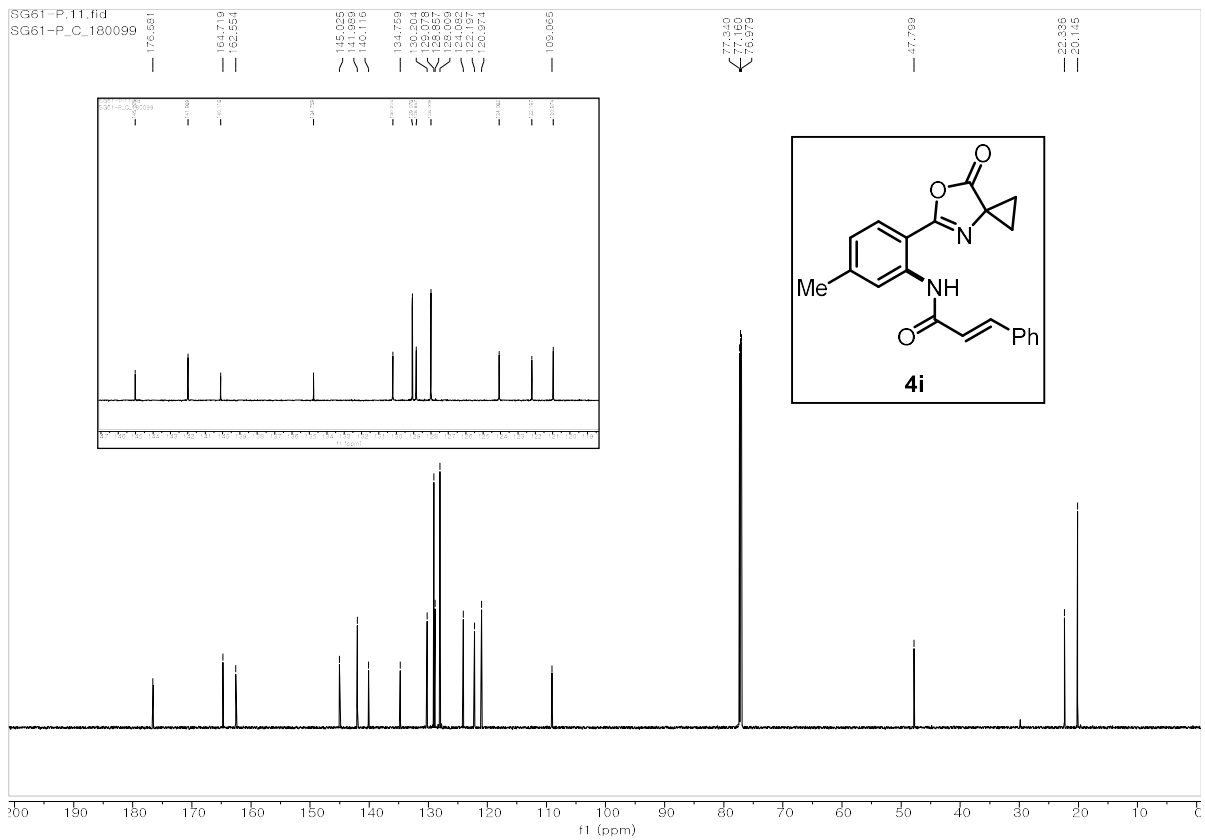

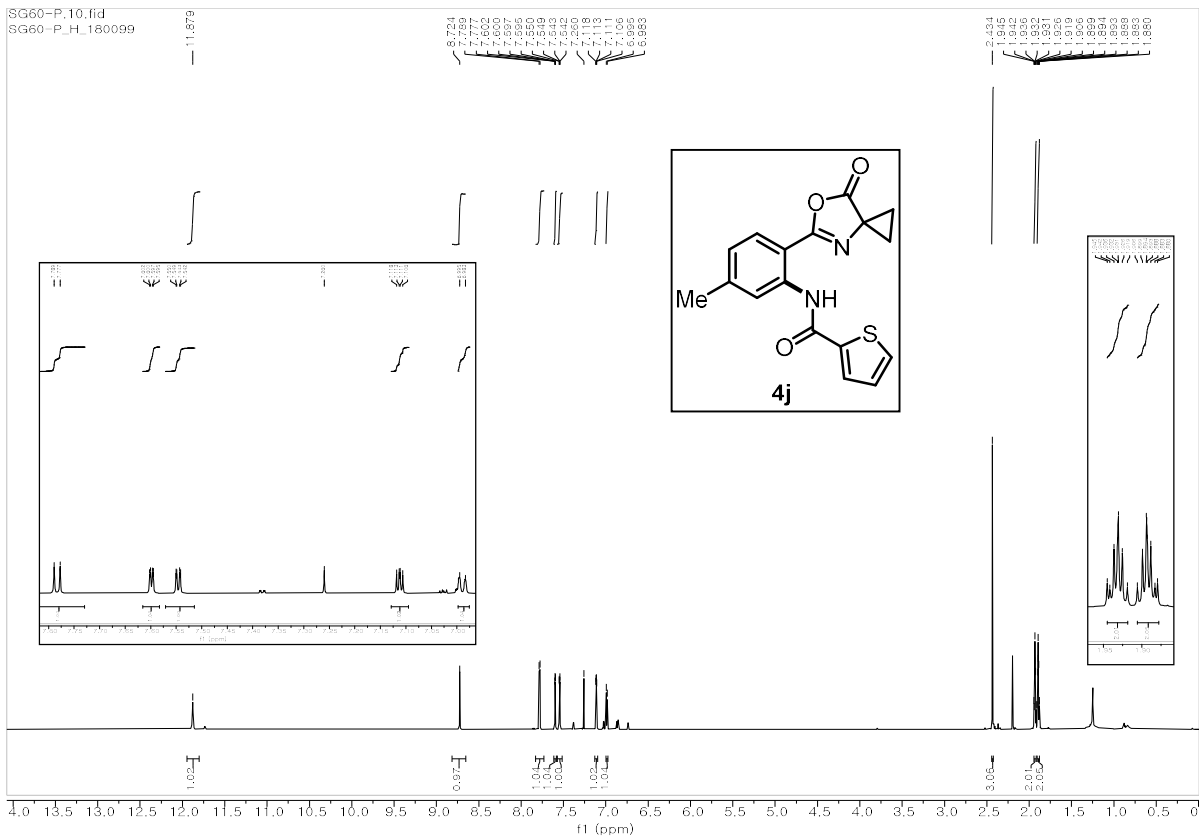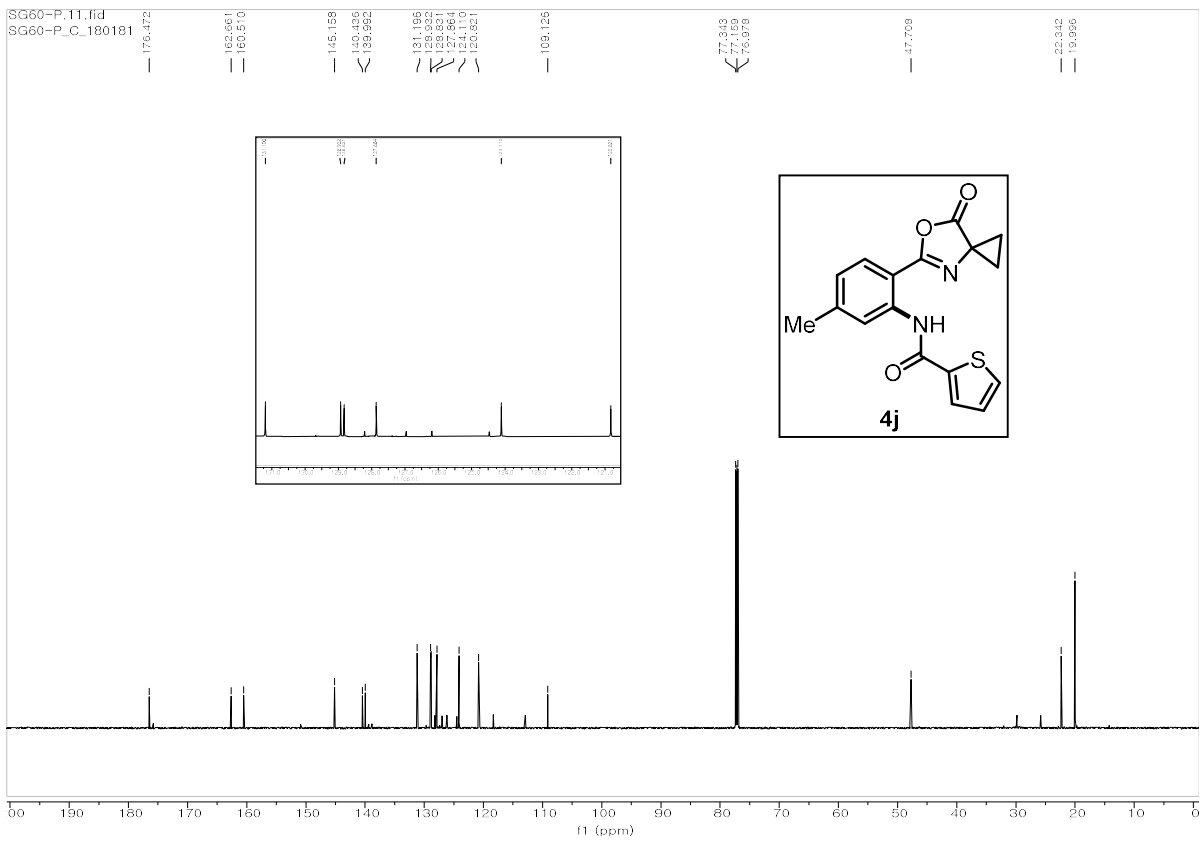

4j. CE43-P\_400MHz.1.fid

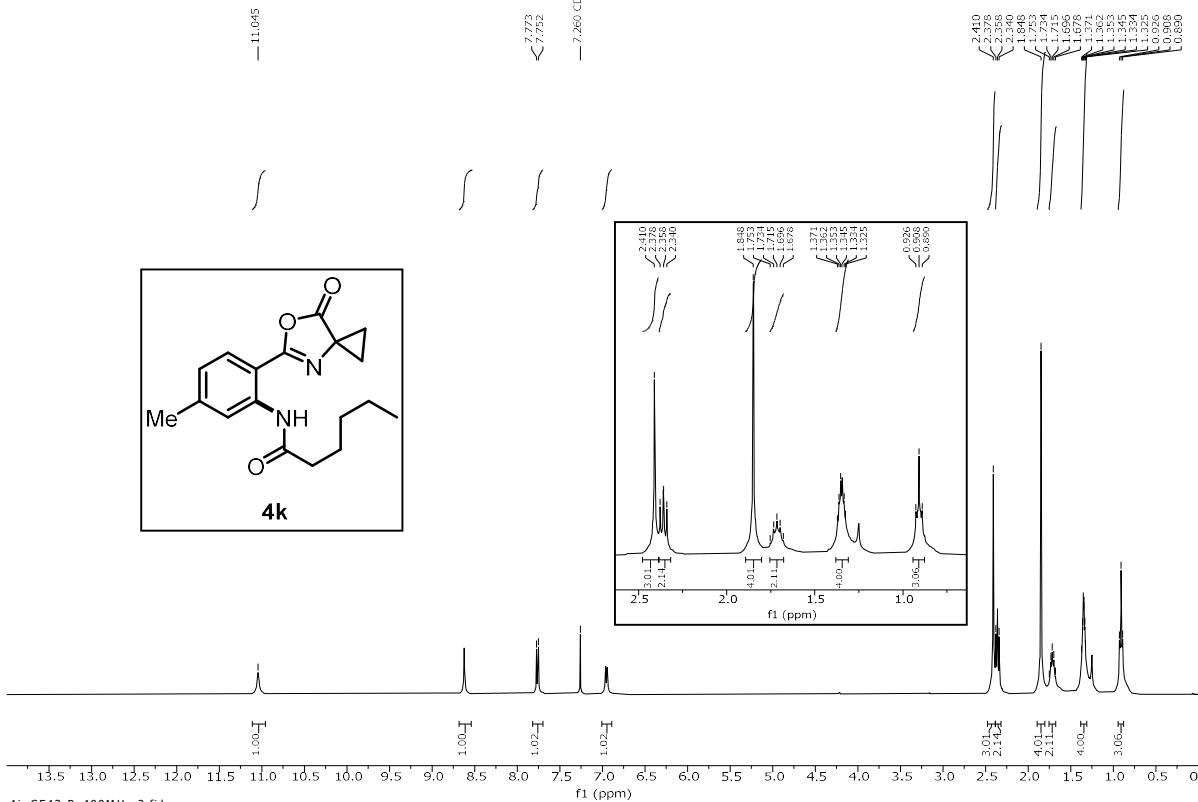

4j. CE43-P\_400MHz.2.fid

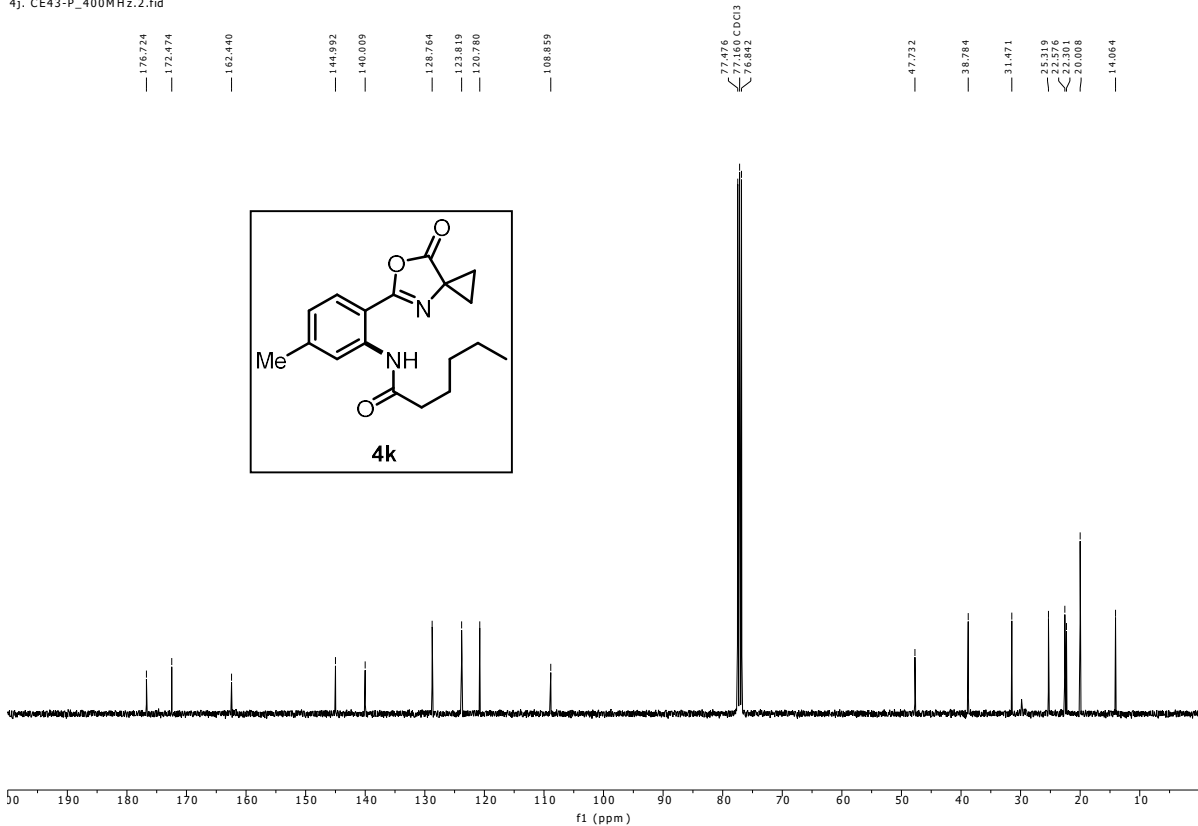



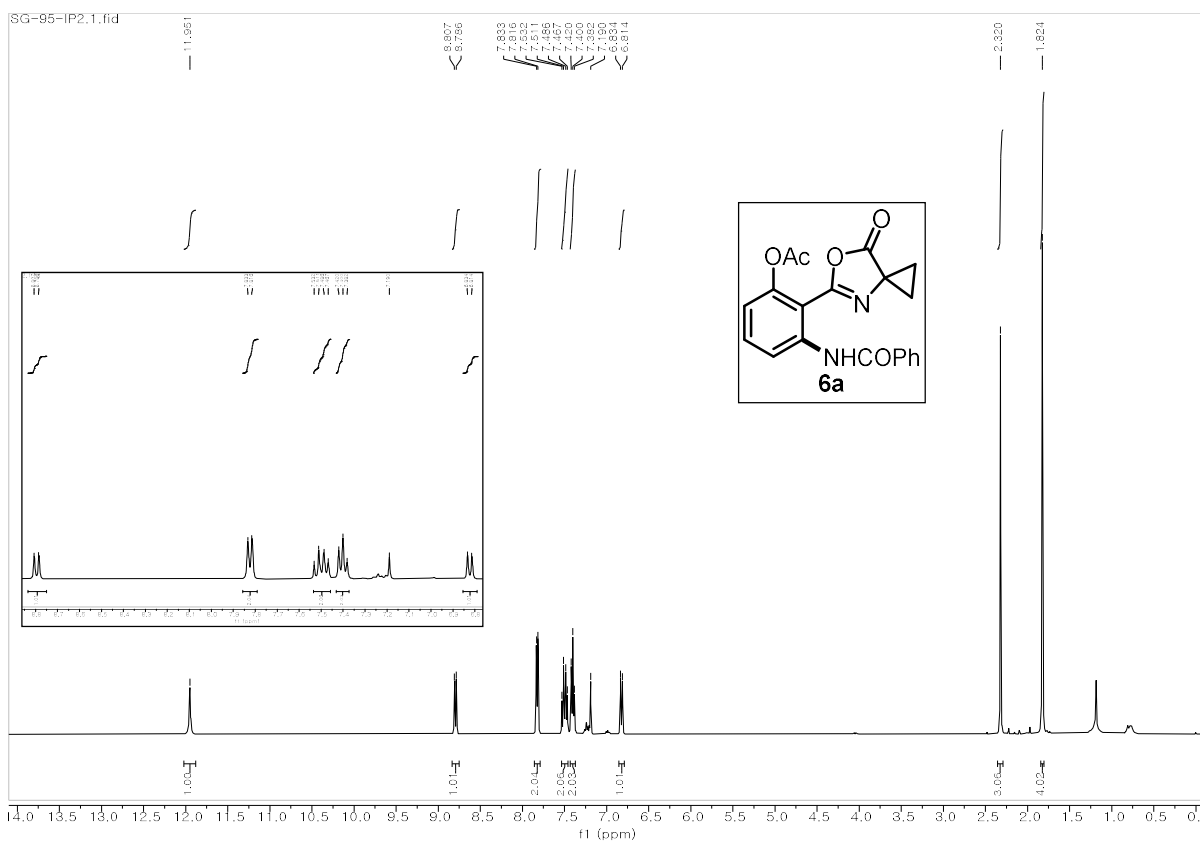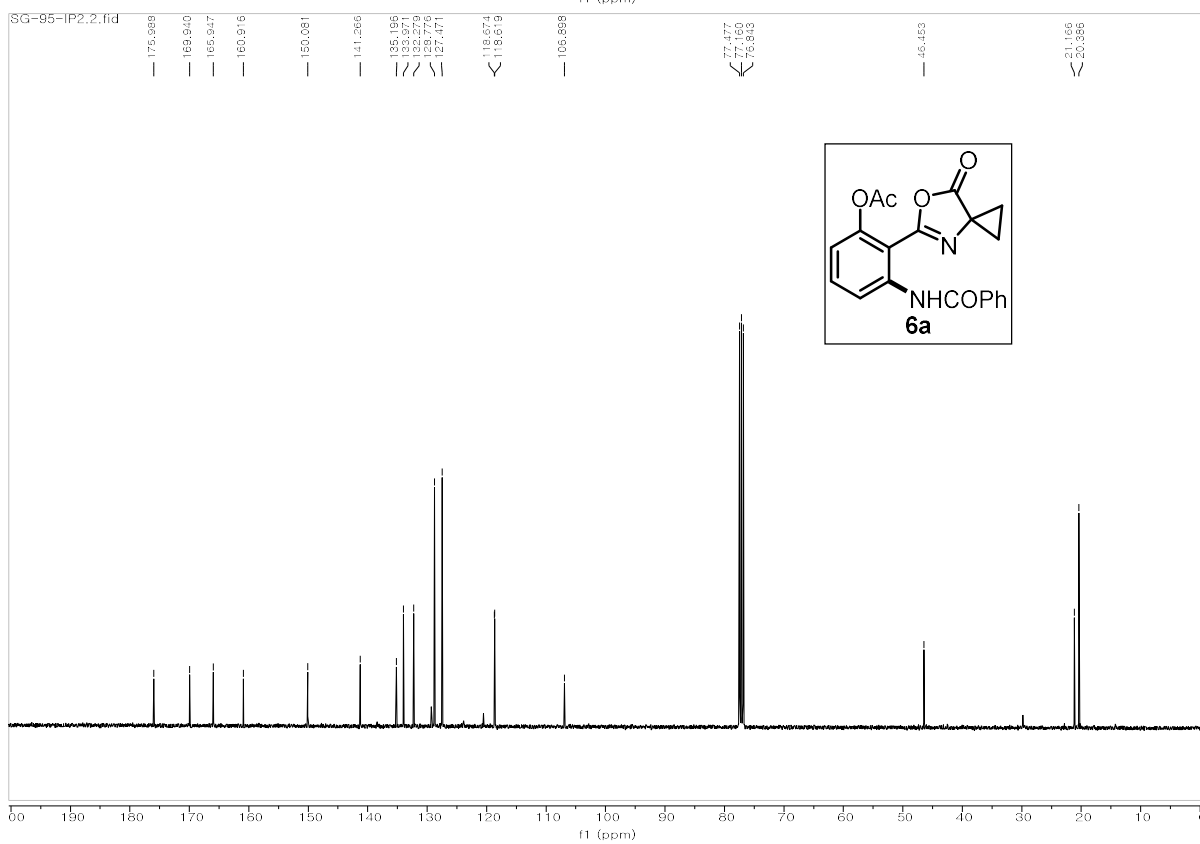



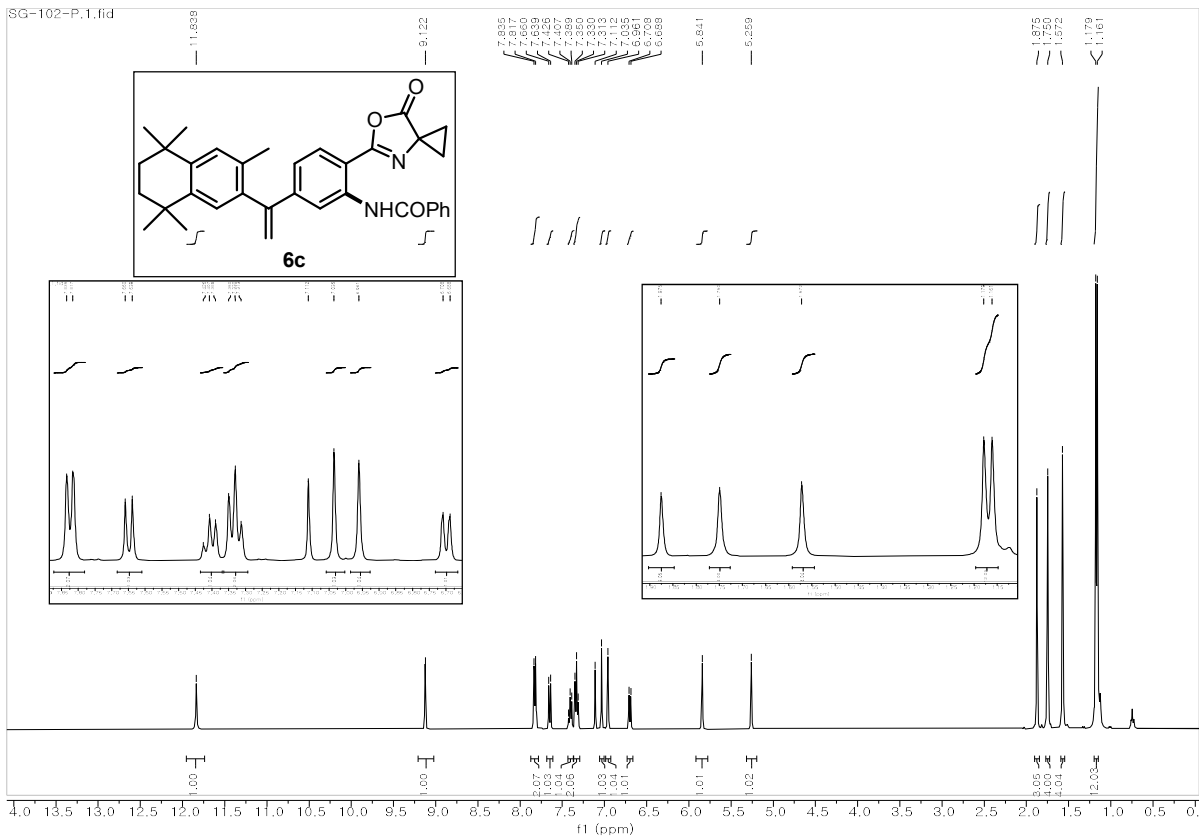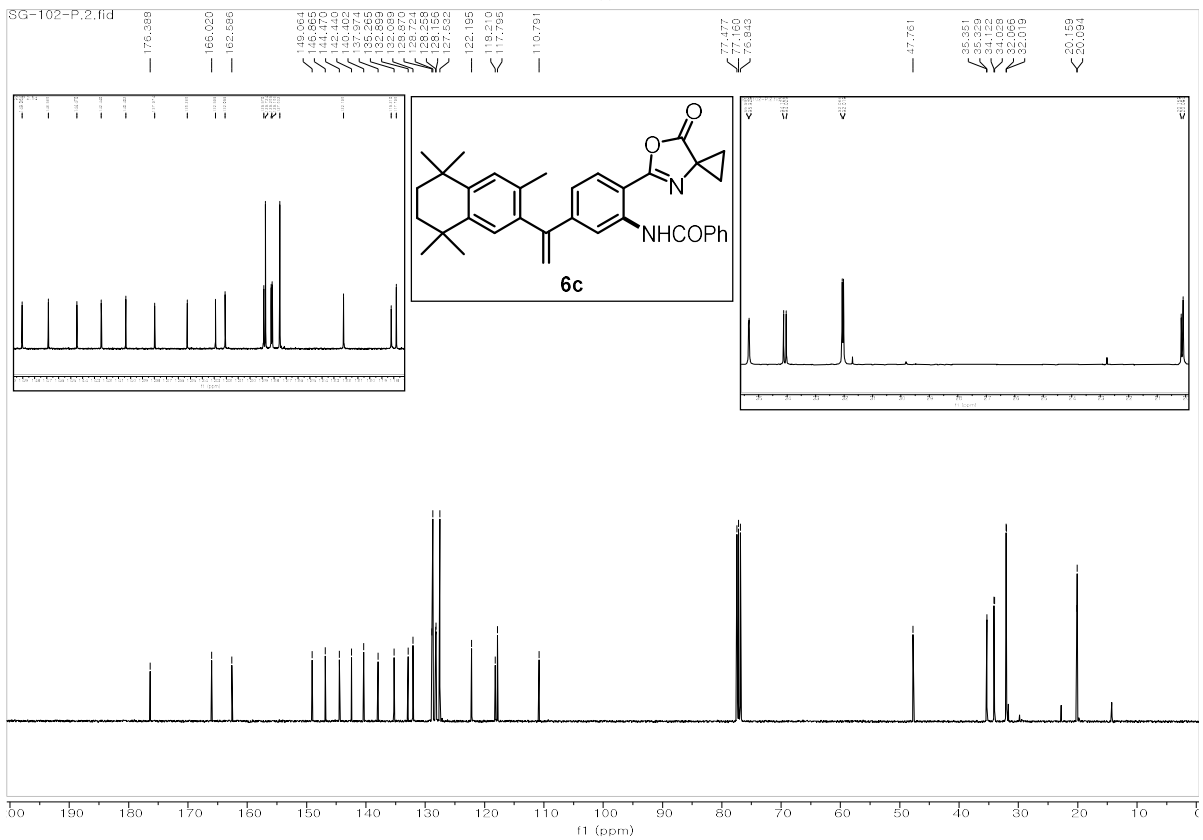







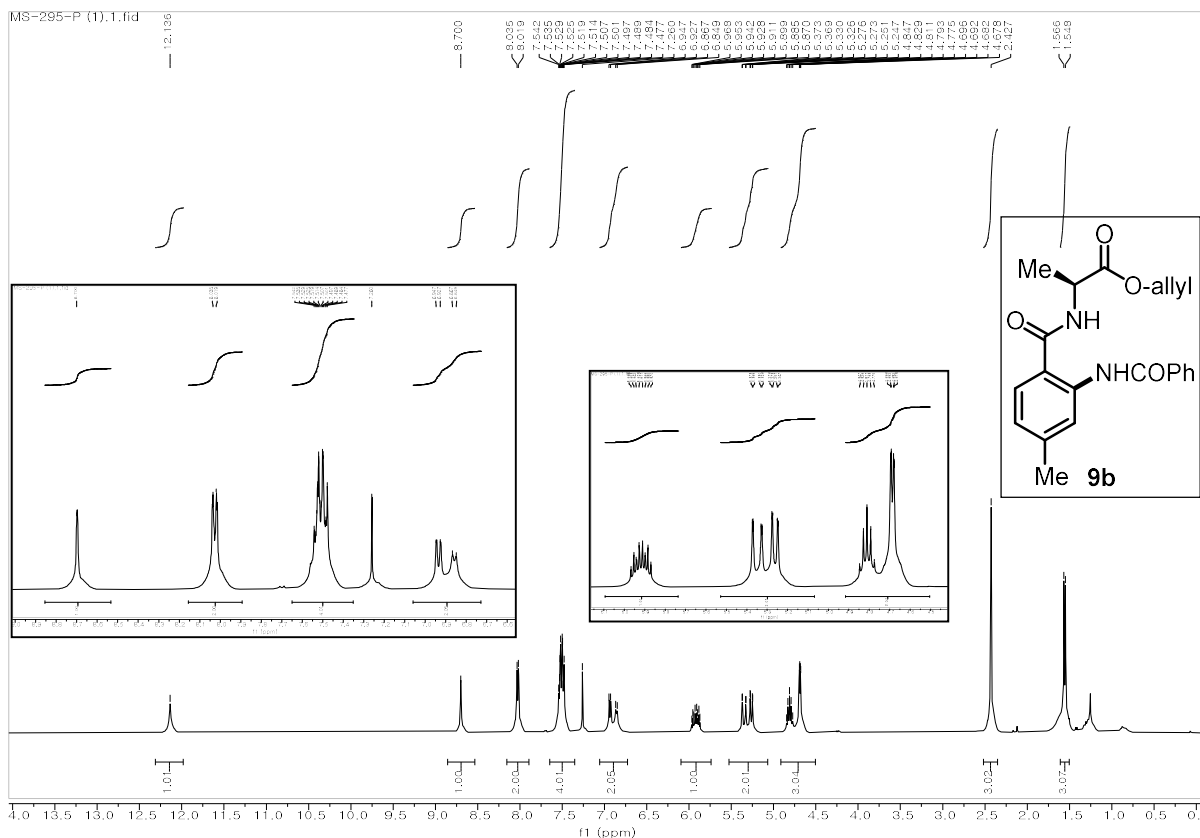

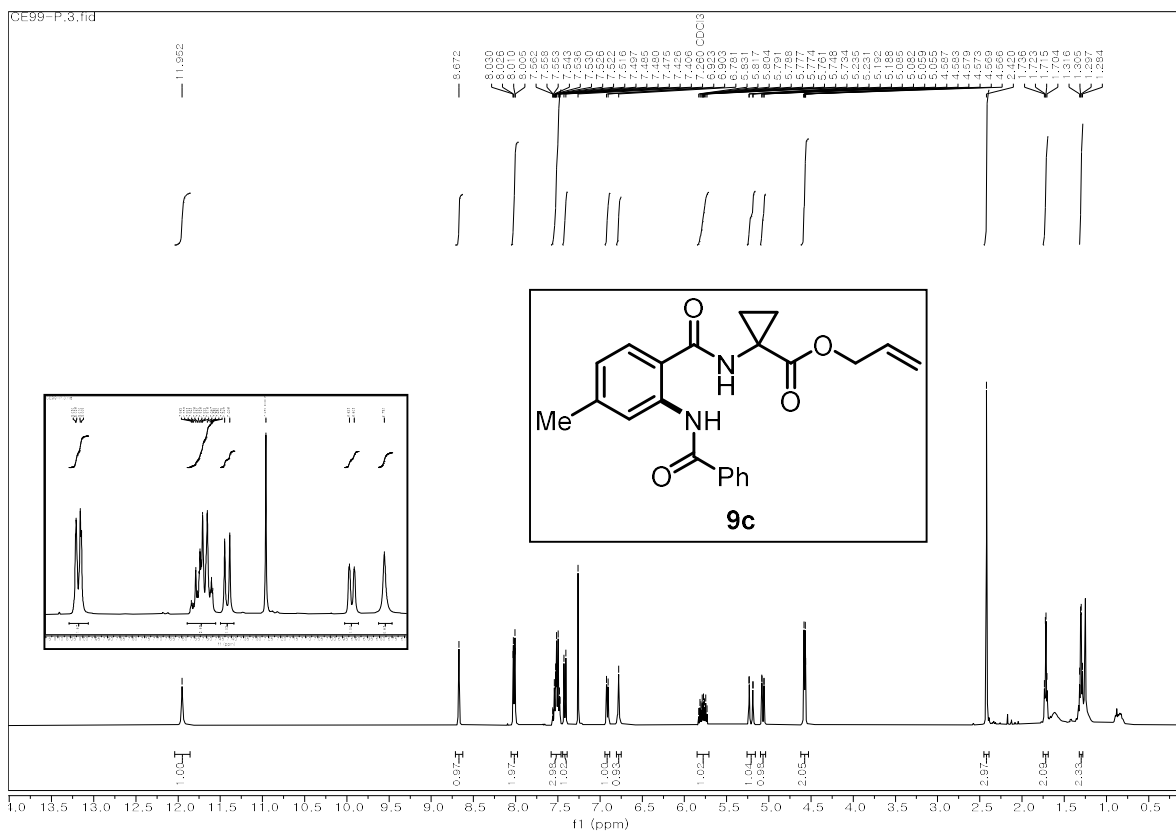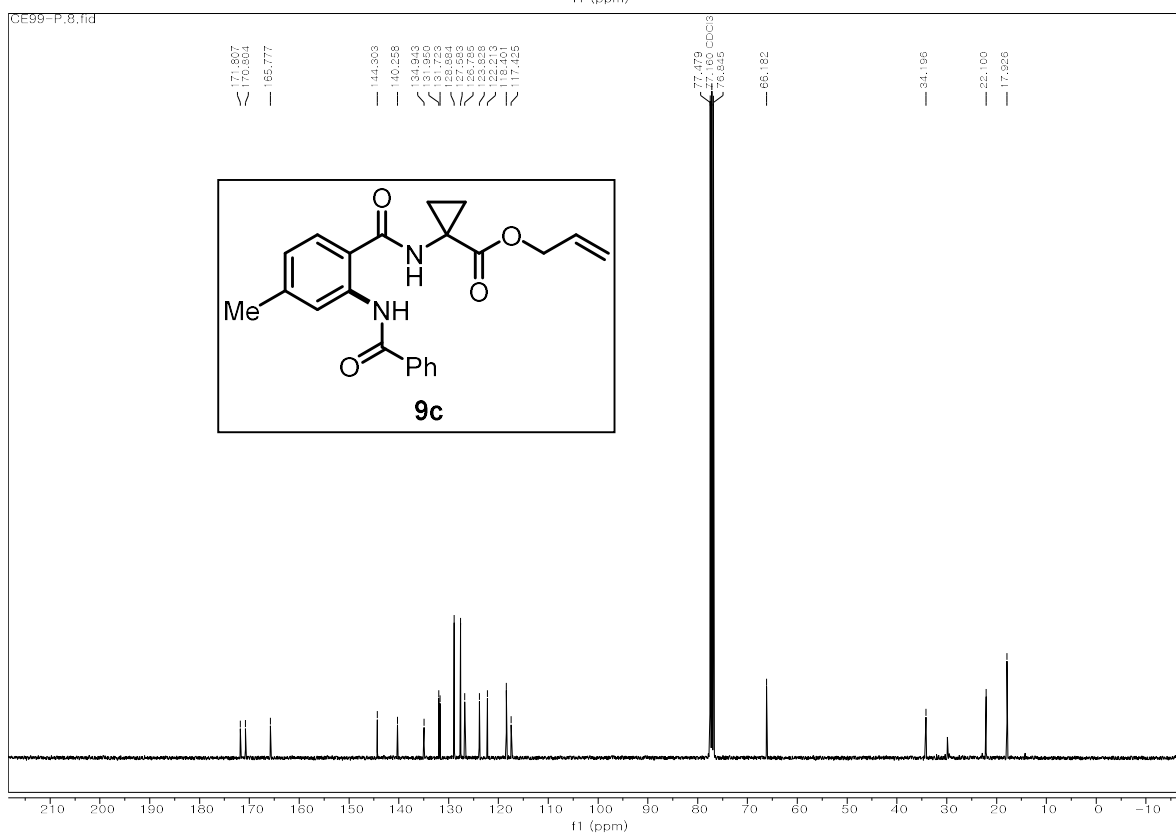



SG-93P.12.fid  
SG-93P\_H\_182737

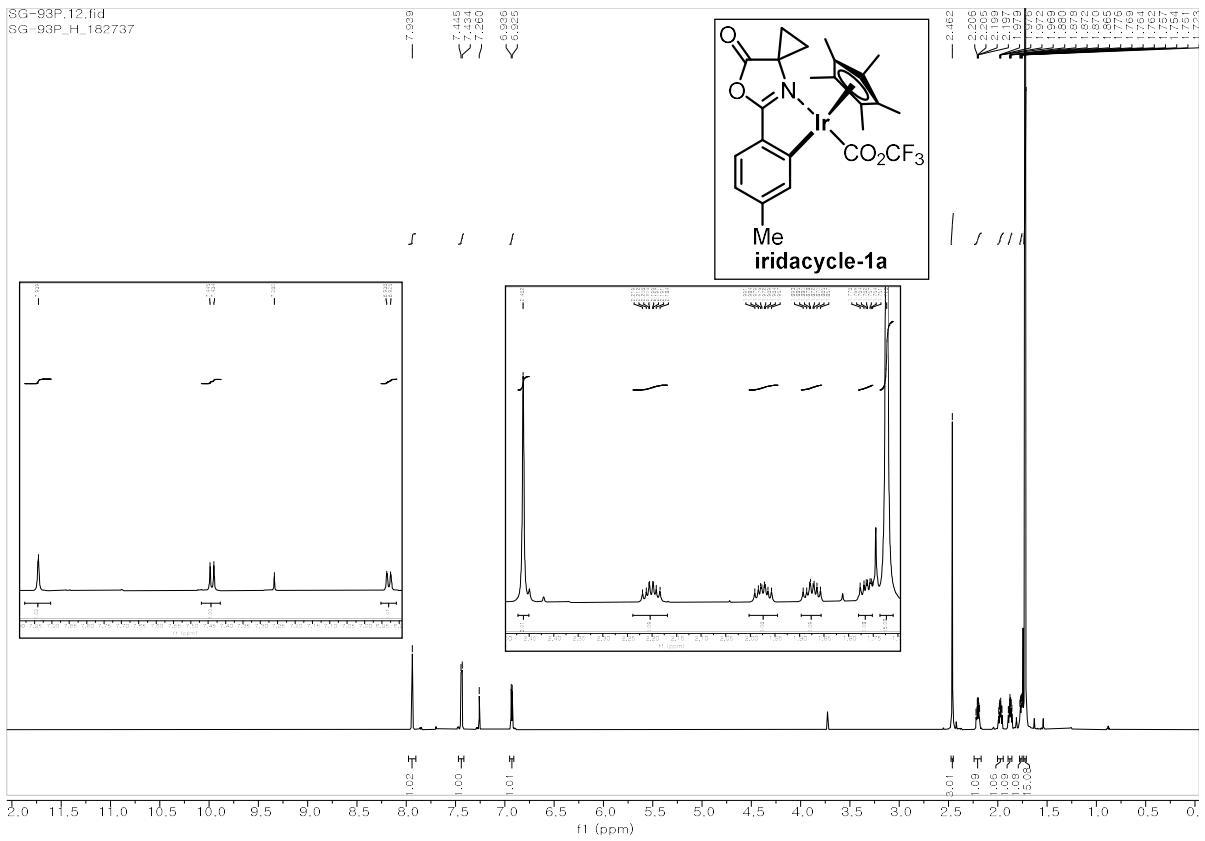

SG-93P.13.fid  
SG-93P\_C\_182733

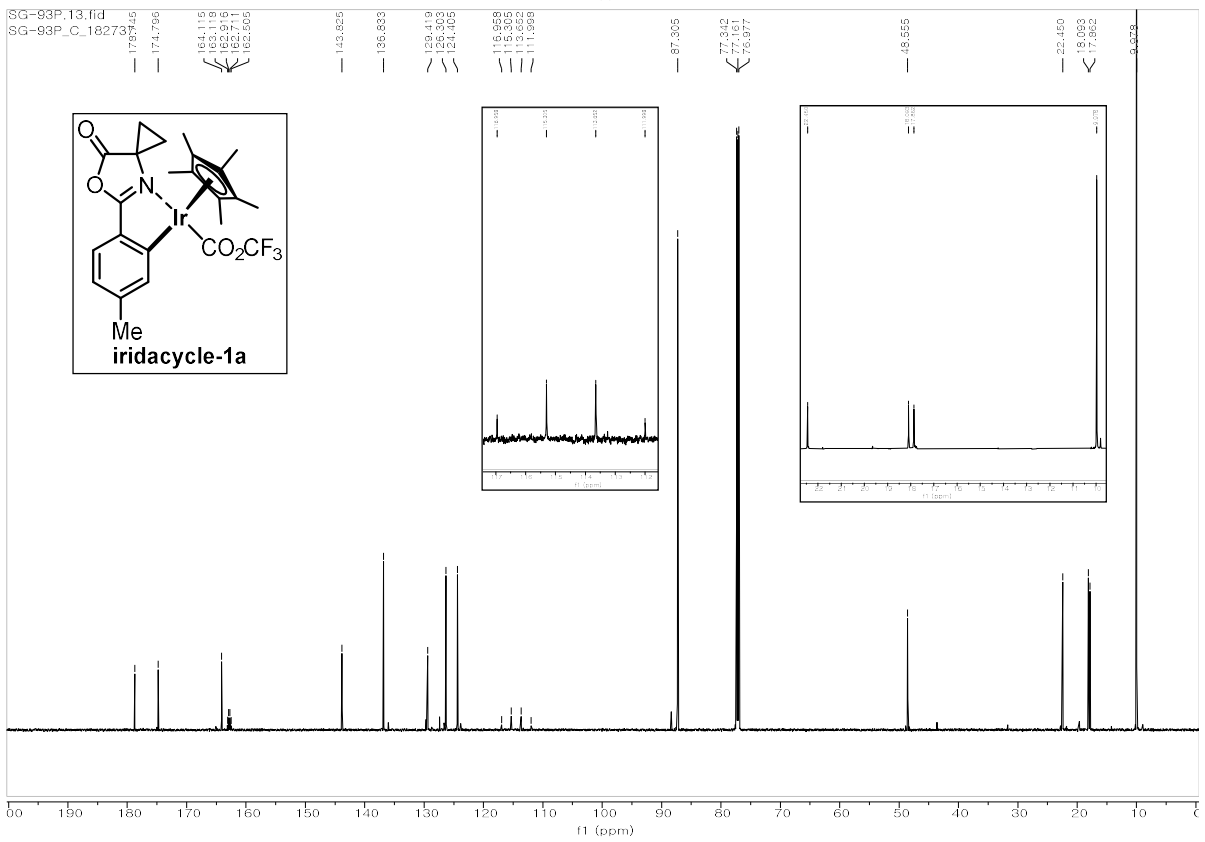

SG-93p  
single\_pulse

74.853

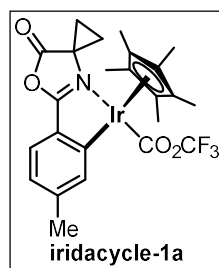

140 130 120 110 100 90 80 70 60 50 40 30 20 10 0 -10 -20 -30 -40 -50  
f1 (ppm)

# HRMS data of all compounds

|                                                            |      |                |      |                          |  |         |
|------------------------------------------------------------|------|----------------|------|--------------------------|--|---------|
| [ Elemental Composition ]                                  |      |                |      | Date : 21-Jan-2022 14:34 |  | Page: 1 |
| Data : 1-MS224-P-001                                       |      |                |      |                          |  | 1a      |
| Sample: SKKU Univ. Prof. Kim                               |      |                |      |                          |  |         |
| Note : SMLab Mass analysis                                 |      |                |      |                          |  |         |
| Inlet : Direct                                             |      |                |      | Ion Mode : EI+           |  |         |
| RT : 2.30 min                                              |      |                |      | Scan#: 70                |  |         |
| Elements : C 13/0, H 12/0, O 3/0, N 1/0                    |      |                |      |                          |  |         |
| Mass Tolerance : 1000ppm, 3mmu if m/z < 3, 5mmu if m/z > 5 |      |                |      |                          |  |         |
| Unsaturation (U.S.) : -0.5 - 70.0                          |      |                |      |                          |  |         |
| Observed m/z                                               | Int% | Err[ppm / mmu] | U.S. | Composition              |  |         |
| 201.0787                                                   | 94.6 | -1.4 / -0.3    | 8.0  | C 12 H 11 O 2 N          |  |         |

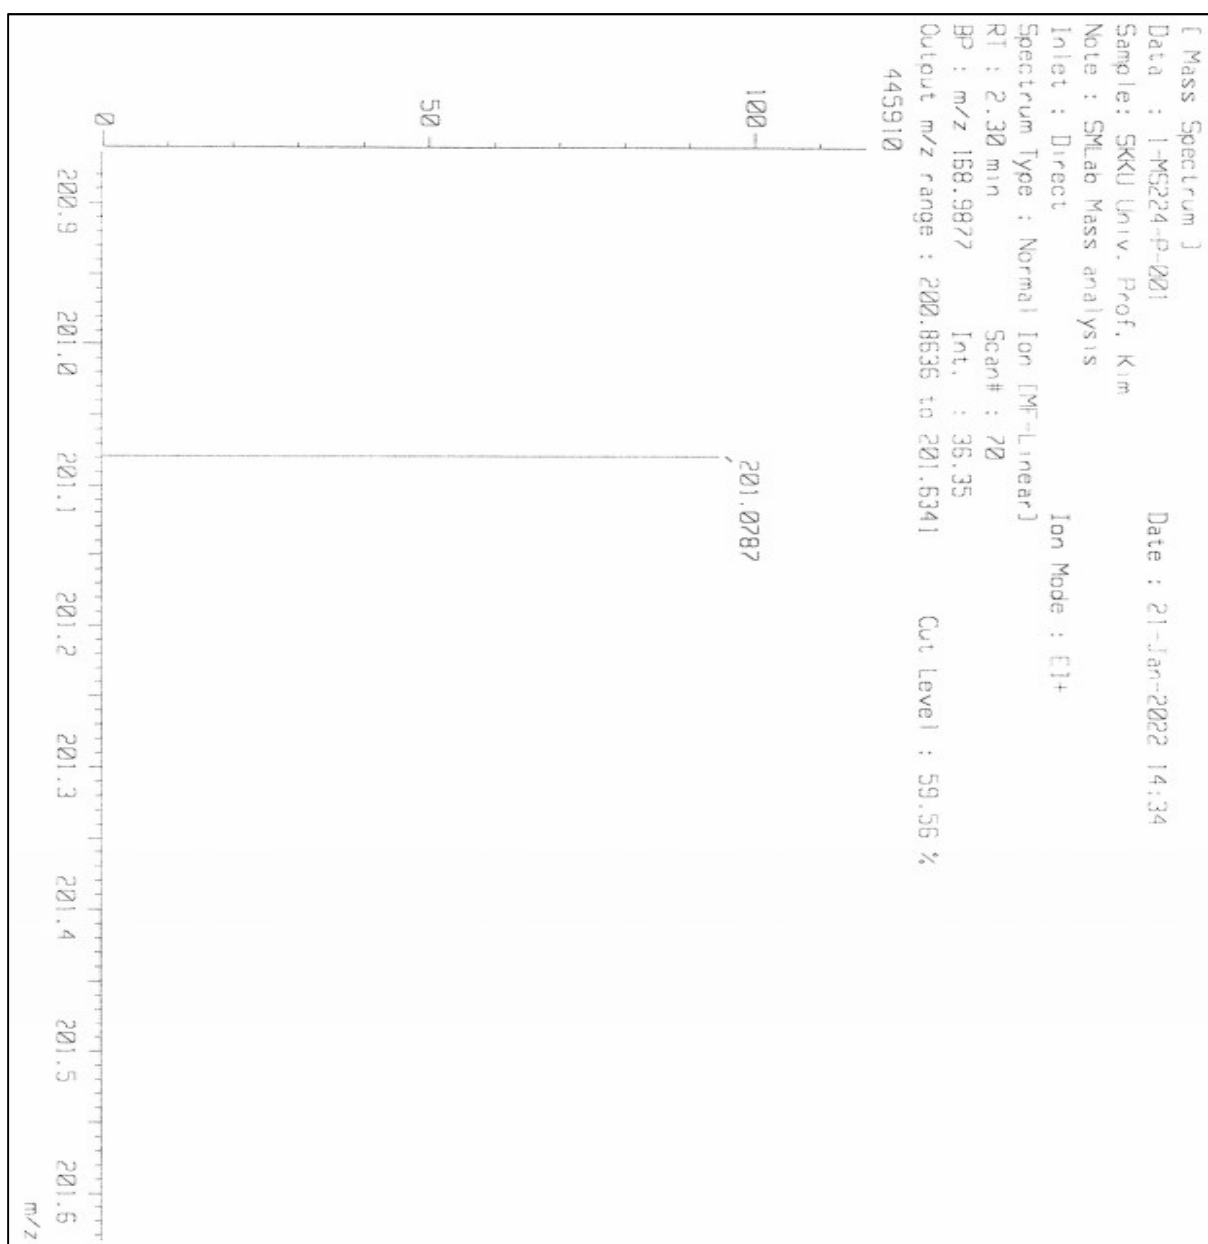

[ Elemental Composition ]

Data : HR-MS235-P Date : 14-Feb-2022 12:42  
 Sample: SKKU Univ. Prof. Kim  
 Note : SMLab Mass analysis  
 Inlet : Direct Ion Mode : EI+  
 RT : 3.04 min Scan#: 92  
 Elements : C 15/0, H 12/0, O 2/0, N 1/0, Cl 1/0  
 Mass Tolerance : 1000ppm, 3mmu if m/z < 3, 5mmu if m/z > 5  
 Unsaturation (U.S.) : -0.5 - 70.0

1b

| Observed m/z | Int%  | Err[ppm / mmu] | U.S. | Composition       |
|--------------|-------|----------------|------|-------------------|
| 221.0240     | 100.0 | -1.5 / -0.3    | 8.0  | C 11 H 8 O 2 N Cl |

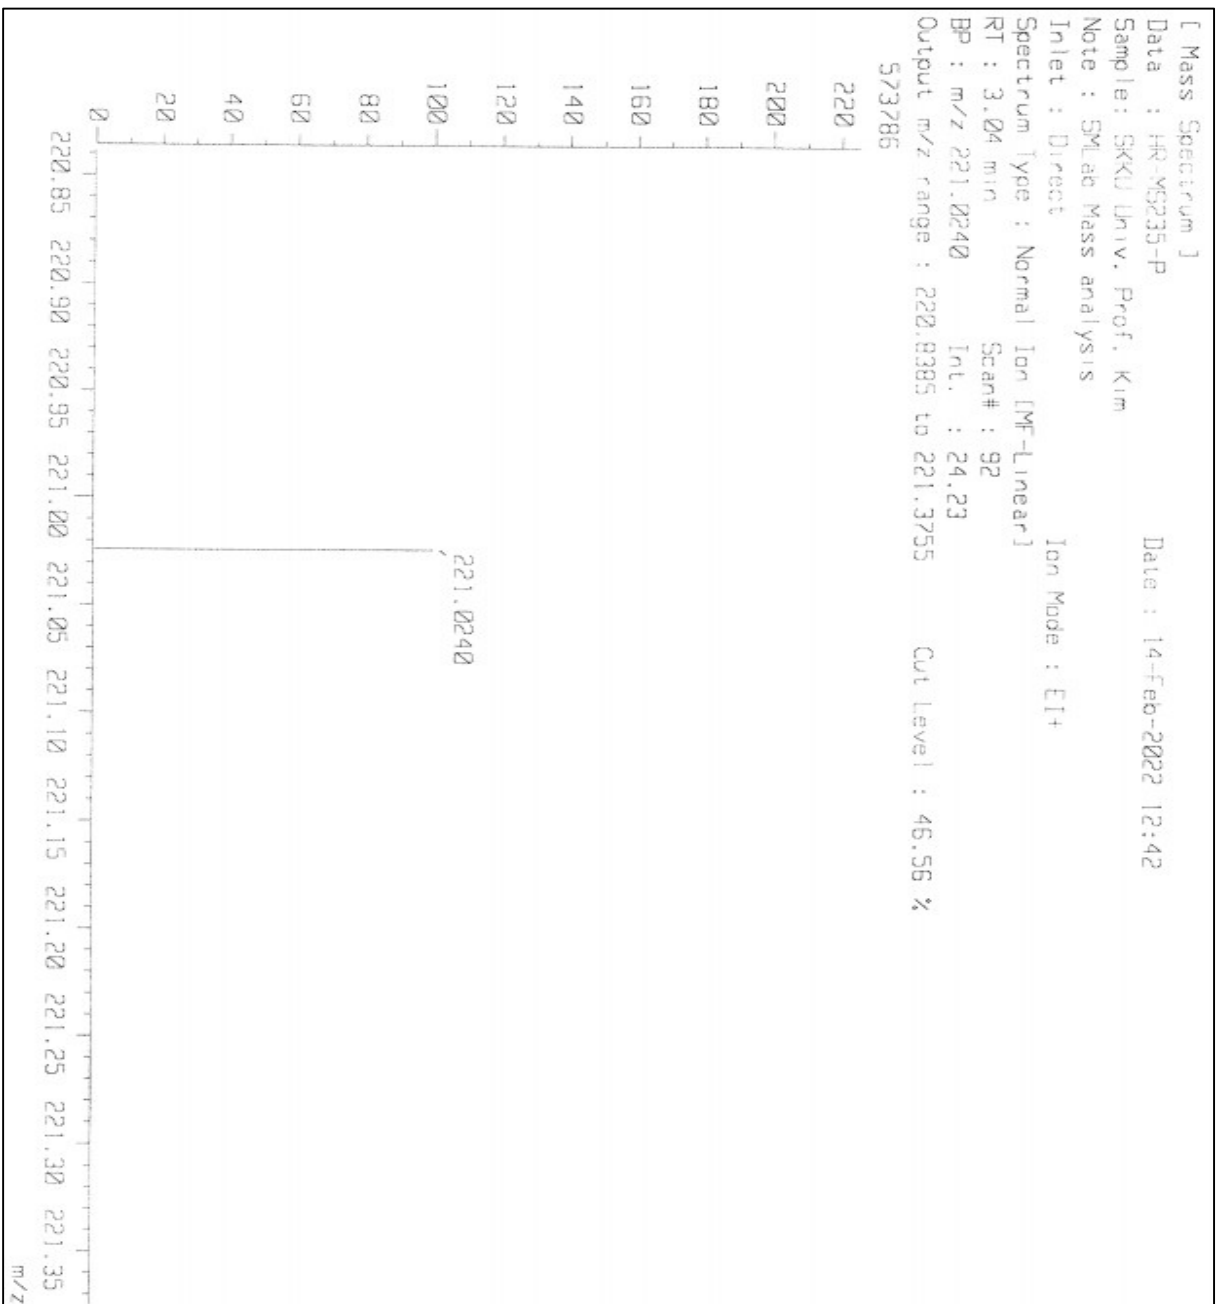

[ Elemental Composition ]

Data : 16-MS236-P-023  
 Sample: SKKU Univ. prof. Kim  
 Note : SMLab Mass analysis

Date : 21-Aug-2022 09:51

Page: 1

1c

Inlet : Direct

Ion Mode : EI+

RT : 1.20 min

Scan#: 37

Elements : C 13/0, H 10/0, O 2/0, N 1/0, F 3/0

Mass Tolerance : 1000ppm, 3mmu if m/z < 3, 5mmu if m/z > 5

Unsaturation (U.S.) : -0.5 - 70.0

| Observed m/z | Int%  | Err[ppm / mmu] | U.S. | Composition        |
|--------------|-------|----------------|------|--------------------|
| 255.0509     | 100.0 | +0.6 / +0.2    | 8.0  | C 12 H 8 O 2 N F 3 |

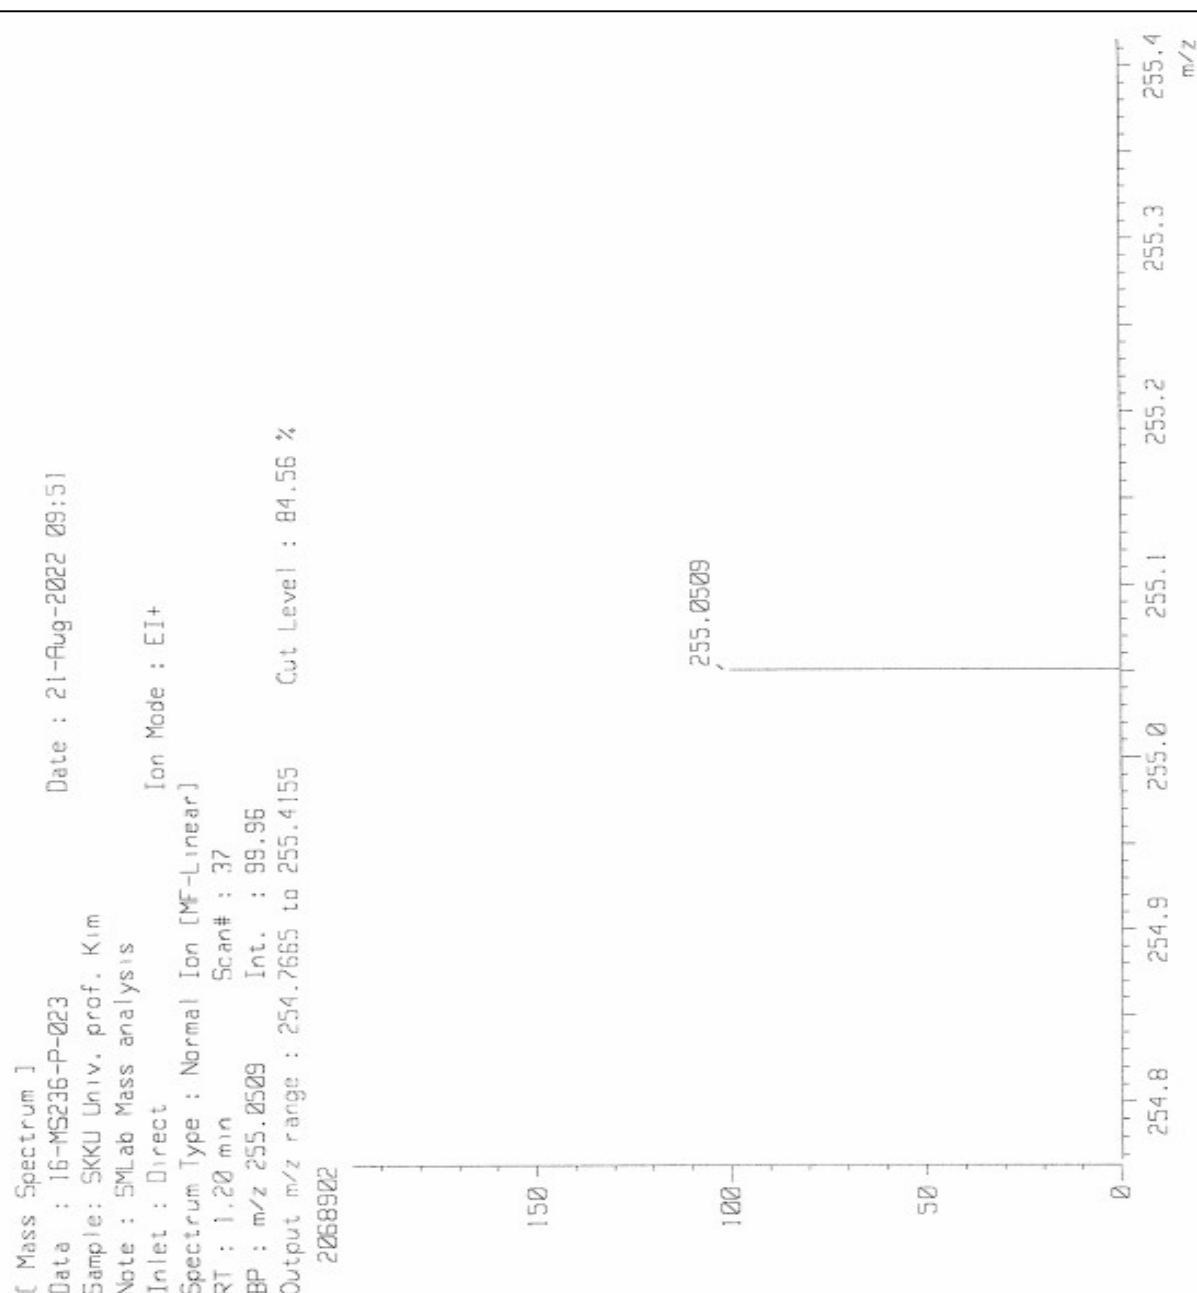

[ Elemental Composition ]

Data : 6-MS225-P-003  
Sample: SKKU Univ. prof. Kim  
Note : SMLab Mass analysis  
Inlet : Direct  
RT : 1.64 min  
Elements : C 12/0, H 10/0, O 2/0, N 1/0  
Mass Tolerance : 1000ppm, 3mmu if m/z < 3, 5mmu if m/z > 5  
Unsaturation (U.S.) : -0.5 - 70.0

Date : 03-Aug-2022 18:01

Page: 1

1d

Ion Mode : EI+  
Scan#: 50

| Observed m/z | Int%  | Err[ppm / mmu] | U.S. | Composition    |
|--------------|-------|----------------|------|----------------|
| 187.0634     | 100.0 | +0.5 / +0.1    | 8.0  | C 11 H 9 O 2 N |

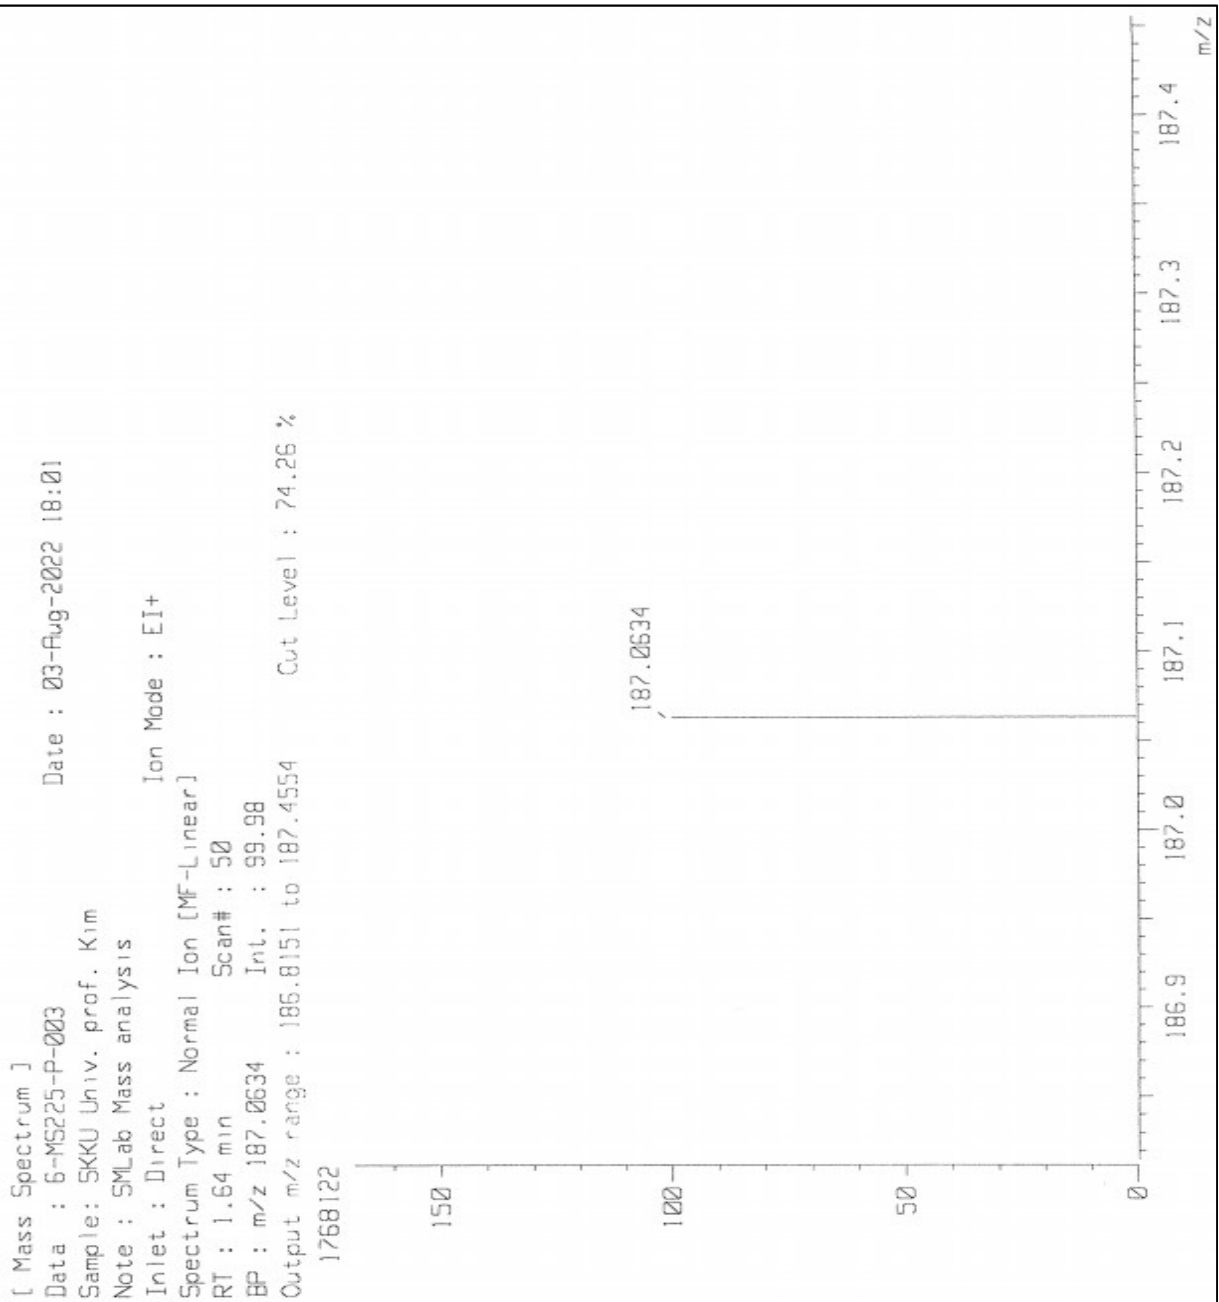

[ Elemental Composition ]

Data : 12-MS-239-P1-009 Date : 24-Feb-2022 20:51  
 Sample: SKKU Univ. Prof. Kim  
 Note : SMLab Mass analysis  
 Inlet : Direct Ion Mode : EI+  
 RT : 0.47 min Scan#: 15  
 Elements : C 12/0, H 12/0, O 3/0, N 2/0  
 Mass Tolerance : 1000ppm, 3mmu if m/z < 3, 5mmu if m/z > 5  
 Unsaturation (U.S.) : -0.5 - 70.0

1e

| Observed m/z | Int%  | Err[ppm / mmu] | U.S. | Composition     |
|--------------|-------|----------------|------|-----------------|
| 201.0788     | 100.0 | -1.0 / -0.2    | 8.0  | C 12 H 11 O 2 N |

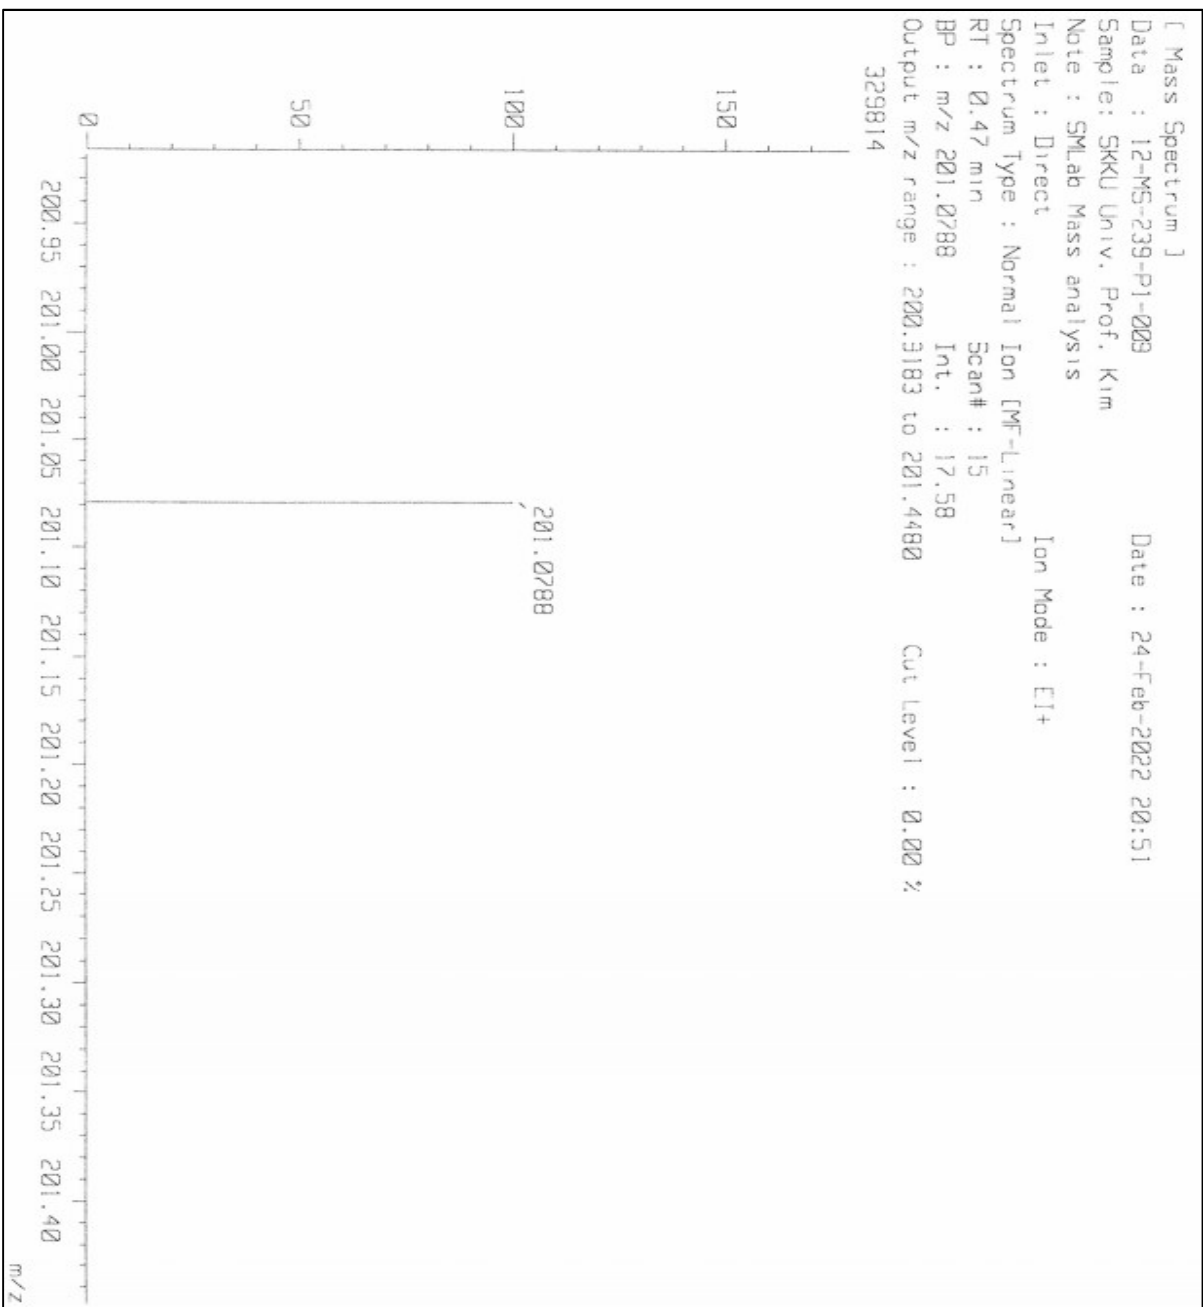

[ Elemental Composition ]

Data : 13-MS-240-P1-016 Date : 24-Feb-2022 21:07  
 Sample: SKKU Univ. Prof. Kim  
 Note : SMLab Mass analysis  
 Inlet : Direct Ion Mode : EI+  
 RT : 1.14 min Scan#: 35+36  
 Elements : C 12/0, H 12/0, O 3/0, N 2/0, Cl 1/0  
 Mass Tolerance : 1000ppm, 3mmu if m/z < 3, 5mmu if m/z > 5  
 Unsaturation (U.S.) : -0.5 - 70.0

1f

| Observed m/z | Int%  | Err[ppm / mmu] | U.S. | Composition       |
|--------------|-------|----------------|------|-------------------|
| 221.0240     | 100.0 | -1.5 / -0.3    | 8.0  | C 11 H 8 O 2 N Cl |

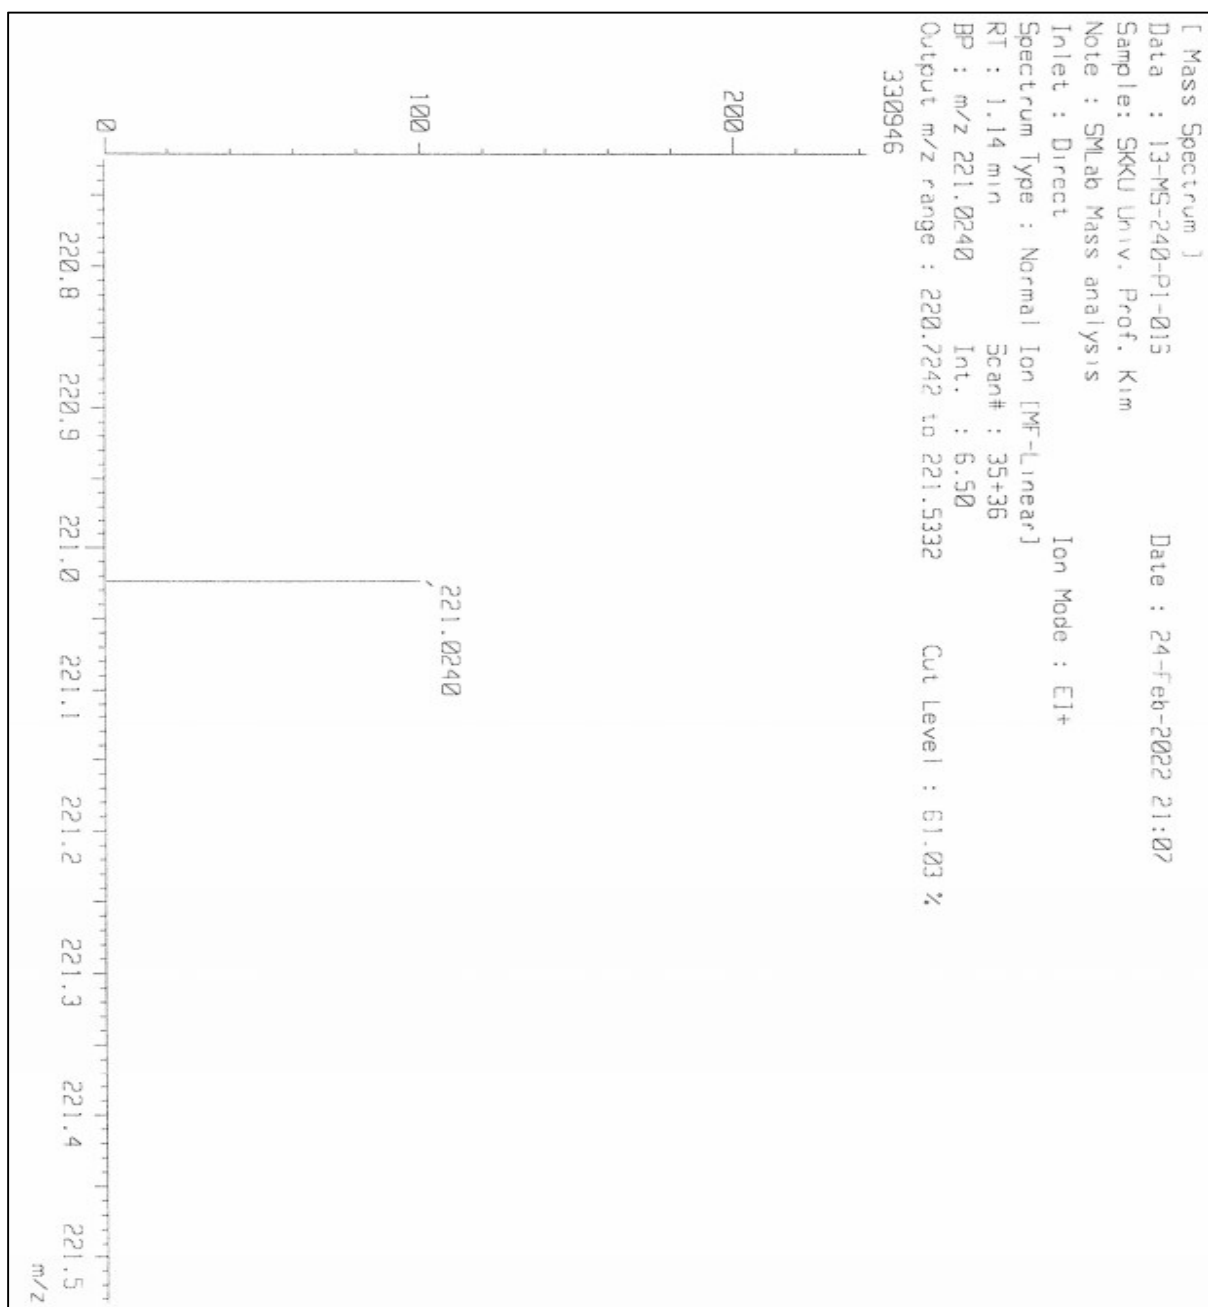



[ Elemental Composition ]

Data : 14-MS-241-P-013  
 Sample: SKKU Univ. Prof. Kim  
 Note : SMLab Mass analysis

Date : 24-Feb-2022 20:59

1g

Inlet : Direct Ion Mode : EI+  
 RT : 0.67 min Scan#: (20,22)+26  
 Elements : C 12/0, H 12/0, O 2/0, N 2/0, Br 1/0  
 Mass Tolerance : 1000ppm, 3mmu if m/z < 3, 5mmu if m/z > 5  
 Unsaturation (U.S.) : -0.5 - 70.0

| Observed m/z | Int% | Err[ppm / mmu] | U.S. | Composition       |
|--------------|------|----------------|------|-------------------|
| 264.9735     | 93.2 | -1.4 / -0.4    | 8.0  | C 11 H 8 O 2 N Br |

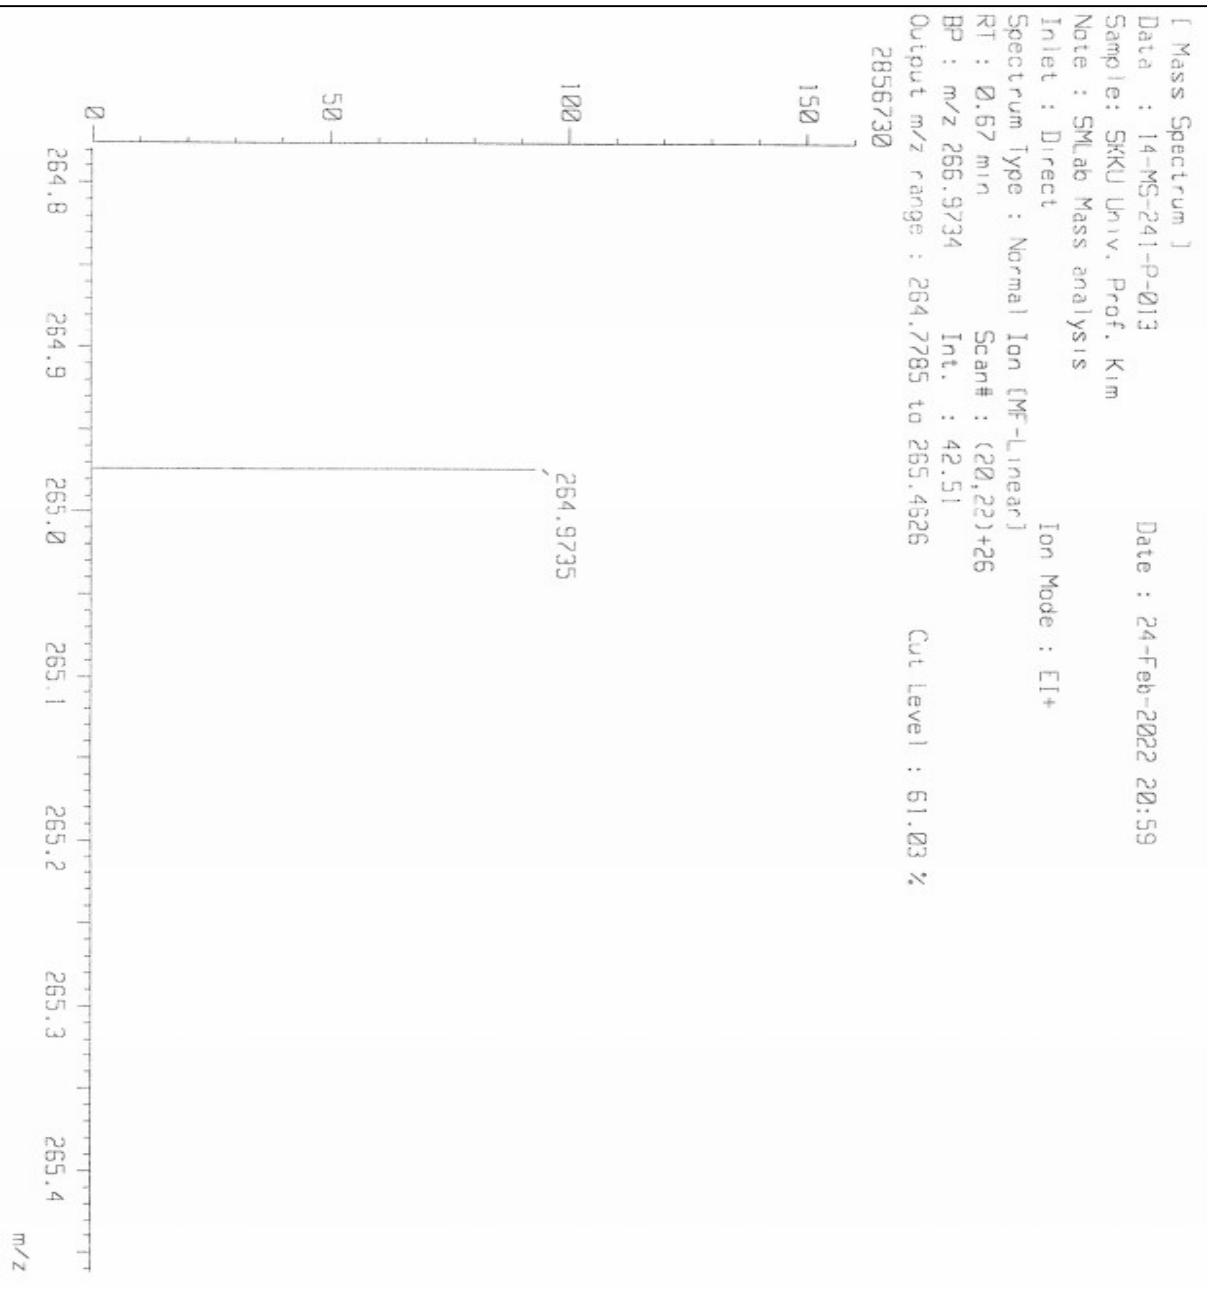

[ Elemental Composition ]

Data : 4-CE24-P-006 Date : 11-Mar-2022 17:44  
 Sample: SKKU Univ. Prof. Kim  
 Note : SMLab Mass analysis  
 Inlet : Direct Ion Mode : EI+  
 RT : 0.72 min Scan#: (21,24)  
 Elements : C 13/0, H 12/0, O 3/0, N 1/0  
 Mass Tolerance : 1000ppm, 3mmu if m/z < 3, 5mmu if m/z > 5  
 Unsaturation (U.S.) : -0.5 - 70.0

1h

| Observed m/z | Int%  | Err[ppm / mmu] | U.S. | Composition     |
|--------------|-------|----------------|------|-----------------|
| 201.0790     | 100.0 | -0.1 / +0.0    | 8.0  | C 12 H 11 O 2 N |

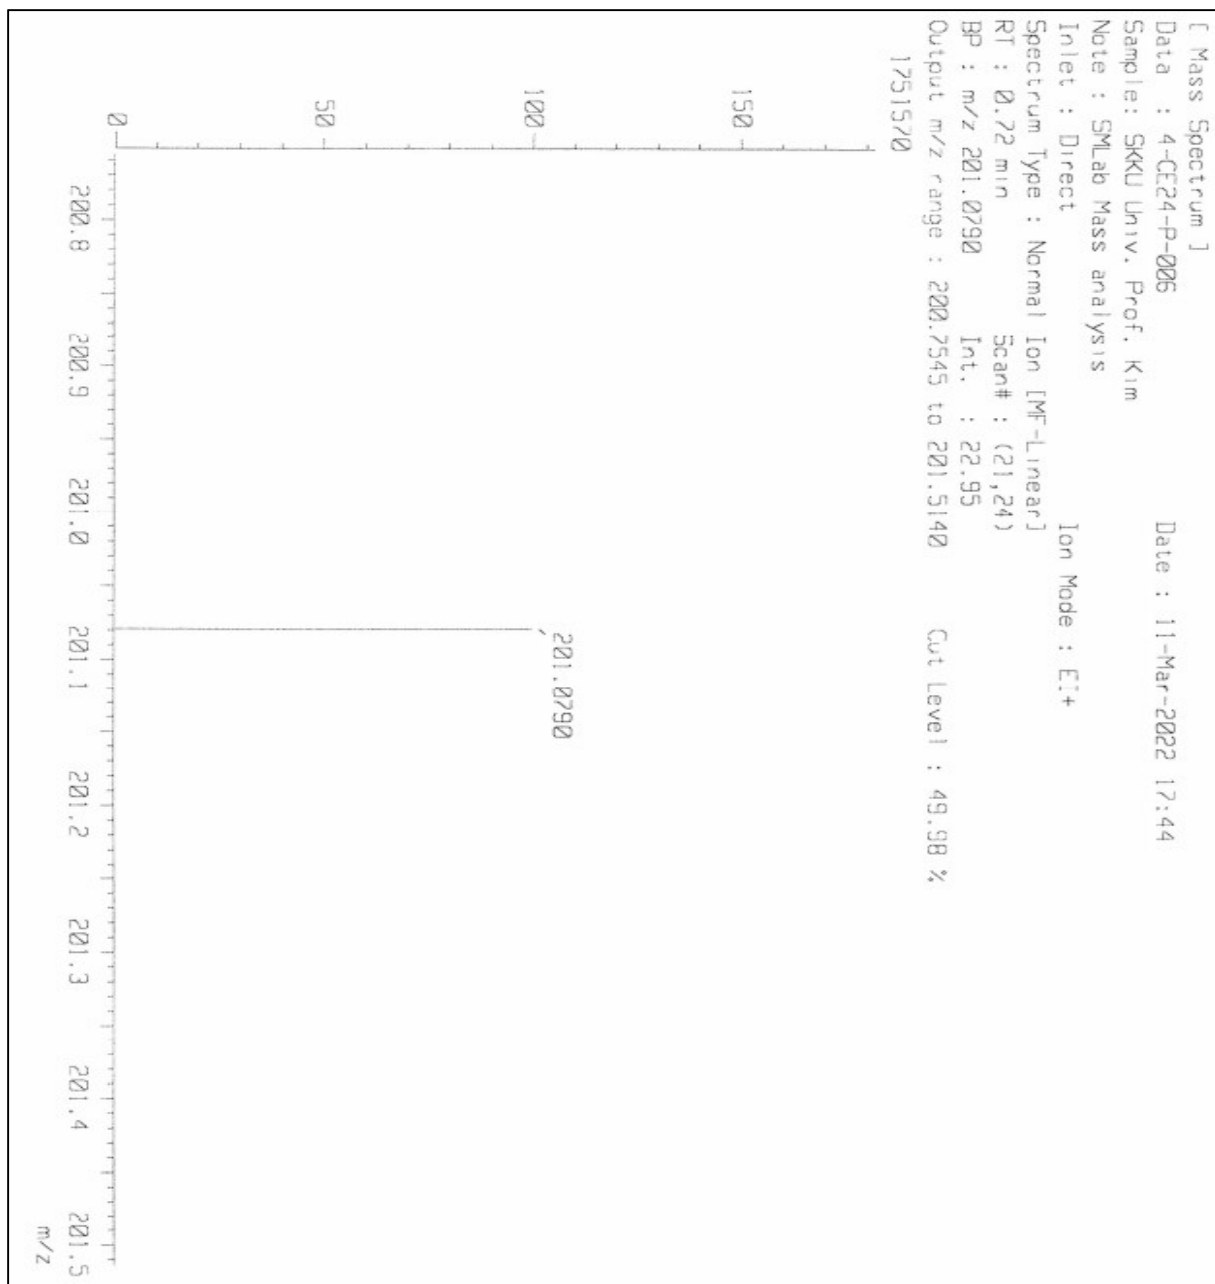

[ Elemental Composition ]

Data : 3-MS243-P-003 Date : 26-Mar-2022 08:24  
 Sample: SKKU Univ. Prof. Kim  
 Note : SMLab Mass analysis  
 Inlet : Direct Ion Mode : EI+  
 RT : 1.00 min Scan#: (30,32)  
 Elements : C 12/0, H 10/0, O 3/0, N 1/0, F 1/0  
 Mass Tolerance : 1000ppm, 3mmu if m/z < 3, 5mmu if m/z > 5  
 Unsaturation (U.S.) : -0.5 - 70.0

1i

| Observed m/z | Int% | Err[ppm / mmu] | U.S. | Composition      |
|--------------|------|----------------|------|------------------|
| 205.0538     | 81.8 | -0.7 / -0.1    | 8.0  | C 11 H 8 O 2 N F |

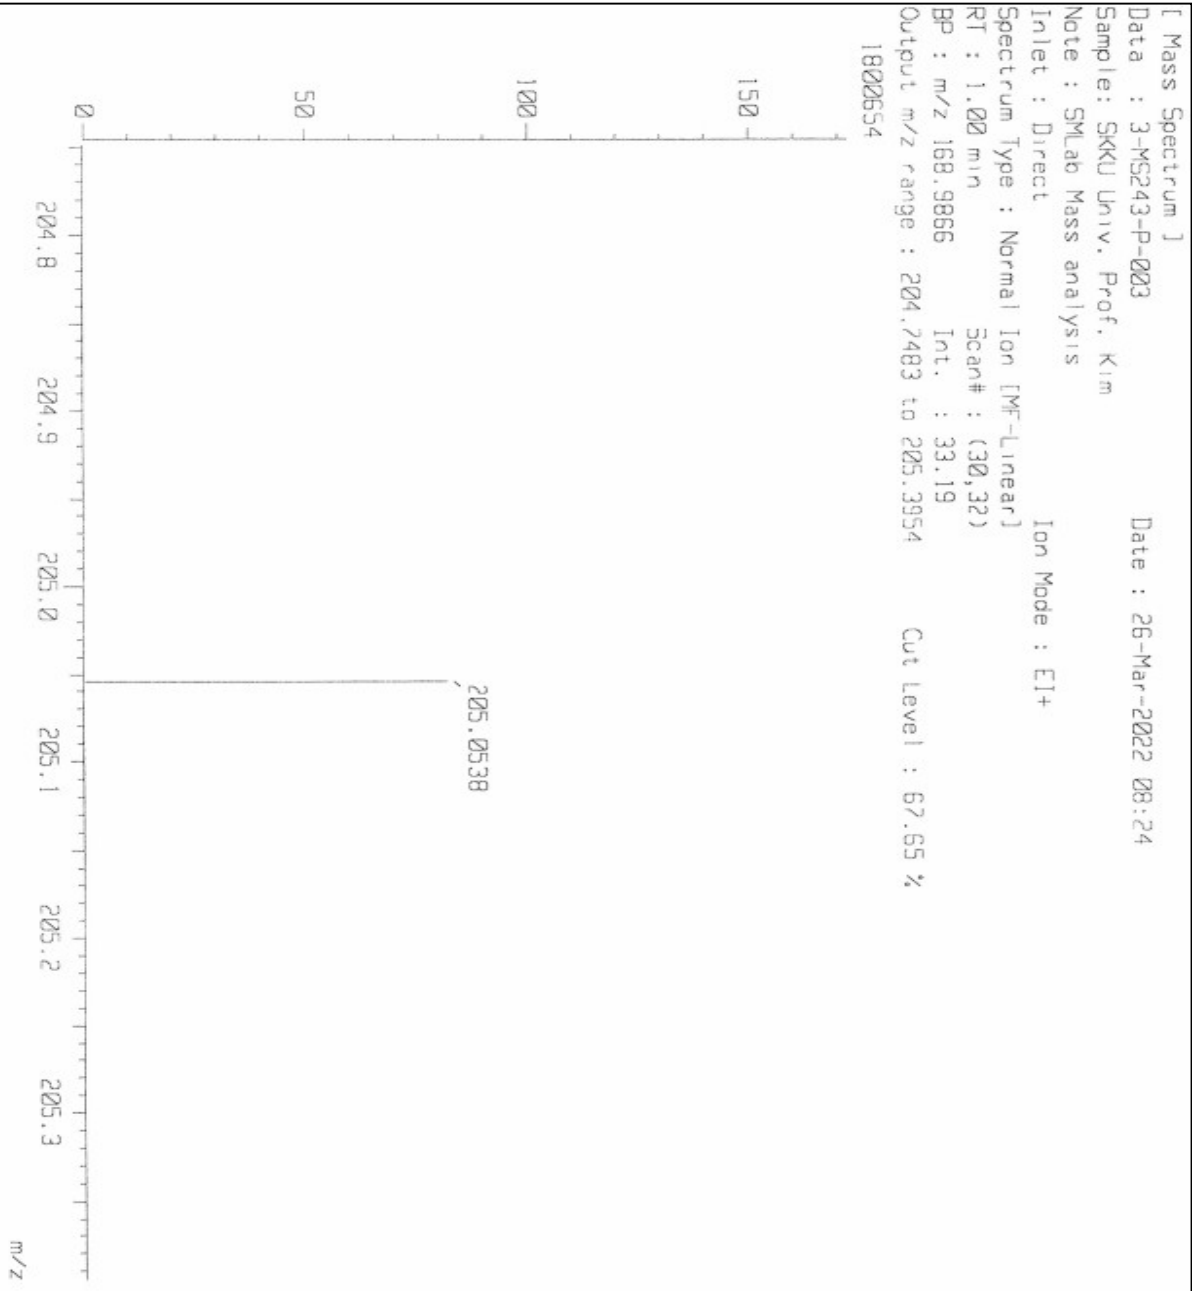

[ Elemental Composition ]

Data : 6-MS276-P-008 Date : 08-Apr-2022 20:33  
 Sample: SKKU Univ. Prof. Kim  
 Note : SMLab Mass analysis  
 Inlet : Direct Ion Mode : EI+  
 RT : 1.47 min Scan#: 45  
 Elements : C 16/0, H 12/0, O 3/0, N 2/0  
 Mass Tolerance : 1000ppm, 3mmu if m/z < 3, 5mmu if m/z > 5  
 Unsaturation (U.S.) : -0.5 - 70.0

1j

| Observed m/z | Int%  | Err[ppm / mmu] | U.S. | Composition     |
|--------------|-------|----------------|------|-----------------|
| 237.0785     | 100.0 | -1.9 / -0.4    | 11.0 | C 15 H 11 O 2 N |

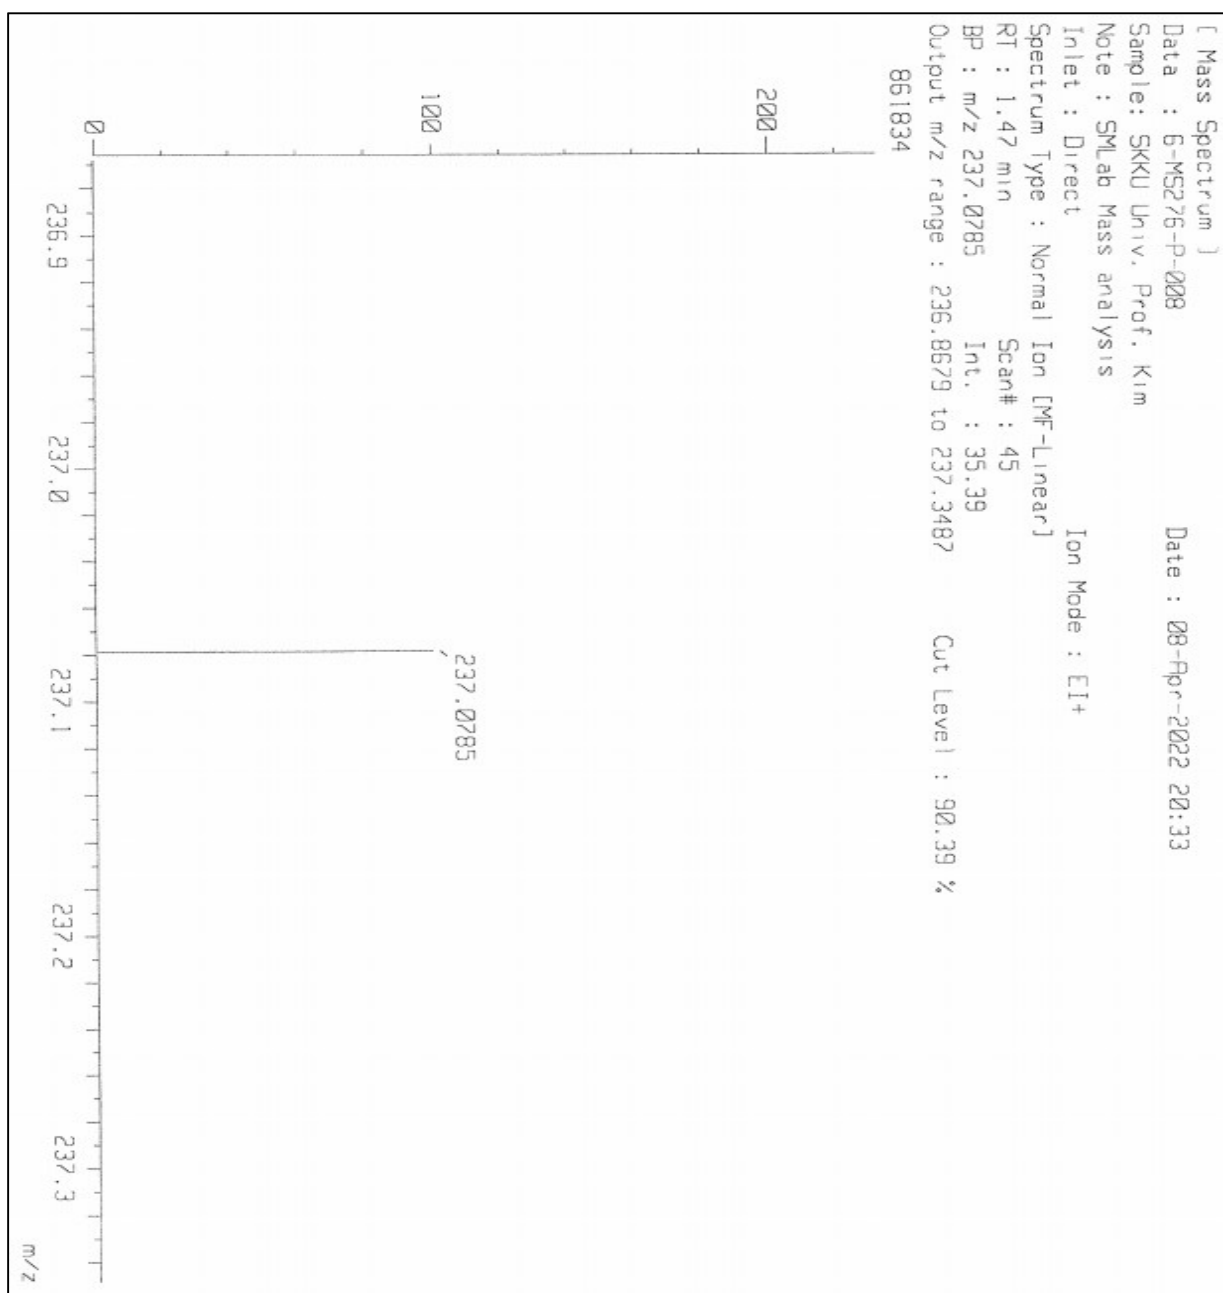

[ Elemental Composition ]

Data : 18-HR-CE38-P Date : 13-May-2022 13:40  
Sample: SKKU Univ. Prof. Kim  
Note : SMLab Mass analysis  
Inlet : Direct Ion Mode : EI+  
RT : 1.60 min Scan#: 49+47  
Elements : C 22/0, H 15/0, O 2/0, N 1/0  
Mass Tolerance : 1000ppm, 3mmu if m/z < 3, 5mmu if m/z > 5  
Unsaturation (U.S.) : -0.5 - 70.0

1k

| Observed m/z | Int% | Err[ppm / mmu] | U.S. | Composition     |
|--------------|------|----------------|------|-----------------|
| 311.0941     | 59.5 | -1.6 / -0.5    | 16.0 | C 21 H 13 O 2 N |

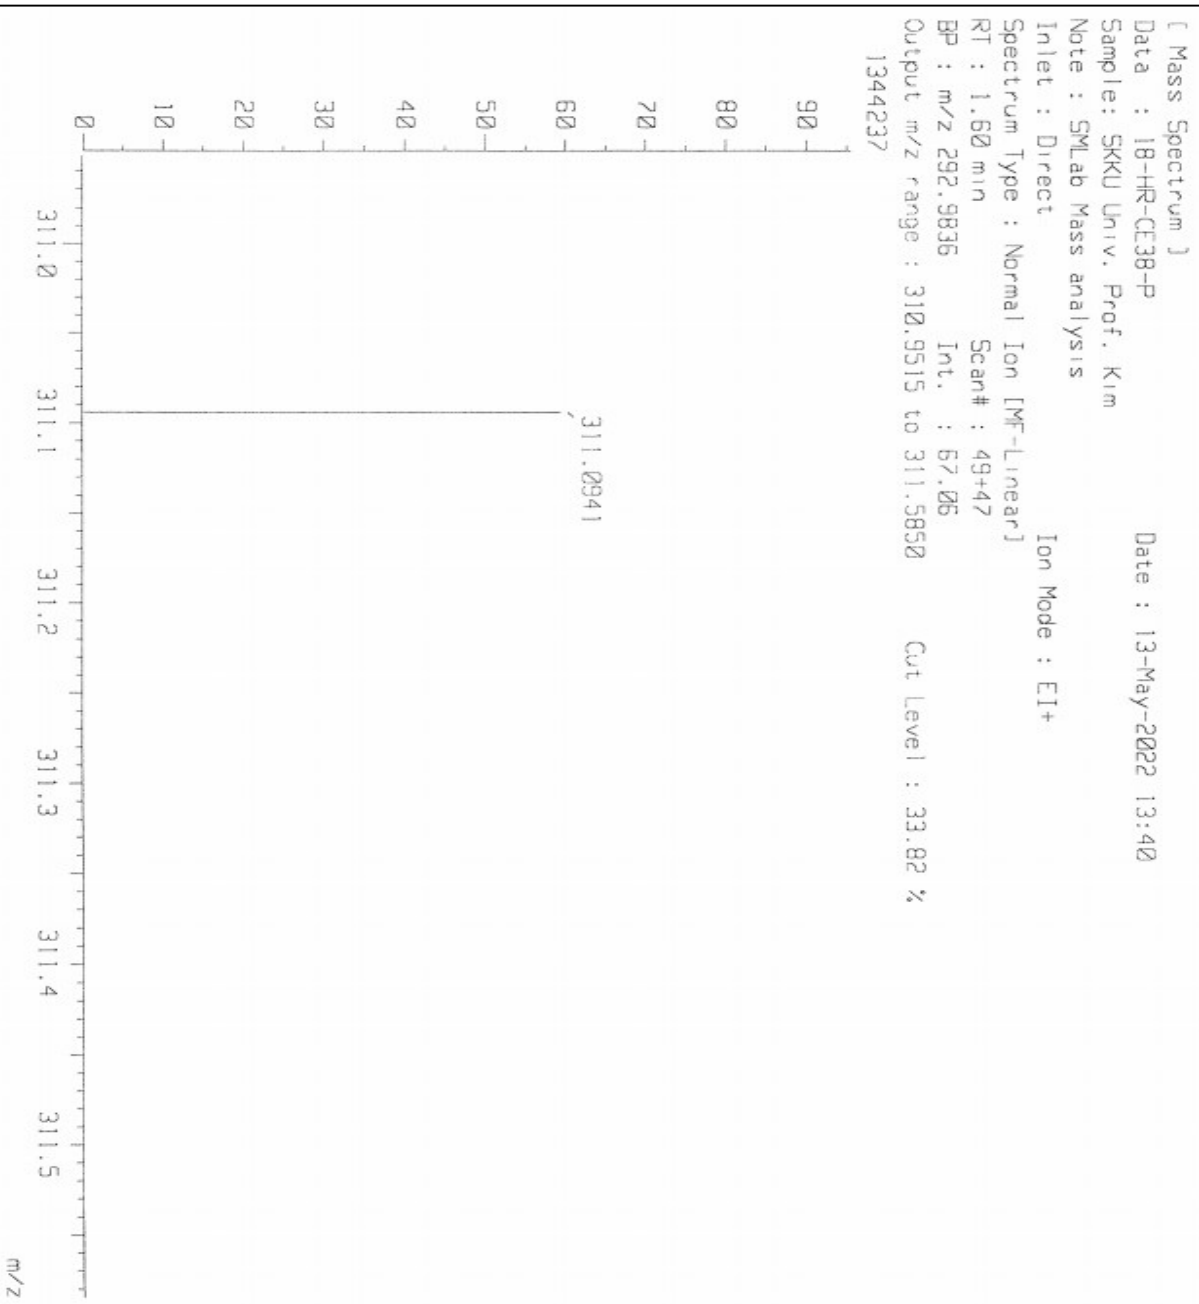

[ Elemental Composition ]

Data : 15-MS268-P2-016  
 Sample: SKKU Univ. Prof. Kim  
 Note : SMLab Mass analysis

Date : 30-Mar-2022 14:28

Page: 1

11

Inlet : Direct

Ion Mode : EI+

RT : 0.47 min

Scan#: 15

Elements : C 14/0, H 10/0, O 5/0, N 1/0

Mass Tolerance : 1000ppm, 3mmu if m/z < 3, 5mmu if m/z > 5

Unsaturation (U.S.) : -0.5 - 70.0

| Observed m/z | Int%  | Err[ppm / mmu] | U.S. | Composition    |
|--------------|-------|----------------|------|----------------|
| 231.0530     | 100.0 | -0.5 / -0.1    | 9.0  | C 12 H 9 O 4 N |

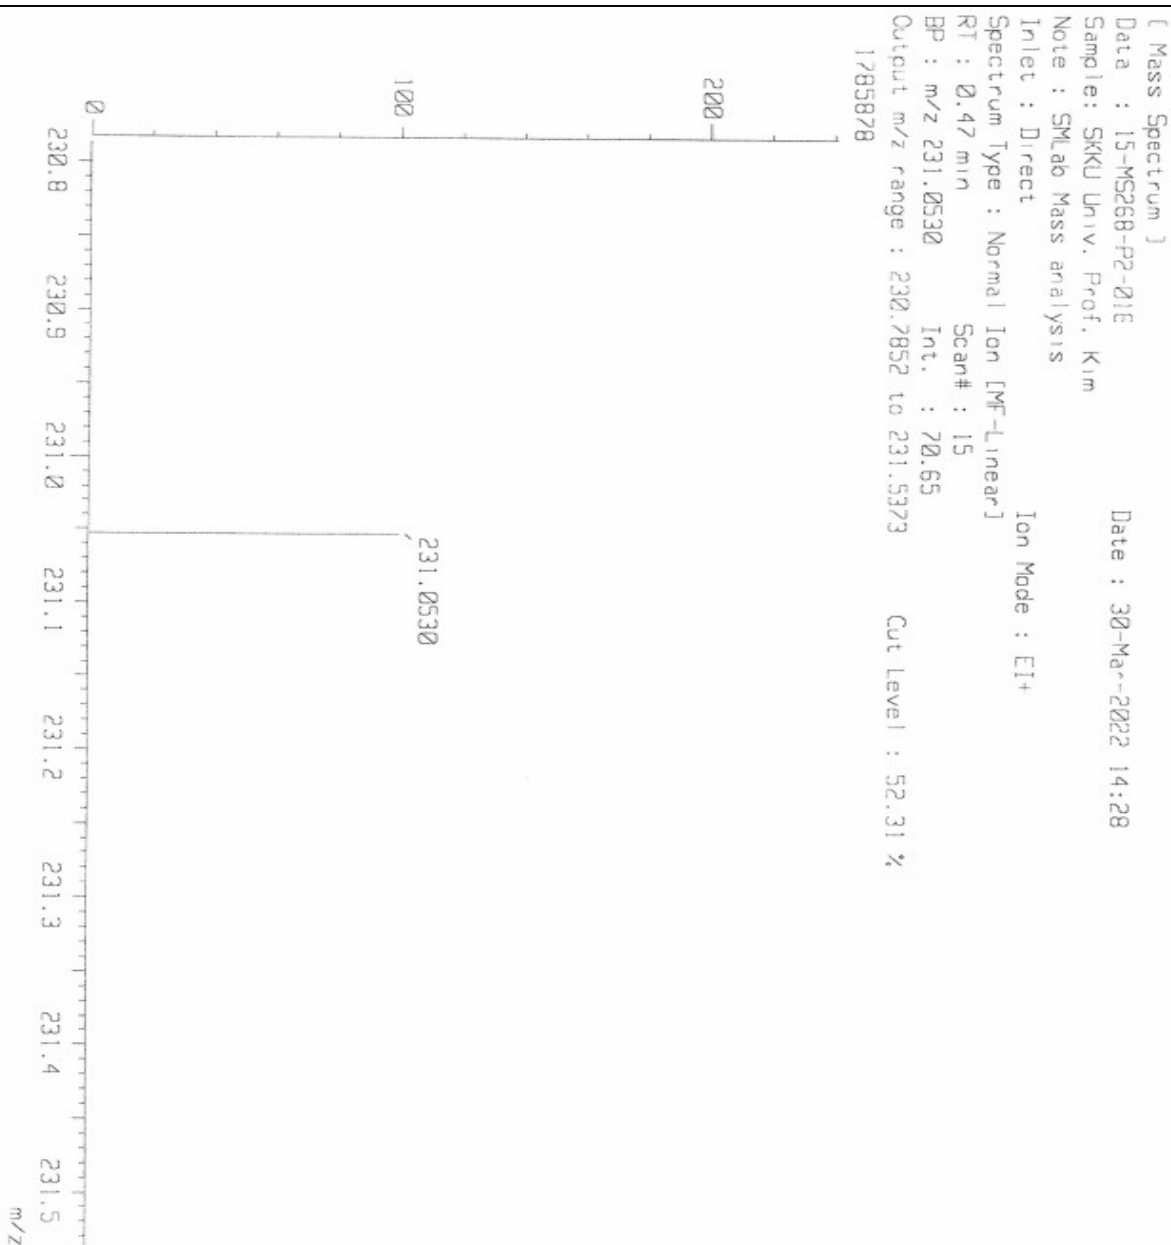

[ Elemental Composition ]

Data : 7-MS260-P-013  
 Sample: SKKU Univ. prof. Kim  
 Note : SMLab Mass analysis

Date : 03-Aug-2022 18:54

Page: 1

1m

Inlet : Direct  
 RT : 1.94 min

Ion Mode : EI+  
 Scan#: 59

Elements : C 16/0, H 15/0, O 2/0, N 2/0

Mass Tolerance : 1000ppm, 3mmu if m/z < 3, 5mmu if m/z > 5

Unsaturation (U.S.) : -0.5 - 70.0

| Observed m/z | Int%  | Err[ppm / mmu] | U.S. | Composition       |
|--------------|-------|----------------|------|-------------------|
| 240.0899     | 100.0 | -0.1 / +0.0    | 10.0 | C 14 H 12 O 2 N 2 |

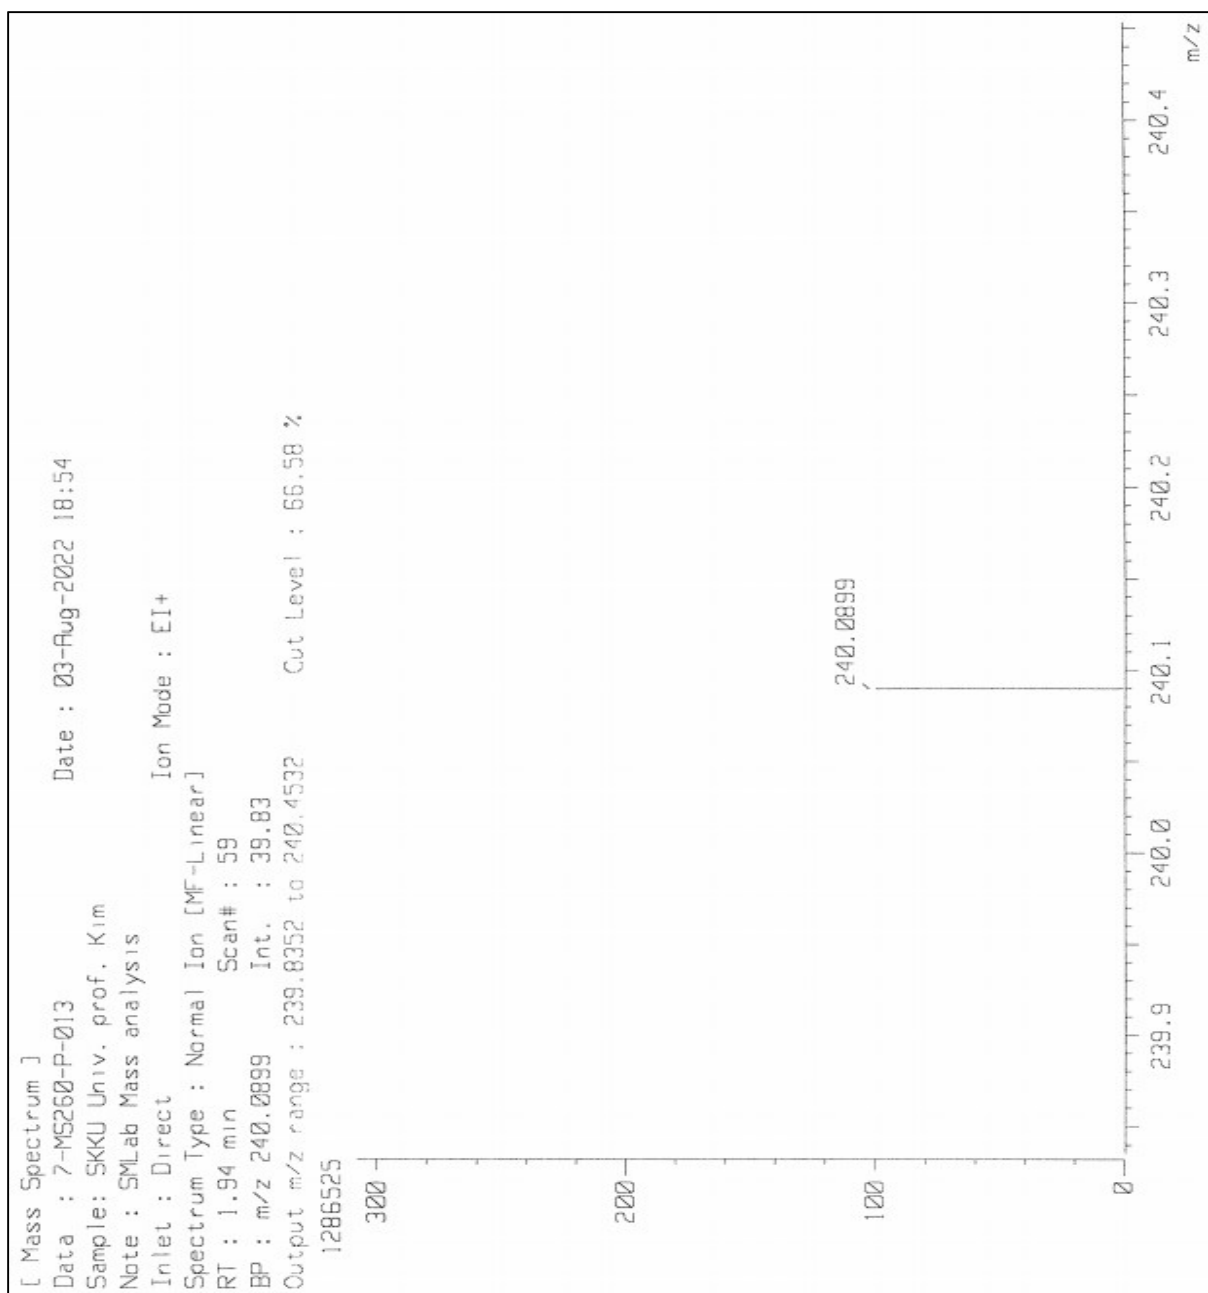

[ Elemental Composition ] Page: 1

Data : 26-CE27-028 Date : 26-Mar-2022 13:03

Sample: SKKU Univ. Prof. Kim

Note : SMLab Mass analysis 1n

Inlet : Direct Ion Mode : EI+

RT : 2.00 min Scan#: 61

Elements : C 10/0, H 10/0, O 3/0, N 3/0

Mass Tolerance : 1000ppm, 3mmu if m/z < 3, 5mmu if m/z > 5

Unsaturation (U.S.) : -0.5 - 70.0

| Observed m/z | Int%  | Err[ppm / mmu] | U.S. Composition  |
|--------------|-------|----------------|-------------------|
| 177.0426     | 100.0 | +0.1 / +0.0    | 7.0 C 9 H 7 O 3 N |

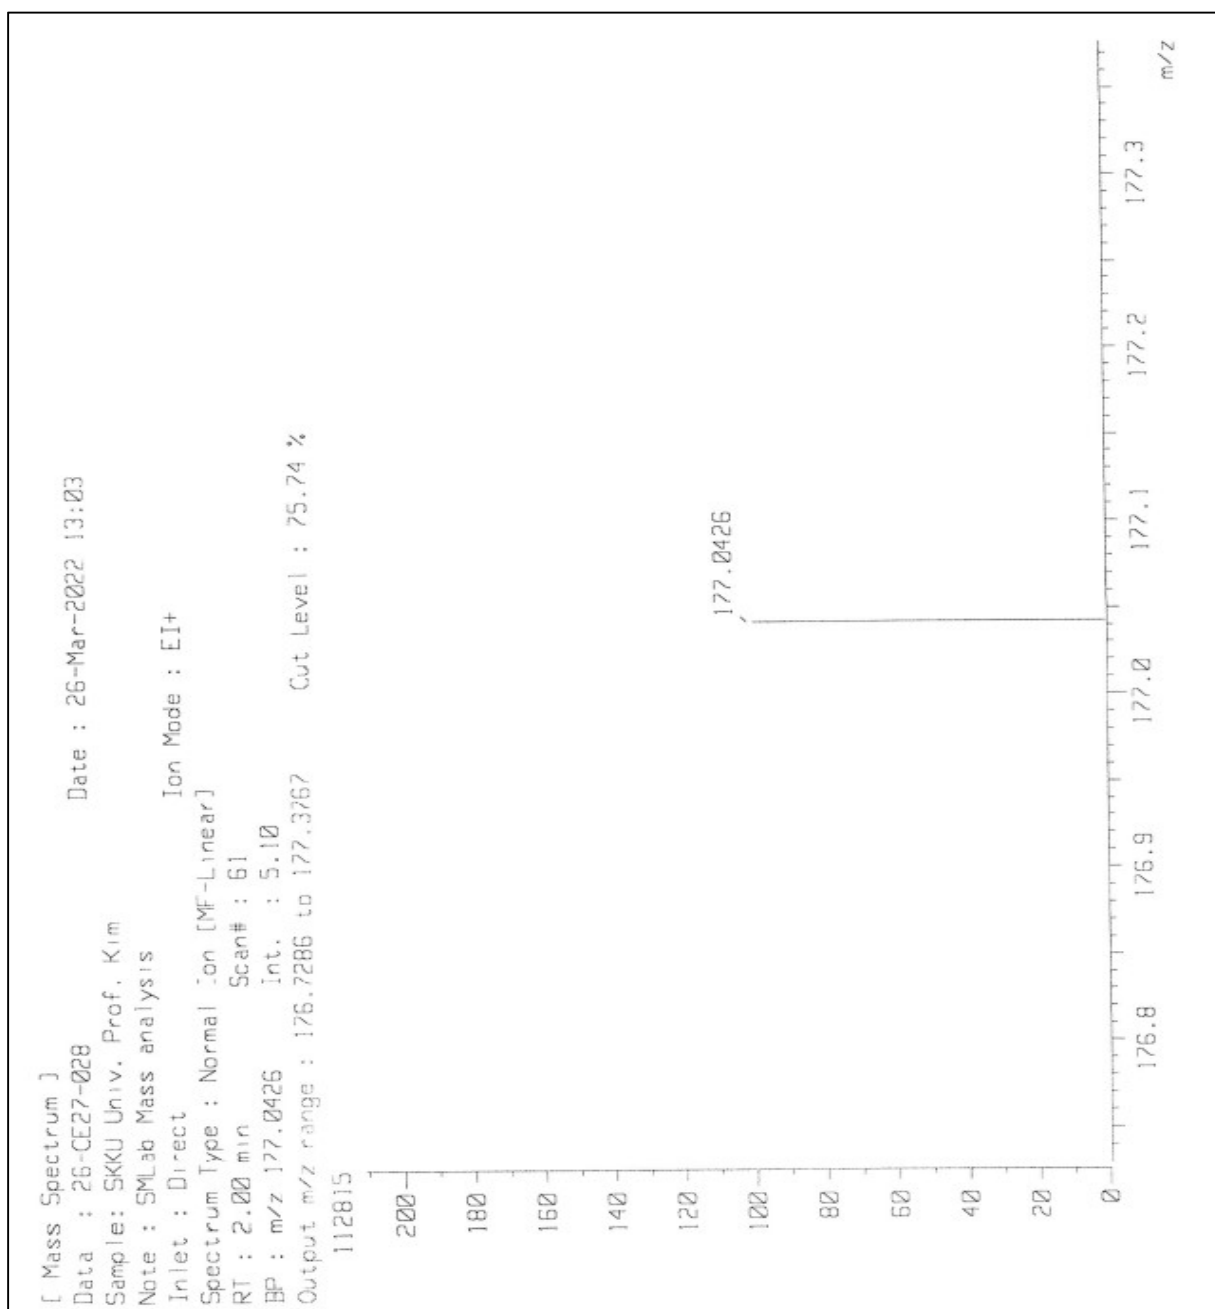



[ Elemental Composition ] Page: 1

Data : 15-CE87-P-013 Date : 08-Oct-2022 14:14

Sample: SKKU. Univ. Prof. Kim

Note : SMLab Mass analysis 10

Inlet : Direct Ion Mode : EI+

RT : 0.97 min Scan#: 30

Elements : C 10/0, H 10/0, O 2/0, N 1/0, S 1/0

Mass Tolerance : 1000ppm, 3mmu if m/z < 3, 10mmu if m/z > 10

Unsaturation (U.S.) : -0.5 - 70.0

| Observed m/z | Int% | Err[ppm / mmu] | U.S. Composition    |
|--------------|------|----------------|---------------------|
| 193.0198     | 86.6 | +0.4 / +0.1    | 8.0 C 9 H 7 O 2 N S |

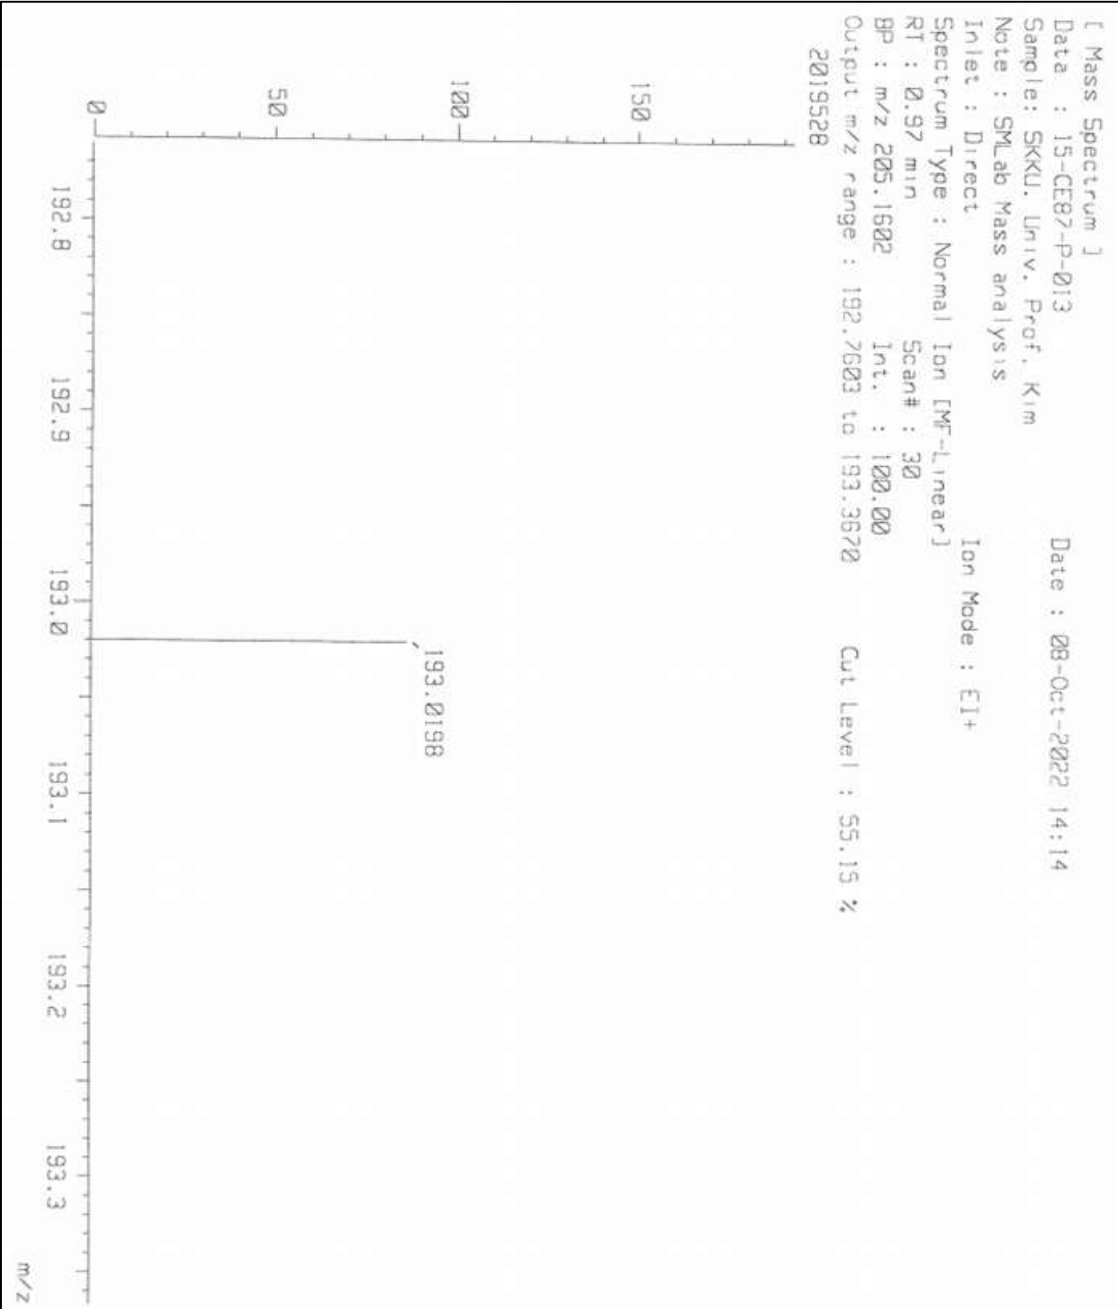

[ Elemental Composition ]

Data : 8-MS266-P-007

Date : 31-Oct-2022 16:59

Page: 1

Sample: SKKU. Univ. Prof. Kim

Note : SMLab Mass analysis

Inlet : Direct

Ion Mode : EI+

RT : 0.60 min

Scan#: 19

Elements : C 12/0, H 10/0, O 3/0, N 3/0

Mass Tolerance : 1000ppm, 3mmu if m/z < 3, 10mmu if m/z > 10

Unsaturation (U.S.) : -0.5 - 70.0

1p

| Observed m/z | Int%  | Err[ppm / mmu] | U.S. Composition     |
|--------------|-------|----------------|----------------------|
| 188.0585     | 100.0 | -0.2 / +0.0    | 8.0 C 10 H 8 O 2 N 2 |

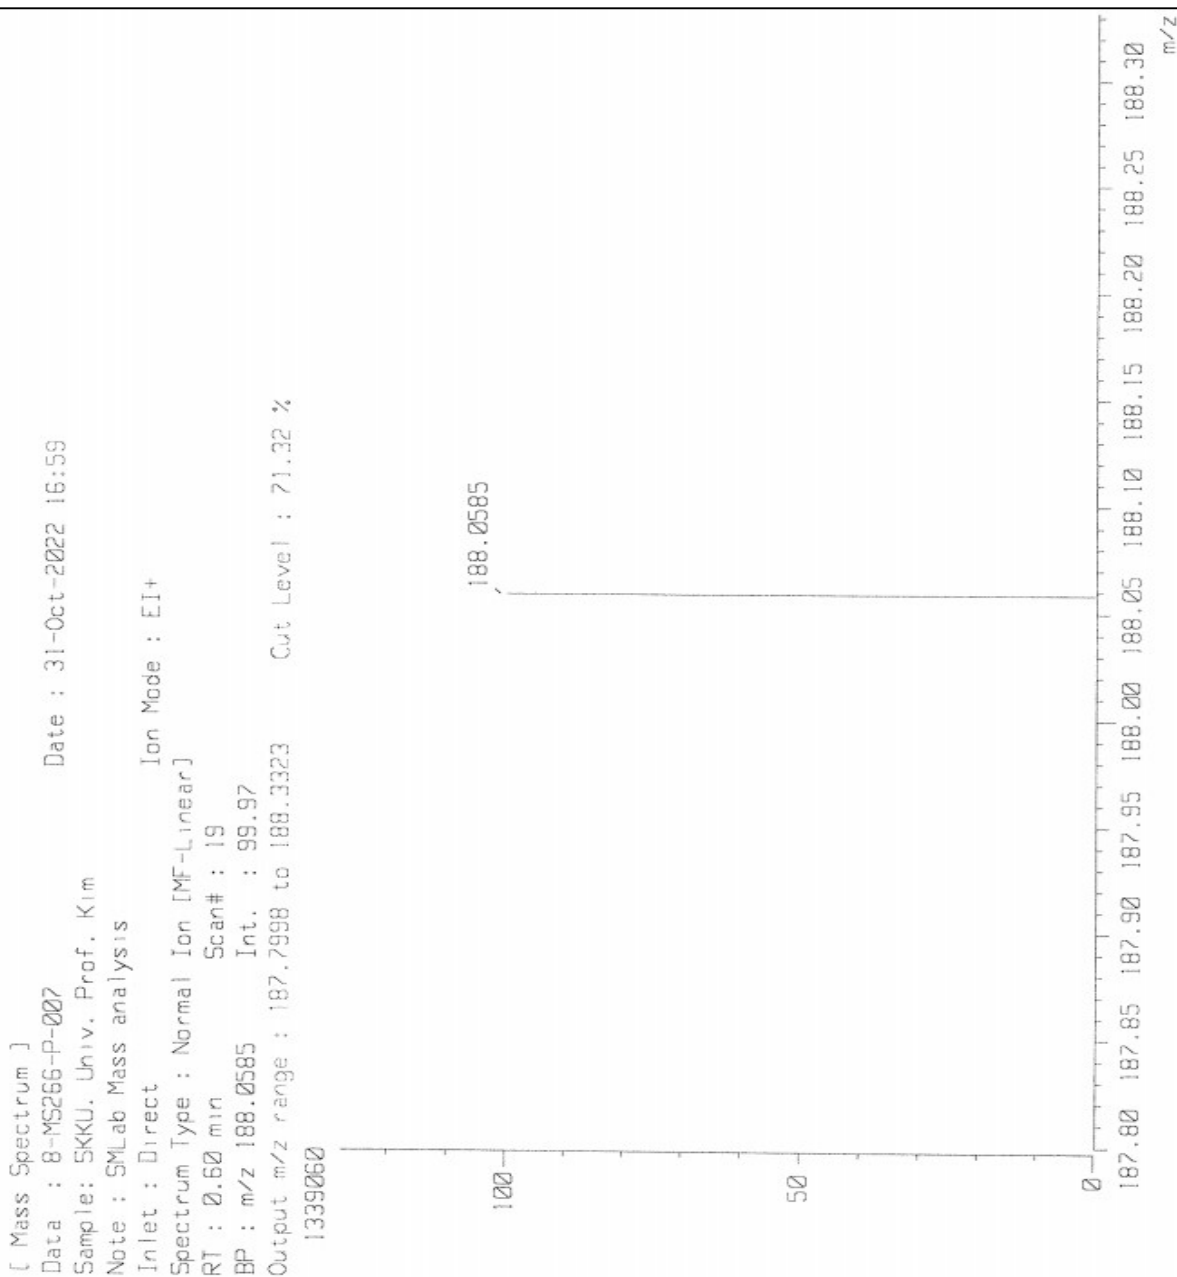

[ Elemental Composition ]

Data : 2-CE-100-P-002 Date : 31-Oct-2022 16:39  
 Sample: SKKU. Univ. Prof. Kim  
 Note : SMLab Mass analysis  
 Inlet : Direct Ion Mode : EI+  
 RT : 2.67 min Scan#: 81  
 Elements : C 10/0, H 10/0, O 3/0, N 1/0  
 Mass Tolerance : 1000ppm, 3mmu if m/z < 3, 10mmu if m/z > 10  
 Unsaturation (U.S.) : -0.5 - 70.0

1q

| Observed m/z | Int% | Err[ppm / mmu] | U.S. Composition  |
|--------------|------|----------------|-------------------|
| 151.0634     | 27.0 | +0.6 / +0.1    | 5.0 C 8 H 9 O 2 N |

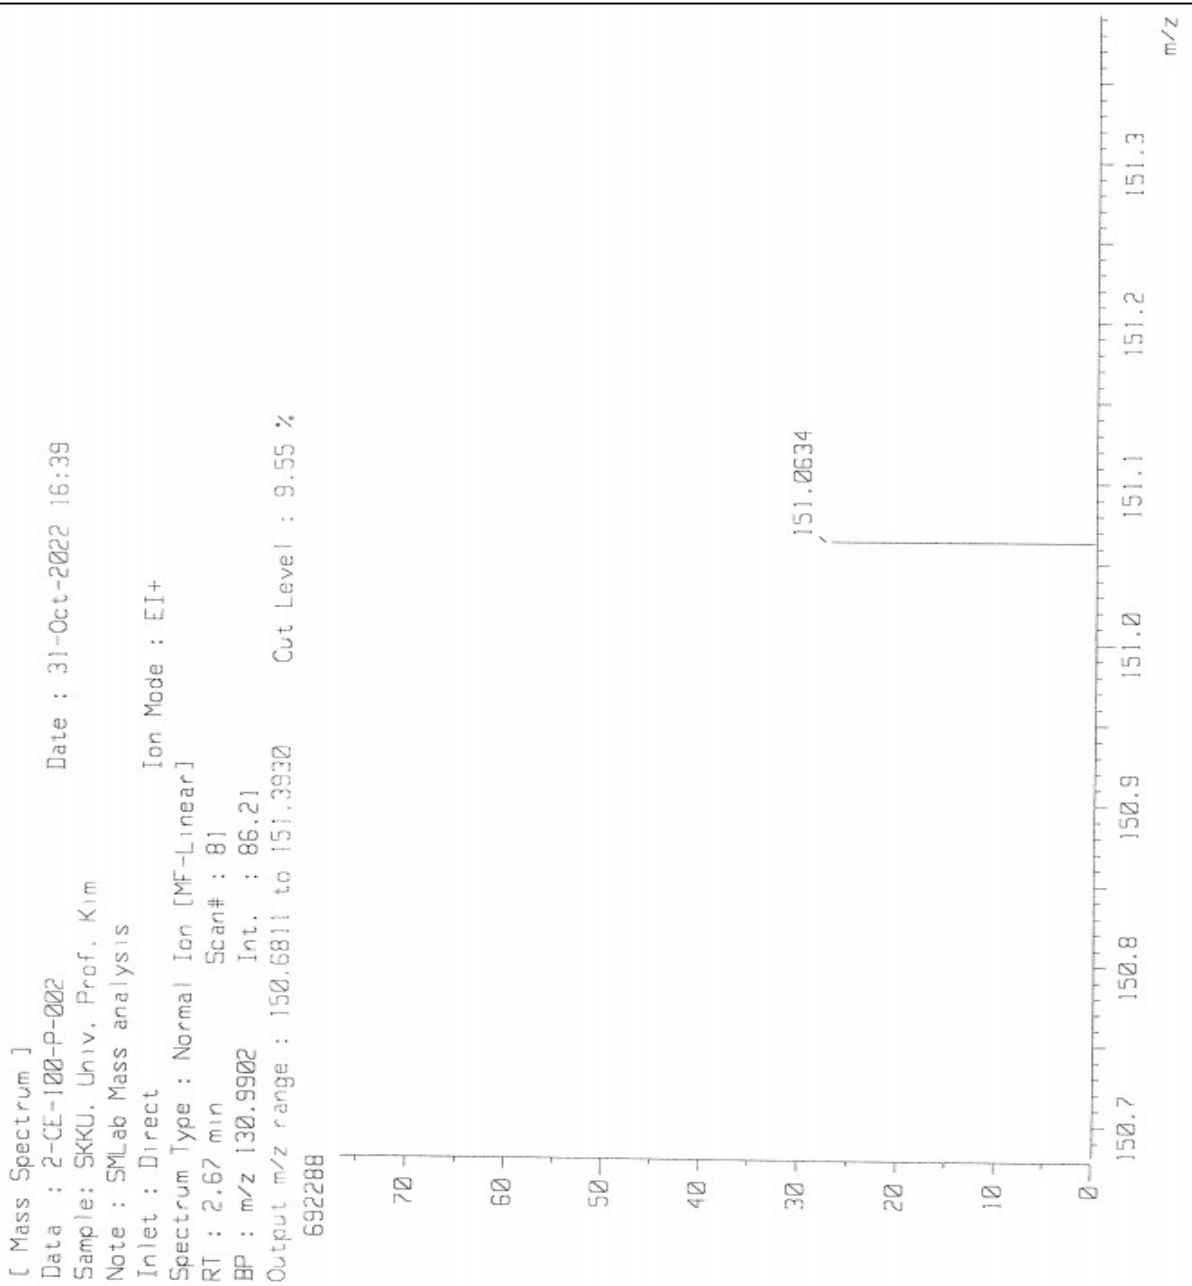

[ Elemental Composition ]

Data : 6-YV701-P-006  
 Sample: SKKU. Univ. Prof. Kim  
 Note : SMLab Mass analysis

Date : 31-Oct-2022 16:55

Inlet : Direct  
 RT : 1.80 min

Ion Mode : EI+  
 Scan#: 55+54

1r

Elements : C 12/0, H 14/0, O 3/0, N 1/0

Mass Tolerance : 1000ppm, 3mmu if m/z < 3, 10mmu if m/z > 10  
 Unsaturation (U.S.) : -0.5 - 70.0

| Observed m/z | Int% | Err[ppm / mmu] | U.S. Composition    |
|--------------|------|----------------|---------------------|
| 191.0945     | 31.0 | -0.7 / -0.1    | 6.0 C 11 H 13 O 2 N |

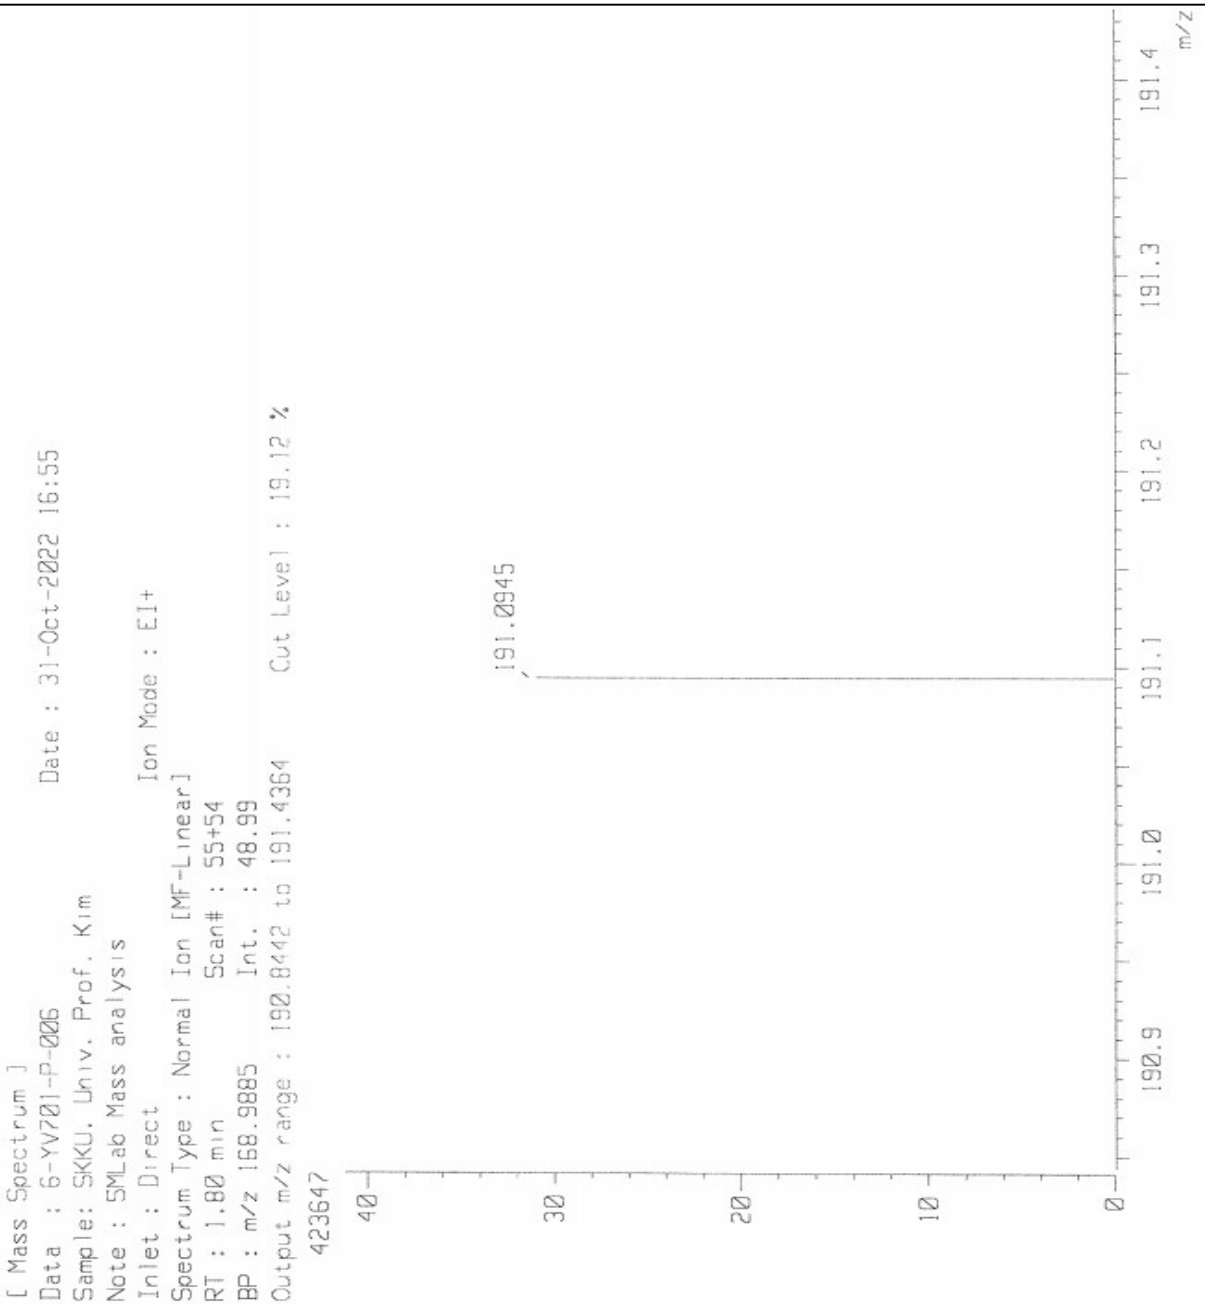

[ Elemental Composition ]

Data : 14-MS247-P-015  
 Sample: SKKU Univ. Prof. Kim  
 Note : SMLab Mass analysis

Date : 30-Mar-2022 14:25

Page: 1

1s

Inlet : Direct  
 RT : 1.20 min  
 Elements : C 15/0, H 15/0, O 2/0, N 1/0  
 Mass Tolerance : 1000ppm, 3mmu if m/z < 3, 5mmu if m/z > 5  
 Ion Mode : EI+  
 Scan#: (36,38)+32+32+31+31  
 Unsaturation (U.S.) : -0.5 - 70.0

| Observed m/z | Int% | Err[ppm / mmu] | U.S. | Composition     |
|--------------|------|----------------|------|-----------------|
| 217.1103     | 17.3 | +0.1 / +0.0    | 7.0  | C 13 H 15 O 2 N |

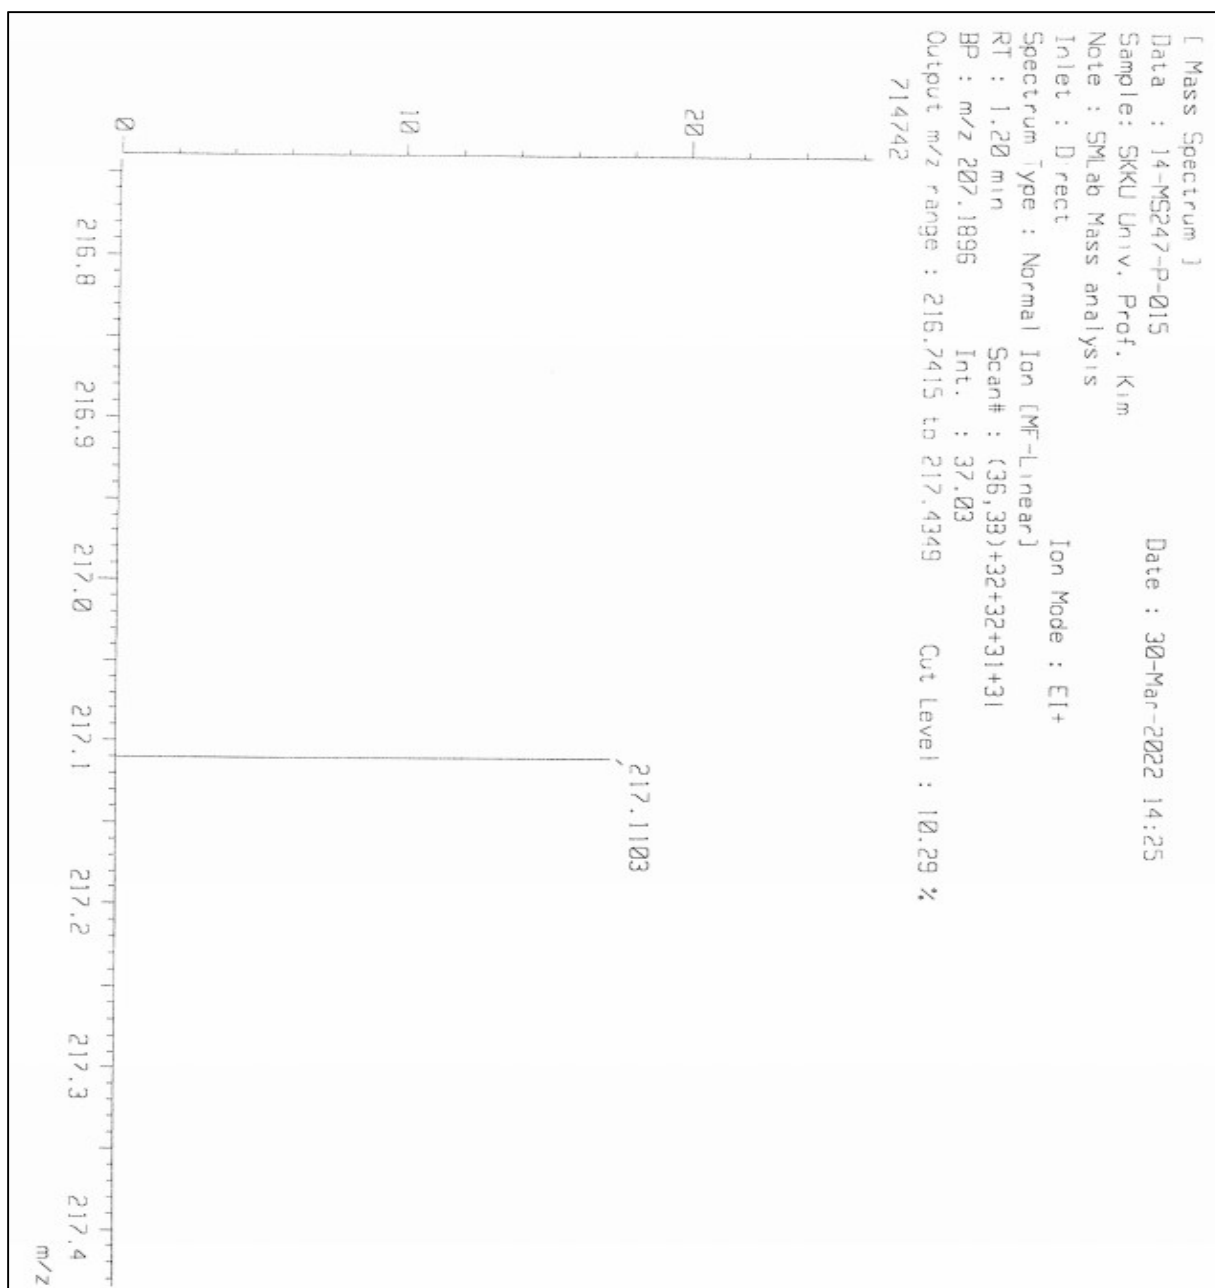

[ Elemental Composition ] Page: 1  
 Data : 12-MS208-P-013 Date : 30-Mar-2022 14:20  
 Sample: SKKU Univ. Prof. Kim  
 Note : SMLab Mass analysis 1t  
 Inlet : Direct Ion Mode : EI+  
 RT : 0.97 min Scan#: (29,31)  
 Elements : C 12/0, H 12/0, O 2/0, N 1/0  
 Mass Tolerance : 1000ppm, 3mmu if m/z < 3, 5mmu if m/z > 5  
 Unsaturation (U.S.) : -0.5 - 70.0

| Observed m/z | Int%  | Err[ppm / mmu] | U.S. | Composition     |
|--------------|-------|----------------|------|-----------------|
| 189.0787     | 100.0 | -1.4 / -0.3    | 7.0  | C 11 H 11 O 2 N |

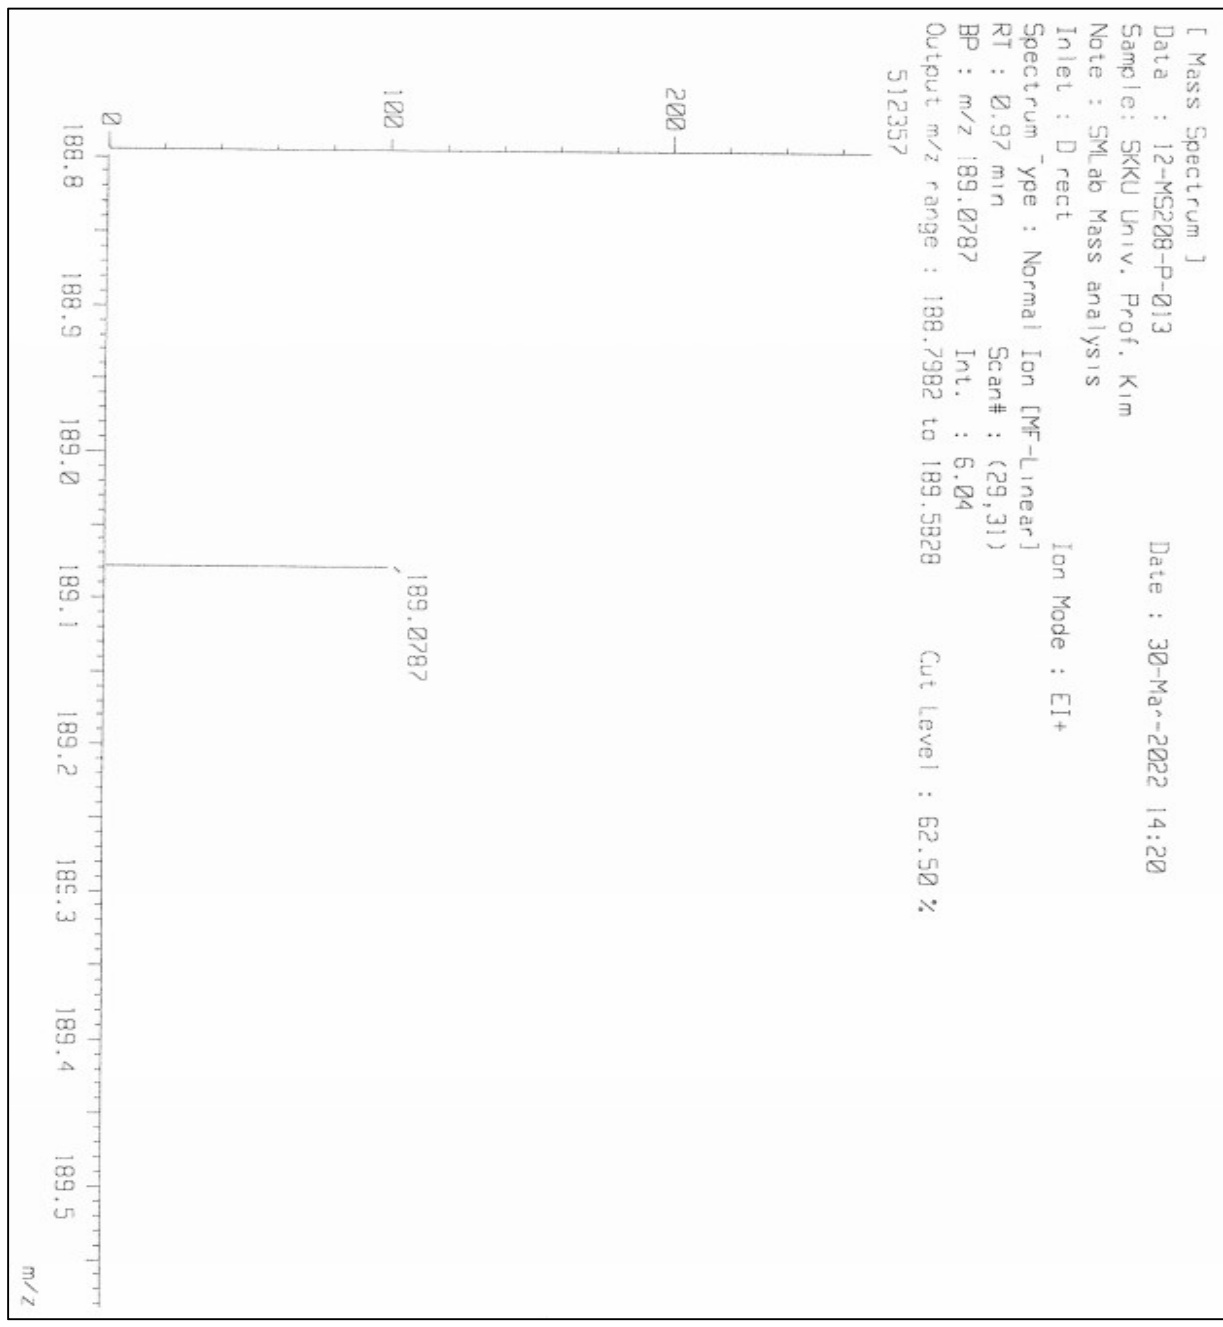

[ Elemental Composition ]

Data : FAB-SG-93-P-003

Date : 25-Mar-2022 16:08

Sample: SKKU Univ. Prof. Kim

Note : SM Lab Research Center

Inlet : Reserv.

Ion Mode : FAB+

RT : 3.38 min

Scan#: (101,104)+100+104+104

Elements : C 25/0, H 25/0, O 5/0, N 1/0, F 3/0, Ir 1/0

Mass Tolerance : 1000ppm, 3mmu if m/z < 3, 10mmu if m/z > 10

Unsaturation (U.S.) : -0.5 - 80.0

3a

| Observed m/z | Int%  | Err[ppm / mmu] | U.S. | Composition            |
|--------------|-------|----------------|------|------------------------|
| 641.1362     | 100.0 | -0.4 / -0.3    | 12.0 | C 24 H 25 O 4 N F 3 Ir |

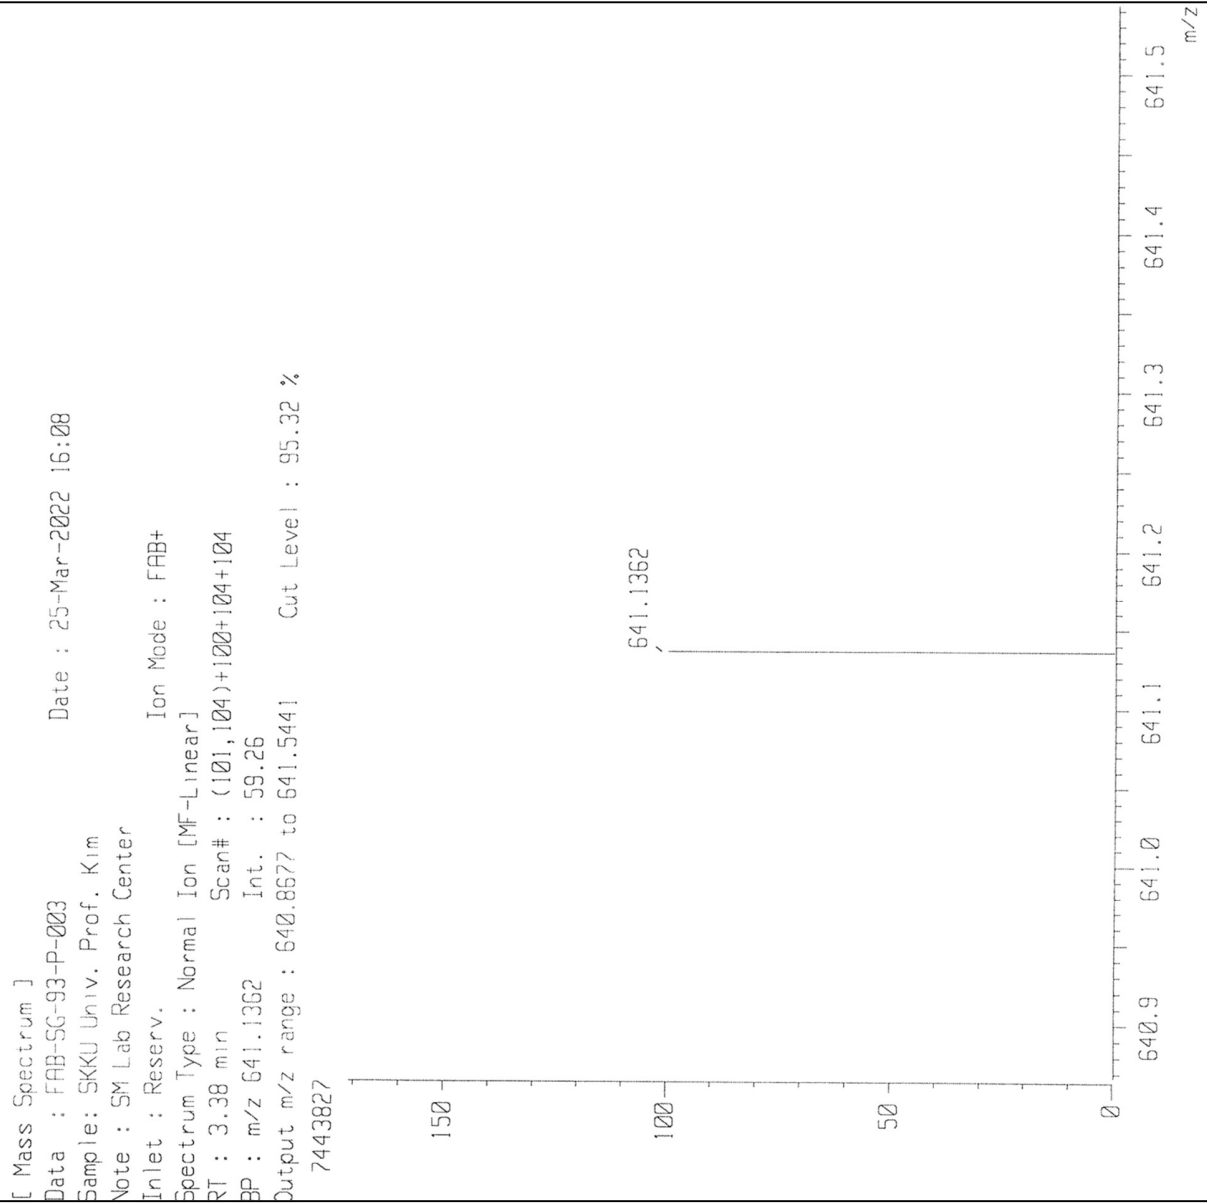

[ Elemental Composition ]

Data : 8-SG73-P-010  
 Sample: SKKU Univ. Prof. Kim  
 Note : SMLab Mass analysis

Date : 11-Mar-2022 17:57

3b

Inlet : Direct Ion Mode : EI+  
 RT : 1.14 min Scan#: 35  
 Elements : C 18/0, H 15/0, O 3/0, N 3/0, Cl 1/0  
 Mass Tolerance : 1000ppm, 3mmu if m/z < 3, 5mmu if m/z > 5  
 Unsaturation (U.S.) : -0.5 - 70.0

| Observed m/z | Int%  | Err[ppm / mmu] | U.S. | Composition          |
|--------------|-------|----------------|------|----------------------|
| 340.0615     | 100.0 | +0.1 / +0.0    | 13.0 | C 18 H 13 O 3 N 2 Cl |

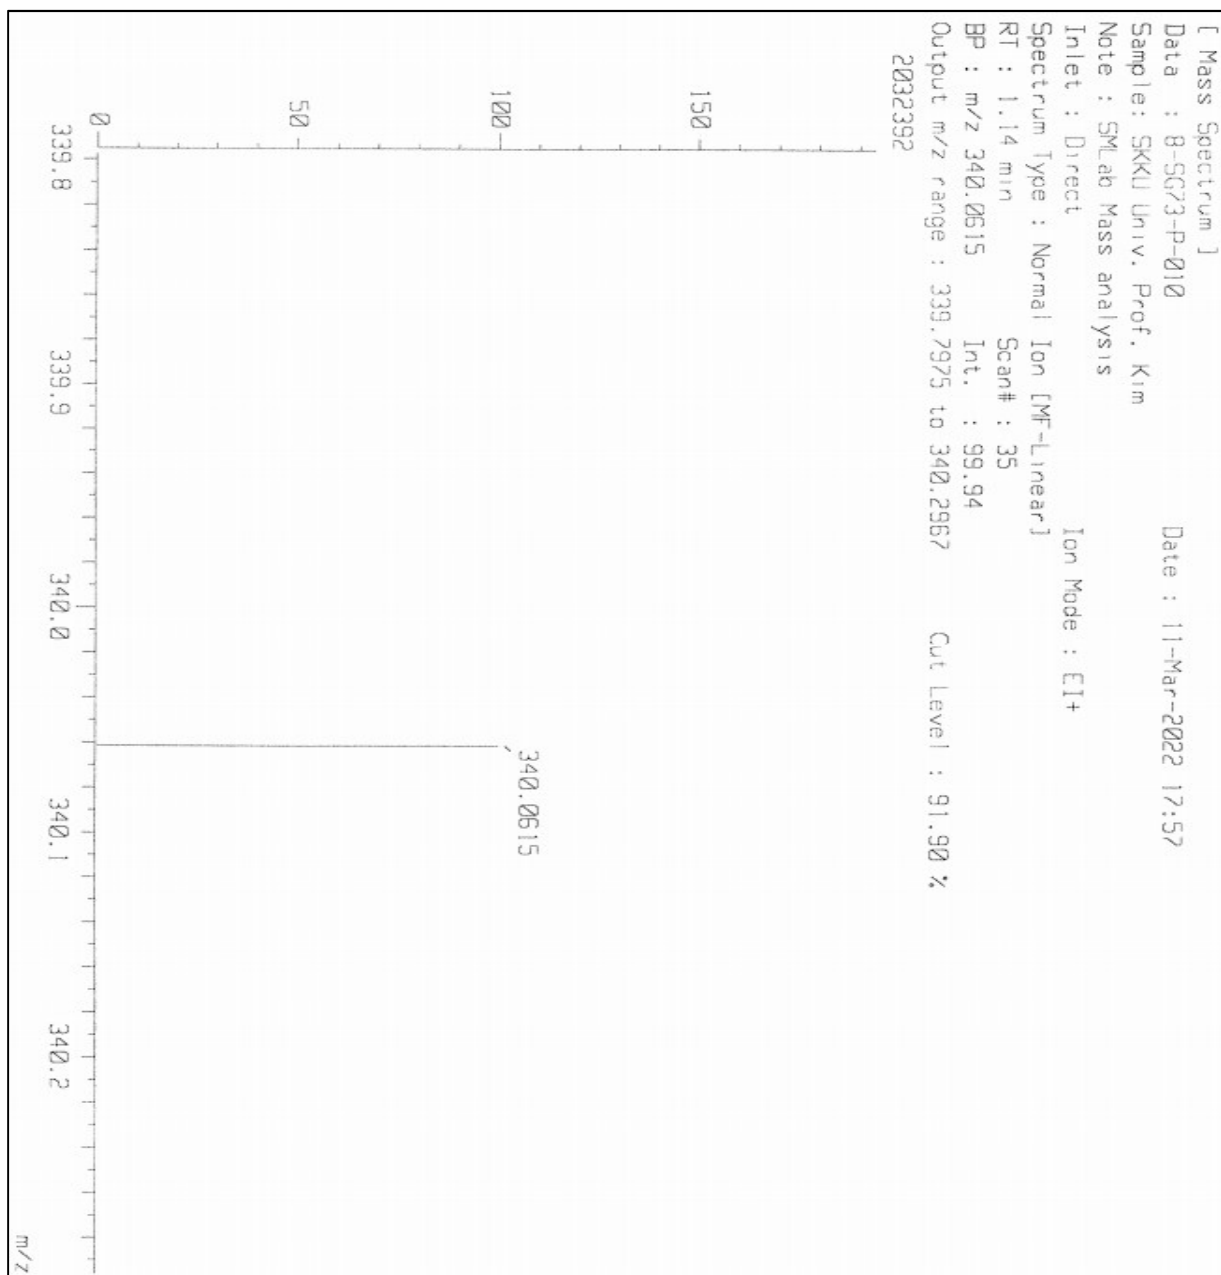



[ Elemental Composition ]

Data : 9-SG74-P-011 Date : 11-Mar-2022 18:00  
 Sample: SKKU Univ. Prof. Kim  
 Note : SMLab Mass analysis  
 Inlet : Direct Ion Mode : EI+  
 RT : 0.87 min Scan#: 27  
 Elements : C 20/0, H 15/0, O 3/0, N 3/0, F 3/0  
 Mass Tolerance : 1000ppm, 3mmu if m/z < 3, 5mmu if m/z > 5  
 Unsaturation (U.S.) : -0.5 - 70.0

3c

| Observed m/z | Int%  | Err[ppm / mmu] | U.S. | Composition           |
|--------------|-------|----------------|------|-----------------------|
| 374.0879     | 100.0 | +0.3 / +0.1    | 13.0 | C 19 H 13 O 3 N 2 F 3 |

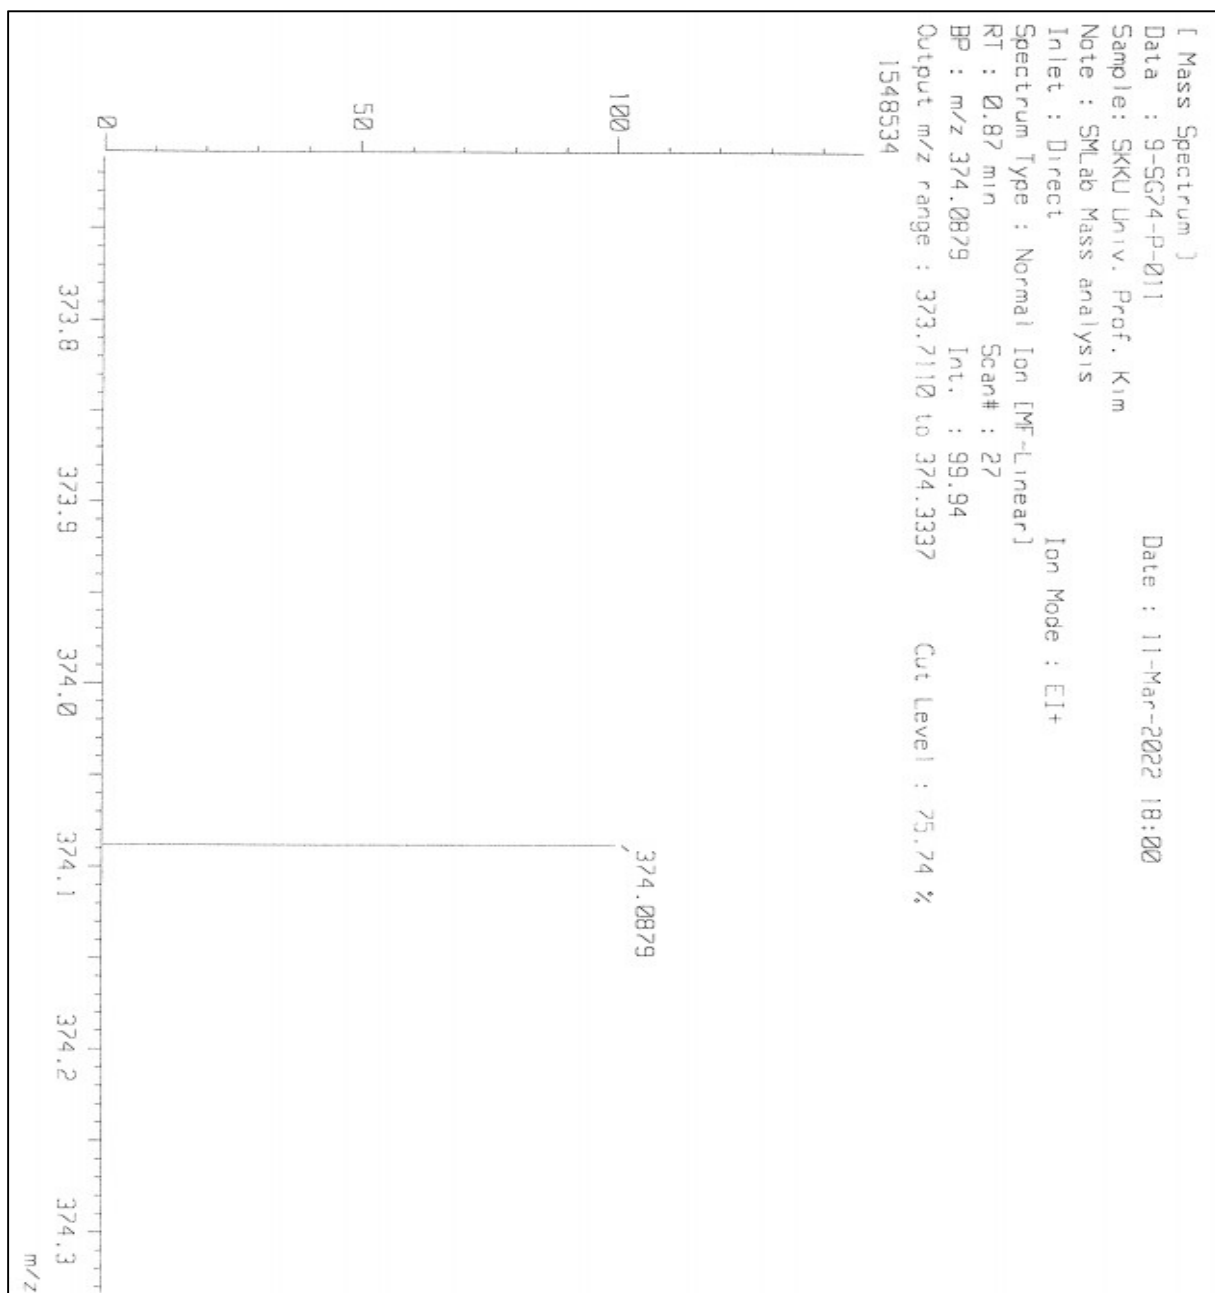

[ Elemental Composition ]

Data : HR-SG57-P-011  
 Sample: SKKU Univ. Prof. Kim  
 Note : SMLab Mass analysis

Date : 14-Feb-2022 11:38

Page: 1

3d

Inlet : Direct  
 RT : 1.50 min  
 Elements : C 20/0, H 15/0, O 4/0, N 2/0  
 Mass Tolerance : 1000ppm, 3mmu if m/z < 3, 5mmu if m/z > 5  
 Unsaturation (U.S.) : -0.5 - 70.0

Ion Mode : EI+  
 Scan#: (45,47)

| Observed m/z | Int%  | Err [ppm / mmu] | U.S. | Composition       |
|--------------|-------|-----------------|------|-------------------|
| 306.1002     | 100.0 | -0.7 / -0.2     | 13.0 | C 18 H 14 O 3 N 2 |

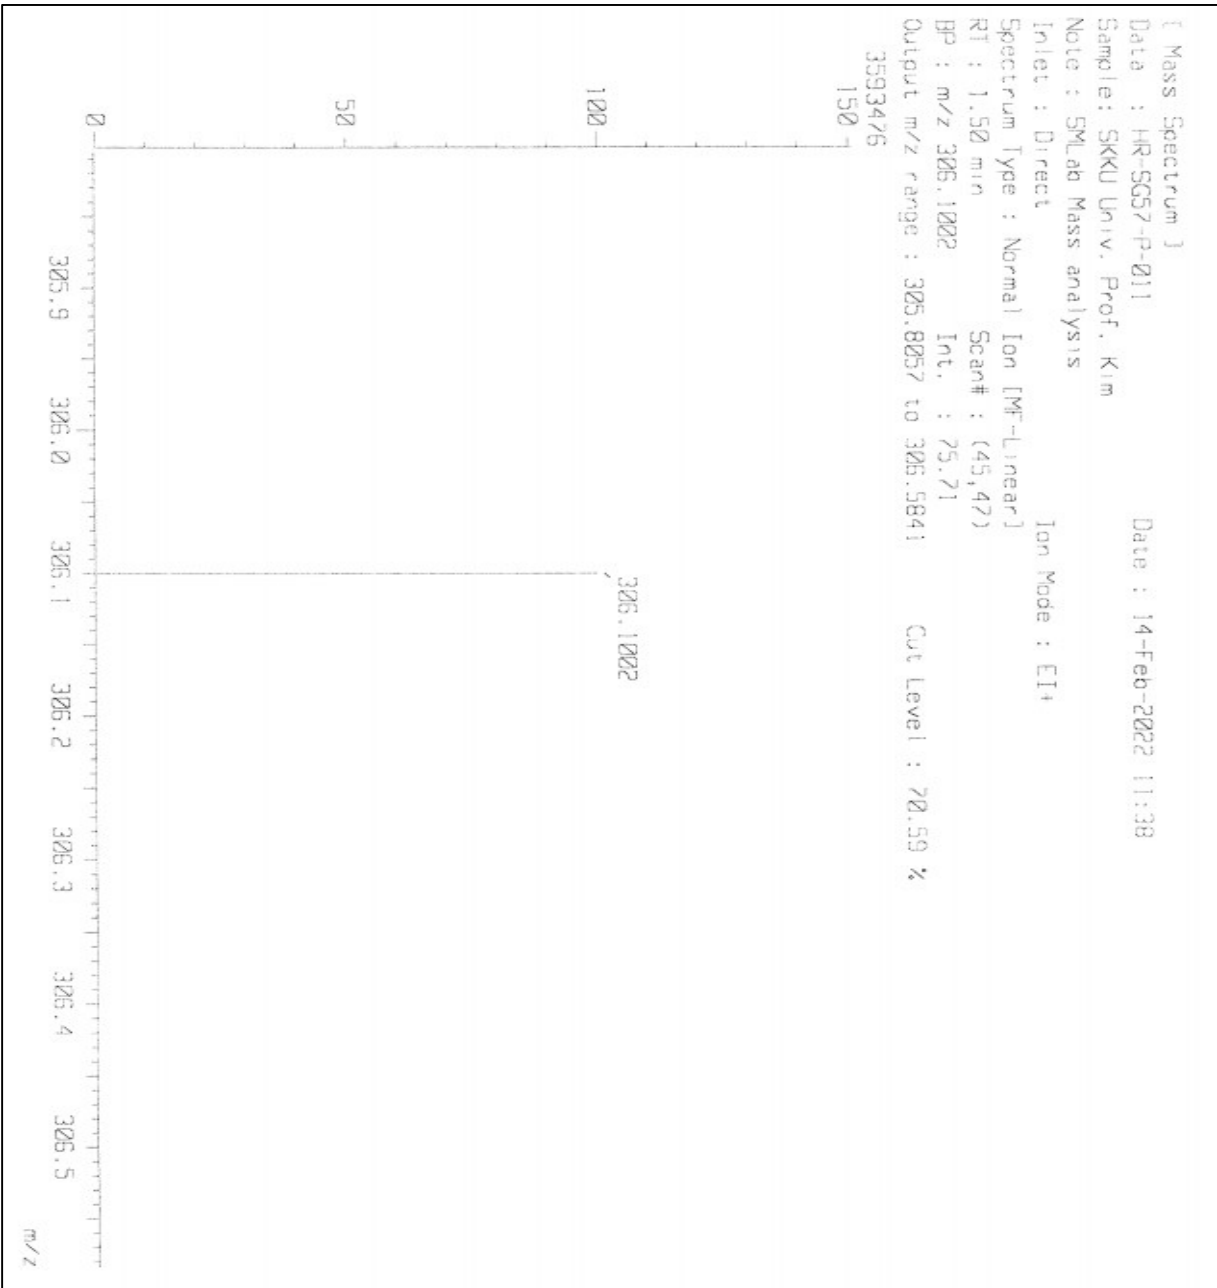

[ Elemental Composition ]

Data : 9-SG-82-P-015 Date : 03-Aug-2022 19:00  
Sample: SKKU Univ. prof. Kim  
Note : SMLab Mass analysis  
Inlet : Direct Ion Mode : EI+  
RT : 1.80 min Scan#: 55  
Elements : C 20/0, H 17/0, O 3/0, N 3/0  
Mass Tolerance : 1000ppm, 3mmu if m/z < 3, 5mmu if m/z > 5  
Unsaturation (U.S.) : -0.5 - 70.0

3e

| Observed m/z | Int%  | Err[ppm / mmu] | U.S. Composition       |
|--------------|-------|----------------|------------------------|
| 320.1160     | 100.0 | -0.3 / -0.1    | 13.0 C 19 H 16 O 3 N 2 |

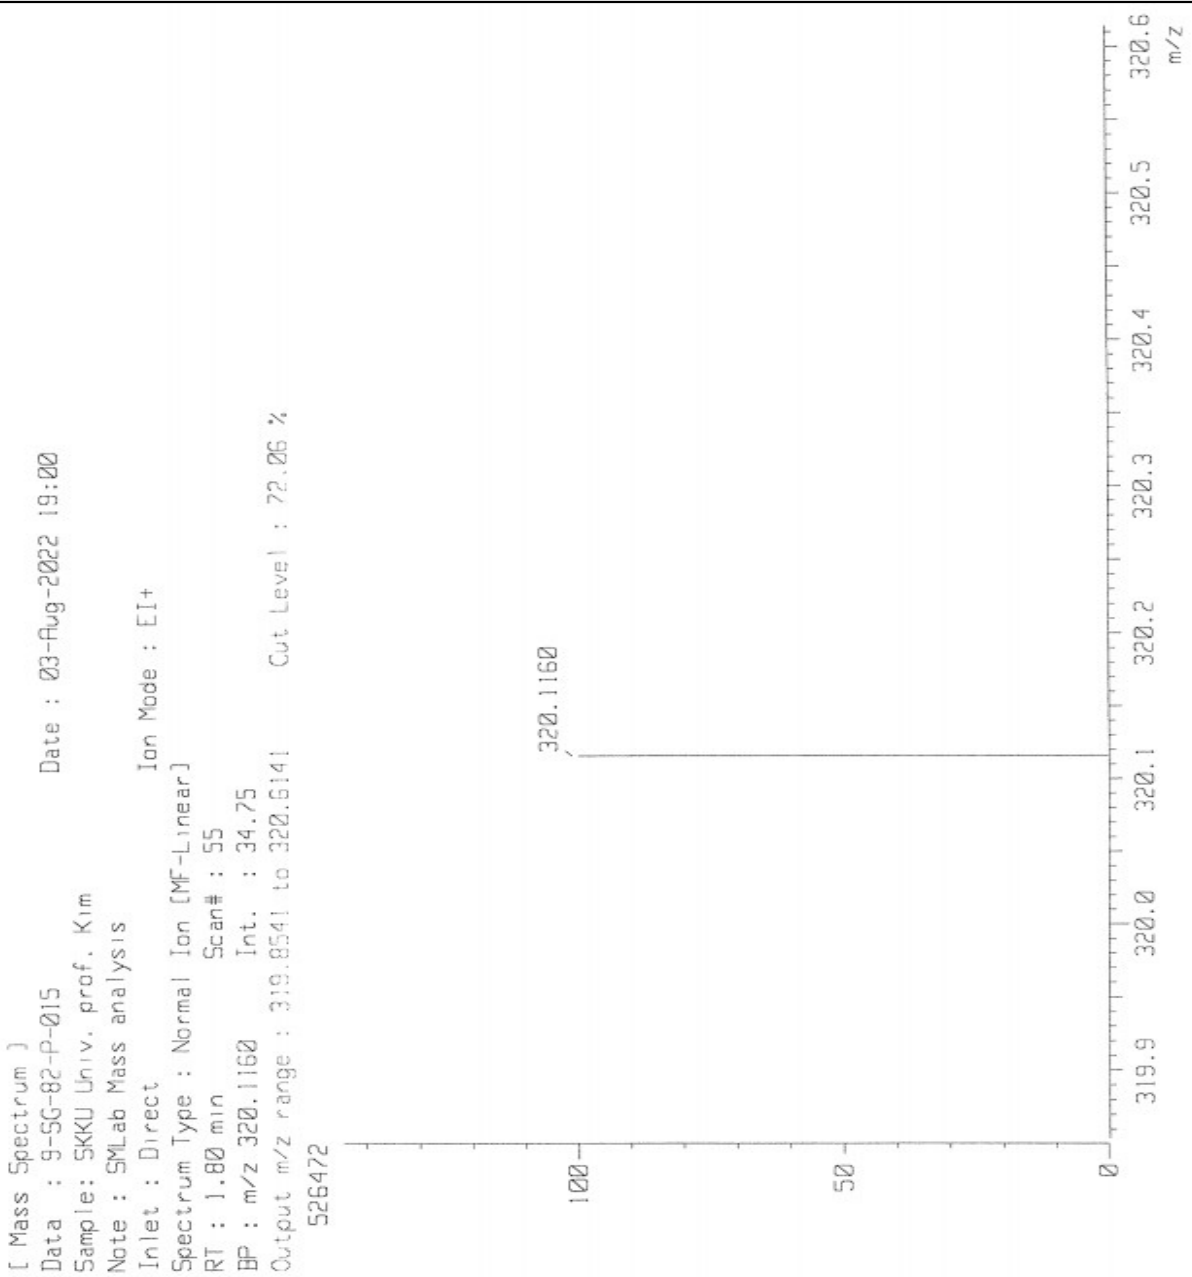

[ Elemental Composition ]

Data : 17-SG-80-P-024  
 Sample: SKKU Univ. Prof. Kim  
 Note : SMLab Mass analysis

Date : 25-May-2022 14:03

3f

Inlet : Direct Ion Mode : EI+  
 RT : 1.92 min Scan#: (54,63)  
 Elements : C 20/0, H 15/0, O 3/0, N 2/0, Cl 1/0  
 Mass Tolerance : 1000ppm, 3mmu if m/z < 3, 5mmu if m/z > 5  
 Unsaturation (U.S.) : -0.5 - 70.0

| Observed m/z | Int%  | Err[ppm / mmu] | U.S. | Composition          |
|--------------|-------|----------------|------|----------------------|
| 340.0612     | 100.0 | -0.8 / -0.3    | 13.0 | C 18 H 13 O 3 N 2 Cl |

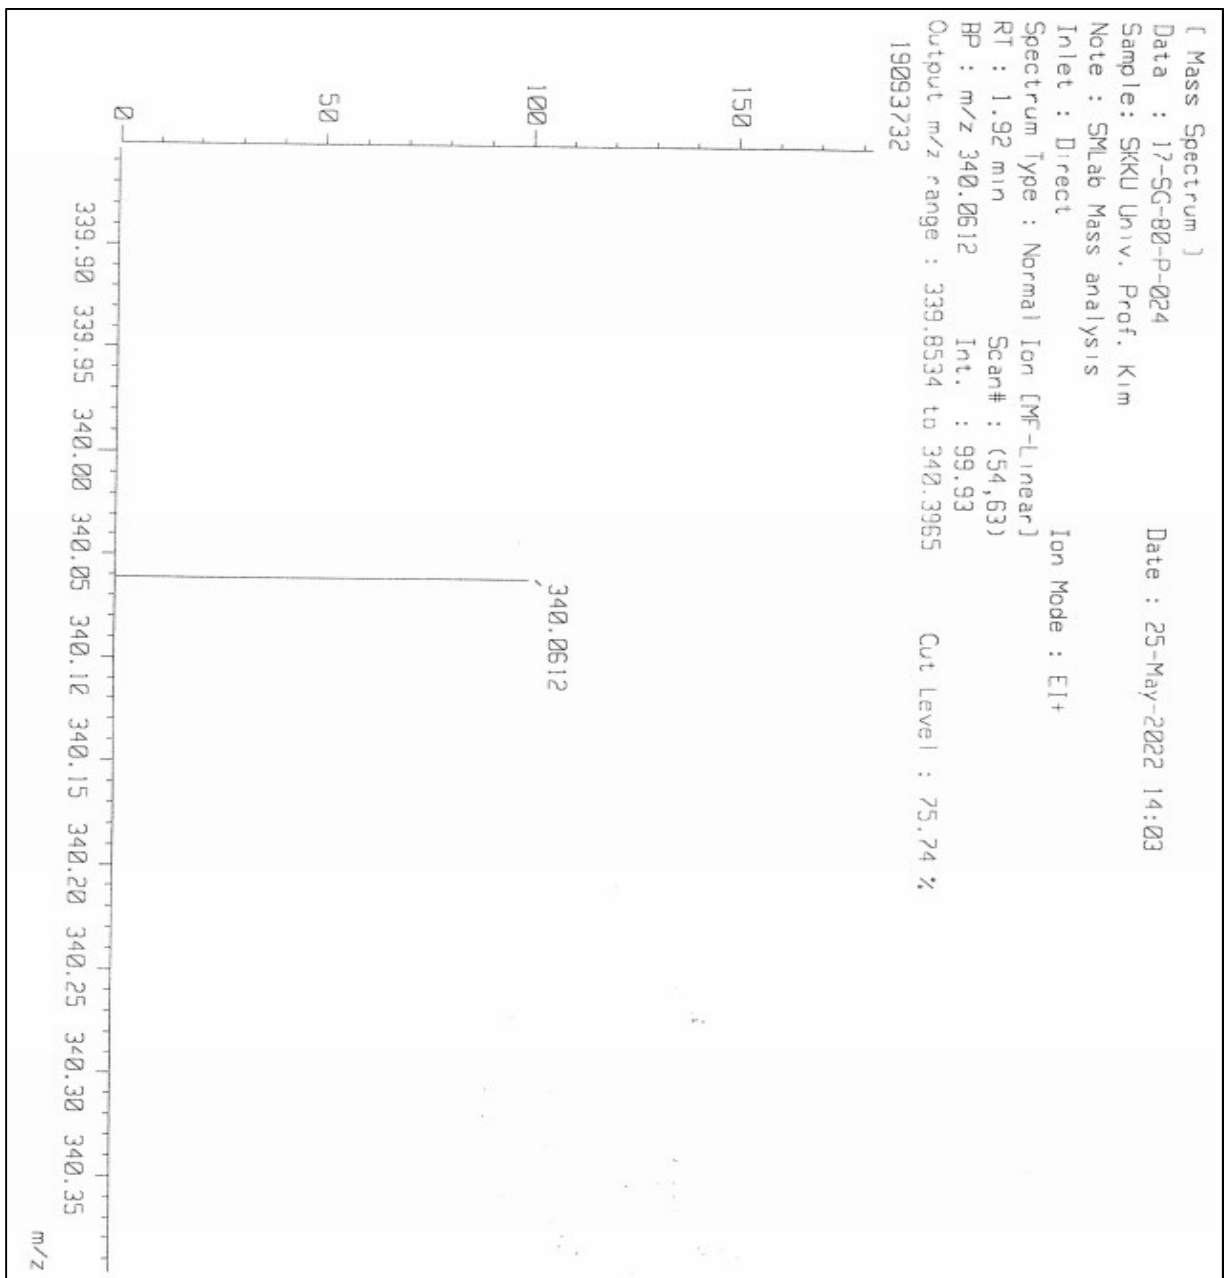

[ Elemental Composition ]

Data : 7-SG83-P-008  
Sample: SKKU Univ. Prof. Kim  
Note : SMLab Mass analysis

Date : 26-Mar-2022 08:42

3g

Inlet : Direct  
RT : 1.24 min  
Elements : C 20/0, H 16/0, O 3/0, N 3/0, Br 1/0  
Ion Mode : EI+  
Scan#: 38  
Mass Tolerance : 1000ppm, 3mmu if m/z < 3, 5mmu if m/z > 5  
Unsaturation (U.S.) : -0.5 - 70.0

| Observed m/z | Int%  | Err[ppm / mmu] | U.S. | Composition          |
|--------------|-------|----------------|------|----------------------|
| 384.0108     | 100.0 | -0.4 / -0.2    | 13.0 | C 18 H 13 O 3 N 2 Br |

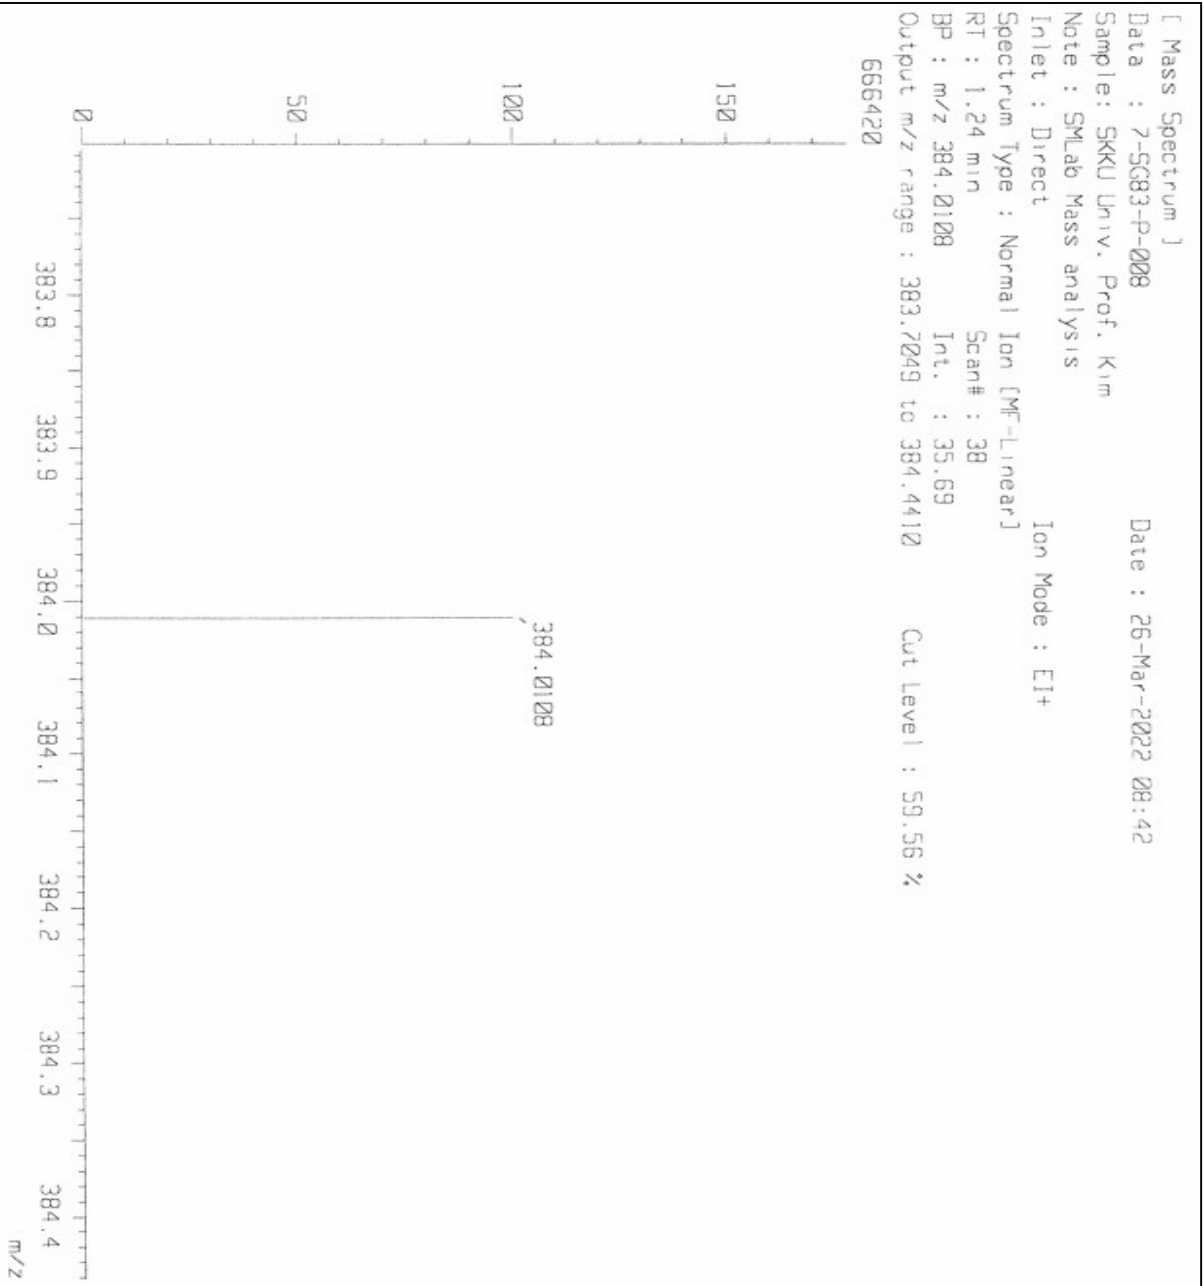

[ Elemental Composition ]

Data : 8-SG84-P-007  
 Sample: SKKU Univ. Prof. Kim  
 Note : SMLab Mass analysis

Date : 26-Mar-2022 08:37

3h

Inlet : Direct

Ion Mode : EI+

RT : 2.97 min

Scan#: 90

Elements : C 20/0, H 16/0, O 3/0, N 3/0

Mass Tolerance : 1000ppm, 3mmu if m/z < 3, 5mmu if m/z > 5

Unsaturation (U.S.) : -0.5 - 70.0

| Observed m/z | Int%  | Err [ppm / mmu] | U.S. | Composition       |
|--------------|-------|-----------------|------|-------------------|
| 320.1161     | 100.0 | +0.2 / +0.1     | 13.0 | C 19 H 16 O 3 N 2 |

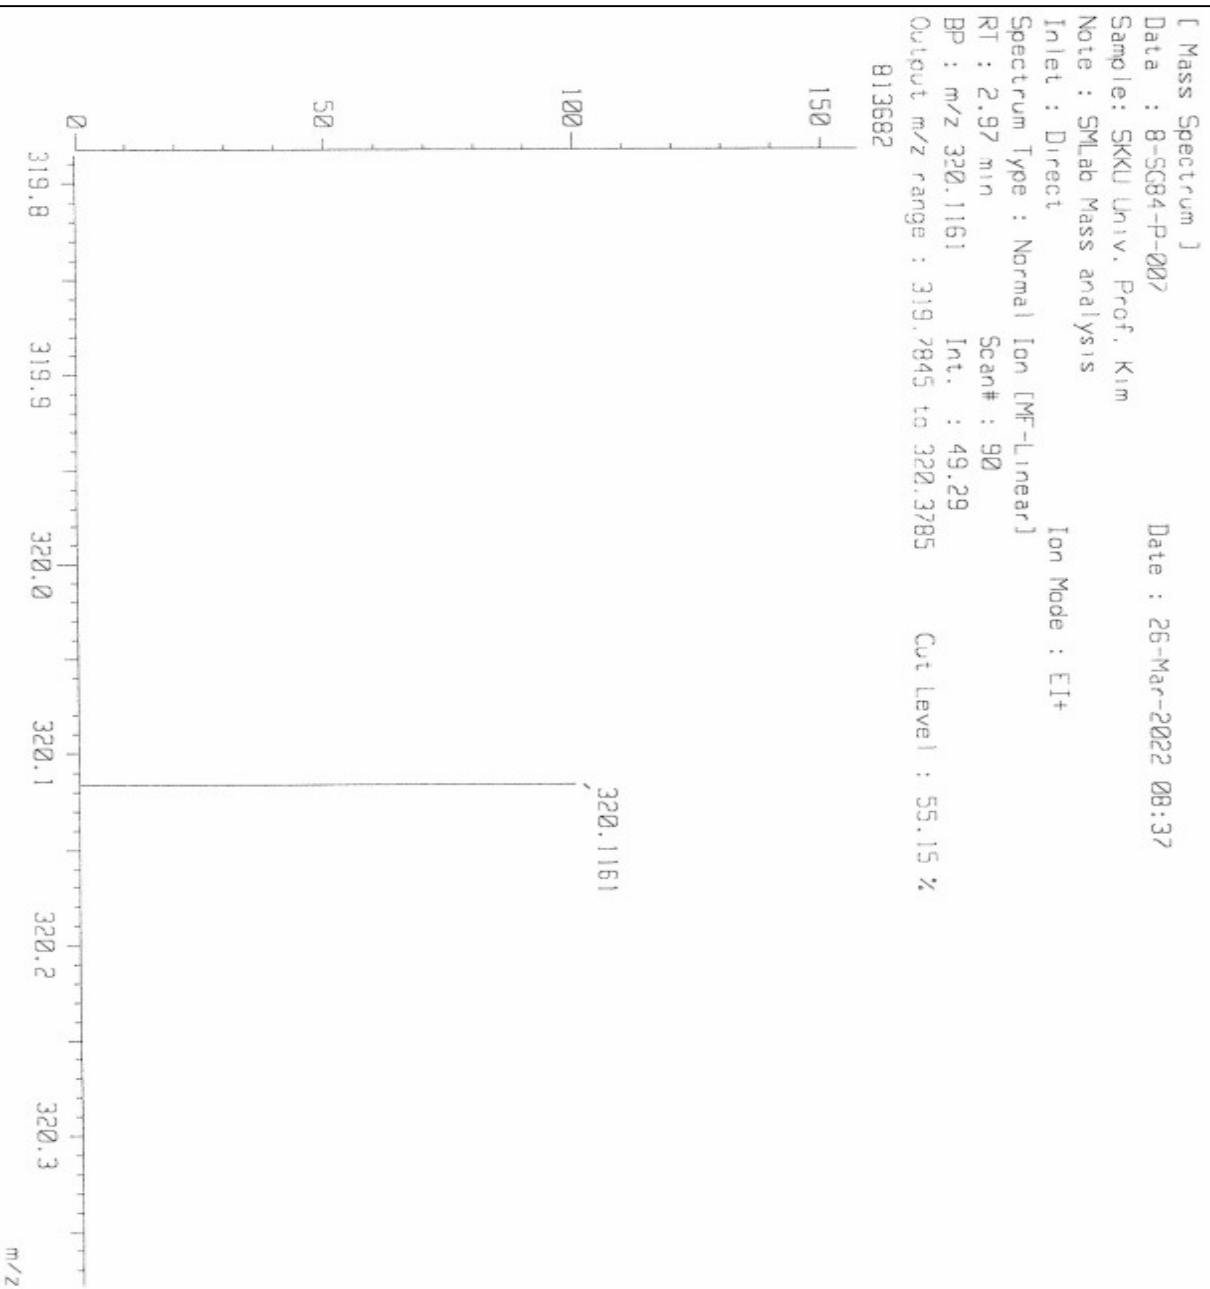

[ Elemental Composition ]

Data : 9-SG85-P-009 Date : 26-Mar-2022 08:44  
 Sample: SKKU Univ. Prof. Kim  
 Note : SMLab Mass analysis  
 Inlet : Direct Ion Mode : EI+  
 RT : 0.97 min Scan#: (26,34)  
 Elements : C 20/0, H 16/0, O 3/0, N 3/0, F 1/0  
 Mass Tolerance : 1000ppm, 3mmu if m/z < 3, 5mmu if m/z > 5  
 Unsaturation (U.S.) : -0.5 - 70.0

3i

| Observed m/z | Int%  | Err[ppm / mmu] | U.S. | Composition         |
|--------------|-------|----------------|------|---------------------|
| 324.0906     | 100.0 | -1.3 / -0.4    | 13.0 | C 18 H 13 O 3 N 2 F |

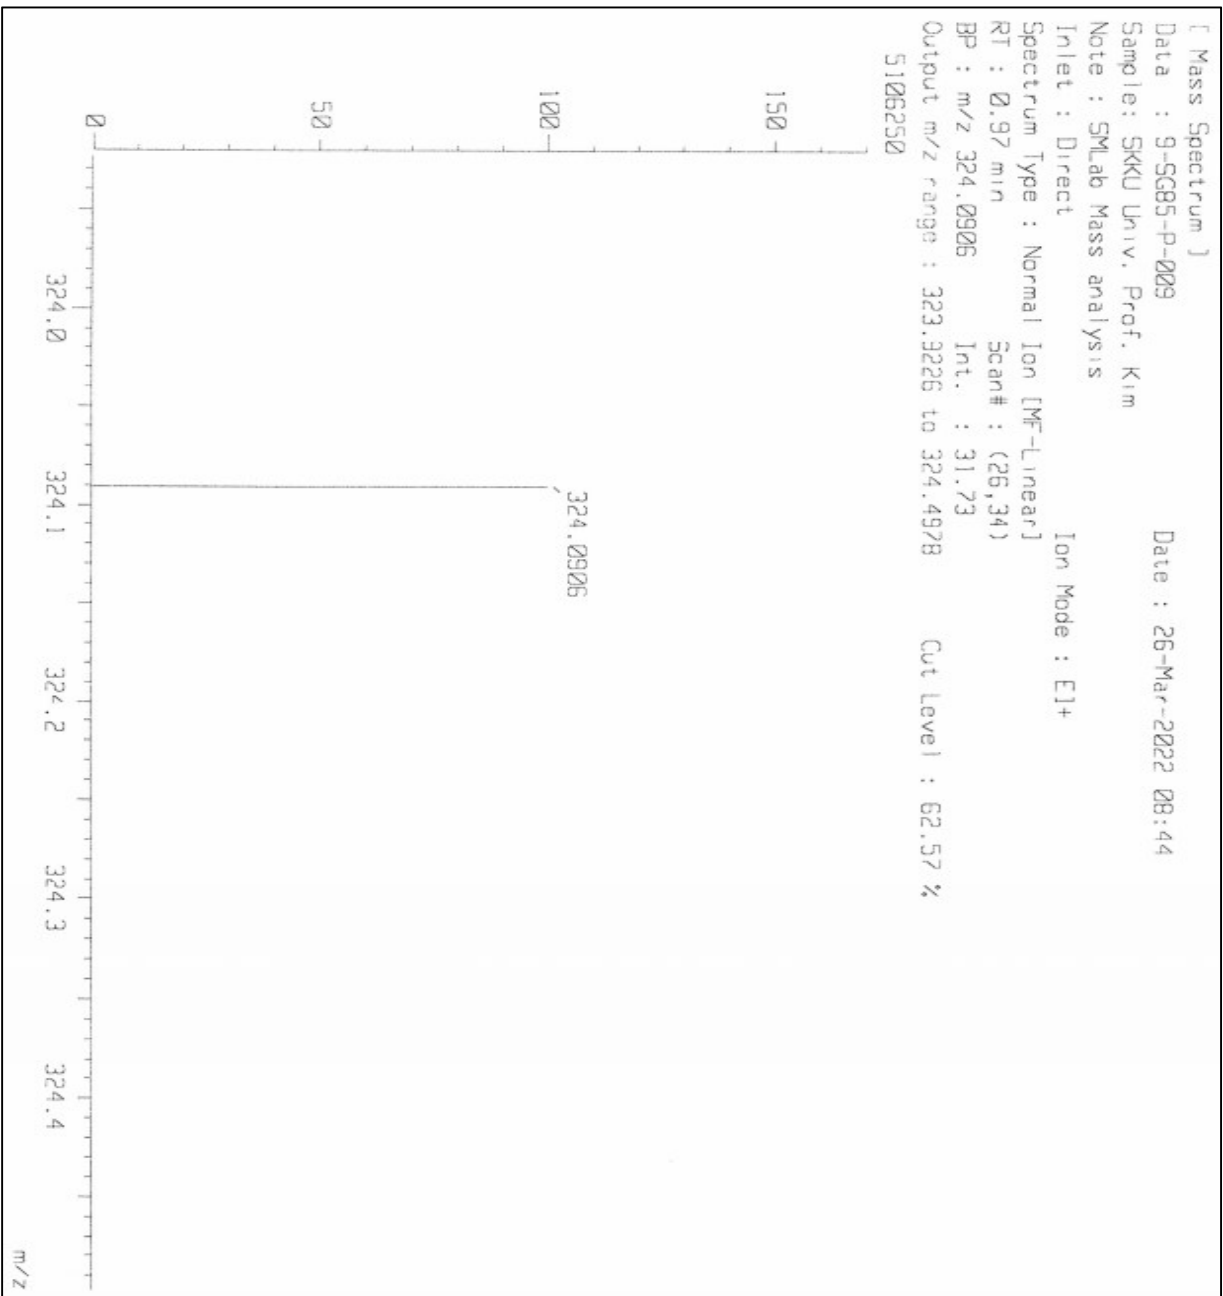

[ Elemental Composition ]

Data : 21-HR-SG108-P  
 Sample: SKKU Univ. Prof. Kim  
 Note : SMLab Mass analysis  
 Inlet : Direct  
 RT : 1.14 min  
 Elements : C 25/0, H 18/0, O 3/0, N 2/0  
 Mass Tolerance : 1000ppm, 3mmu if m/z < 3, 5mmu if m/z > 5  
 Unsaturation (U.S.) : -0.5 - 70.0

Date : 13-May-2022 13:47

3j

Ion Mode : EI+  
 Scan#: 35

| Observed m/z | Int% | Err [ppm / mmu] | U.S. | Composition       |
|--------------|------|-----------------|------|-------------------|
| 356.1157     | 68.9 | -1.2 / -0.4     | 16.0 | C 22 H 16 O 3 N 2 |

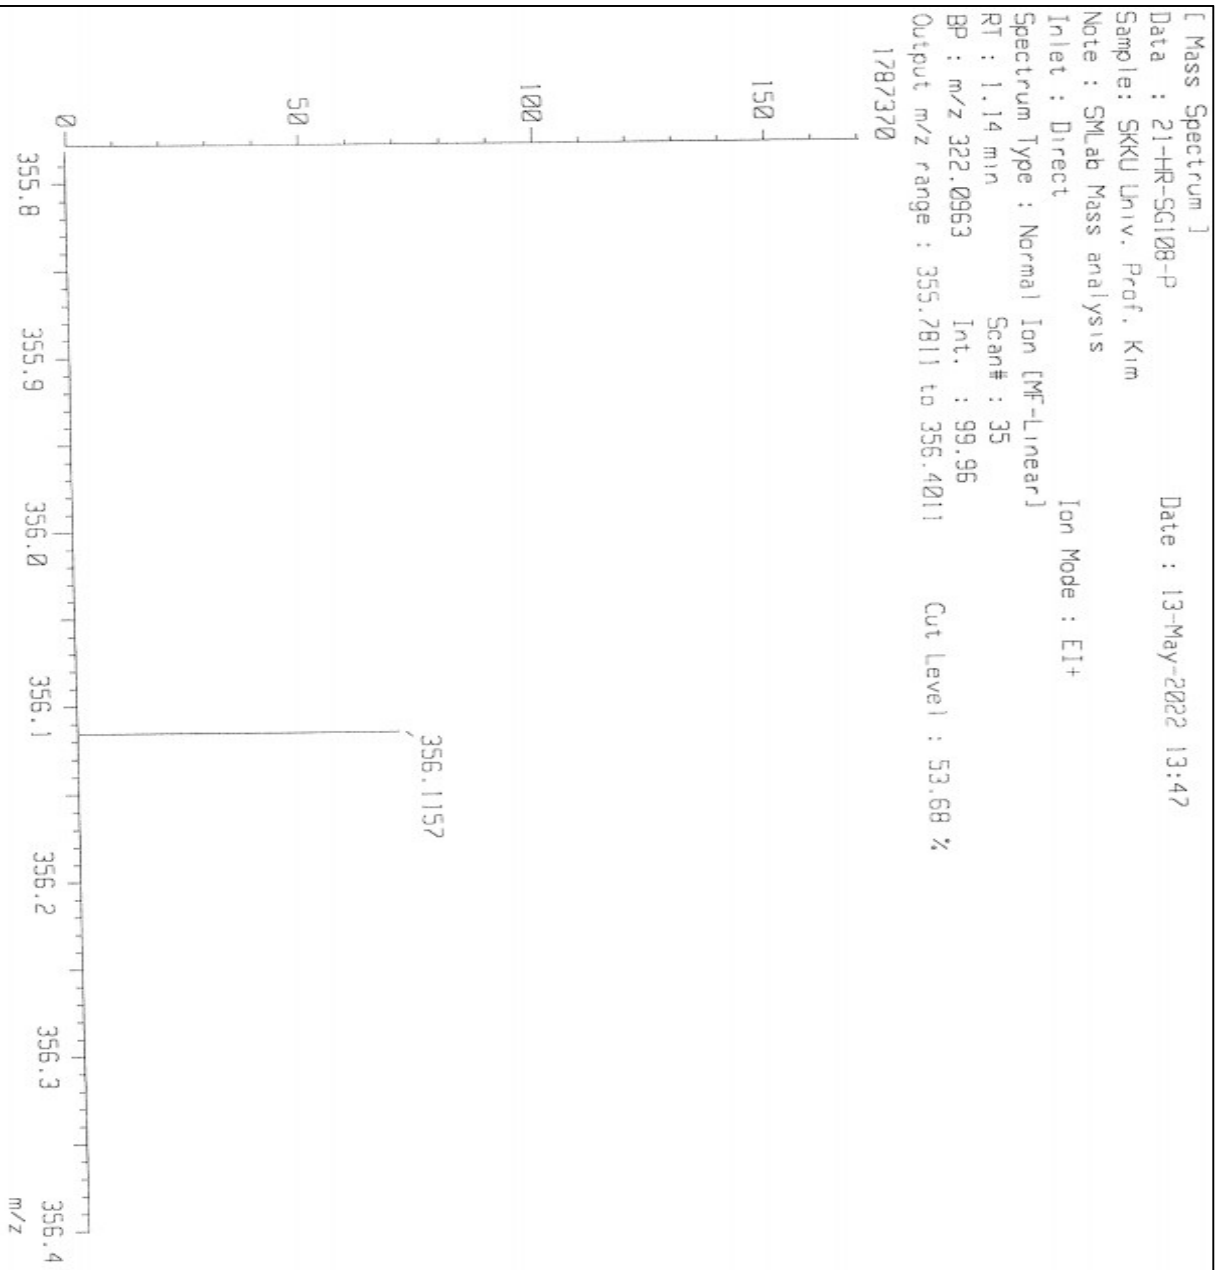



[ Elemental Composition ]

Data : 19-HE-CE39-P  
 Sample: SKKU Univ. Prof. Kim  
 Note : SMLab Mass analysis  
 Inlet : Direct

Date : 13-May-2022 13:42

3k

RT : 1.07 min

Ion Mode : EI+  
 Scan#: 33

Elements : C 30/0, H 20/0, O 3/0, N 3/0

Mass Tolerance : 1000ppm, 3mmu if m/z < 3, 5mmu if m/z > 5

Unsaturation (U.S.) : -0.5 - 70.0

| Observed m/z | Int% | Err[ppm / mmu] | U.S. | Composition       |
|--------------|------|----------------|------|-------------------|
| 430.1314     | 57.2 | -0.8 / -0.4    | 21.0 | C 28 H 18 O 3 N 2 |

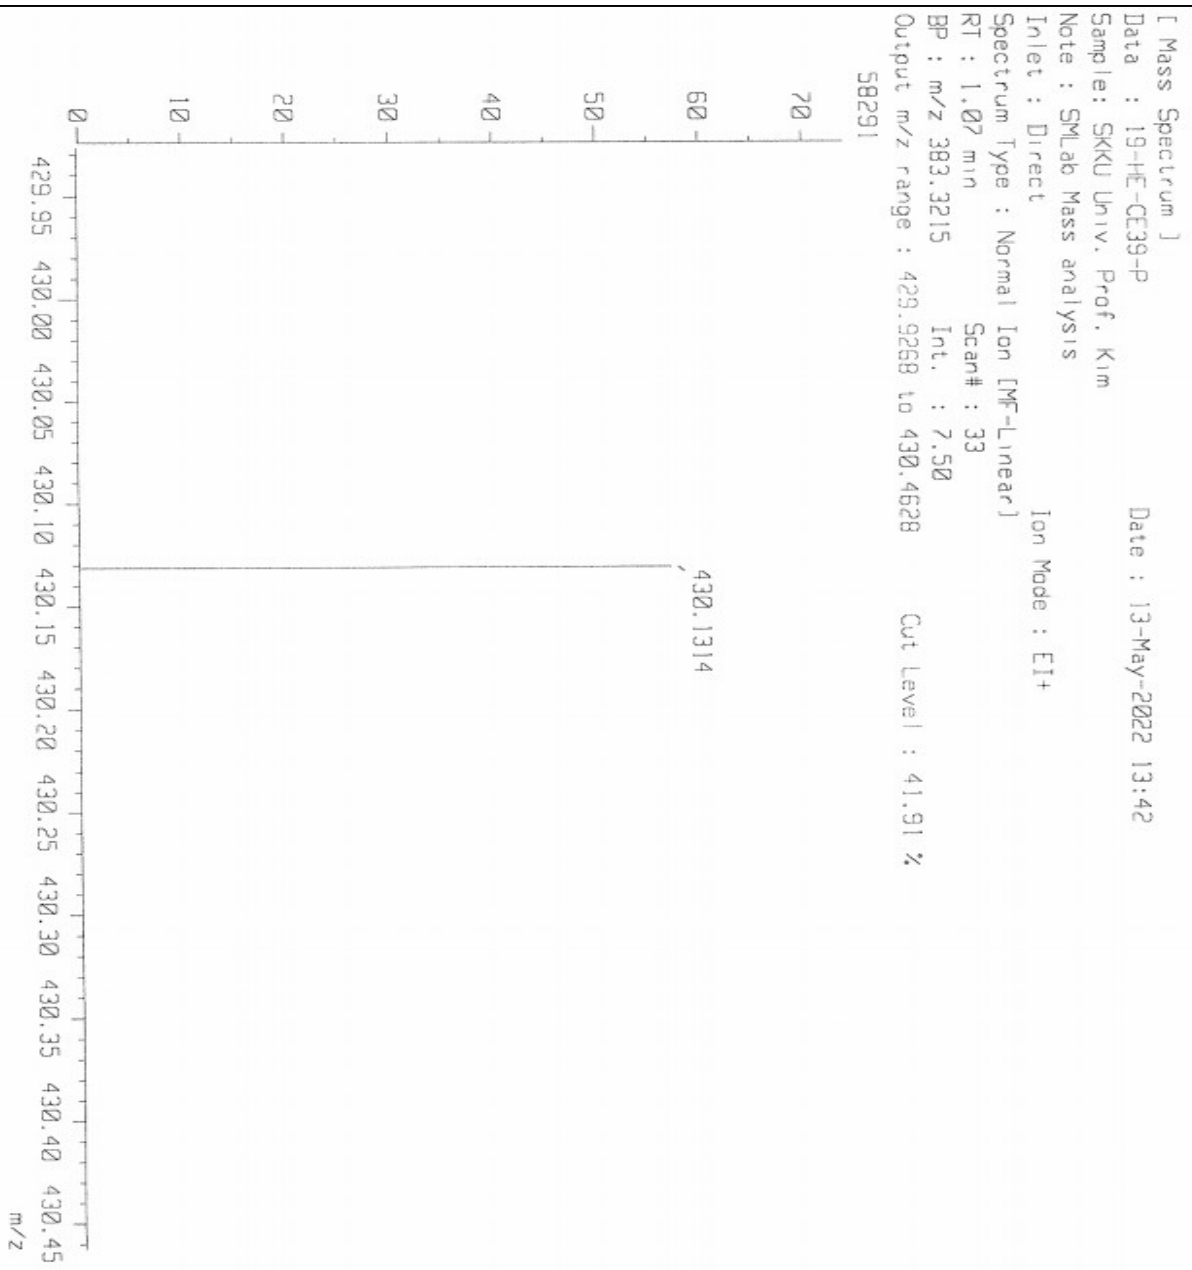

[ Elemental Composition ]

Data : 15-SG-101-P-022  
 Sample: SKKU Univ. Prof. Kim  
 Note : SMLab Mass analysis  
 Inlet : Direct  
 RT : 2.40 min  
 Elements : C 20/0, H 15/0, O 5/0, N 2/0  
 Mass Tolerance : 1000ppm, 3mmu if m/z < 3, 5mmu if m/z > 5  
 Unsaturation (U.S.) : -0.5 - 70.0

Date : 25-May-2022 13:57

Page: 1

31

Ion Mode : EI+  
 Scan#: (63,83)

| Observed m/z | Int%  | Err[ppm / mmu] | U.S. | Composition       |
|--------------|-------|----------------|------|-------------------|
| 350.0901     | 100.0 | -0.4 / -0.2    | 14.0 | C 19 H 14 O 5 N 2 |

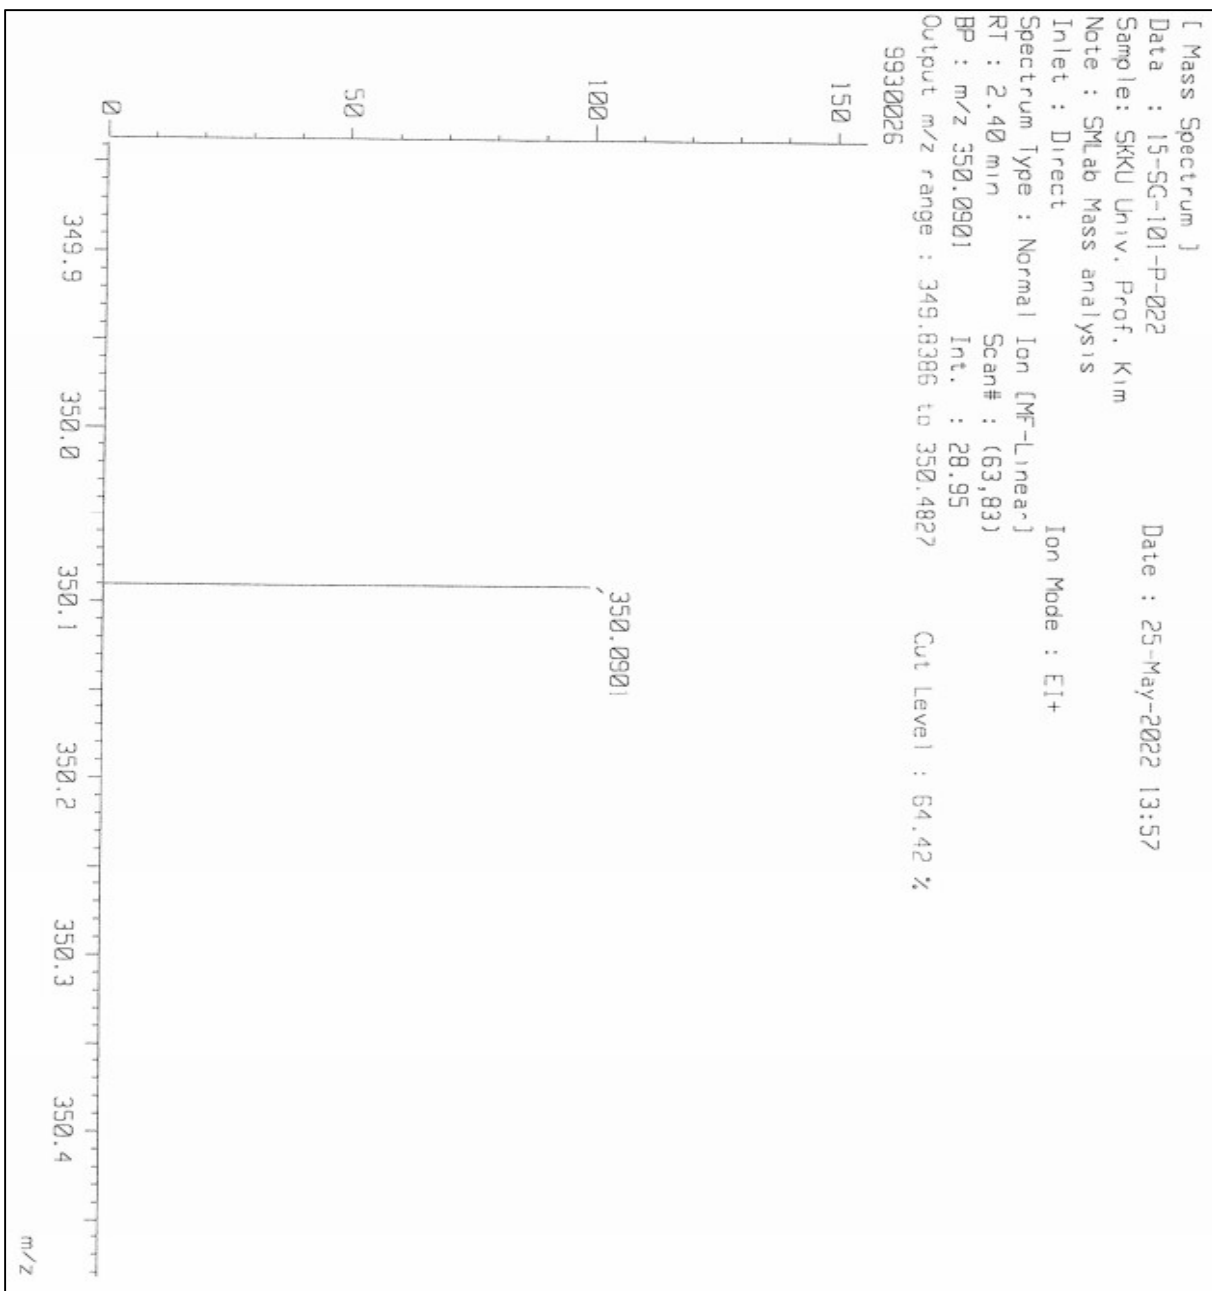

[ Elemental Composition ]

Data : 16-SG-91-P-023  
 Sample: SKKU Univ. Prof. Kim  
 Note : SMLab Mass analysis

Date : 25-May-2022 14:00

Page: 1

3m

Inlet : Direct

Ion Mode : EI+

RT : 1.77 min

Scan#: 54+48+38+42

Elements : C 23/0, H 20/0, O 3/0, N 3/0

Mass Tolerance : 1000ppm, 3mmu if m/z < 3, 5mmu if m/z > 5

Unsaturation (U.S.) : -0.5 - 70.0

| Observed m/z | Int%  | Err[ppm / mmu] | U.S. | Composition       |
|--------------|-------|----------------|------|-------------------|
| 359.1270     | 100.0 | +0.1 / +0.0    | 15.0 | C 21 H 17 O 3 N 3 |

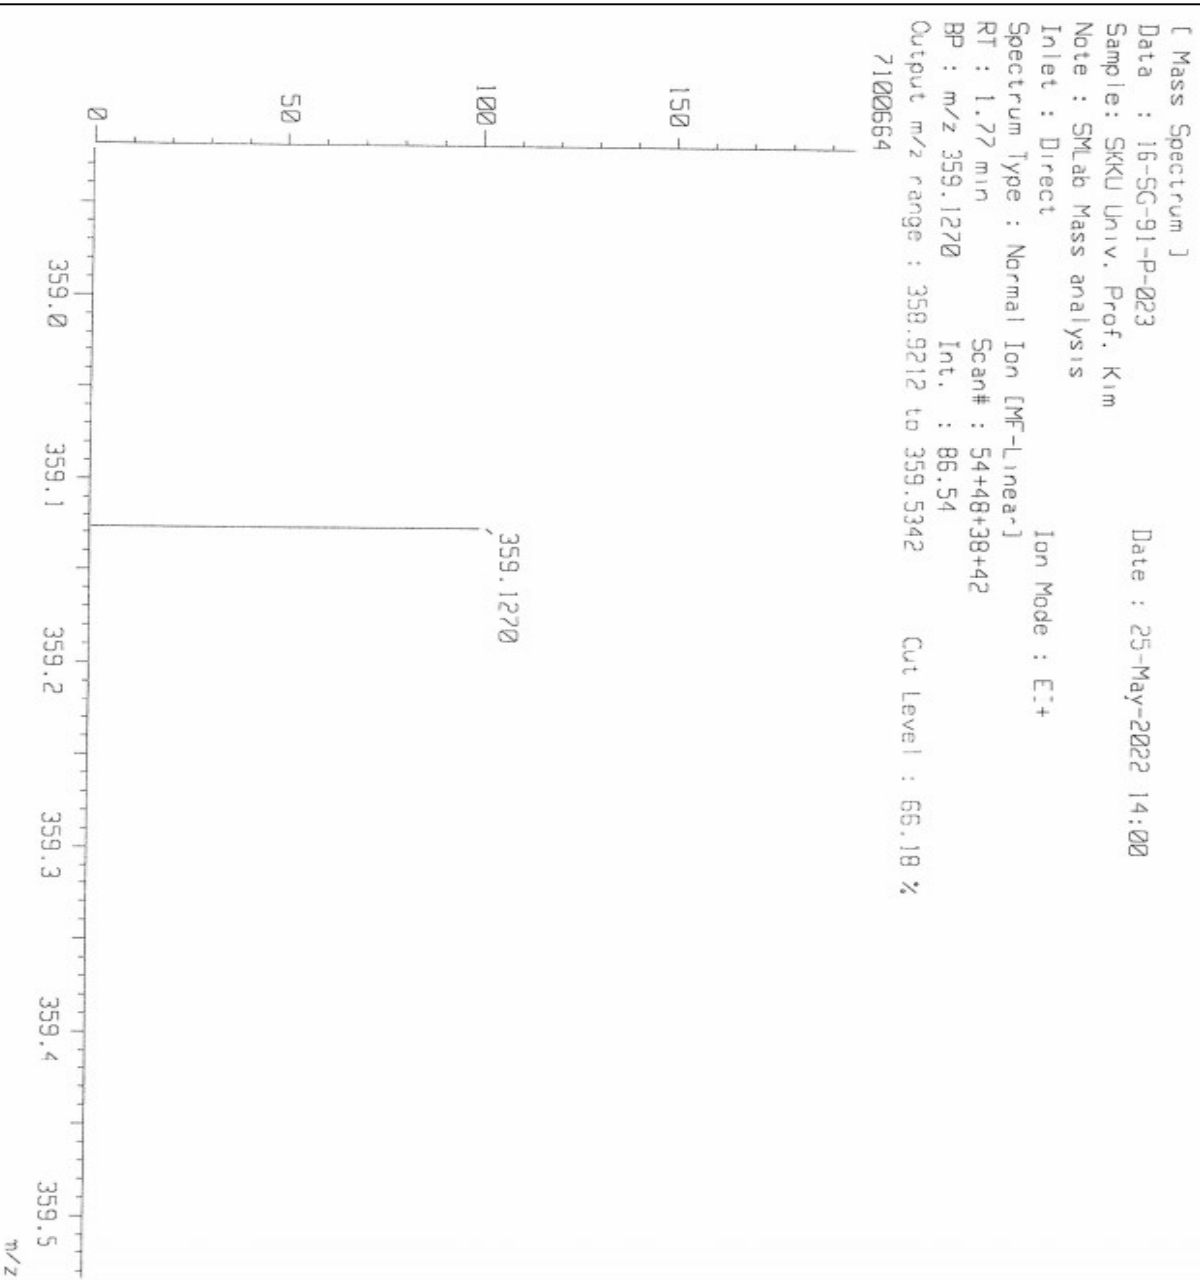

[ Elemental Composition ]

Data : 18-SG-97-re-P2-025 Date : 25-May-2022 14:06  
 Sample: SKKU Univ. Prof. Kim  
 Note : SMLab Mass analysis  
 Inlet : Direct Ion Mode : EI+  
 RT : 1.47 min Scan#: 45+60+61+65+61  
 Elements : C 18/0, H 15/0, O 4/0, N 2/0  
 Mass Tolerance : 1000ppm, 3mmu if m/z < 3, 5mmu if m/z > 5  
 Unsaturation (U.S.) : -0.5 - 70.0

3n

| Observed m/z | Int% | Err[ppm / mmu] | U.S. | Composition       |
|--------------|------|----------------|------|-------------------|
| 296.0796     | 35.9 | -0.4 / -0.1    | 12.0 | C 16 H 12 O 4 N 2 |

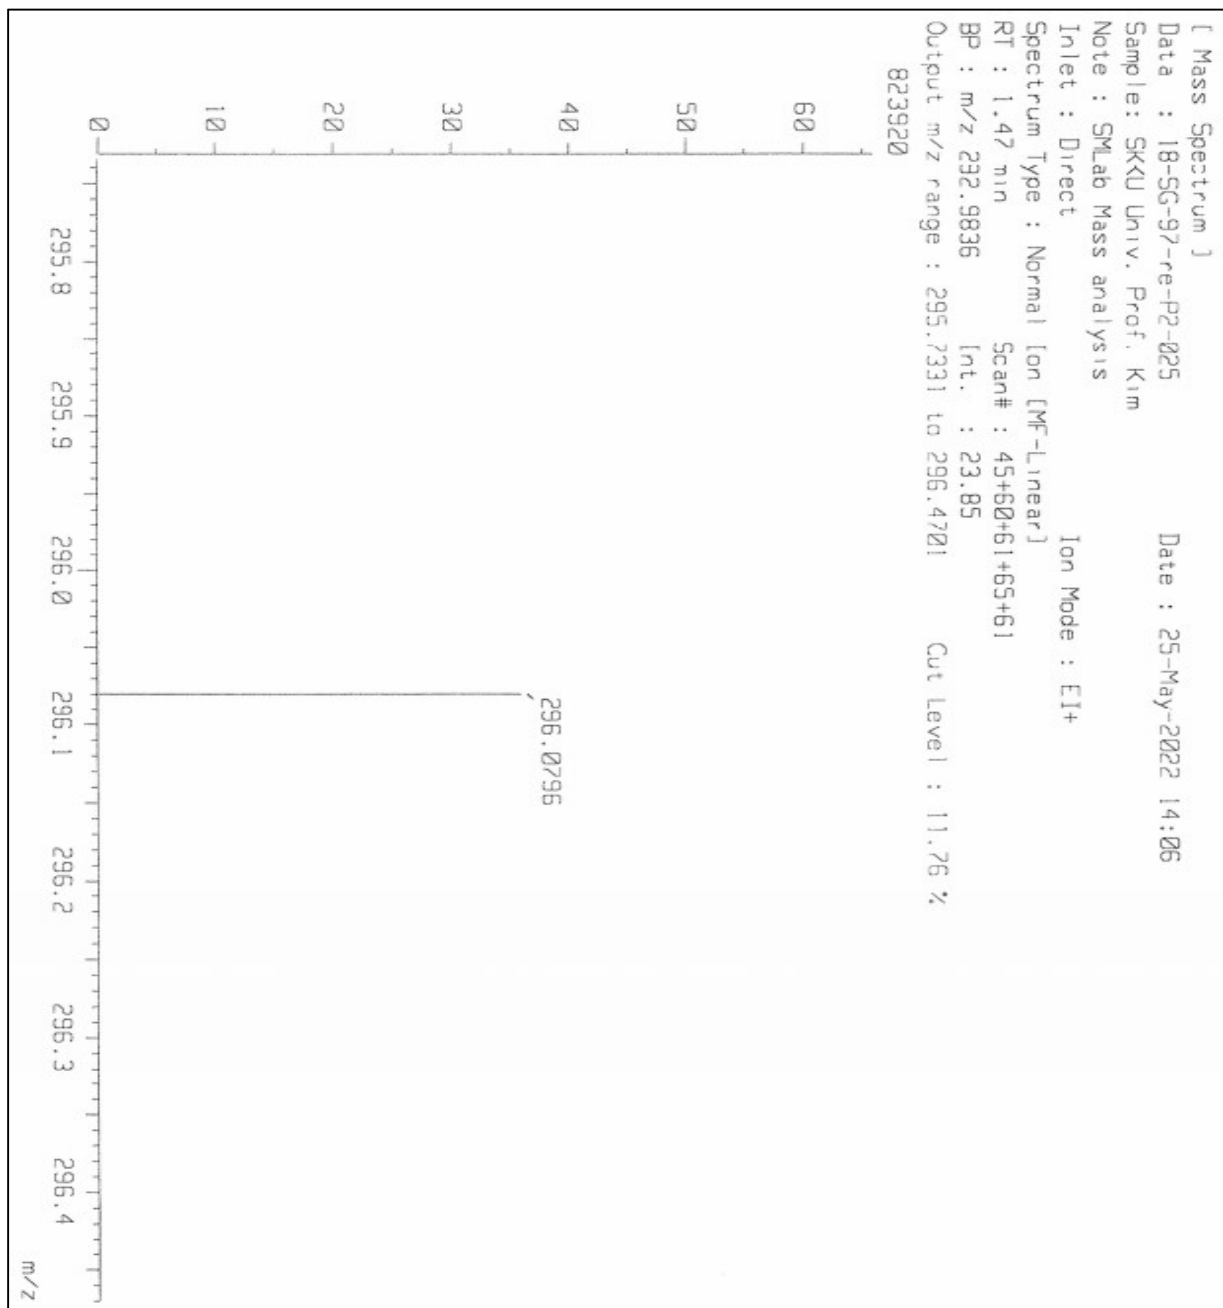

[ Elemental Composition ]

Data : 18-CE90-P-016

Date : 08-Oct-2022 14:25

Page: 1

Sample: SKKU. Univ. Prof. Kim

Note : SMLab Mass analysis

Inlet : Direct

Ion Mode : EI+

RT : 3.60 min

Scan#: (102,116)

Elements : C 17/0, H 14/0, O 3/0, N 2/0, S 1/0

Mass Tolerance : 1000ppm, 3mmu if m/z < 3, 10mmu if m/z > 10

Unsaturation (U.S.) : -0.5 - 70.0

30

| Observed m/z | Int%  | Err [ppm / mmu] | U.S. Composition         |
|--------------|-------|-----------------|--------------------------|
| 312.0566     | 100.0 | -0.9 / -0.3     | 13.0 C 16 H 12 O 3 N 2 S |

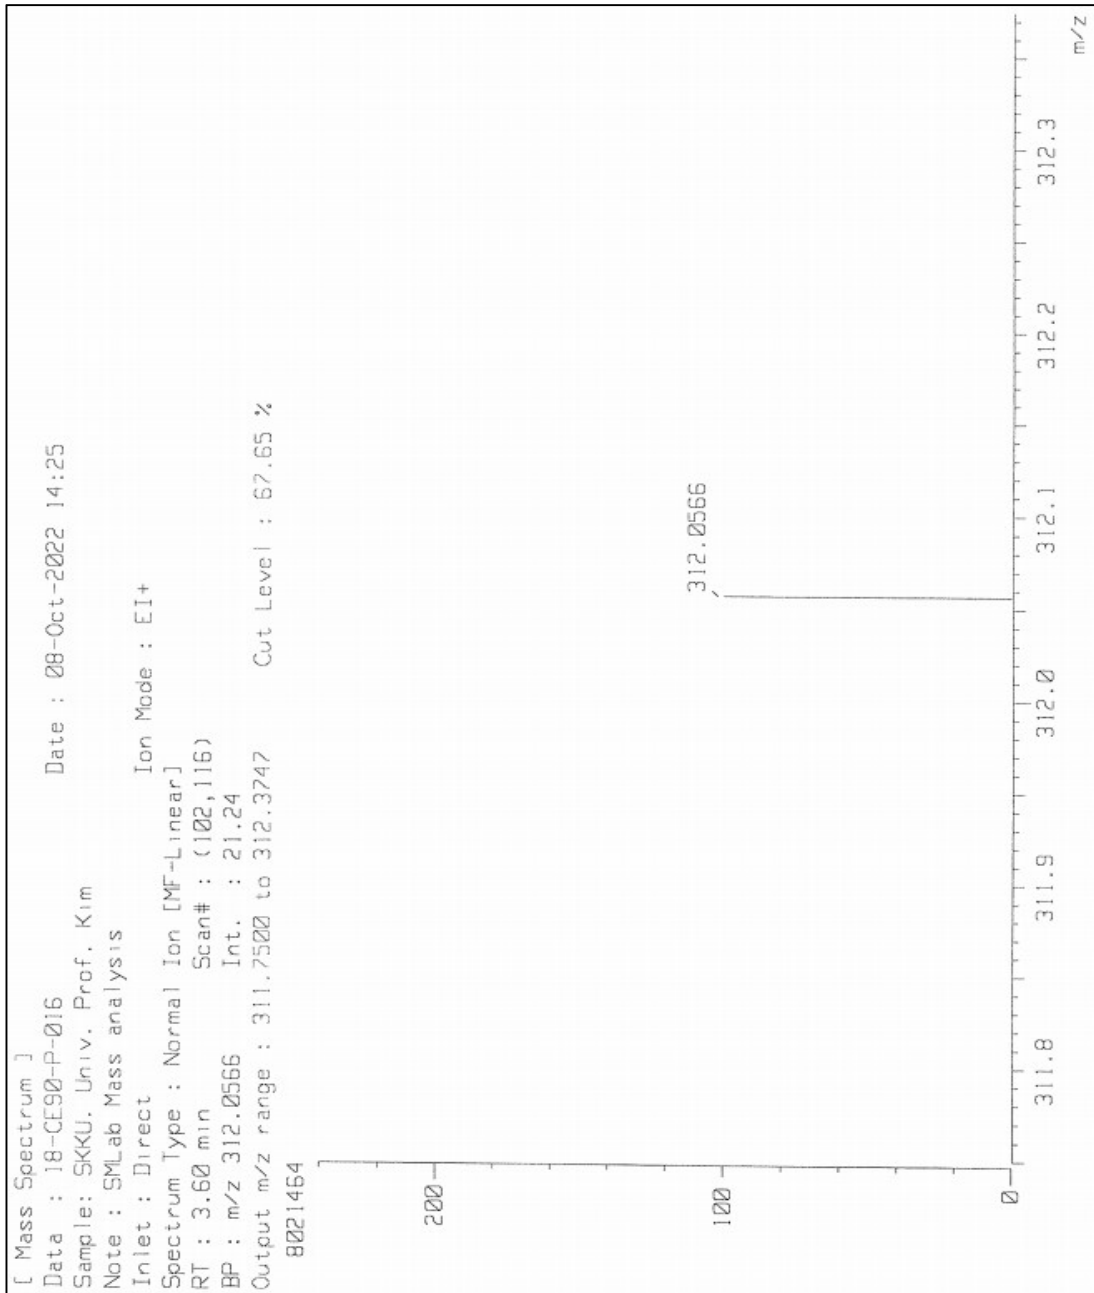

[ Elemental Composition ] Page: 1  
 Data : 3-CE-103-P-003 Date : 31-Oct-2022 16:43  
 Sample: SKKU. Univ. Prof. Kim  
 Note : SMLab Mass analysis 3q  
 Inlet : Direct Ion Mode : EI+  
 RT : 2.02 min Scan#: (61,62)+59+57  
 Elements : C 16/0, H 15/0, O 3/0, N 3/0  
 Mass Tolerance : 1000ppm, 3mmu if m/z < 3, 10mmu if m/z > 10  
 Unsaturation (U.S.) : -0.5 - 70.0

| Observed m/z | Int%  | Err[ppm / mmu] | U.S. | Composition       |
|--------------|-------|----------------|------|-------------------|
| 270.1001     | 100.0 | -1.3 / -0.3    | 10.0 | C 15 H 14 O 3 N 2 |

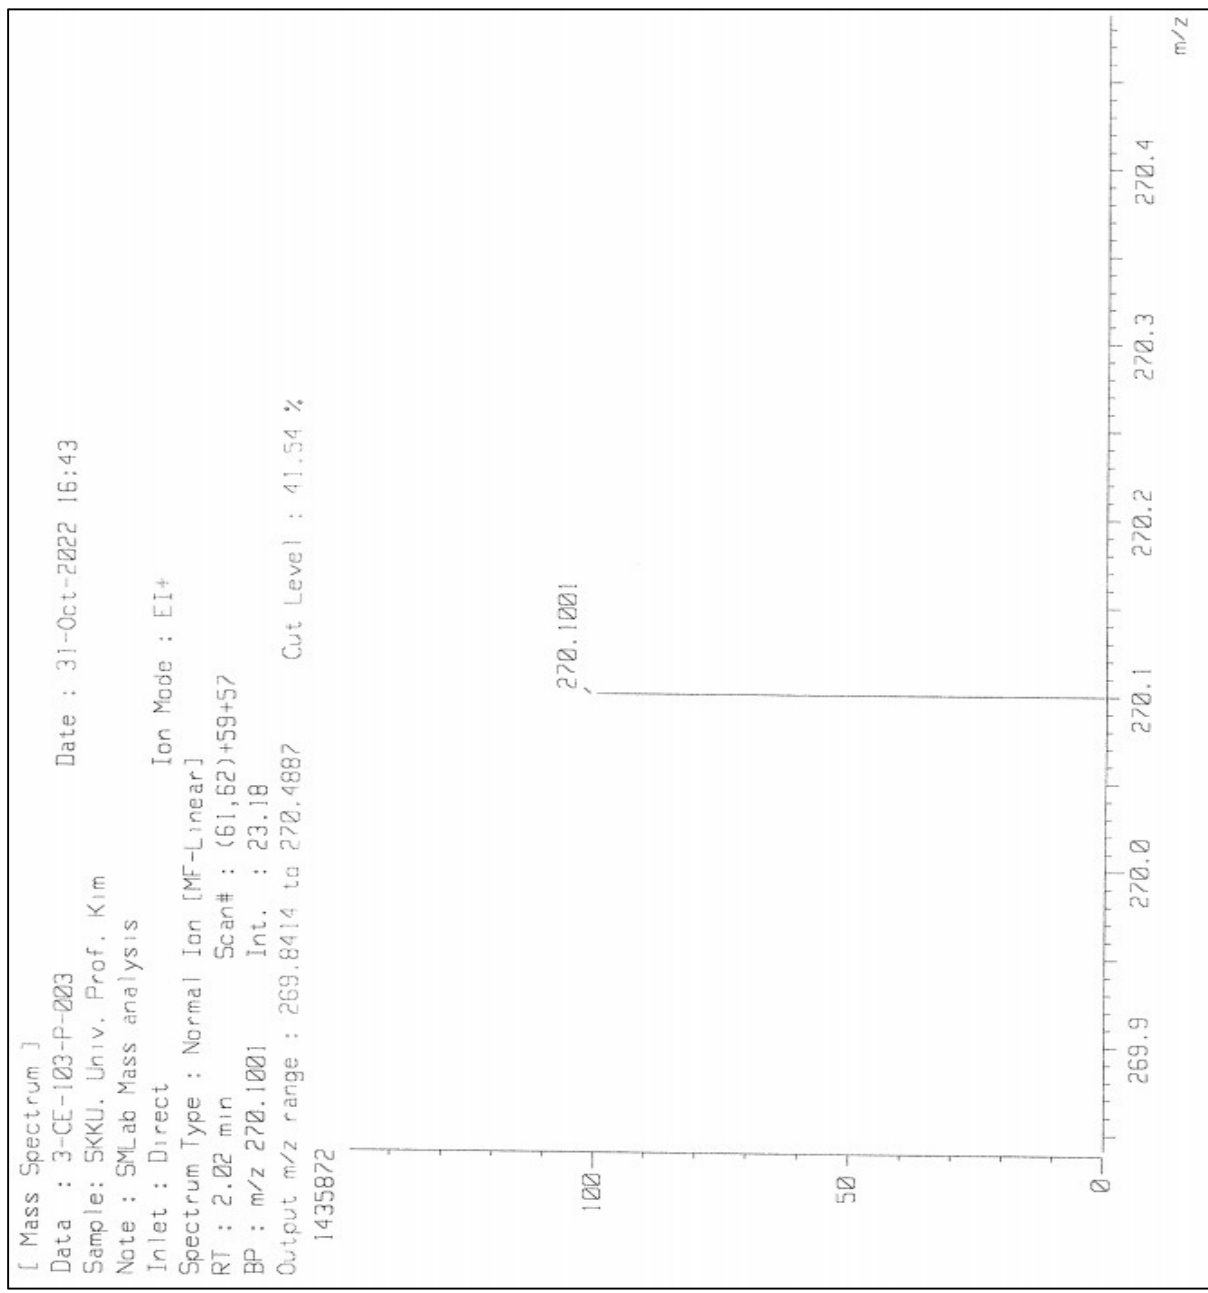

[ Elemental Composition ]

Data : 7-YV703-P-008  
Sample: SKKU. Univ. Prof. Kim  
Note : SMLab Mass analysis  
Inlet : Direct  
RT : 1.60 min  
Elements : C 20/0, H 21/0, O 3/0, N 3/0  
Mass Tolerance : 1000ppm, 3mmu if m/z < 3, 10mmu if m/z > 10  
Unsaturation (U.S.) : -0.5 - 70.0

Date : 31-Oct-2022 17:02

Ion Mode : EI+  
Scan#: 49+47

3r

| Observed m/z | Int%  | Err[ppm / mmu] | U.S. Composition       |
|--------------|-------|----------------|------------------------|
| 310.1315     | 100.0 | -0.7 / -0.2    | 11.0 C 18 H 18 O 3 N 2 |

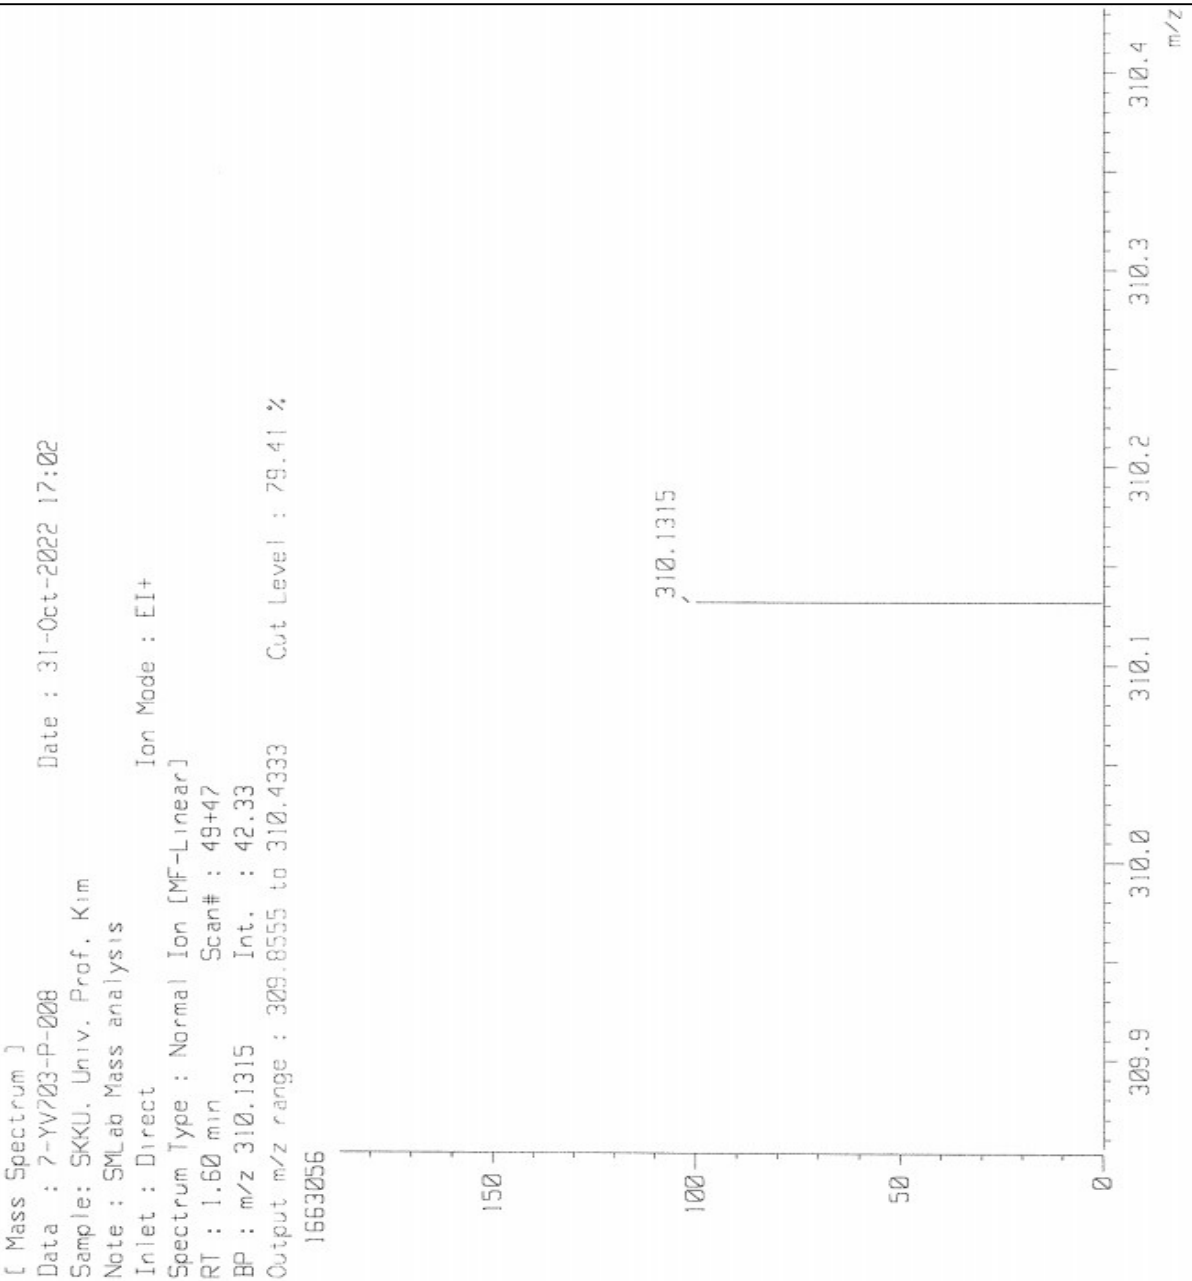

[ Elemental Composition ]

Data : 20-SG87-P-020  
 Sample: SKKU Univ. Prof. Kim  
 Note : SMLab Mass analysis

Date : 30-Mar-2022 14:45

Page: 1

3s

Inlet : Direct Ion Mode : EI+  
 RT : 1.40 min Scan#: (37,49)  
 Elements : C 22/0, H 22/0, O 3/0, N 2/0  
 Mass Tolerance : 1000ppm, 3mmu if m/z < 3, 5mmu if m/z > 5  
 Unsaturation (U.S.) : -0.5 - 70.0

| Observed m/z | Int%  | Err[ppm / mmu] | U.S. | Composition       |
|--------------|-------|----------------|------|-------------------|
| 336.1469     | 100.0 | -1.3 / -0.5    | 12.0 | C 20 H 20 O 3 N 2 |

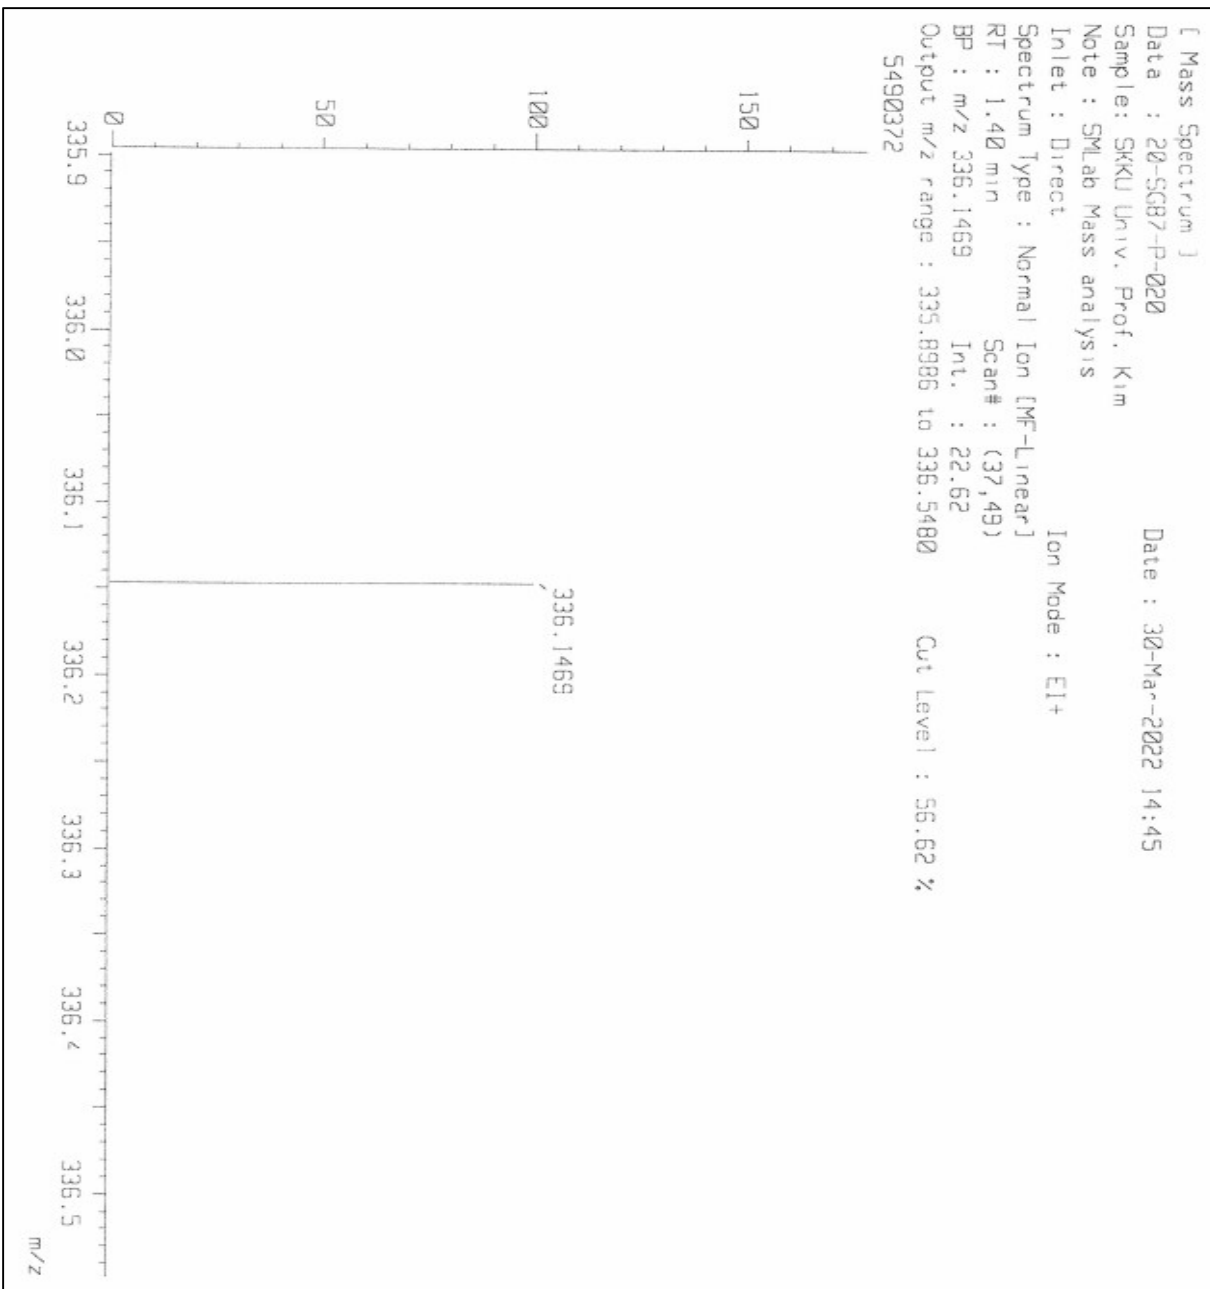



[ Elemental Composition ]

Data : 26-MS-274-7-P1-033  
Sample: SKKU Univ. Prof. Kim  
Note : SMLab Mass analysis

Date : 25-May-2022 14:30

Page: 1

3t

Inlet : Direct  
RT : 1.62 min

Ion Mode : EI+  
Scan#: (47,52)

Elements : C 20/0, H 20/0, O 3/0, N 2/0

Mass Tolerance : 1000ppm, 3mmu if m/z < 3, 5mmu if m/z > 5

Unsaturation (U.S.) : -0.5 - 70.0

| Observed m/z | Int% | Err [ppm / mmu] | U.S. | Composition       |
|--------------|------|-----------------|------|-------------------|
| 308.1160     | 54.9 | -0.4 / -0.1     | 12.0 | C 18 H 16 O 3 N 2 |

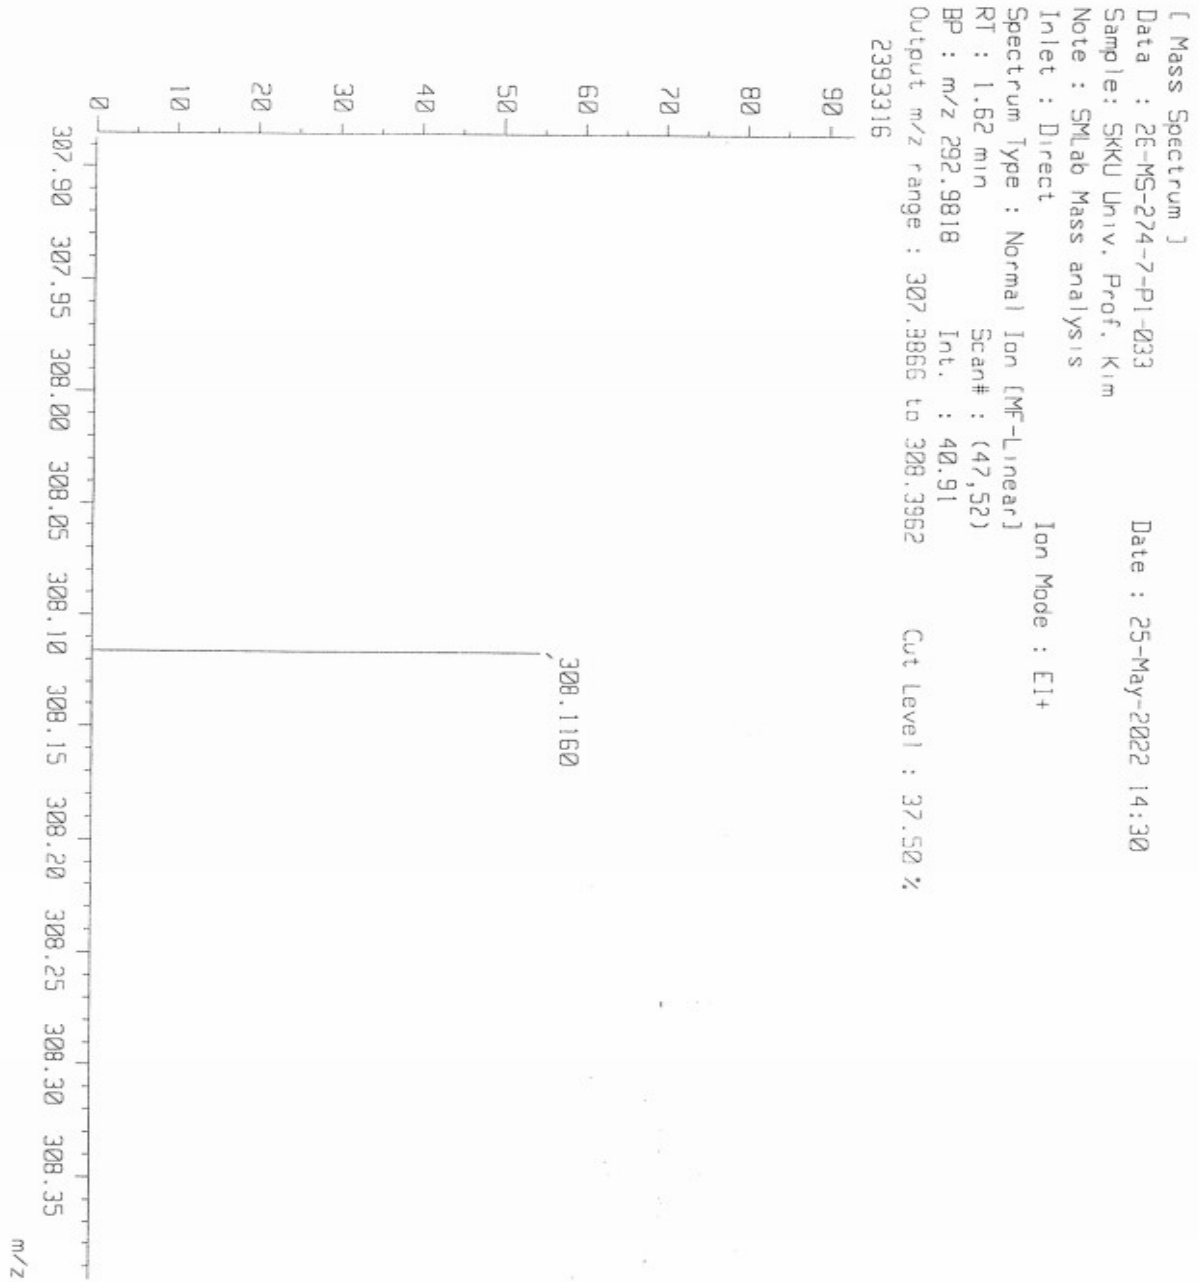

[ Elemental Composition ]

Data : 16-HR-MS286-P  
Sample: SKKU Univ. Prof. Kim  
Note : SMLab Mass analysis

Date : 13-May-2022 13:35

Page: 1

4b

Inlet : Direct

Ion Mode : EI+

RT : 0.97 min

Scan#: (27,33)

Elements : C 20/0, H 20/0, O 3/0, N 3/0

Mass Tolerance : 1000ppm, 3mmu if m/z < 3, 5mmu if m/z > 5

Unsaturation (U.S.) : -0.5 - 70.0

| Observed m/z | Int%  | Err[ppm / mmu] | U.S. | Composition       |
|--------------|-------|----------------|------|-------------------|
| 334.1318     | 100.0 | +0.2 / +0.1    | 13.0 | C 20 H 18 O 3 N 2 |

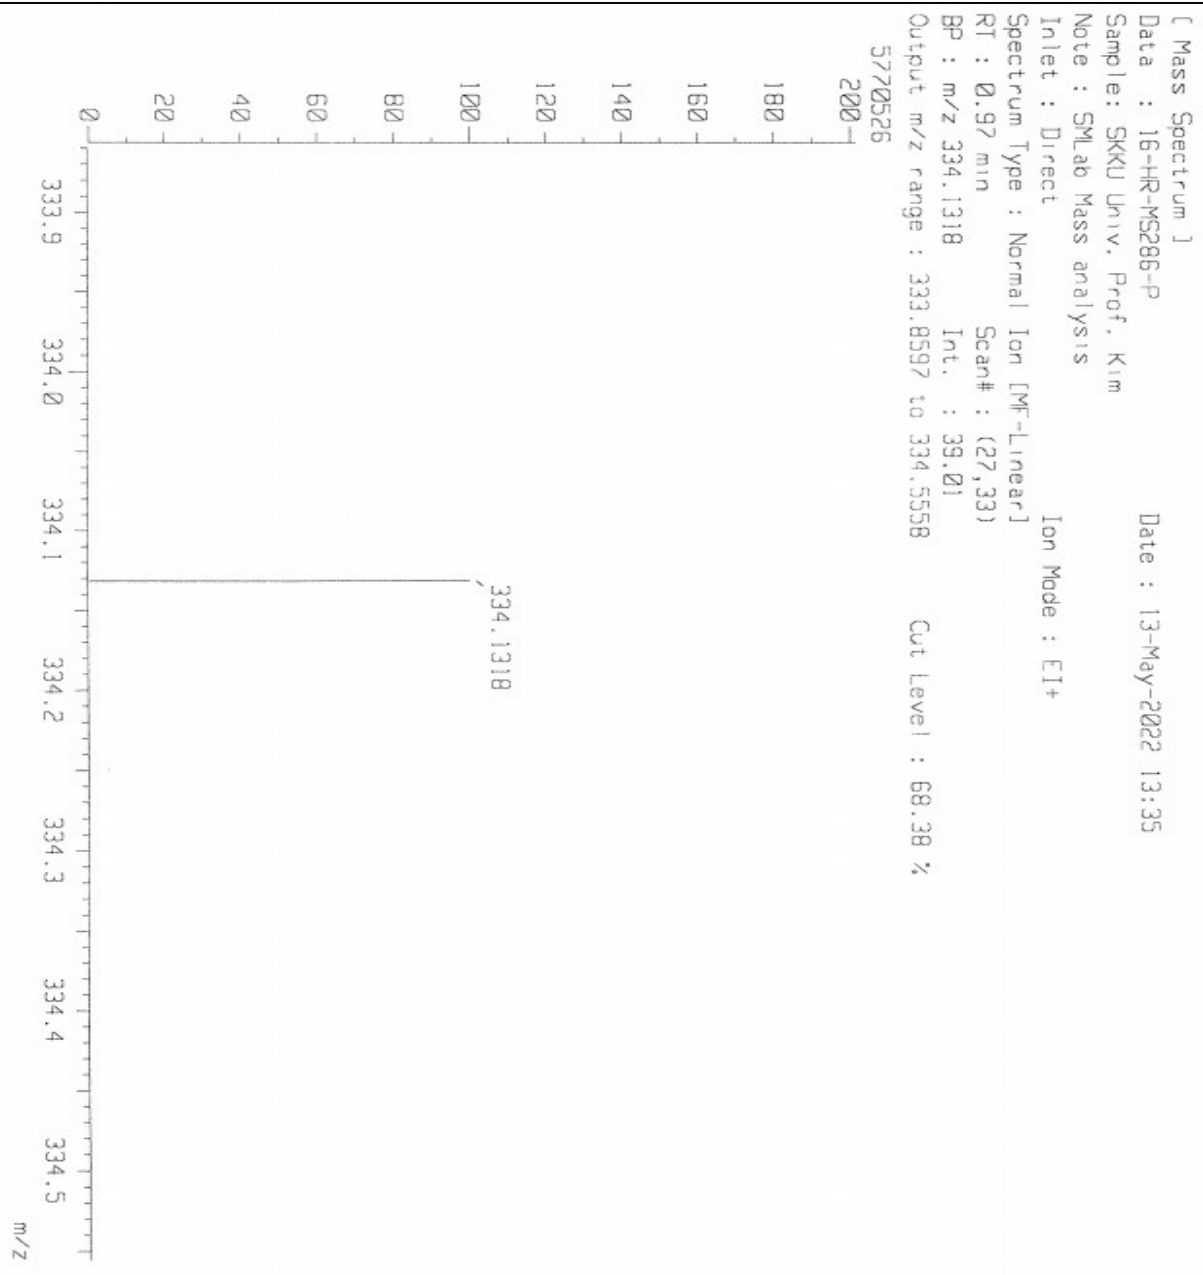

[ Elemental Composition ]

Data : 6-SG64-P-008  
Sample: SKKU Univ. Prof. Kim  
Note : SMLab Mass analysis

Date : 11-Mar-2022 17:50

Page: 1

4c

Inlet : Direct  
RT : 2.00 min  
Elements : C 22/0, H 20/0, O 4/0, N 3/0  
Mass Tolerance : 1000ppm, 3mmu if m/z < 3, 5mmu if m/z > 5  
Ion Mode : EI+  
Scan#: 61+64+66  
Unsaturations (U.S.) : -0.5 - 70.0

| Observed m/z | Int%  | Err[ppm / mmu] | U.S. | Composition       |
|--------------|-------|----------------|------|-------------------|
| 350.1268     | 100.0 | +0.4 / +0.1    | 13.0 | C 20 H 18 O 4 N 2 |

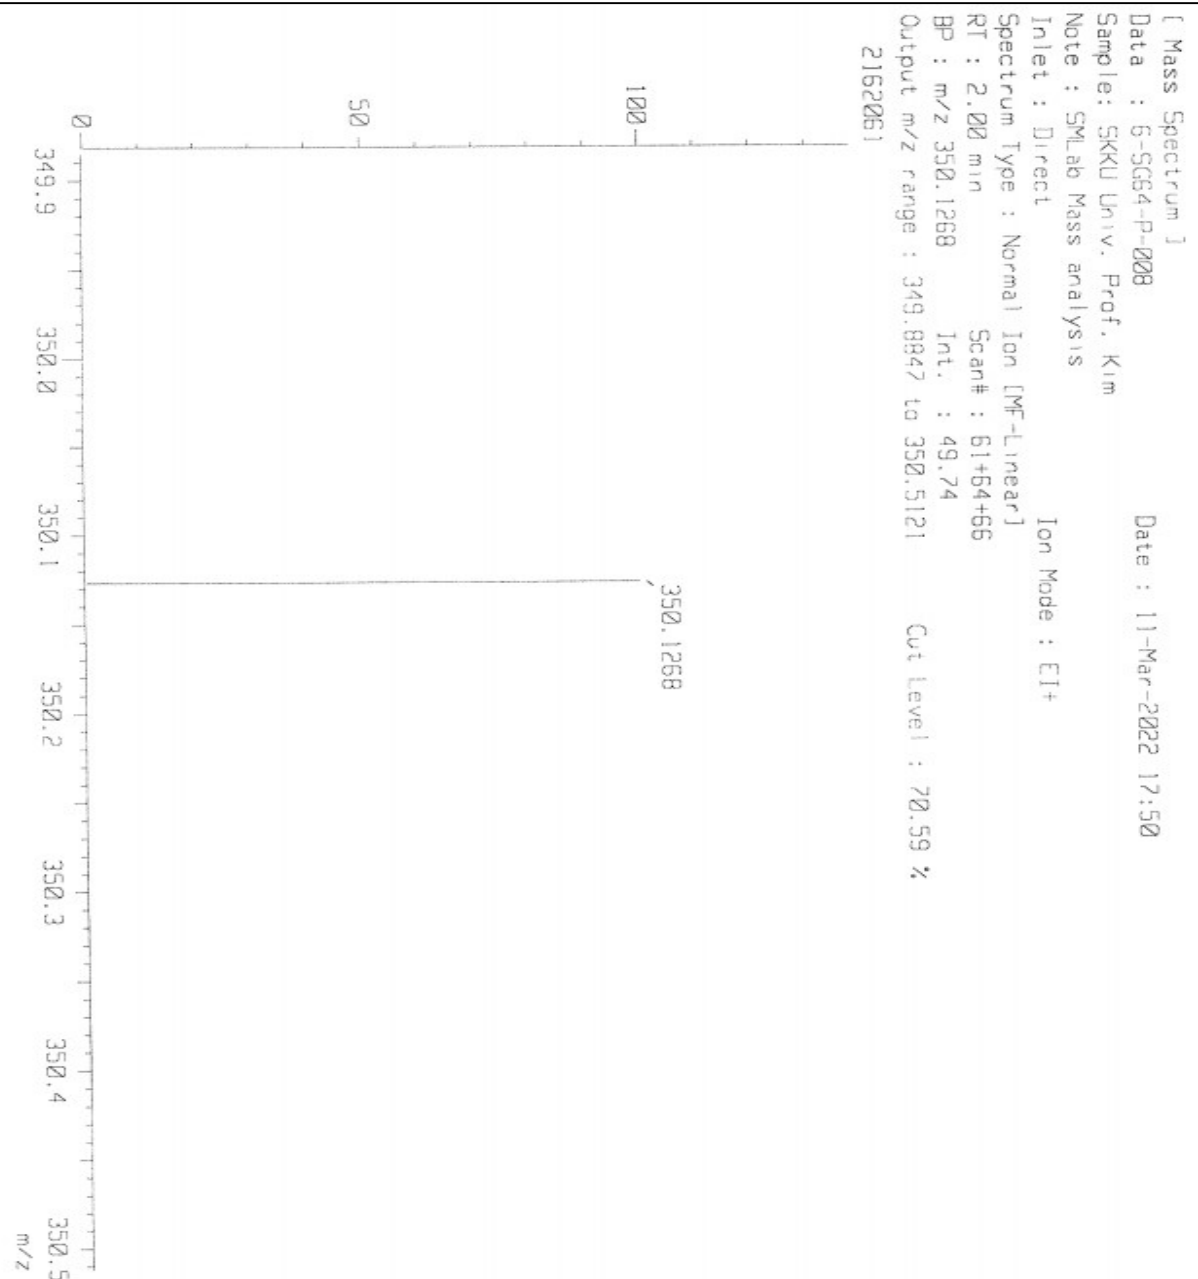

[ Elemental Composition ]

Data : 18-SG63-P-018  
 Sample: SKKU Univ. Prof. Kim  
 Note : SMLab Mass analysis

Date : 30-Mar-2022 14:35

4d

Inlet : Direct  
 RT : 1.87 min  
 Elements : C 21/0, H 16/0, O 3/0, N 2/0, F 3/0  
 Mass Tolerance : 1000ppm, 3mmu if m/z < 3, 5mmu if m/z > 5  
 Ion Mode : EI+  
 Scan#: (55,59)+51  
 Unsaturation (U.S.) : -0.5 - 70.0

| Observed m/z | Int%  | Err [ppm / mmu] | U.S. | Composition           |
|--------------|-------|-----------------|------|-----------------------|
| 388.1032     | 100.0 | -0.8 / -0.3     | 13.0 | C 20 H 15 O 3 N 2 F 3 |

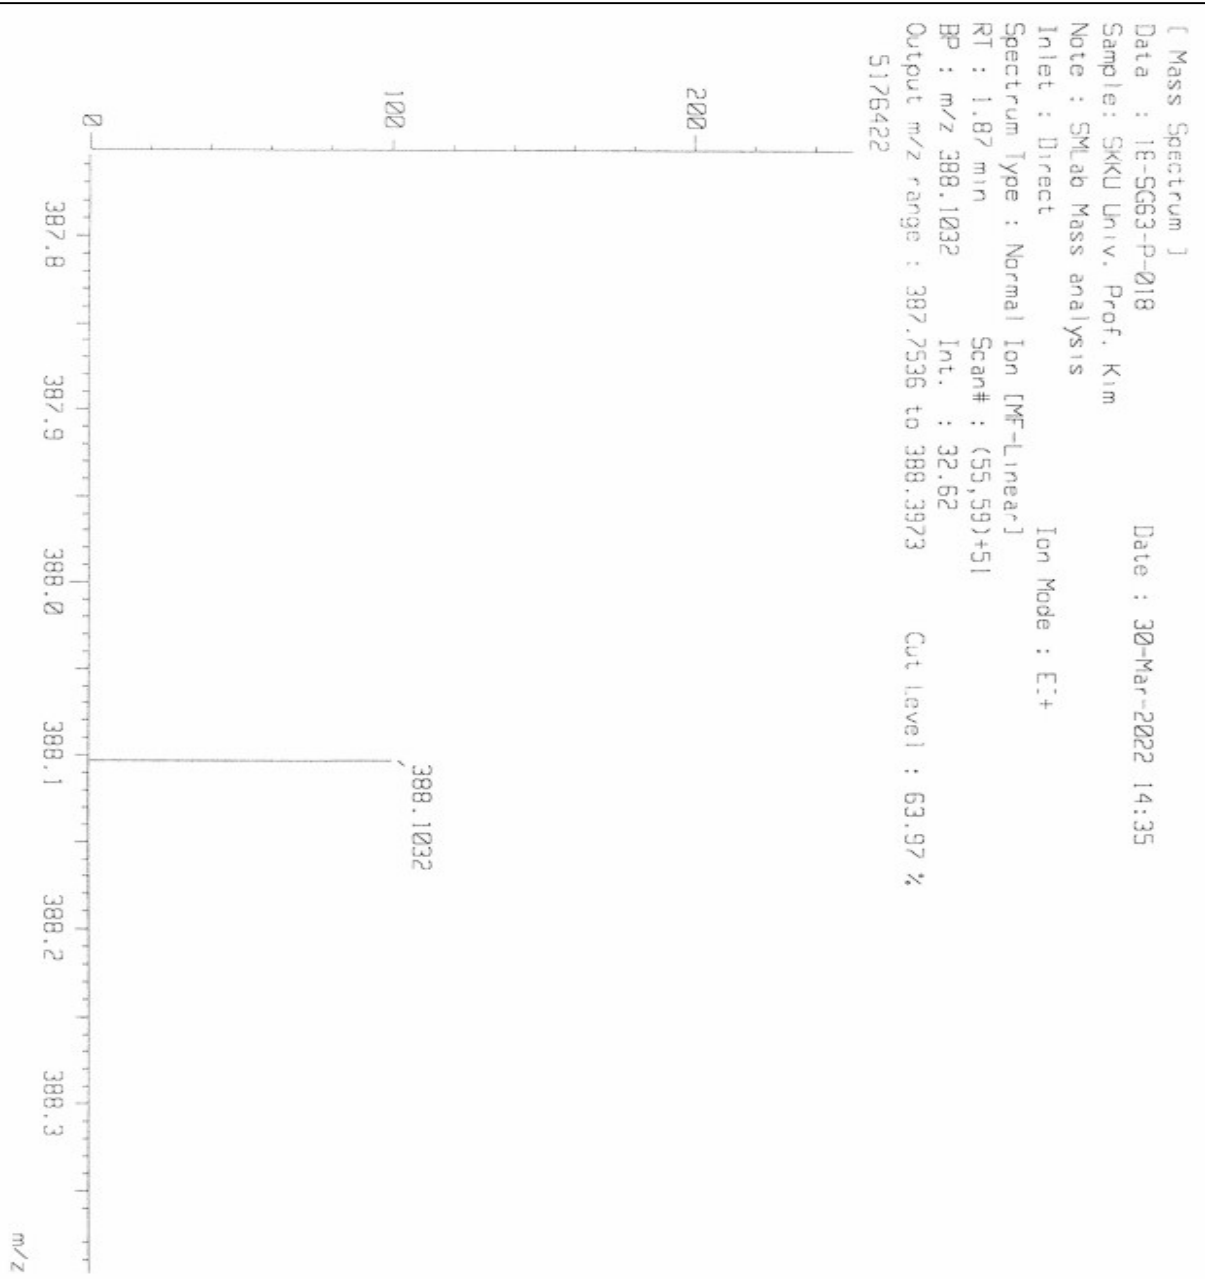

[ Elemental Composition ]

Data : 17-HR-MS287-P  
 Sample: SKKU Univ. Prof. Kim  
 Note : SMLab Mass analysis

Date : 13-May-2022 13:37

Page: 1

4e

Inlet : Direct  
 RT : 1.37 min  
 Elements : C 20/0, H 20/0, O 3/0, N 3/0  
 Mass Tolerance : 1000ppm, 3mmu if m/z < 3, 5mmu if m/z > 5  
 Ion Mode : EI+  
 Scan#: (39,45)  
 Unsaturation (U.S.) : -0.5 - 70.0

| Observed m/z | Int% | Err[ppm / mmu] | U.S. | Composition       |
|--------------|------|----------------|------|-------------------|
| 334.1318     | 43.2 | +0.1 / +0.0    | 13.0 | C 20 H 18 O 3 N 2 |

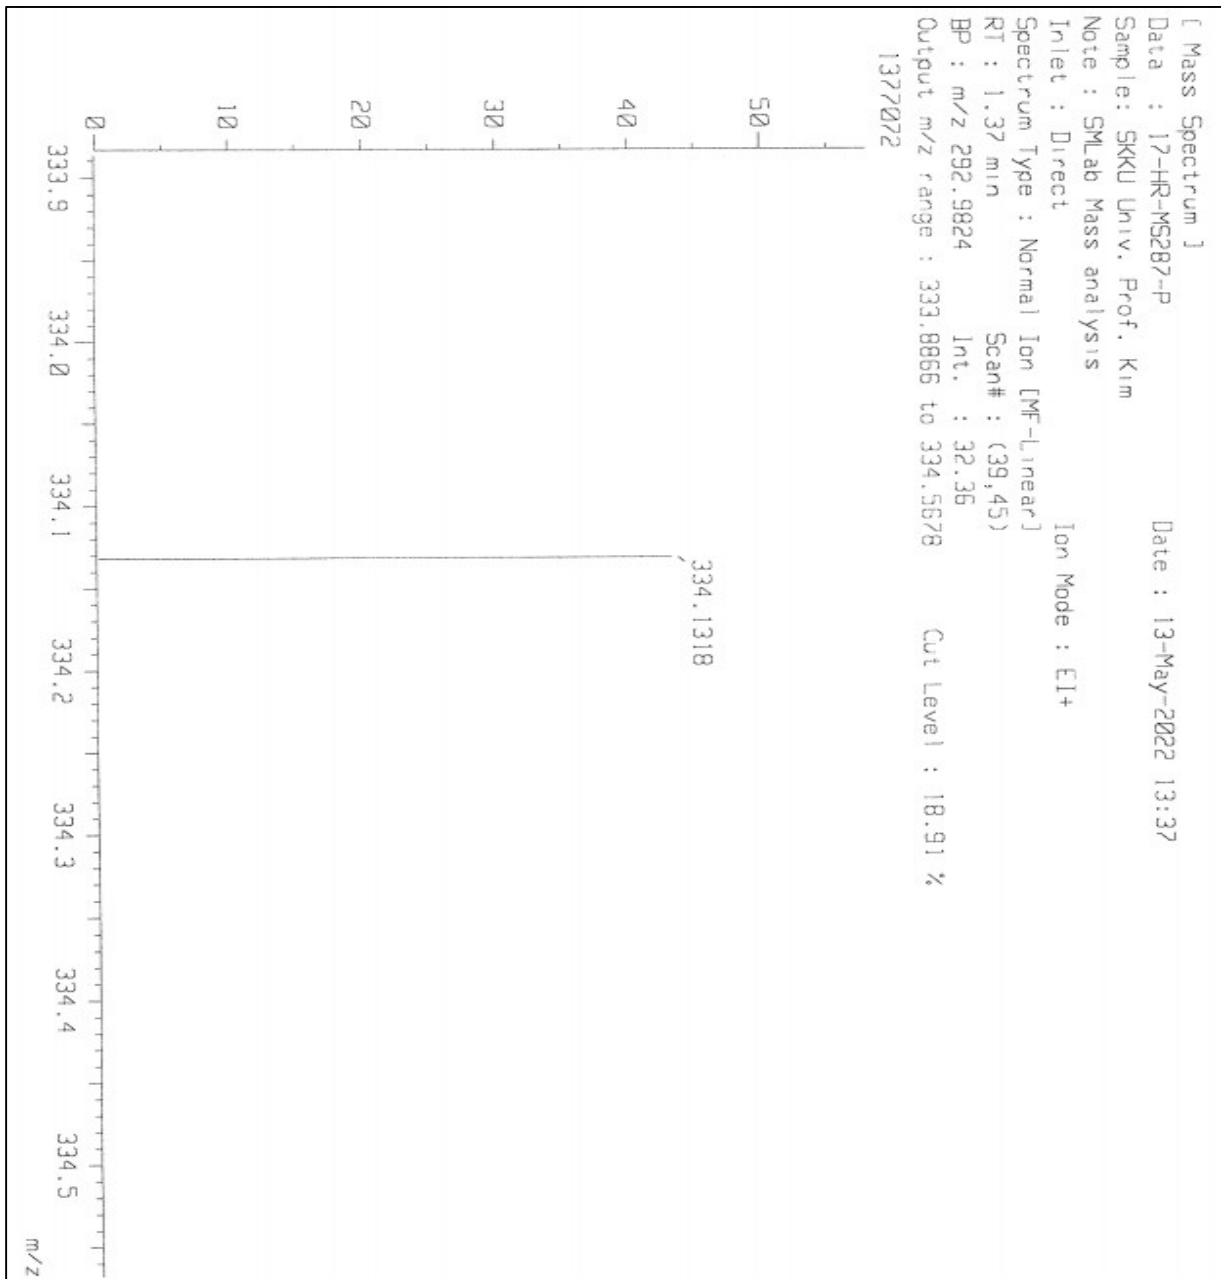

[ Elemental Composition ]

Data : 7-SG65-P-009  
 Sample: SKKU Univ. Prof. Kim  
 Note : SMLab Mass analysis

Date : 11-Mar-2022 17:54

Inlet : Direct

Ion Mode : EI+

RT : 1.44 min

Scan#: 44

Elements : C 22/0, H 22/0, O 6/0, N 3/0

Mass Tolerance : 1000ppm, 3mmu if m/z < 3, 5mmu if m/z > 5

Unsaturation (U.S.) : -0.5 - 70.0

| Observed m/z | Int% | Err [ppm / mmu] | U.S. | Composition       |
|--------------|------|-----------------|------|-------------------|
| 380.1368     | 96.9 | -1.1 / -0.4     | 13.0 | C 21 H 20 O 5 N 2 |

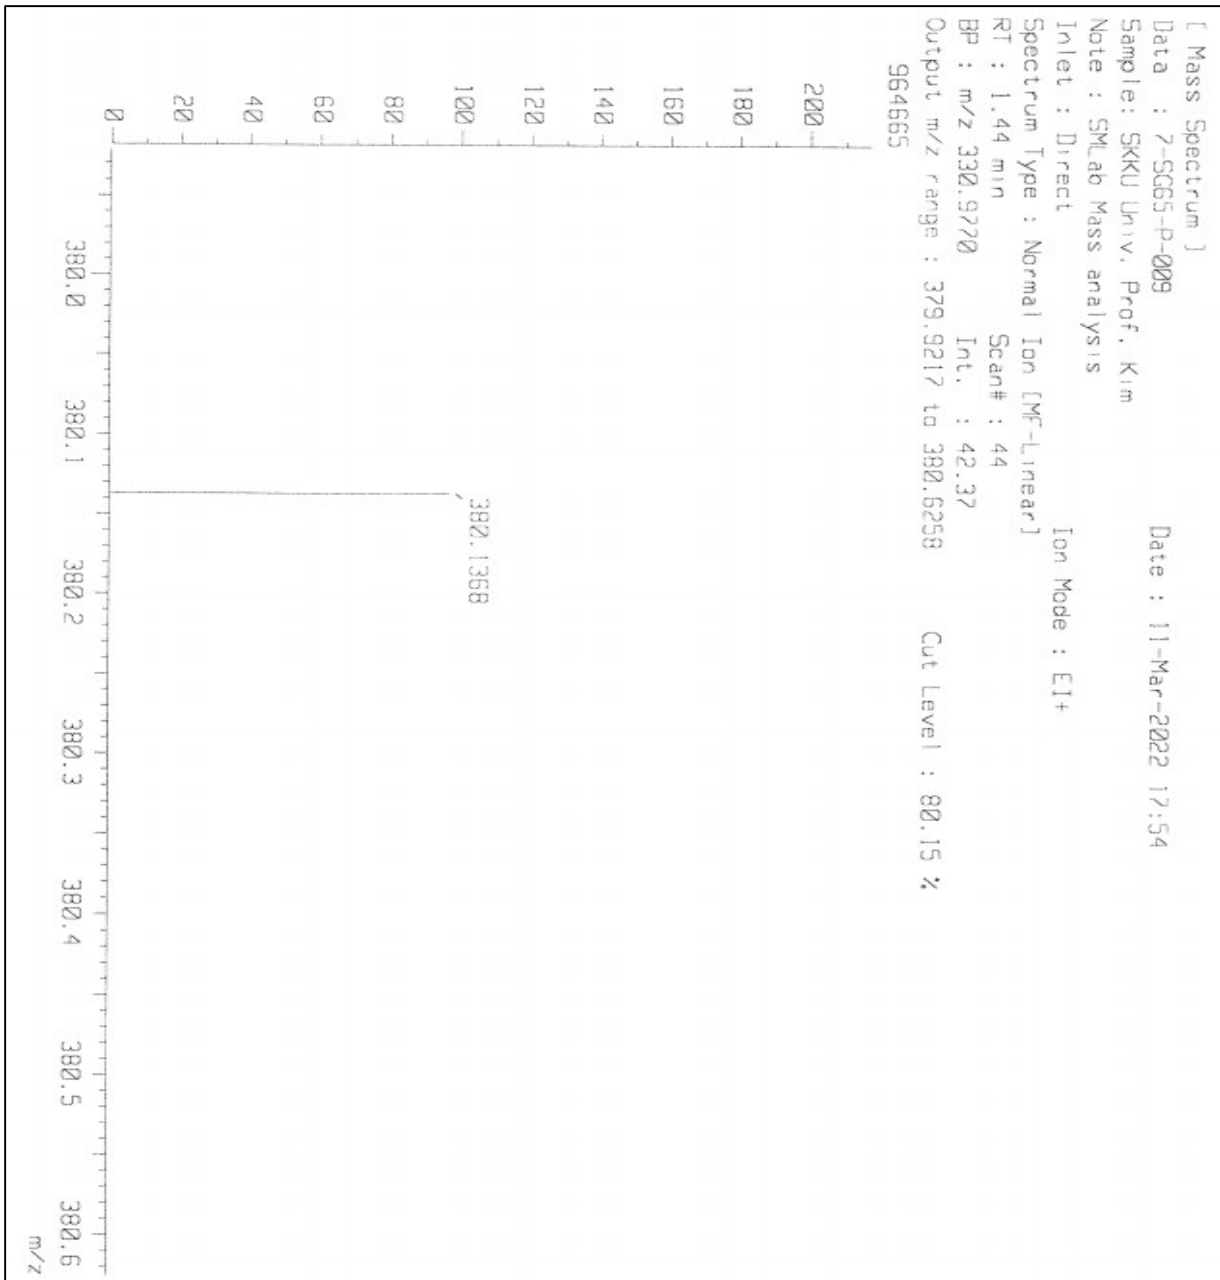

[ Elemental Composition ] Page: 1

Data : 5-CE-110-P-005 Date : 31-Oct-2022 16:52

Sample: SKKU. Univ. Prof. Kim

Note : SMLab Mass analysis

Inlet : Direct Ion Mode : EI+

RT : 1.89 min Scan#: (56,59)

Elements : C 20/0, H 21/0, O 3/0, N 3/0, F 1/0

Mass Tolerance : 1000ppm, 3mmu if m/z < 3, 10mmu if m/z > 10

Unsaturation (U.S.) : -0.5 - 70.0

| Observed m/z | Int%  | Err[ppm / mmu] | U.S. | Composition         |
|--------------|-------|----------------|------|---------------------|
| 338.1065     | 100.0 | -0.4 / -0.1    | 13.0 | C 19 H 15 O 3 N 2 F |

4g

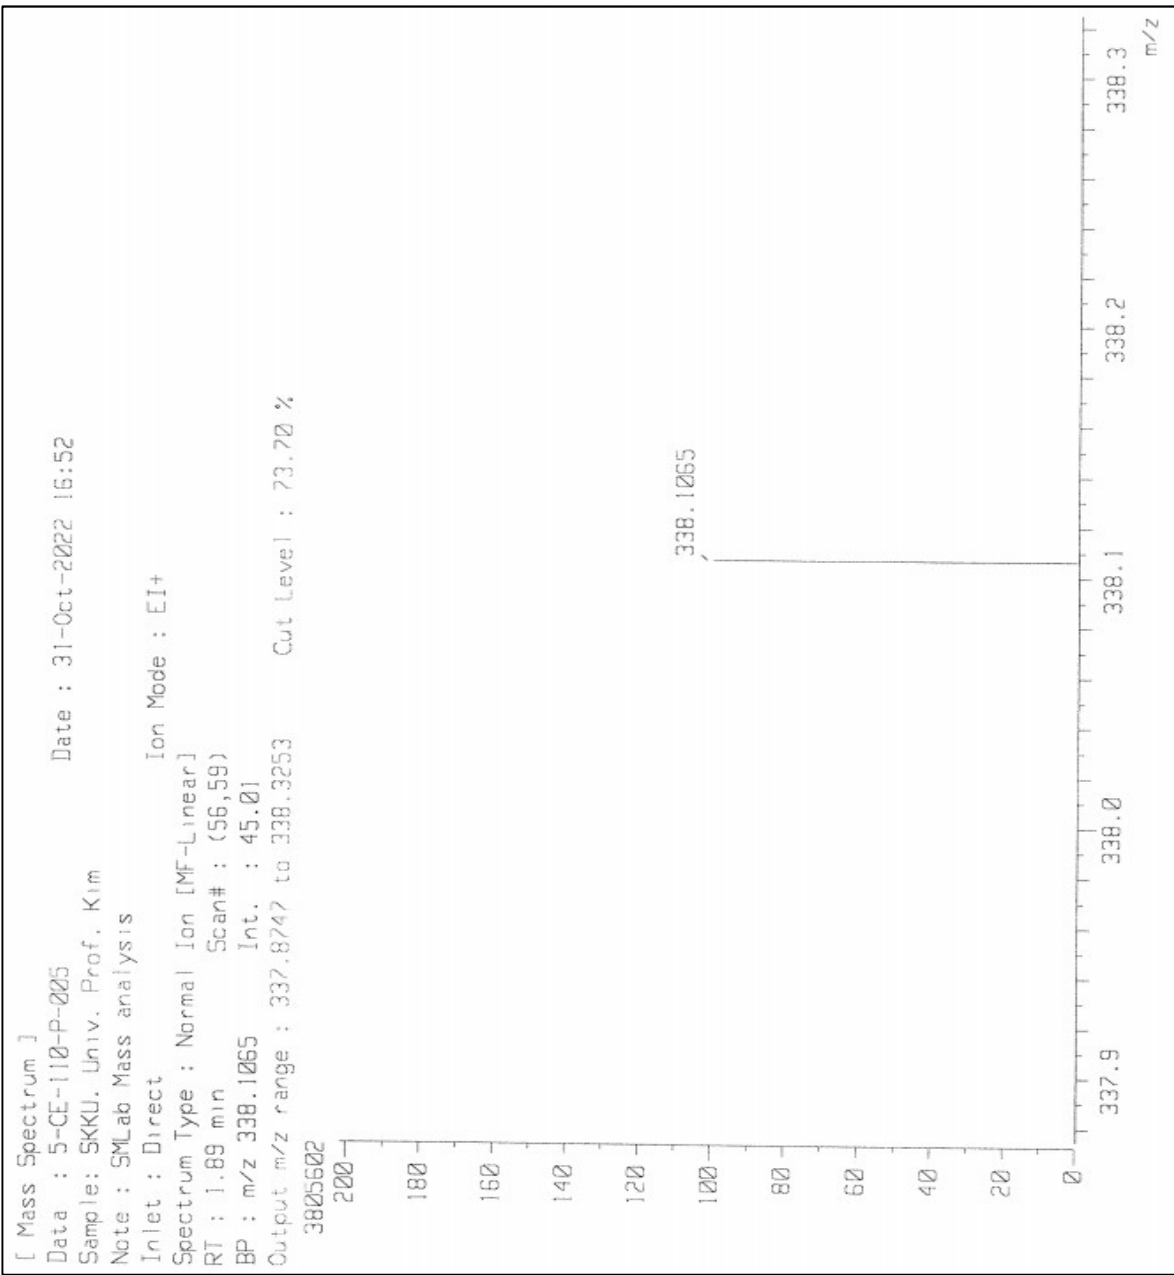

[ Elemental Composition ]

Data : 5-SG59-IP-007  
 Sample: SKKU Univ. Prof. Kim  
 Note : SMLab Mass analysis

Date : 11-Mar-2022 17:47

4h

Inlet : Direct  
 RT : 1.74 min

Ion Mode : EI+  
 Scan#: 53+51

Elements : C 23/0, H 20/0, O 3/0, N 3/0

Mass Tolerance : 1000ppm, 3mmu if m/z < 3, 5mmu if m/z > 5

Unsaturation (U.S.) : -0.5 - 70.0

| Observed m/z | Int% | Err[ppm / mmu] | U.S. | Composition       |
|--------------|------|----------------|------|-------------------|
| 370.1314     | 97.4 | -0.9 / -0.3    | 16.0 | C 23 H 18 O 3 N 2 |

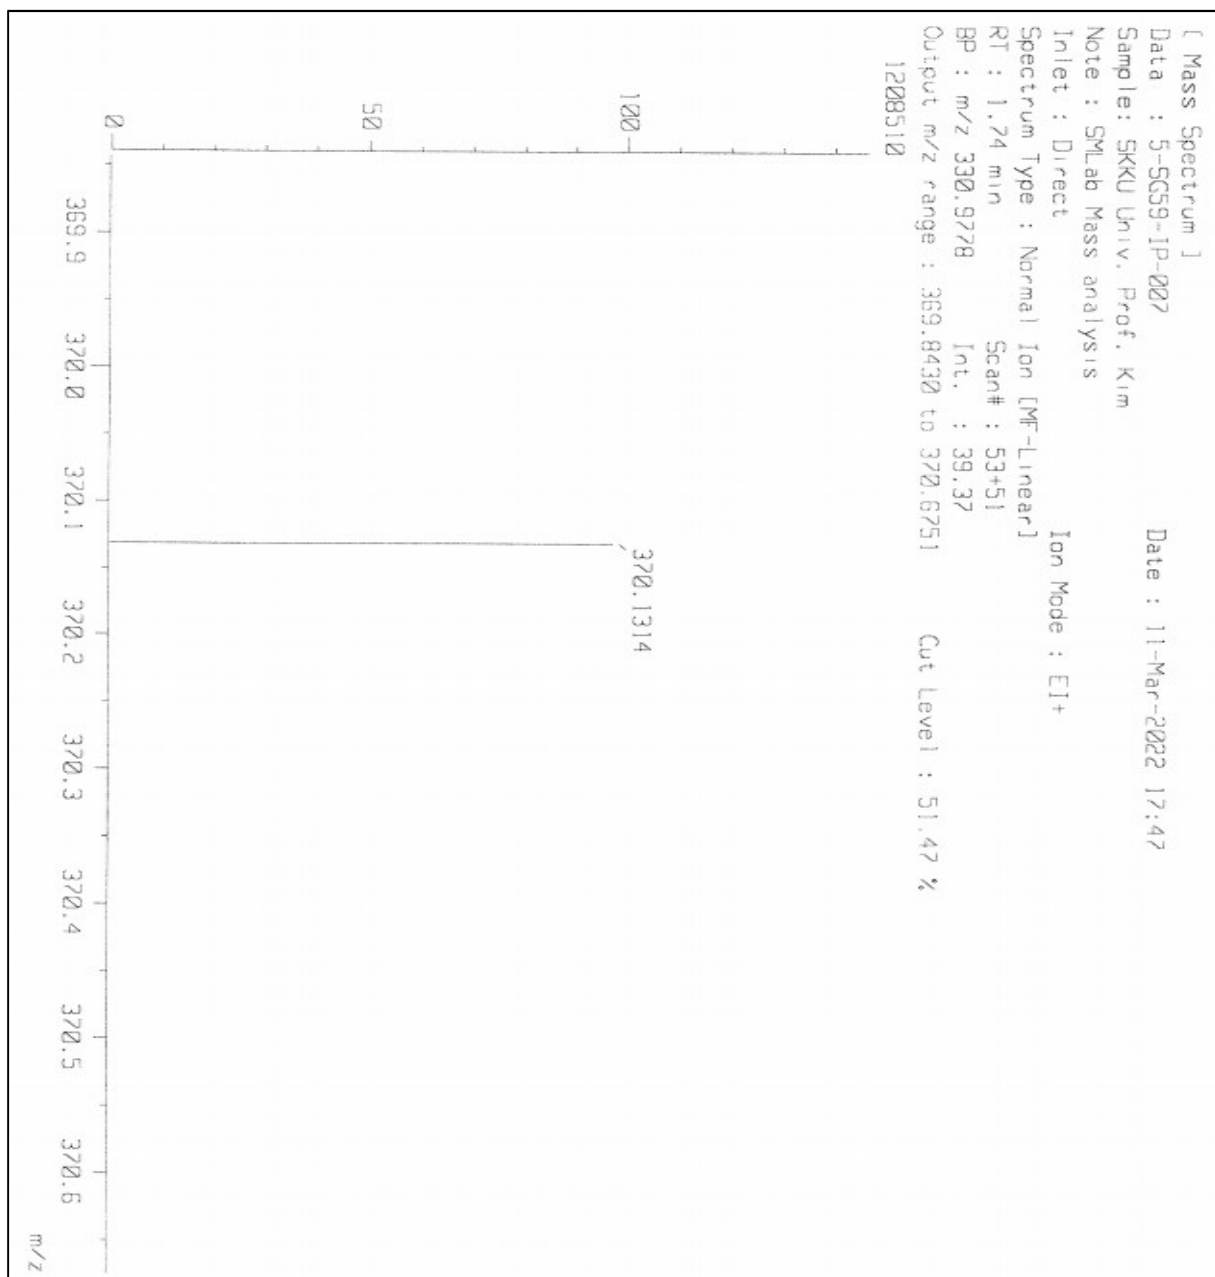



[ Elemental Composition ]

Data : HR-SG61-P-009  
 Sample: SKKU Univ. Prof. Kim  
 Note : SMLab Mass analysis  
 Inlet : Direct  
 RT : 0.94 min  
 Elements : C 22/0, H 20/0, O 4/0, N 2/0  
 Mass Tolerance : 1000ppm, 3mmu if m/z < 3, 5mmu if m/z > 5  
 Unsaturation (U.S.) : -0.5 - 70.0

Date : 14-Feb-2022 11:33

Page: 1

4i

Ion Mode : EI+  
 Scan#: 29

| Observed m/z | Int% | Err[ppm / mmu] | U.S. | Composition       |
|--------------|------|----------------|------|-------------------|
| 346.1316     | 96.7 | -0.5 / -0.2    | 14.0 | C 21 H 18 O 3 N 2 |

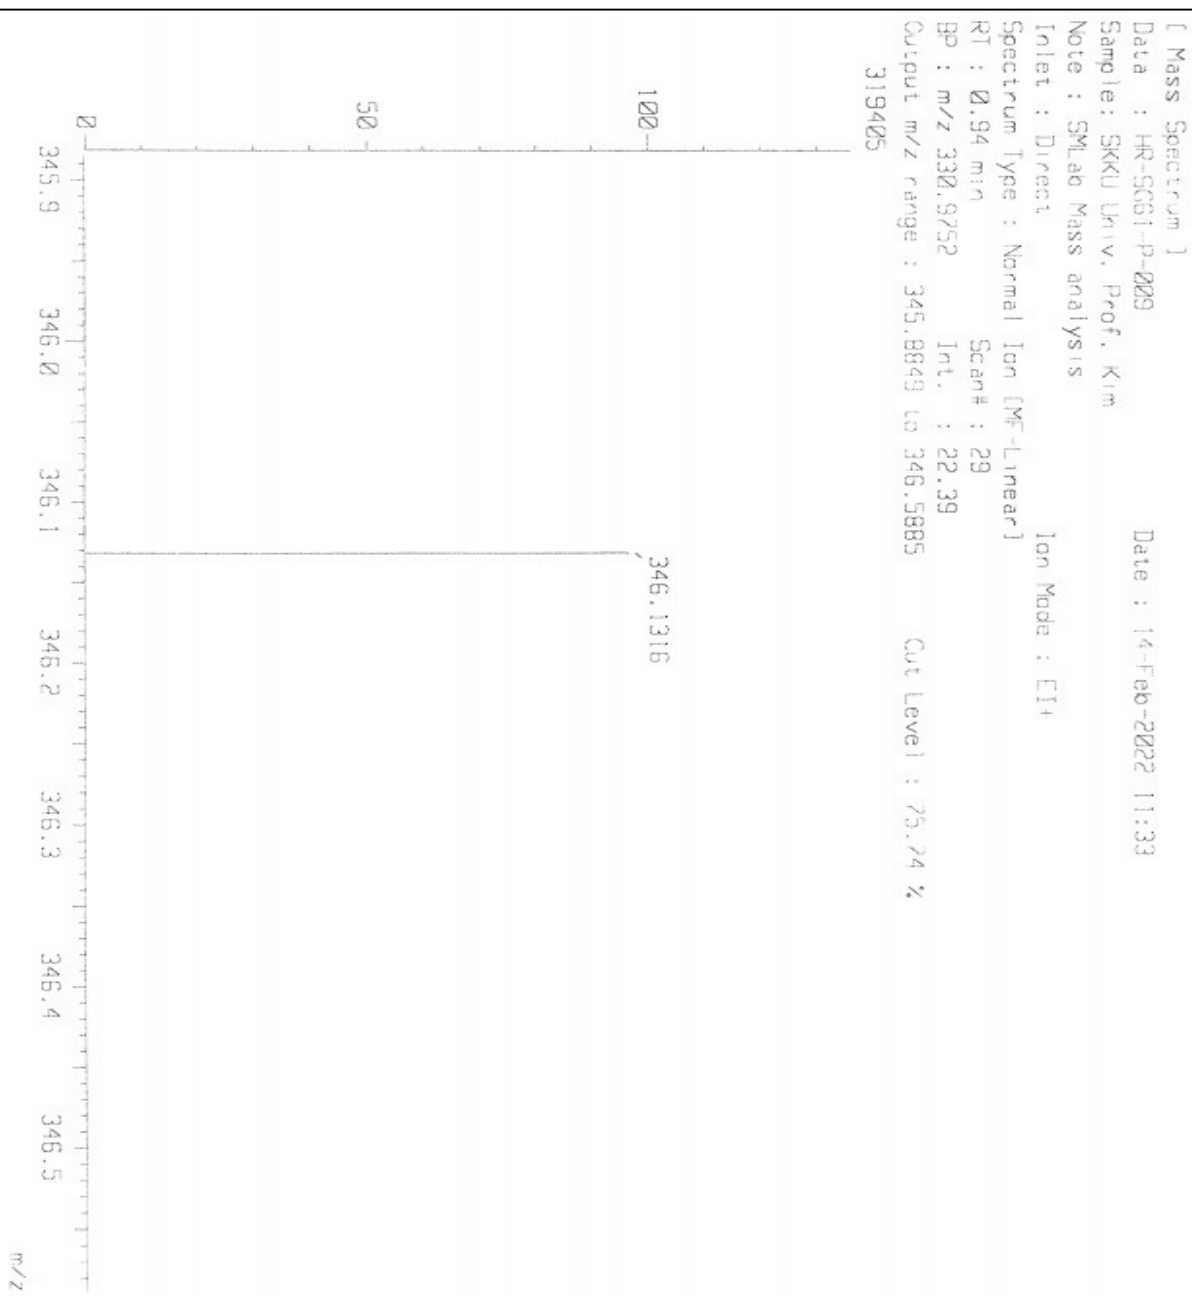

[ Elemental Composition ]

Data : HR-SG60-P-010  
 Sample: SKKU Univ. Prof. Kim  
 Note : SMLab Mass analysis

Date : 14-Feb-2022 11:35

Page: 1

4j

Inlet : Direct Ion Mode : EI+  
 RT : 1.09 min Scan#: (33,34)+43  
 Elements : C 18/0, H 15/0, O 4/0, N 2/0, S 1/0  
 Mass Tolerance : 1000ppm, 3mmu if m/z < 3, 5mmu if m/z > 5  
 Unsaturation (U.S.) : -0.5 - 70.0

| Observed m/z | Int% | Err[ppm / mmu] | U.S. Composition         |
|--------------|------|----------------|--------------------------|
| 326.0726     | 22.8 | +0.2 / +0.1    | 13.0 C 17 H 14 O 3 N 2 S |

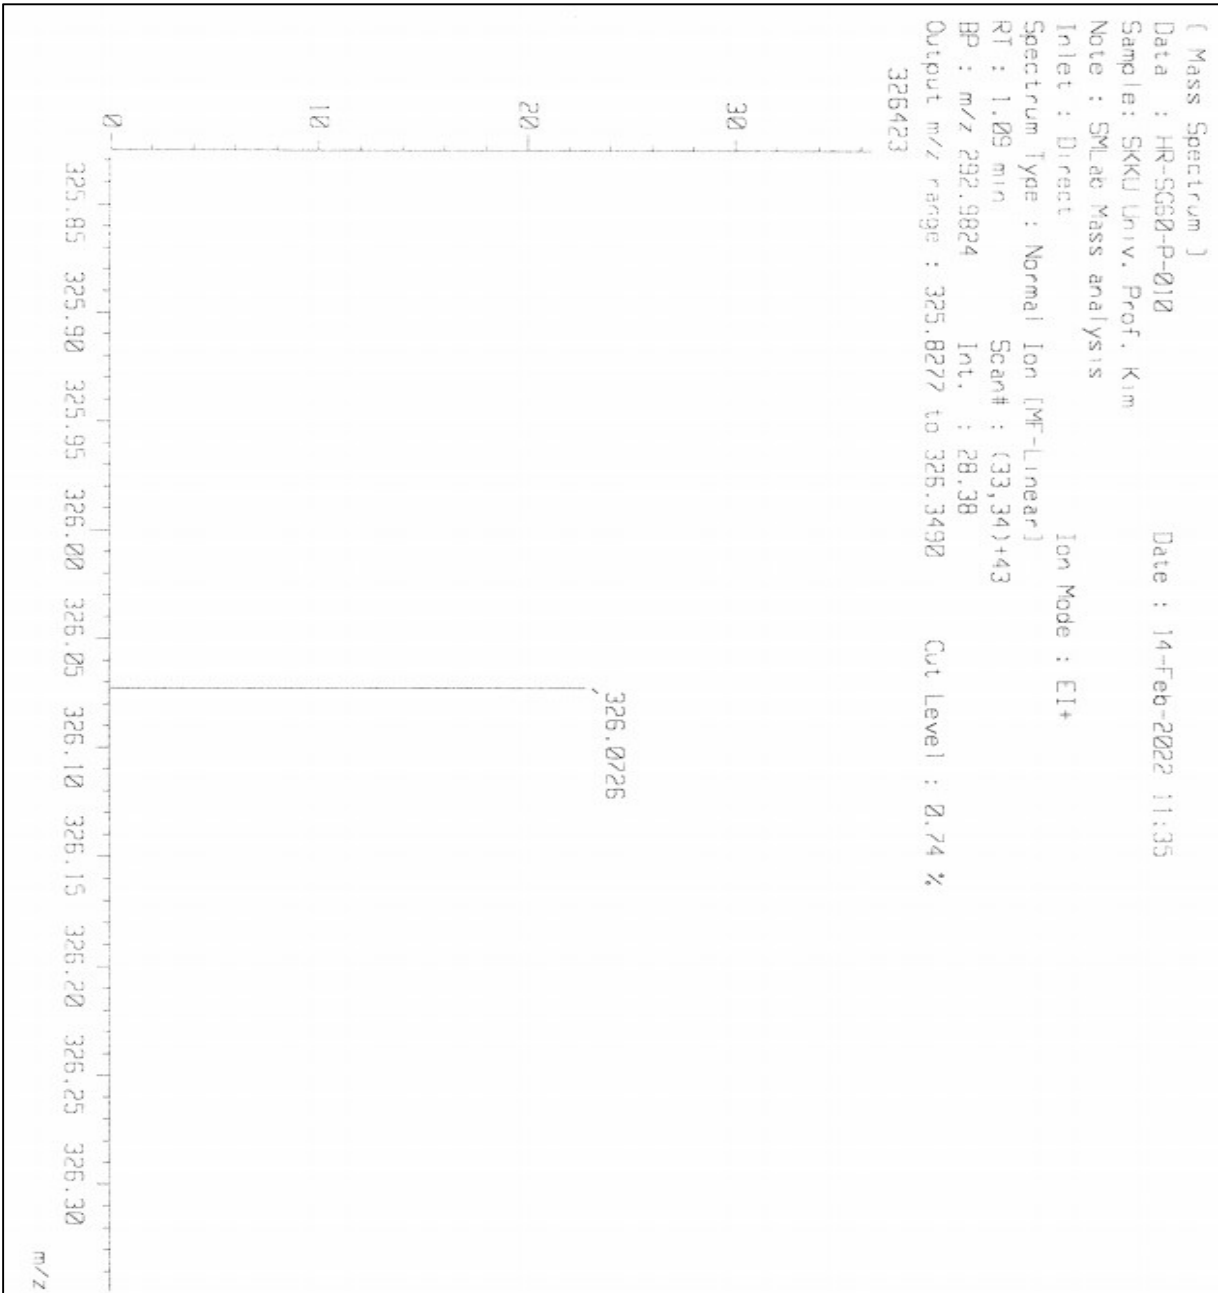

[ Elemental Composition ]

Data : 2-CE43-P-004  
Sample: SKKU Univ. prof. Kim  
Note : SMLab Mass analysis

Date : 17-Jun-2022 14:20

4k

Inlet : Direct

Ion Mode : EI+

RT : 1.32 min

Scan#: (40,41)

Elements : C 20/0, H 23/0, O 3/0, N 3/0

Mass Tolerance : 1000ppm, 3mmu if m/z < 3, 5mmu if m/z > 5

Unsaturation (U.S.) : -0.5 - 70.0

| Observed m/z | Int%  | Err[ppm / mmu] | U.S. | Composition       |
|--------------|-------|----------------|------|-------------------|
| 314.1632     | 100.0 | +0.4 / +0.1    | 9.0  | C 18 H 22 O 3 N 2 |

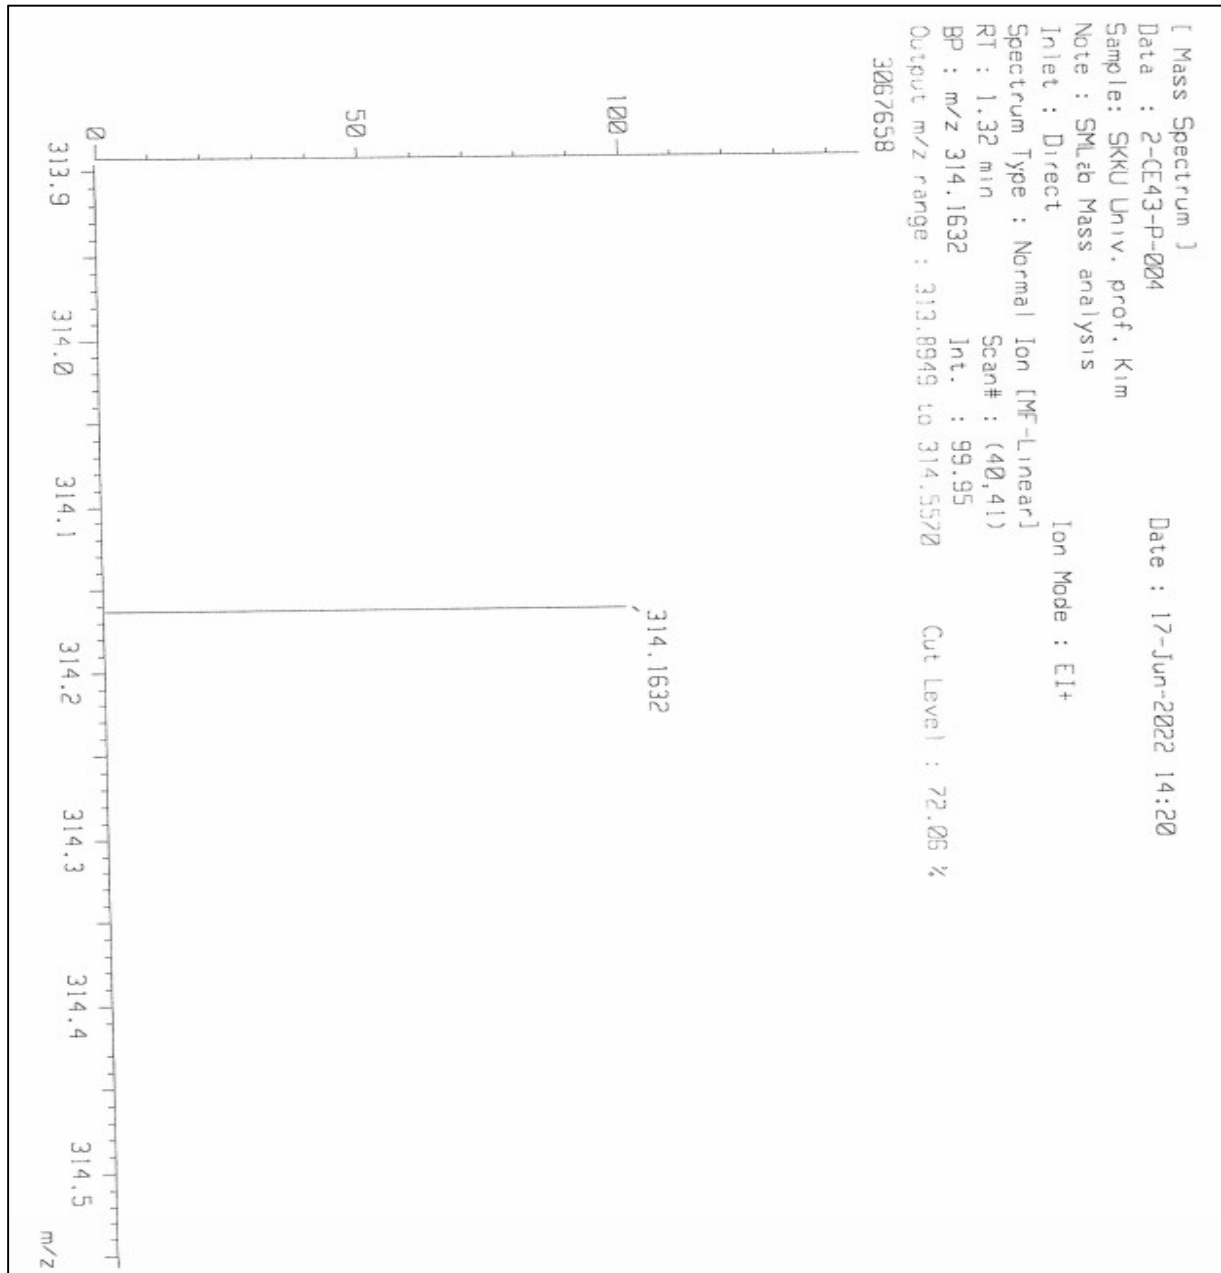

[ Elemental Composition ]

Data : 8-MS256-P1-014  
 Sample: SKKU Univ. prof. Kim  
 Note : SMLab Mass analysis

Date : 03-Aug-2022 18:57

5a

Inlet : Direct  
 RT : 1.00 min

Ion Mode : EI+  
 Scan#: 31+34

Elements : C 16/0, H 15/0, O 4/0, N 1/0

Mass Tolerance : 1000ppm, 3mmu if m/z < 3, 5mmu if m/z > 5  
 Unsaturation (U.S.) : -0.5 - 70.0

| Observed m/z | Int% | Err[ppm / mmu] | U.S. Composition    |
|--------------|------|----------------|---------------------|
| 245.0687     | 53.5 | -0.3 / -0.1    | 9.0 C 13 H 11 O 4 N |

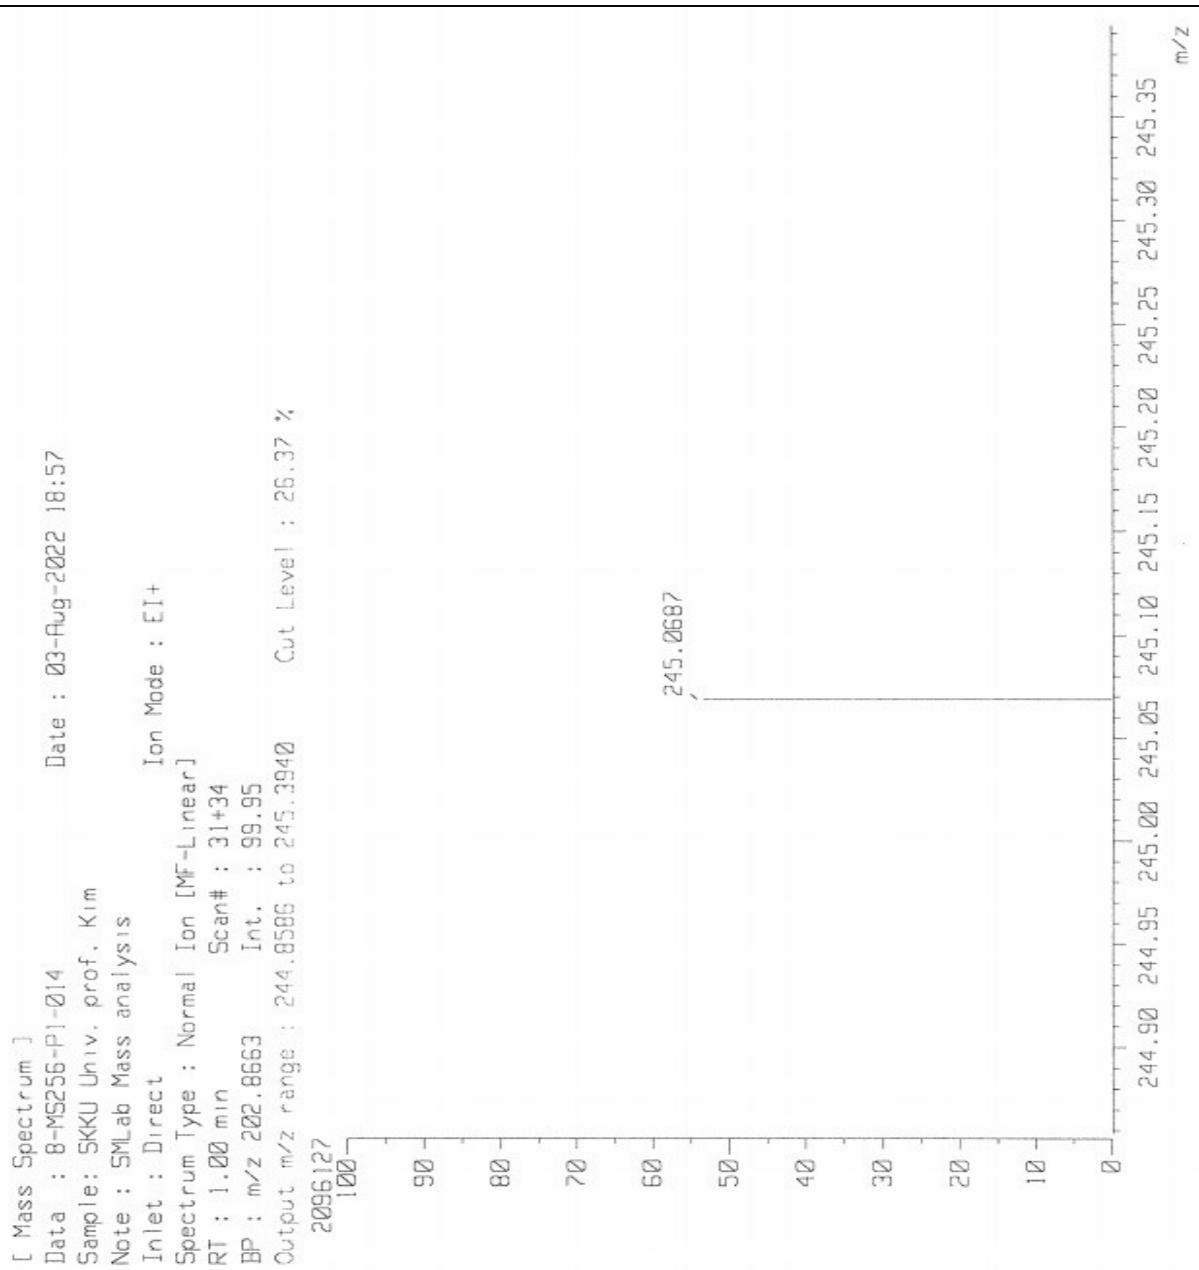

[ Elemental Composition ]

Data : 15-HR-MS284-P  
Sample: SKKU Univ. Prof. Kim  
Note : SMLab Mass analysis

Date : 13-May-2022 13:32

5b

Inlet : Direct  
RT : 2.04 min  
Elements : C 25/0, H 28/0, O 3/0, N 1/0  
Ion Mode : EI+  
Scan#: (59,65)  
Mass Tolerance : 1000ppm, 3mmu if m/z < 3, 5mmu if m/z > 5  
Unsaturation (U.S.) : -0.5 - 70.0

| Observed m/z | Int%  | Err[ppm / mmu] | U.S. | Composition     |
|--------------|-------|----------------|------|-----------------|
| 363.1834     | 100.0 | -0.1 / +0.0    | 12.0 | C 23 H 25 O 3 N |

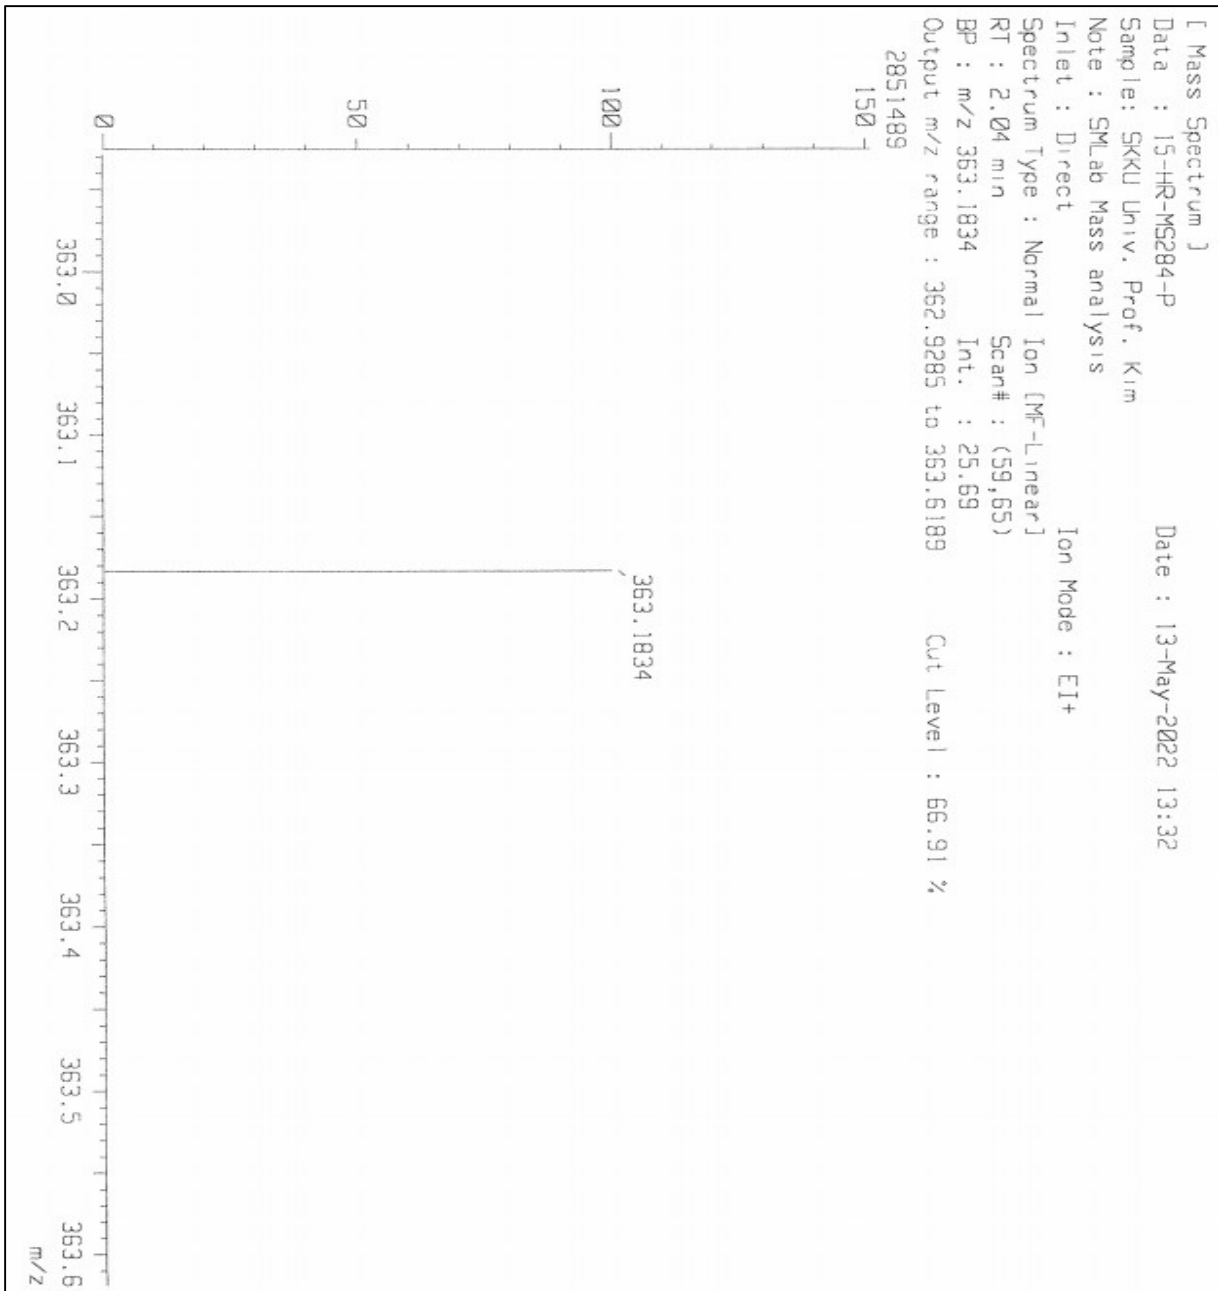

[ Elemental Composition ]

Data : 16-MS270-P-017

Date : 30-Mar-2022 14:32

Sample: SKKU Univ. Prof. Kim

5c

Note : SMLab Mass analysis

Inlet : Direct

Ion Mode : EI+

RT : 1.00 min

Scan#: 31

Elements : C 30/0, H 35/0, O 2/0, N 1/0

Mass Tolerance : 1000ppm, 3mmu if m/z < 3, 5mmu if m/z > 5

Unsaturation (U.S.) : -0.5 - 70.0

| Observed m/z | Int% | Err[ppm / mmu] | U.S. | Composition     |
|--------------|------|----------------|------|-----------------|
| 413.2351     | 41.6 | -0.8 / -0.3    | 14.0 | C 28 H 31 O 2 N |

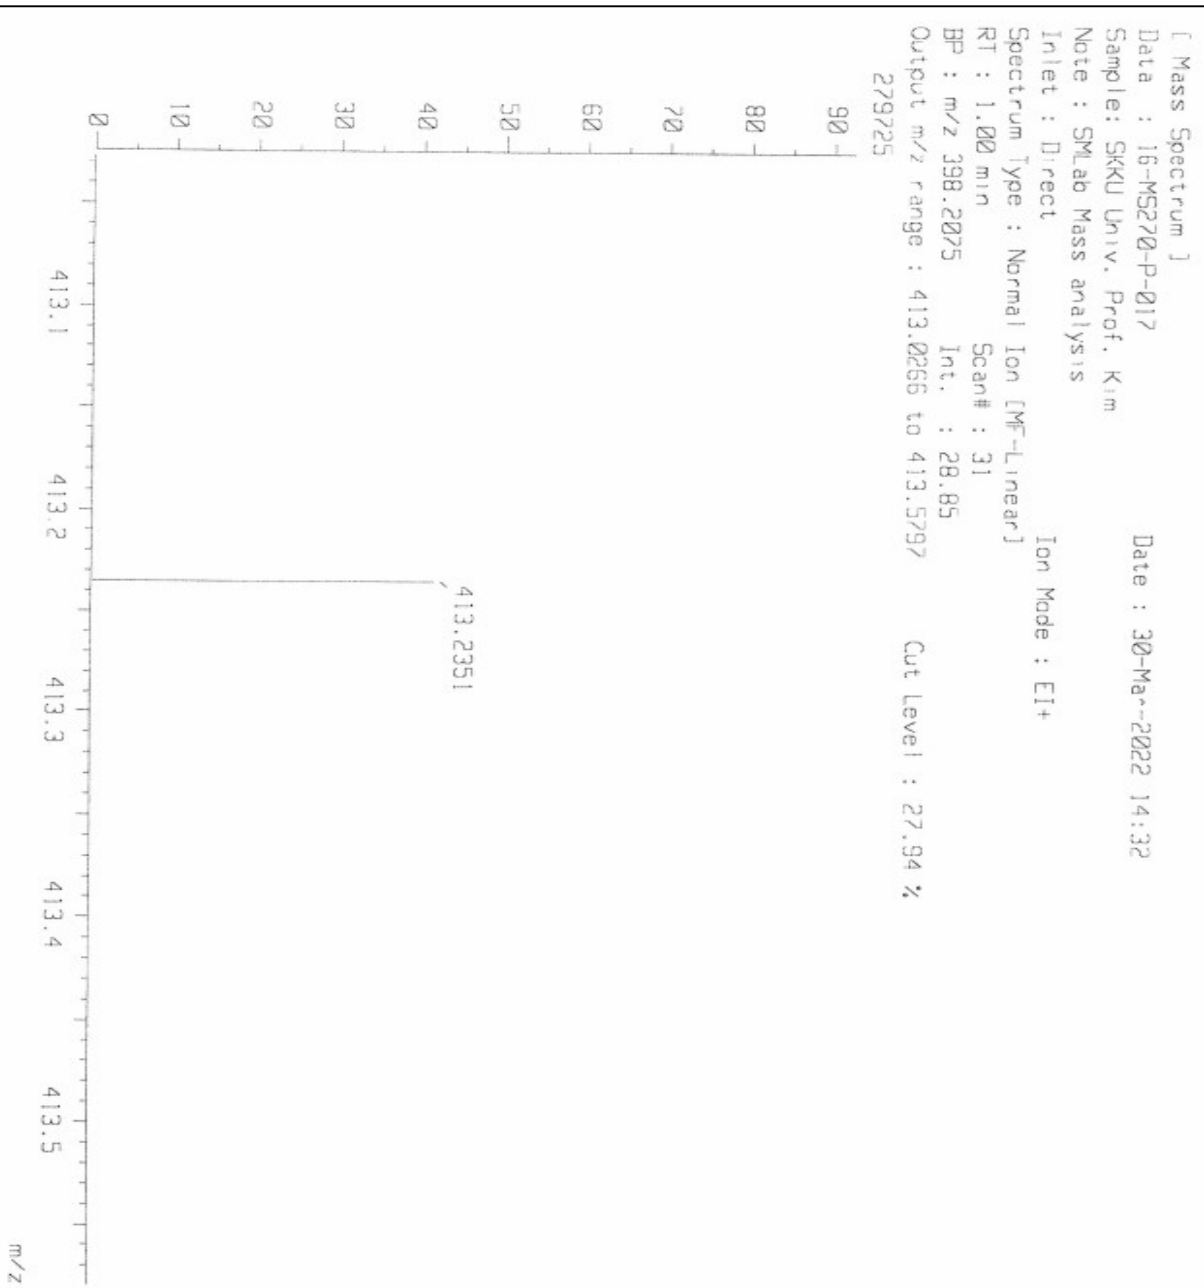

[ Elemental Composition ]

Data : 2-MS281-P-002  
Sample: SKKU Univ. Prof. KIM  
Note : SMLab Mass analysis

Date : 04-May-2022 11:49

Page: 1

5d

Inlet : Direct  
RT : 2.44 min

Ion Mode : EI+  
Scan#: (73,75)+74

Elements : C 40/0, H 35/0, O 2/0, N 6/0

Mass Tolerance : 1000ppm, 3mmu if m/z < 3, 5mmu if m/z > 5

Unsaturation (U.S.) : -0.5 - 70.0

| Observed m/z | Int%  | Err [ppm / mmu] | U.S. | Composition       |
|--------------|-------|-----------------|------|-------------------|
| 579.2629     | 100.0 | -0.9 / -0.5     | 24.0 | C 37 H 33 O 2 N 5 |

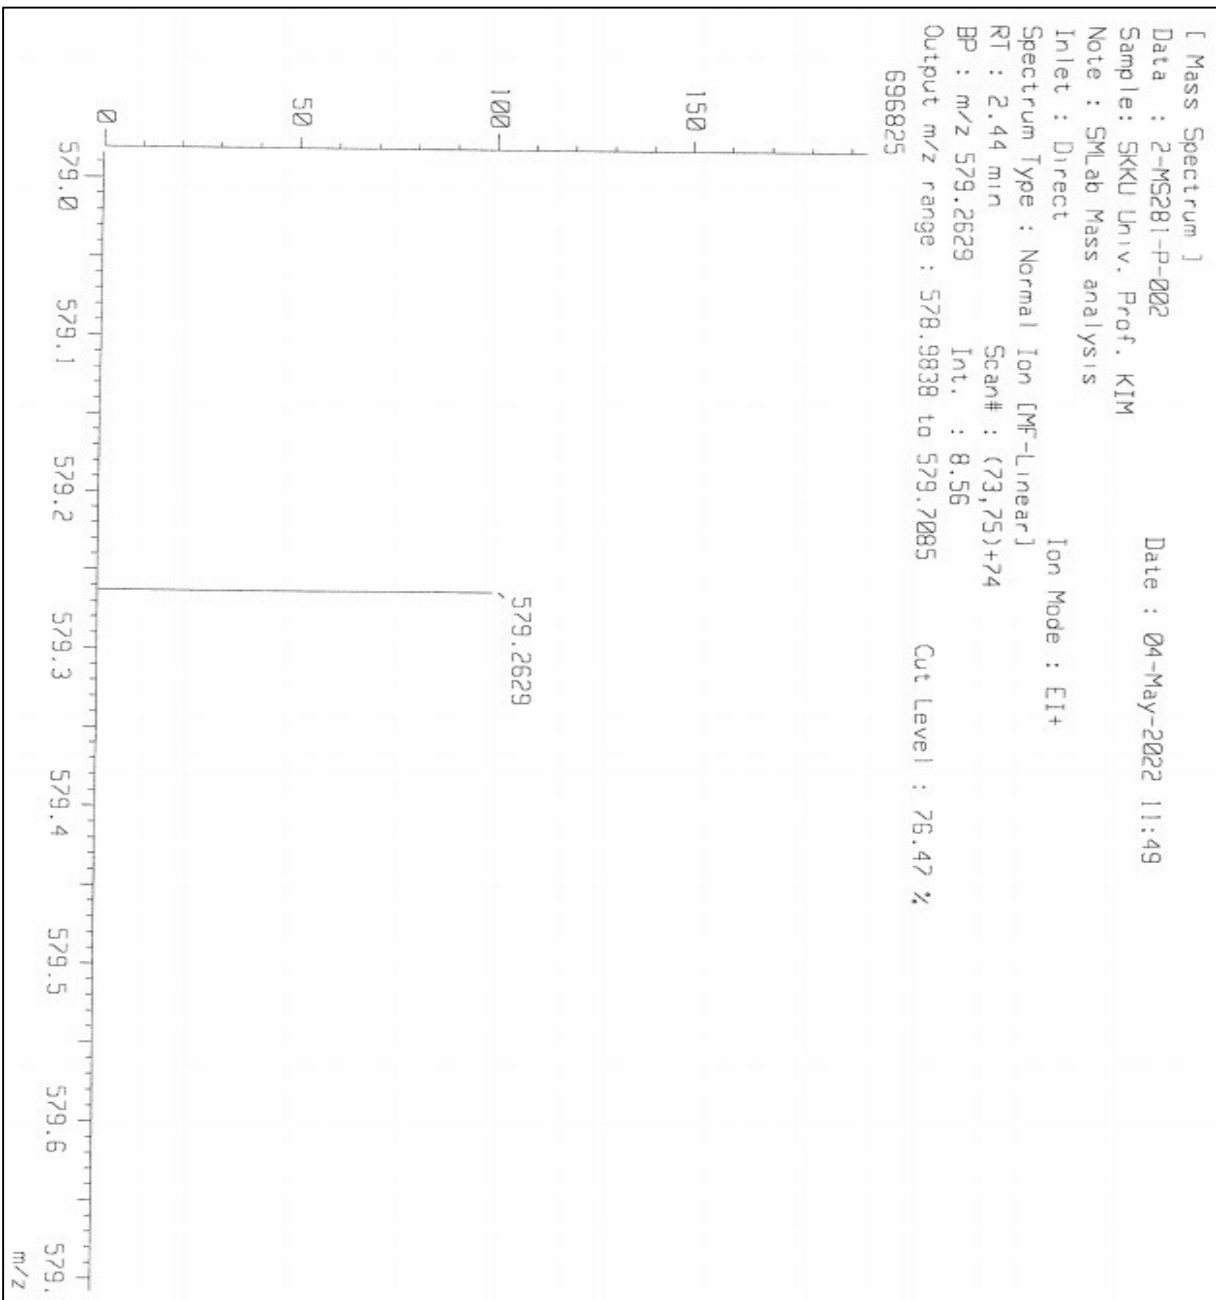

[ Elemental Composition ]

Data : 17-FAB-MS273-P-007  
 Sample: SKKU Univ. Prof. Kim  
 Note : SM Lab Research Center

Date : 30-Mar-2022 12:25

Page: 1

5e

Inlet : Reserv.

Ion Mode : FAB+

RT : 2.65 min

Scan#: (79,82)

Elements : C 32/0, H 40/0, O 5/0, N 3/0

Mass Tolerance : 1000ppm, 3mmu if m/z < 3, 10mmu if m/z > 10

Unsaturation (U.S.) : -0.5 - 80.0

| Observed m/z | Int%  | Err[ppm / mmu] | U.S. | Composition       |
|--------------|-------|----------------|------|-------------------|
| 518.3019     | 100.0 | +0.0 / +0.0    | 13.5 | C 31 H 40 O 4 N 3 |

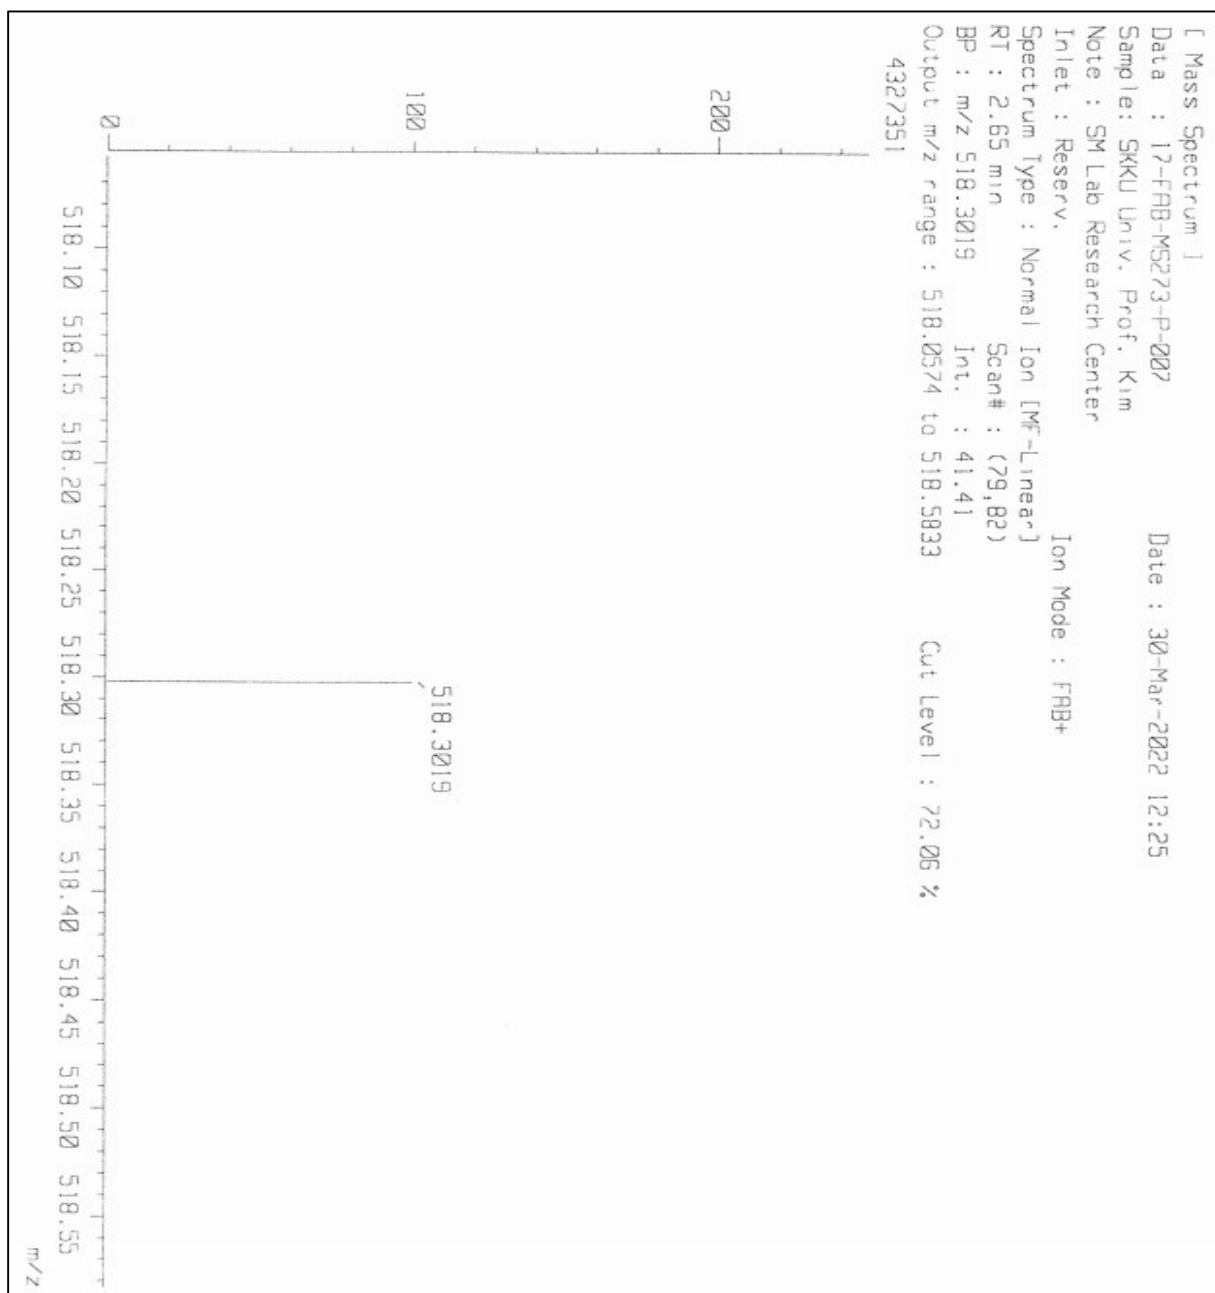



[ Elemental Composition ]

Data : 20-HR-SG95-P  
 Sample: SKKU Univ. Prof. Kim  
 Note : SMLab Mass analysis

Date : 13-May-2022 13:44

Page: 1

6a

Inlet : Direct  
 RT : 0.99 min  
 Elements : C 20/0, H 18/0, O 5/0, N 2/0  
 Mass Tolerance : 1000ppm, 3mmu if m/z < 3, 5mmu if m/z > 5  
 Ion Mode : EI+  
 Scan#: (29,32)  
 Unsaturation (U.S.) : -0.5 - 70.0

| Observed m/z | Int% | Err[ppm / mmu] | U.S. | Composition       |
|--------------|------|----------------|------|-------------------|
| 364.1058     | 44.8 | -0.3 / -0.1    | 14.0 | C 20 H 16 O 5 N 2 |

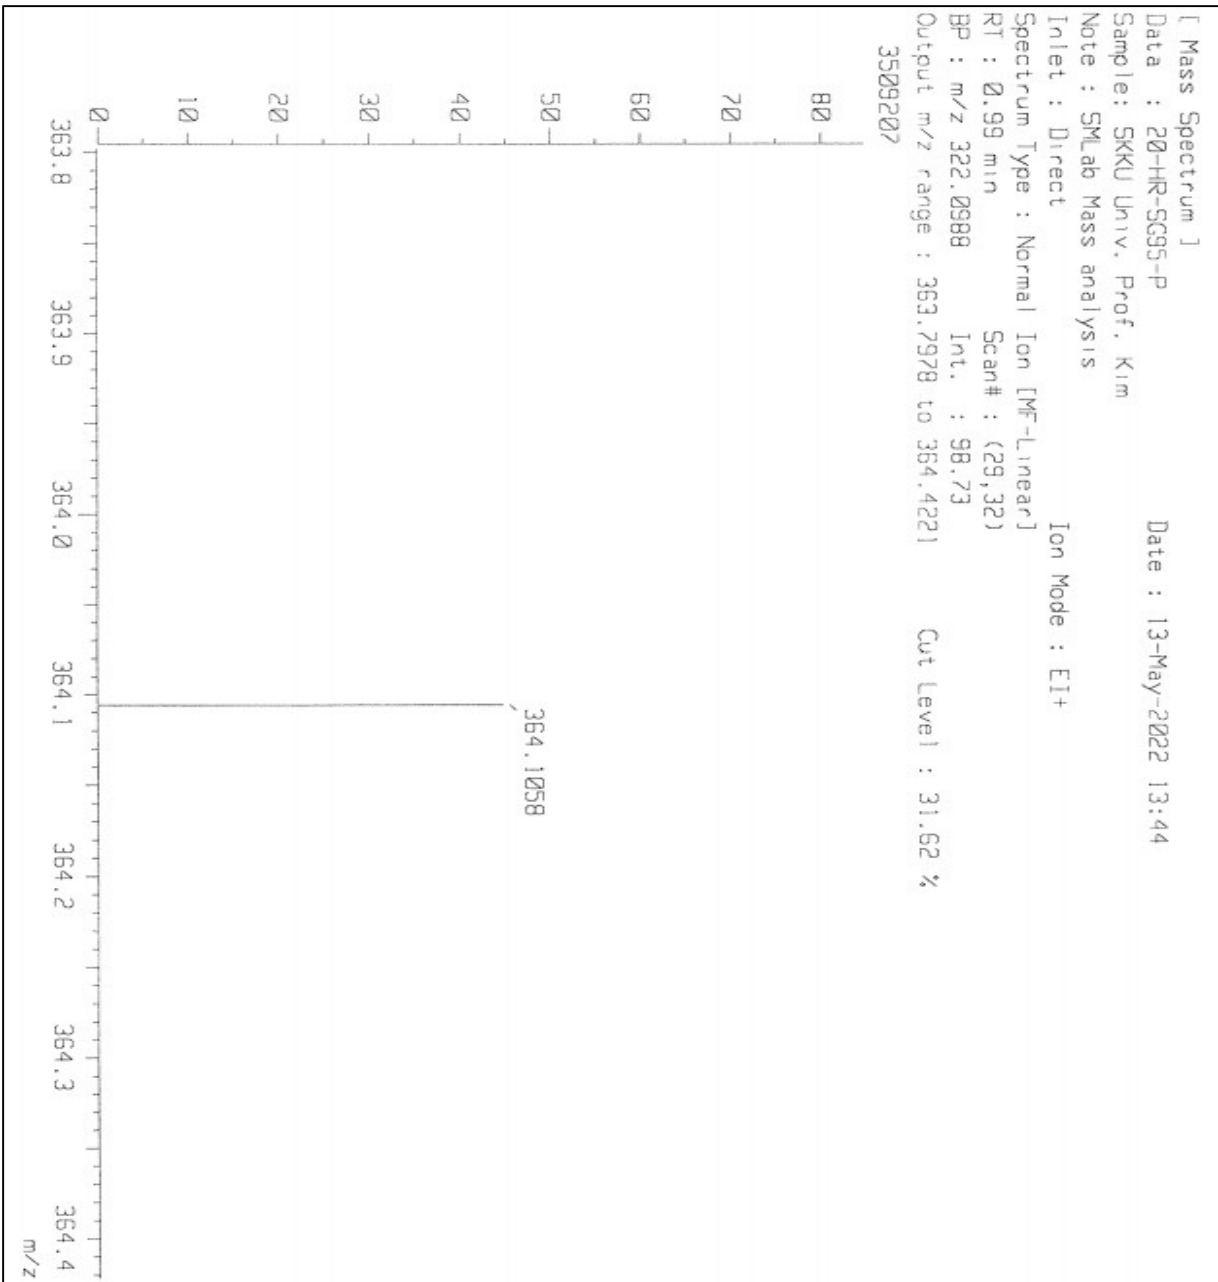

[ Elemental Composition ]

Data : 19-MS-291-P4-026 Date : 25-May-2022 14:10  
 Sample: SKKU Univ. Prof. Kim  
 Note : SMLab Mass analysis  
 Inlet : Direct Ion Mode : EI+  
 RT : 2.19 min Scan#: (57,76)  
 Elements : C 30/0, H 33/0, O 4/0, N 2/0  
 Mass Tolerance : 1000ppm, 3mmu if m/z < 3, 5mmu if m/z > 5  
 Unsaturation (U.S.) : -0.5 - 70.0

6b

| Observed m/z | Int%  | Err[ppm / mmu] | U.S. | Composition       |
|--------------|-------|----------------|------|-------------------|
| 482.2204     | 100.0 | -0.3 / -0.2    | 17.0 | C 30 H 30 O 4 N 2 |

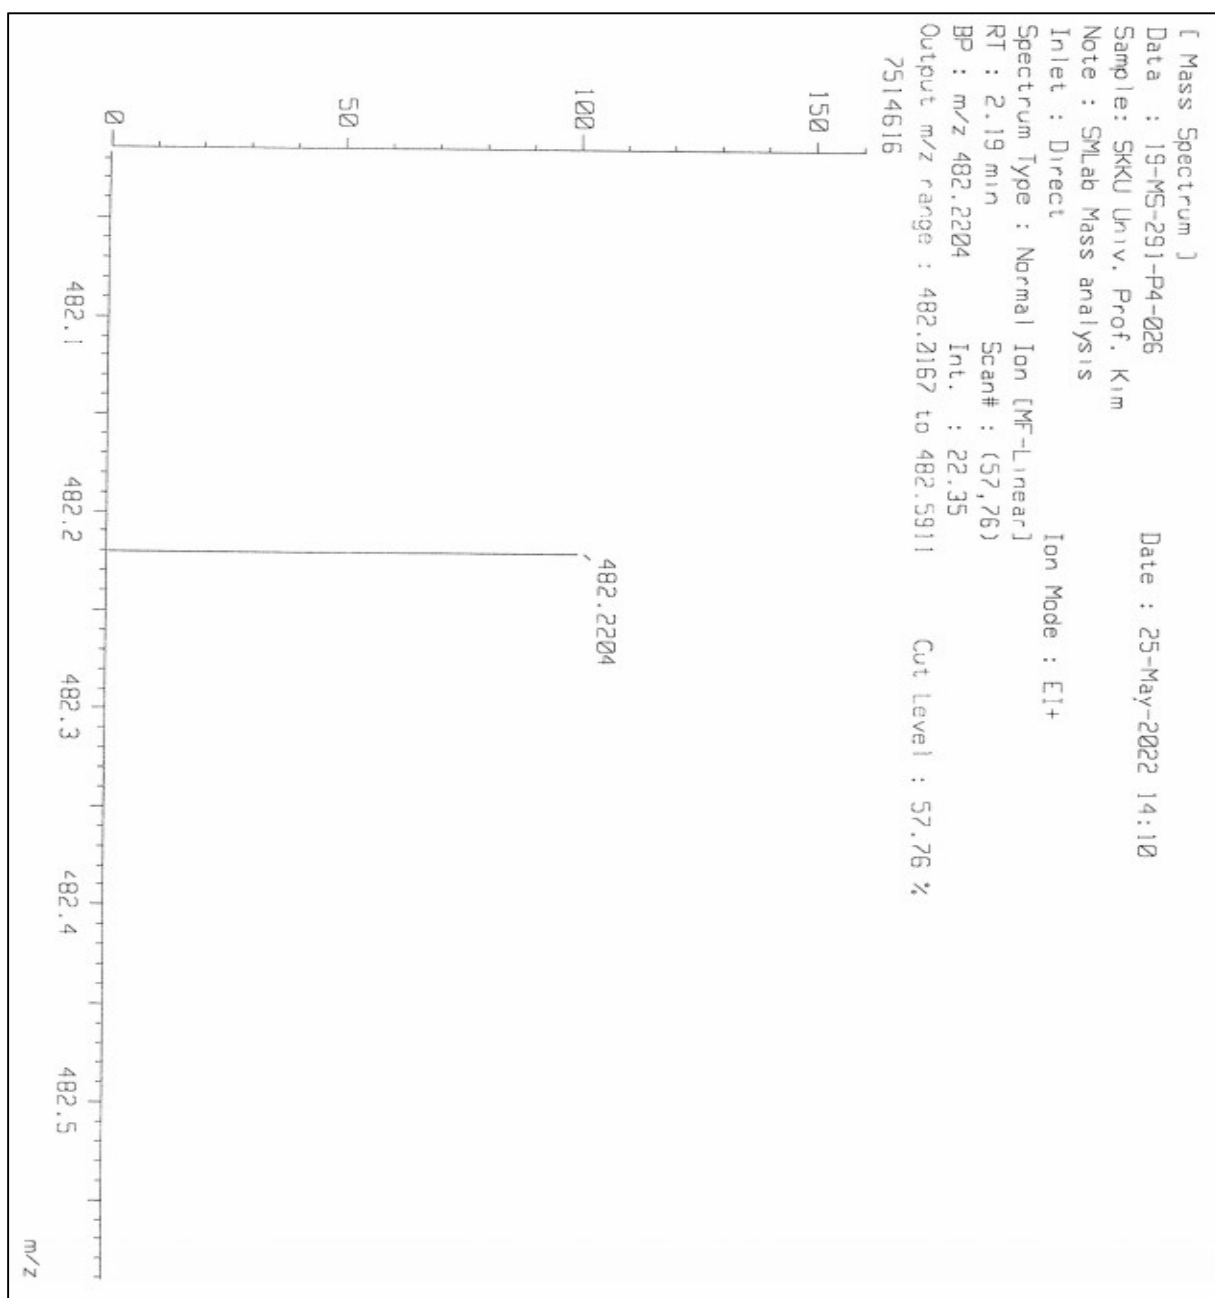

[ Elemental Composition ]

Data : 9-SG102-P-011  
 Sample: SKKU Univ. Prof. Kim  
 Note : SMLab Mass analysis  
 Inlet : Direct

Date : 08-Apr-2022 20:40

6c

RT : 1.50 min  
 Elements : C 37/0, H 37/0, O 3/0, N 2/0  
 Mass Tolerance : 1000ppm, 3mmu if m/z < 3, 5mmu if m/z > 5  
 Unsaturation (U.S.) : -0.5 - 70.0

Ion Mode : EI+  
 Scan#: (44,48)+43

| Observed m/z | Int%  | Err [ppm / mmu] | U.S. | Composition       |
|--------------|-------|-----------------|------|-------------------|
| 532.2728     | 100.0 | +0.3 / +0.2     | 19.0 | C 35 H 36 O 3 N 2 |

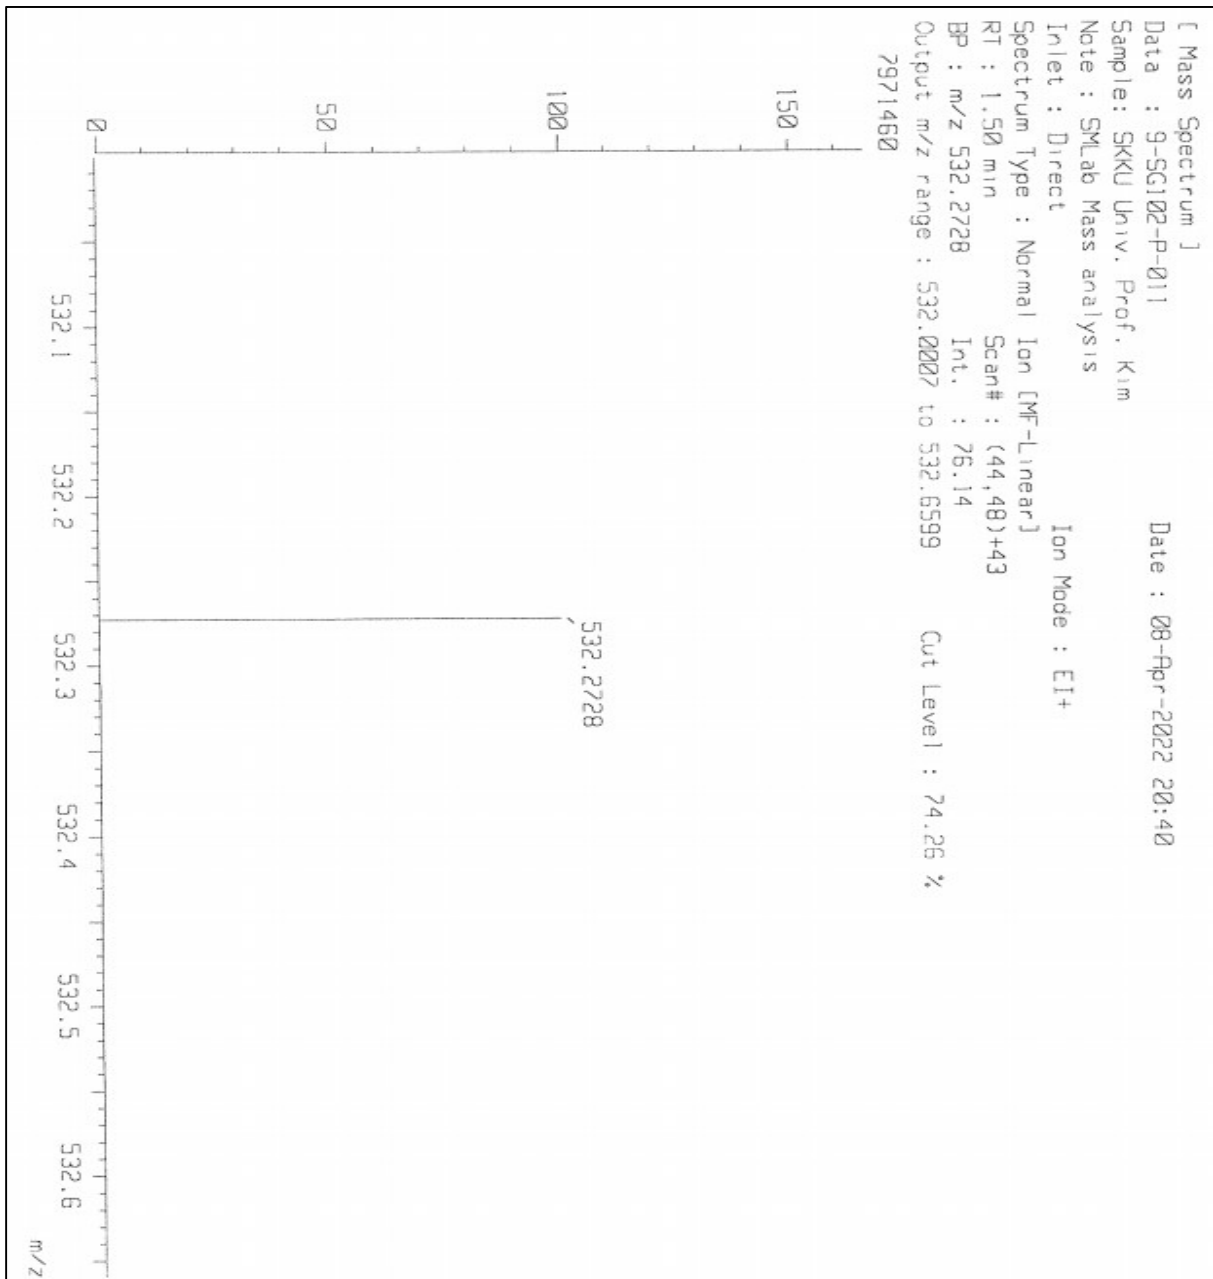

[ Elemental Composition ]

Data : FAB-HR-SG109-P-009  
Sample: SKKU Univ. Prof. Kim  
Note : SM Lab Research Center

Date : 27-May-2022 10:17

Page: 1

6d

Inlet : Reserv.  
RT : 3.07 min

Ion Mode : FAB+  
Scan#: 93

Elements : C 45/0, H 40/0, O 3/0, N 6/0

Mass Tolerance : 1000ppm, 3mmu if m/z < 3, 10mmu if m/z > 10

Unsaturation (U.S.) : -0.5 - 80.0

| Observed m/z | Int%  | Err[ppm / mmu] | U.S. Composition       |
|--------------|-------|----------------|------------------------|
| 699.3080     | 100.0 | -0.5 / -0.4    | 28.5 C 44 H 39 O 3 N 6 |

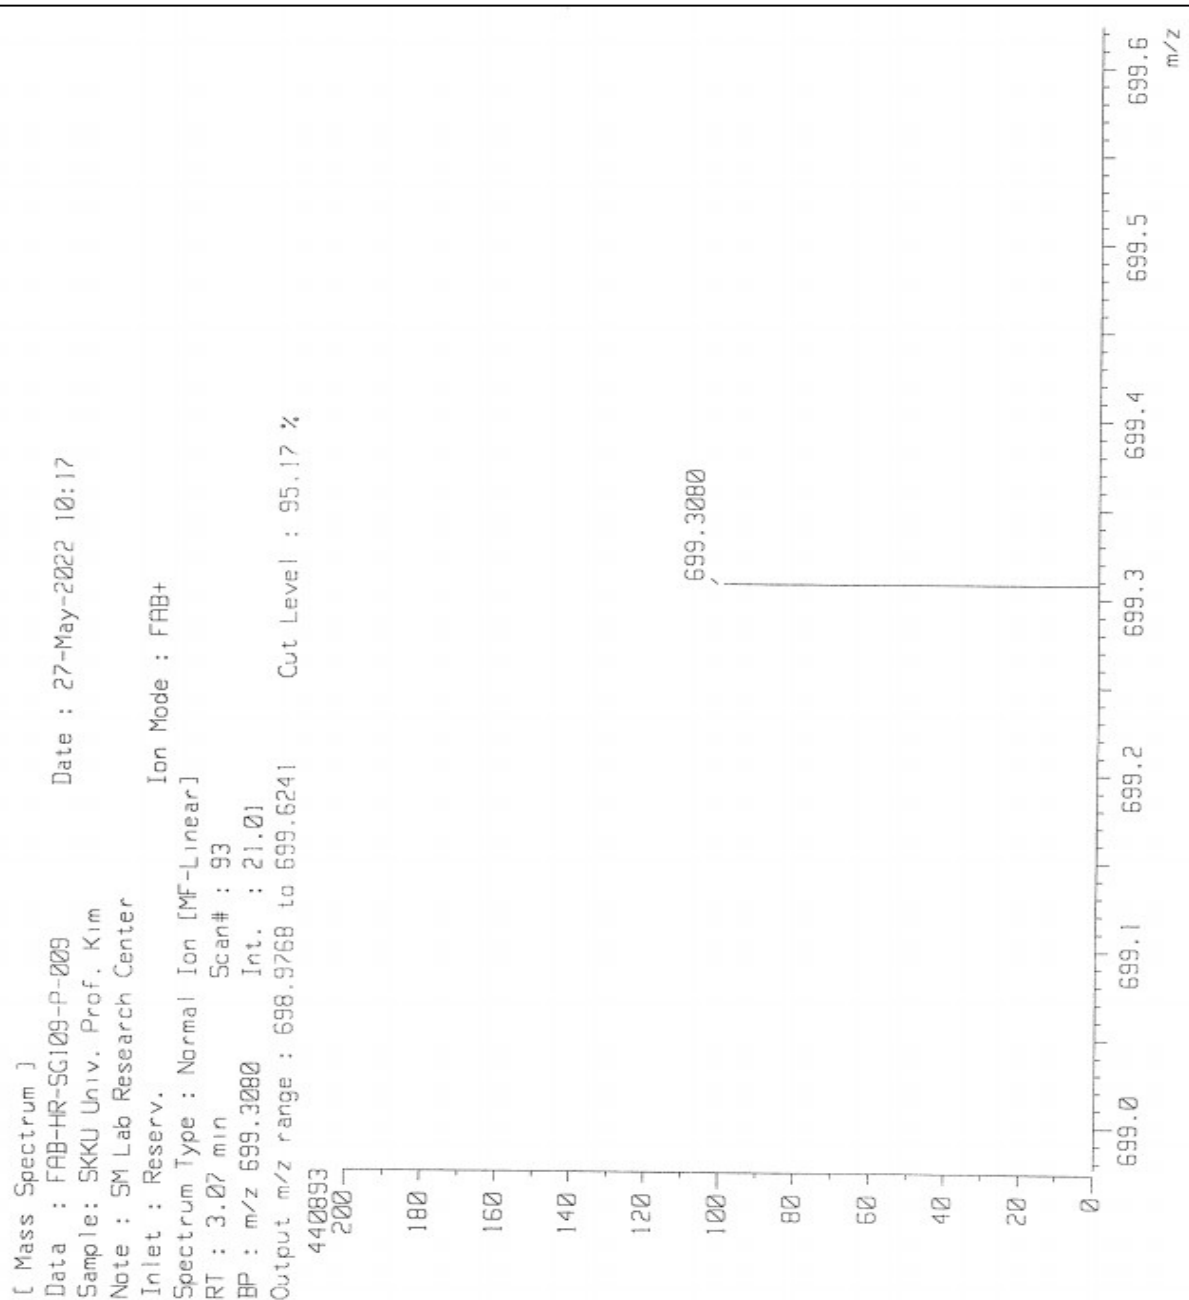

[ Elemental Composition ]

Data : 10-SG106-P2-012  
 Sample: SKKU Univ. Prof. Kim  
 Note : SMLab Mass analysis

Date : 08-Apr-2022 20:43

6e

Inlet : Direct  
 RT : 1.44 min  
 Elements : C 40/0, H 45/0, O 5/0, N 5/0  
 Mass Tolerance : 1000ppm, 3mmu if m/z < 3, 5mmu if m/z > 5  
 Ion Mode : EI+  
 Scan#: (43,45)  
 Saturation (U.S.) : -0.5 - 70.0

| Observed m/z | Int% | Err[ppm / mmu] | U.S. | Composition       |
|--------------|------|----------------|------|-------------------|
| 636.3311     | 95.1 | -0.2 / -0.1    | 19.0 | C 38 H 44 O 5 N 4 |

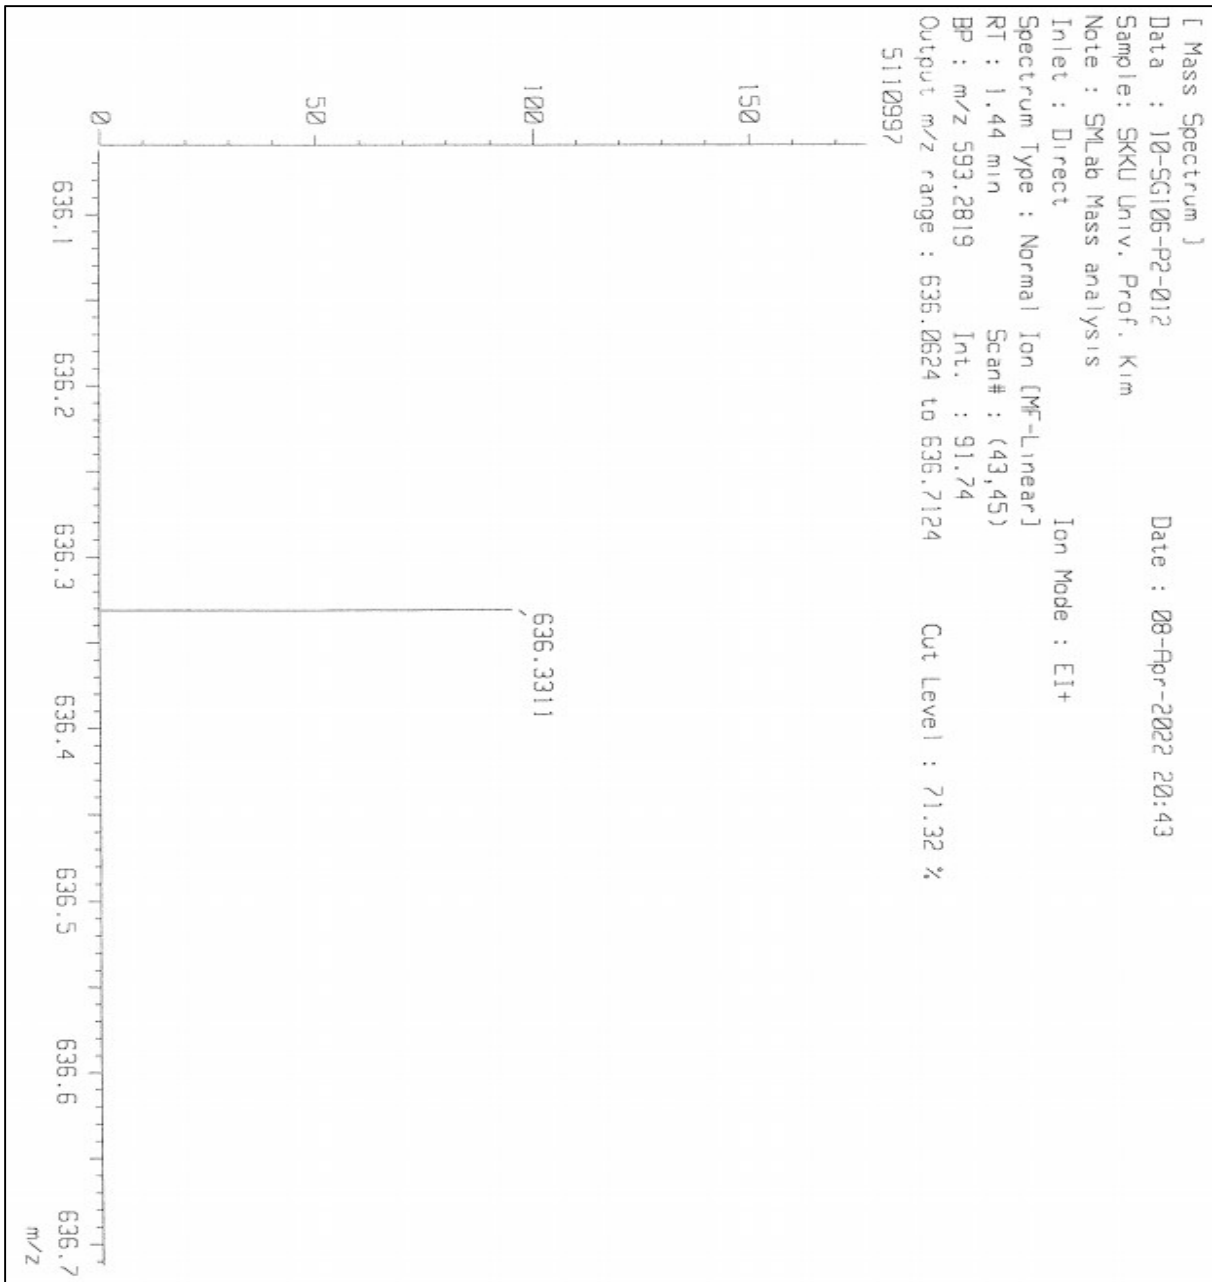

[ Elemental Composition ]

Data : 23-MS-282-P-030  
 Sample: SKKU Univ. Prof. Kim  
 Note : SMLab Mass analysis

Date : 25-May-2022 14:22

Page: 1

9a

Inlet : Direct  
 RT : 1.82 min

Ion Mode : EI+  
 Scan#: (48,63)

Elements : C 25/0, H 30/0, O 4/0, N 2/0

Mass Tolerance : 1000ppm, 3mmu if m/z < 3, 5mmu if m/z > 5

Unsaturation (U.S.) : -0.5 - 70.0

| Observed m/z | Int%  | Err[ppm / mmu] | U.S. | Composition       |
|--------------|-------|----------------|------|-------------------|
| 394.1893     | 100.0 | +0.1 / +0.0    | 12.0 | C 23 H 26 O 4 N 2 |

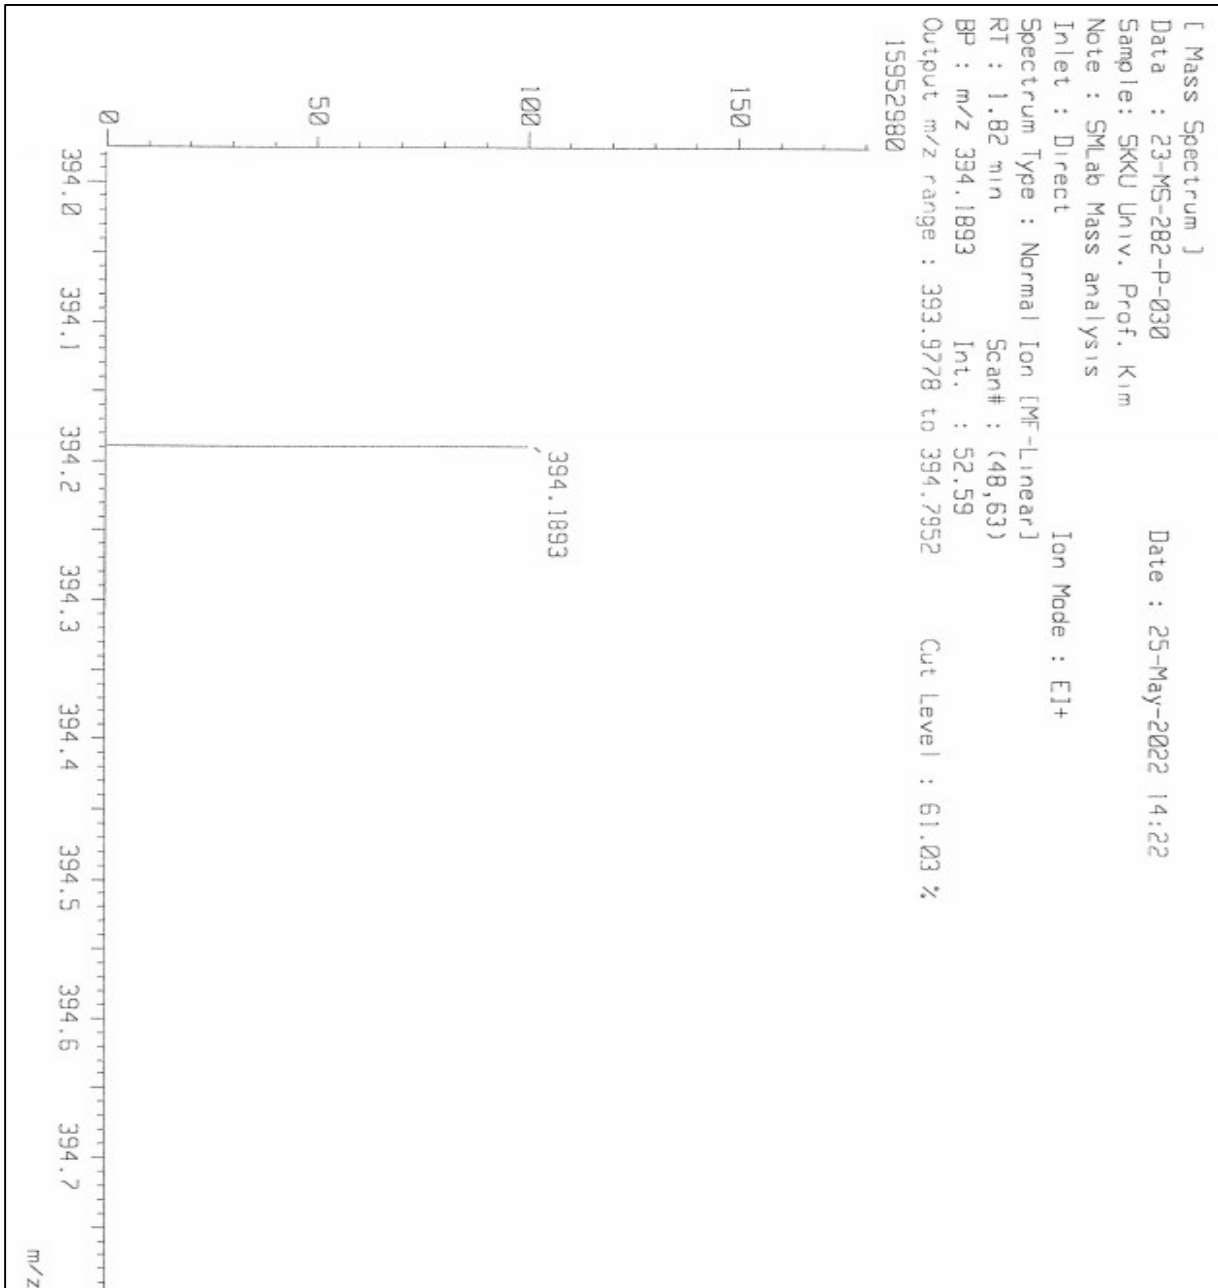

[ Elemental Composition ]

Data : 25-MS-294-P-032  
 Sample: SKKU Univ. Prof. Kim  
 Note : SMLab Mass analysis

Date : 25-May-2022 14:27

Page: 1

9b

Inlet : Direct

Ion Mode : EI+

RT : 1.77 min

Scan#: (50,58)

Elements : C 23/0, H 25/0, O 4/0, N 2/0

Mass Tolerance : 1000ppm, 3mmu if m/z < 3, 5mmu if m/z > 5

Unsaturation (U.S.) : -0.5 - 70.0

| Observed m/z | Int%  | Err[ppm / mmu] | U.S. | Composition       |
|--------------|-------|----------------|------|-------------------|
| 366.1577     | 100.0 | -0.8 / -0.3    | 12.0 | C 21 H 22 O 4 N 2 |

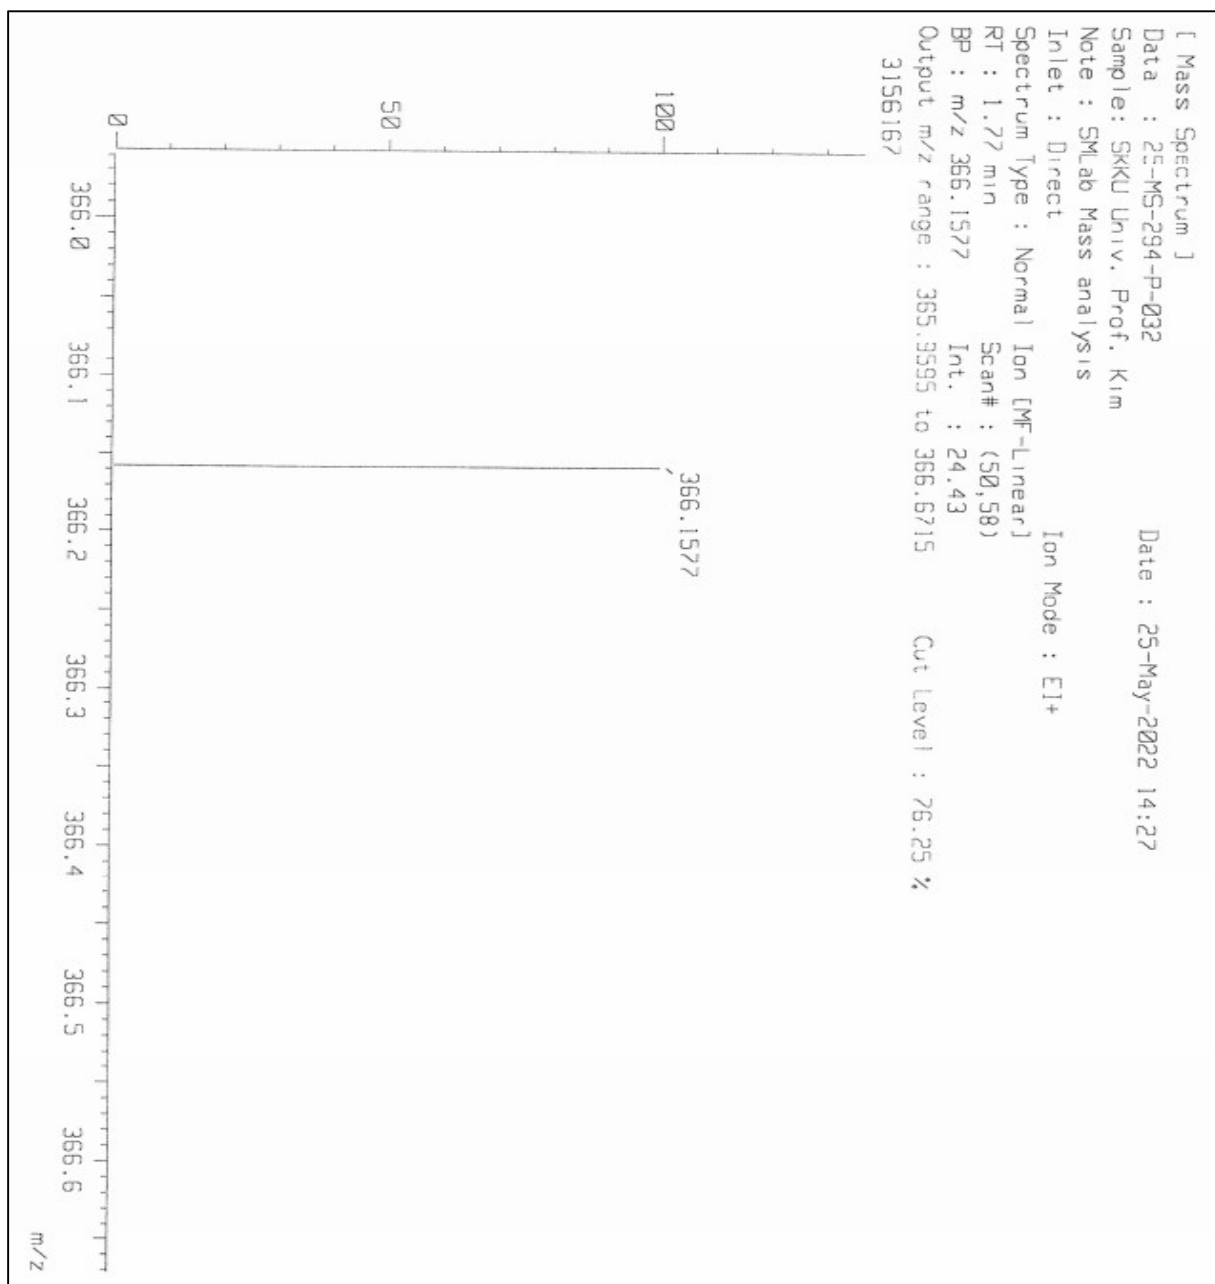

[ Elemental Composition ]

Data : 4-CE-99-P-004  
Sample: SKKU. Univ. Prof. Kim  
Note : SMLab Mass analysis

Date : 31-Oct-2022 16:47

9c

Inlet : Direct  
RT : 1.75 min  
Elements : C 22/0, H 23/0, O 4/0, N 3/0  
Mass Tolerance : 1000ppm, 3mmu if m/z < 3, 10mmu if m/z > 10  
Unsaturation (U.S.) : -0.5 - 70.0

Ion Mode : EI+  
Scan#: (43,64)

| Observed m/z | Int%  | Err [ppm / mmu] | U.S. Composition       |
|--------------|-------|-----------------|------------------------|
| 378.1581     | 100.0 | +0.5 / +0.2     | 13.0 C 22 H 22 O 4 N 2 |

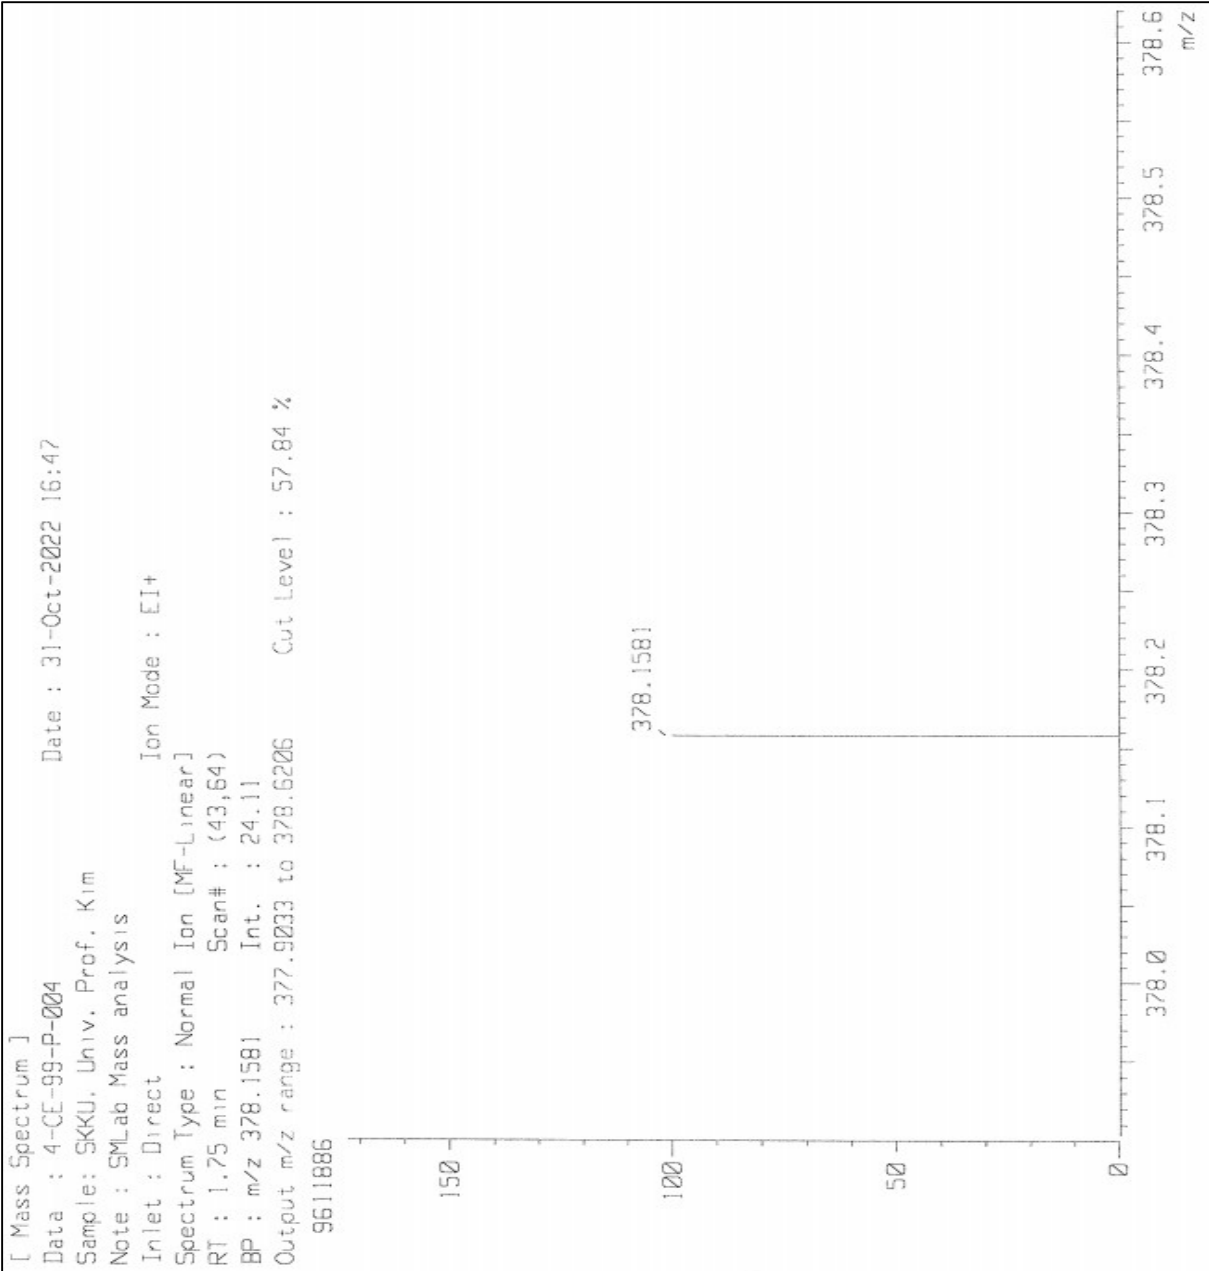



[ Elemental Composition ]

Data : FAB-SG-93-P-003  
 Sample: SKKU Univ. Prof. Kim  
 Note : SM Lab Research Center  
 Inlet : Reserv.  
 RT : 3.38 min  
 Elements : C 25/0, H 25/0, O 5/0, N 1/0, F 3/0, Ir 1/0  
 Mass Tolerance : 1000ppm, 3mmu if m/z < 3, 10mmu if m/z > 10  
 Unsaturation (U.S.) : -0.5 - 80.0

Date : 25-Mar-2022 16:08

Iridacycle-1a

Ion Mode : FAB+  
 Scan#: (101,104)+100+104+104

| Observed m/z | Int%  | Err[ppm / mmu] | U.S. | Composition            |
|--------------|-------|----------------|------|------------------------|
| 641.1362     | 100.0 | -0.4 / -0.3    | 12.0 | C 24 H 25 O 4 N F 3 Ir |

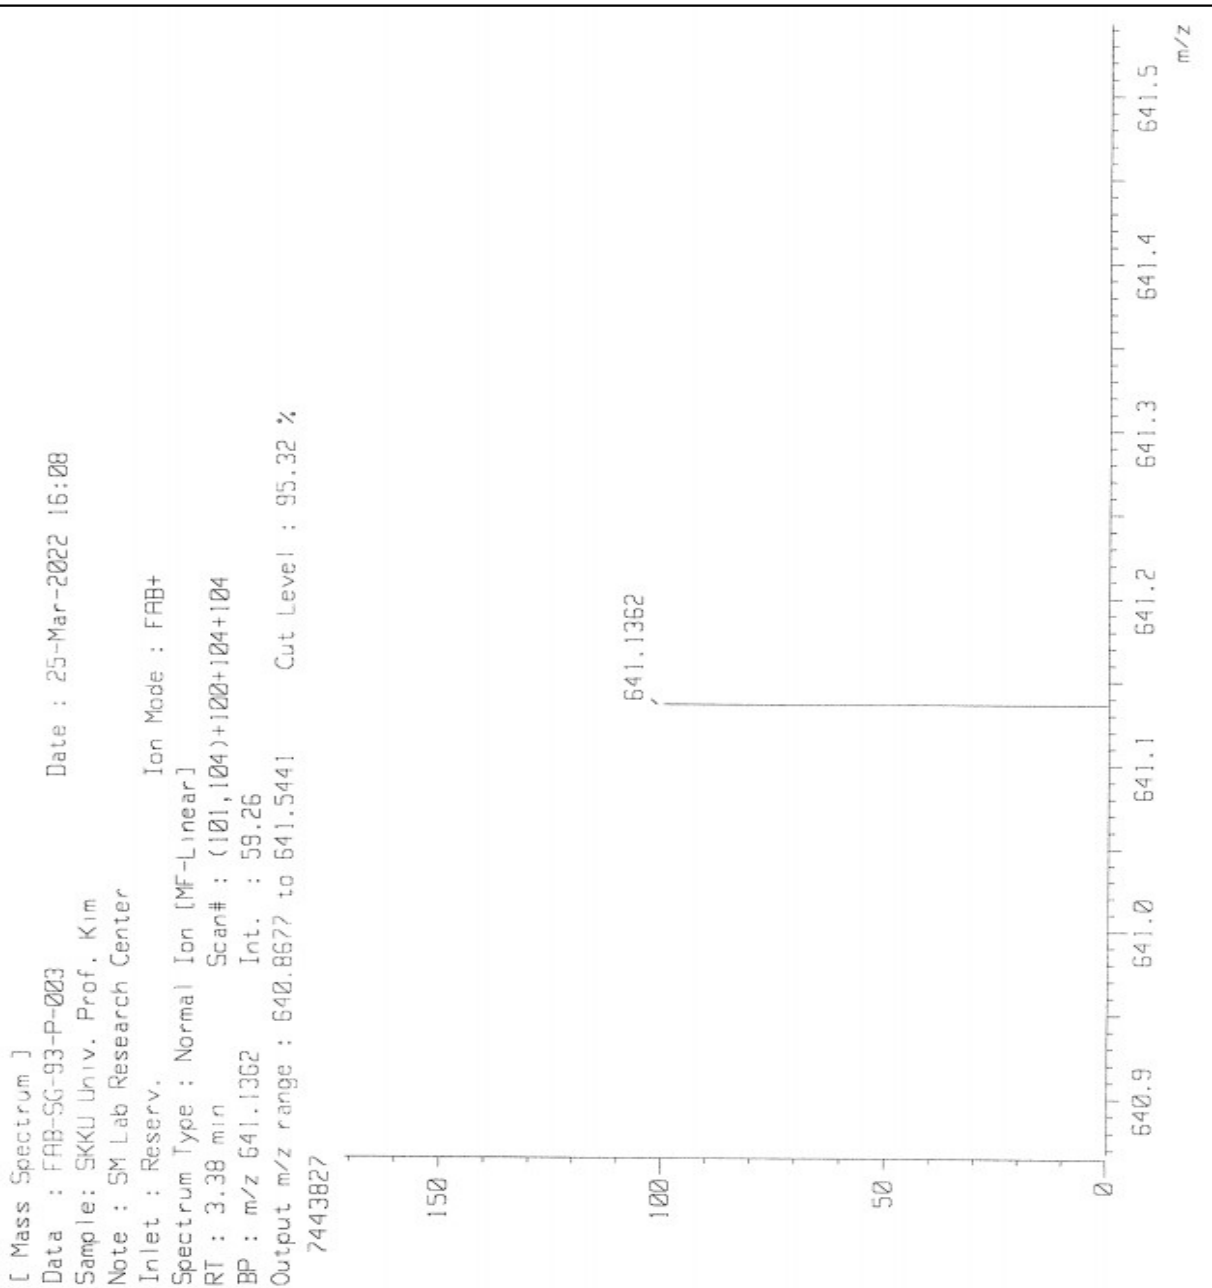

Supplement: d2cc05245h1.pdf [file d2cc05245h1.pdf]
